# Supplementary material for: Globally distributed marine Gemmatimonadota have unique genomic potentials
Source: Research Square preprint supplement (doi:10.21203/rs.3.rs-3894446/v1), 2024-01-25
Supplement: Supplementary file 1 [file d1d632f6cf53c0a90f967364.xlsx]

## Sheet: Table List
List of Supplementary Tables	Captions
ST 1	Metadata of samples that recovered Gemmatimonadota genomes and sample that were used to recover genomes in this study.
ST 2	Information of the genomes used and described in this study, including genomic statistics using checkM and taxonomy affiliations from GTDB-Tk as described in methods.
ST 3	Average of Amino Acid Identity (AAI) of the genomes from this study and phylogenetically closely related and publicly available genomes.
ST 4	Comparison of average of Amino Acid Identity (AAI) of the genomes in different groups
ST 5	Carbohydrate activate enzymes (CAZymes) identified using dbcan2 in the 245 genomes described in this study.
ST 6	Statistics of the identified CAZyme families found in four Gemmatimonadota groups.
ST 7	Peptidases identified in the 245 genomes described in this study against the MEROPS database.
ST 8	Statistics of the identified peptidase found in four Gemmatimonadota groups.
ST 9	Gene counts of the annotated sequences in the 245 proteomes described in this study. Combined annotations from KofamScan and KAAS are shown. ND: Not detected.
ST 10	CRISPR spacer identified in 245 Gemmatimonadota genomes
ST 11	Viral-host matches identified in this study.
ST 12	Statistics of 32 high- and medium-quality vMAGs identified in this study.
ST 13	Annotation of auxiliary metabolic genes (AMGs) identified in 32 vMAGs.
ST 14	Annotation of genes identified in 32 vMAGs.
ST 15	Parameters for the construction of phylogentic tree of each marker gene.
z

## Sheet: ST 1
Metadata of samples which recovered Gemmatimonadetes genomes in NCBI
Habitat	Sampling Site	Water Depth (m)	Sample Depth (cm)	Sampling Date	Latitude/Longitude
Coastal Sediment	Bothnian Sea, Sweden	33.2	2.4	Unknown	63.29N/19.49E
Coastal Sediment	Port Phillip Bay, Australia	0	0-17	Unknown	37.85S/144.95E
Pelagic Sediment	Gulf of Khambhat, India	-48 - -5	1-100	May-2017	22.6N/69.5E
Pelagic Sediment	Pacific Ocean	6844	0-1	Unknown	12.63N/144.72E
Coral Reef	Great Barrier Reef, Australia	Unknown	Unknown	Oct-2016	18.49S/147.63E
Coral Reef	Orpheus Island, Australia	Unknown	Unknown	Oct-2013	18.5446S/146.4881E
Engineered System	Hangzhou, China	Unknown	Unknown	Oct-2013	30N/120E
Engineered System	Canada	Unknown	Unknown	Jun-2016	Unknown
Engineered System	Brisbane, Australia	Unknown	Unknown	Sep-2015	27.4972S/153.0131E
Engineered System	Anaerobic–aerobic sequential batch waster treatment reactor, Ontario	Unknown	Unknown	Jul-2003	43.5245N/80.2644W
Engineered System	water treatment reactor	Unknown	Unknown	Feb-2010	35.707N/139.759E
Engineered System	University of Cape Town, South Africa	Unknown	Unknown	Feb-2010	33.96S/18.46E
Engineered System	Shanghai, China	Unknown	Unknown	Dec-2018	31.5N/121.42E
Engineered System	Netherlands	Unknown	Unknown	Unknow	52.326N/4.858E
Freshwater	Hamburg-Reitbrook, Germany	Unknown	Unknown	Unknow	53.466667N/10.15E
Freshwater	Lake Baikal, Russia	1250/1350	Unknown	Mar-2018	51.7874N/104.9391E
Freshwater	Zackenberg, Greenland	Unknown	Unknown	Aug-2017	74.4701N/20.5172W
Freshwater	Swan Lake, Western Gobi Desert, China	Unknown	Unknown	Dec-2011	42.005N/101.585E
Freshwater	Chattahoochee River	Unknown	Unknown	June-2010	34.824N/83.791W
Freshwater	Highgate Springs	Unknown	Unknown	Unknown	44.979N/73.105W
Freshwater	Queensland	Unknown	Unknown	Unknown	27.497S/153.013
Hot Spring Sediment	British Columbia, Canada	Unknown	Unknown	Sep-2012	49.9543N/116.5155W
Hydrothermal Vent Sediment	Guaymas Basin, Atlantic Ocean	Unknown	Unknown	Aug-2012	15.16S/13.35W
Hydrothermal Vent Plume	Guaymas Basin, USA	Unknown	Unknown	Jul-2004	27.51583N/111.425W
Hydrothermal Vent Plume	Mid Cayman Rise	Unknown	Unknown	Jan-2012	18.3764N/81.7981W
Hydrothermal Vent Plume	Lau Basin, Pacific Ocean	Unknown	Unknown	Jun-2009	20.0538S/176.1336W
Hydrothermal Vent Plume	Lau Basin, Pacific Ocean	Unknown	Unknown	Jun-2009	22.1803S/176.6014W
Lake Sediment	Xiaochaidan Lake, China	3400	5	Nov-2016	37.53N/95.43E
Lake Sediment	Kulunda Steppe, Russia	140	Unknown	Jul-2016	52.11N/79.17E
Lake Sediment	Kulunda Steppe, Russia	Unknown	162	Jul-2016	51.66N/79.79E
Lake Sediment	Cariboo Plateau, Canada	1090	5	May-2015	51.3275N/121.6331W
Lake Sediment	Tataling River, China	3400	5	Nov-2016	37.53N/95.431E
Lake Sediment	Rifle	Unknown	Unknown	Sep-2011	39.5369N/107.7828W
Lake Sediment	White Oak River Estuary	Unknown	8-12cm	Oct-2010	34.7414N/77.1234W
Meadow Soil	Angelo Coast Range Reserve, USA	Unknown	Unknown	Oct-2014	39.74N/123.63W
Meadow Soil	Stordalen Mire	0.12-0.15	Unknown	Aug-2012	68.3535N/19.0472E
Meadow Soil	Axel Heiberg Island	Unknown	Unknown	Unknown	79.75N/91W
Permafrost	Stordalen Mire, Sweden	363	0.5-0.55	May-2012	68.3535N/19.0472E
Permafrost	Mackay Glacier regions, Antarctica	Unknown	0-5	Jan-2015	76.58S/162E
Other	Sierra de Tejeda, Almijara and Alhama Natural Park, Spain	972	10	Feb-2013	36.9101N/3.8647W
Other	Albert, Canada	670	100	Jul-2016	50.75N/111.40W
Other	Kellogg Biological Station	Unknown	15	Feb-2013	Unknown
Other	Shikinejima Island	Unknown	Unknown	2016	34.318N/139.216E
Seawater	Red Sea, Saudi Arabia	5-1000	Unknown	2010	23.46N/36.74E
Seawater	North Sea	Unknown	Unknown	Unknown	56N/3E
Seawater	Eastern Africa Coastal Province,Indian Ocean	5-1000	Unknown	Oct-2017	14.564S/42.048E
Seawater	Marine Biology Station Piran, Slovenia	Unknown	Unknown	May-2014	45.5178N/13.5682E
Seawater	North Atlantic Ocean	5-1000	Unknown	2010	34.845N/70.466W
Seawater	North Pacific Ocean	5-1000	Unknown	2010	36.953N/165.355W
Seawater	Pacific Ocean	5-1000	Unknown	2010	Unknown
Seawater	Saline water	Unknown	Unknown	Unknown	Unknown
Seawater	Atlantic Ocean	5-1000	Unknown	Unknown	Unknown
Summary of samples from different habitats used this study
Habitat	Sampling Site	Water Depth (m)	Sample Depth (cm)	Sampling Date	Latitude/Longitude	Sampling ID
Coastal Sediment	Bohai Sea BHB10, China	17	0-2	Aug-2018	38.75N/118.1533E	BHB10-2
Coastal Sediment	Bohai Sea BHB10, China	17	24-26	Aug-2018	38.75N/118.1533E	BHB10-26
Coastal Sediment	Bohai Sea BHB10, China	17	36-38	Aug-2018	38.75N/118.1533E	BHB10-38
Coastal Sediment	Bohai Sea M3, China	26.5	8-10	Aug-2018	38.6675N/119.5475E	M3-10
Coastal Sediment	Bohai Sea M3, China	26.5	0-2	Aug-2018	38.6675N/119.5475E	M3-2
Coastal Sediment	Bohai Sea M3, China	26.5	20-22	Aug-2018	38.6675N/119.5475E	M3-22
Coastal Sediment	Bohai Sea M3, China	26.5	28-30	Aug-2018	38.6675N/119.5475E	M3-30
Coastal Sediment	Bohai Sea M3, China	26.5	36-38	Aug-2018	38.6675N/119.5475E	M3-38
Coastal Sediment	Bohai Sea M3, China	26.5	42-44	Aug-2018	38.6675N/119.5475E	M3-44
Coastal Sediment	Bohai Sea M8, China	30.5	10-12	Aug-2018	39.6928N/120.6606E	M8-12
Coastal Sediment	Bohai Sea M8, China	30.5	0-2	Aug-2018	39.6928N/120.6606E	M8-2
Coastal Sediment	Bohai Sea M8, China	30.5	30-32	Aug-2018	39.6928N/120.6606E	M8-32
Coastal Sediment	Bohai Sea M8, China	30.5	42-44	Aug-2018	39.6928N/120.6606E	M8-44
Coastal Sediment	Bohai Sea M8, China	30.5	56-58	Aug-2018	39.6928N/120.6606E	M8-58
Coastal Sediment	Bohai Sea M8, China	30.5	60-62	Aug-2018	39.6928N/120.6606E	M8-62
Coastal Sediment	San Francisco Bay 13, USA	9	0-3	Jan-2018	38.02833N/122.37W	13_Jan_SF
Coastal Sediment	San Francisco Bay 13, USA	9	0-3	Jul-2018	38.02833N/122.37W	13_July_SF
Coastal Sediment	San Francisco Bay 13, USA	9	0-3	May-2018	38.02833N/122.37W	13_May_SF
Coastal Sediment	San Francisco Bay 13, USA	9	0-3	Oct-2018	38.02833N/122.37W	13_Oct_SF
Coastal Sediment	San Francisco Bay 13, USA	17	0-3	2018-01-01	37.788333N/122.358333W	21_Jan_SF
Coastal Sediment	San Francisco Bay 4-1, USA	11	0-3	Jan-2018	38.048333N/121.935W	4_1_Jan_SF
Coastal Sediment	San Francisco Bay 4-1, USA	11	0-3	May-2018	38.048333N/121.935W	4_1_May_SF
Coastal Sediment	San Francisco Bay 4-1, USA	11	0-3	Oct-2018	38.048333N/121.935W	4_1_Oct_SF
Coastal Sediment	San Francisco Bay 8-1, USA	14	0-3	Jul-2018	38.03N/122.151667W	8_1_July_SF
Coastal Sediment	San Francisco Bay 8-1, USA	14	0-3	May-2018	38.03N/122.151667W	8_1_May_SF
Coastal Sediment	San Francisco Bay 8-1, USA	14	0-3	Oct-2018	38.03N/122.151667W	8_1_Oct_SF
Hydrothermal Vent Sediment	Guaymas Basin Megamat19, Mexico	2000	0-2	Dec-2008	27.010833N/111.415556W	Meg19_02
Hydrothermal Vent Sediment	Guaymas Basin Megamat19, Mexico	2000	4-6	Dec-2008	27.010833N/111.415556W	Meg19_46
Hydrothermal Vent Sediment	Guaymas Basin Megamat22, Mexico	2000	0-2	Dec-2008	27.010833N/111.415556W	Meg22_02
Hydrothermal Vent Sediment	Guaymas Basin Aceto Balsamico, Mexico	2000	0-3	Dec-2008	27.010833N/111.415556W	AB_03
Hydrothermal Vent Sediment	Guaymas Basin Aceto Balsamico, Mexico	2000	6-9	Dec-2008	27.010833N/111.415556W	AB_69
Hydrothermal Vent Sediment	Guaymas Basin Aceto Balsamico, Mexico	2000	12-15	Dec-2008	27.010833N/111.415556W	AB_1215
Hydrothermal Vent Mat	Longqi Vent, Southwest Indian Ocean	2782	Surface Microbial Mat	Dec-2018	37.78021S/49.64818E	LQ108M
Hydrothermal Vent Oxide	Longqi Vent, Southwest Indian Ocean	2743	Oxide	Jan-2015	37.78S/49.65E	LQ971M
Hydrothermal Vent Oxide	Longqi Vent, Southwest Indian Ocean	2760	Oxide	Jan-2015	37.78S/49.65E	LQ95YO
Hydrothermal Vent Oxide	Tiancheng Vent, Southwest Indian Ocean	2000	Oxide	Dec-2014	27.85S/63.92E	TC87O
Cold Seep Sediment	Haima Cold Seep SY72-5, China	1389	0-2	May-2018	16.73N/110.47E	SY72-5-1
Cold Seep Sediment	Haima Cold Seep SY70-5, China	1389	8-10	May-2018	16.73N/110.47E	SY70-5-5
Cold Seep Sediment	Haima Cold Seep SY70-4, China	1389	4-6	May-2018	16.73N/110.47E	SY70-4-3

## Sheet: ST 2
Genome Property																		Metadata			CheckM v1.1.3 Output													GDTB-Tk v1.5.1 (GTDB Release R202) Output
GenBank Assembly Accession	Genome Name	Group	Shown in the High Quality Tree	Genomes from this study	Taxonomy in NCBI (Phylum)	Taxonomy in GTDB-Tk	16S	Genome Size (Mbp)	Predicted Genome Size (Mbp)	Number of Scaffolds	Longest Scaffold (bp)	N50 (bp)	GC Percentage (%)	Predicted Gene_counts	Total Length (bp)	Minimum Length (bp)	Average Length (bp)	Sampling Site	Habitat	Coordinates	Marker lineage	genomes	markers	marker sets	0	1	2	3	4	5+	Completeness	Contamination	Strain heterogeneity	classification	fastani_reference	fastani_reference_radius	fastani_taxonomy	fastani_ani	fastani_af	closest_placement_reference	closest_placement_radius	closest_placement_taxonomy	closest_placement_ani	closest_placement_af	pplacer_taxonomy	classification_method	note	other_related_references(genome_id,species_name,radius,ANI,AF)	aa_percent
GCA_029864665.1	13_Jan_SF_Bin53	Group2	Y	Yes	Gemmatimonadetes	d__Bacteria;p__Gemmatimonadota;c__Gemmatimonadetes;o__Gemmatimonadales;f__GWC2-71-9;g__WVYX01;s__	N	3.58796	3.89108	500	34929	9260	65.85	3660	3587961	2010	7175.9	San Francisco Bay 13, USA	Coastal Sediment	38.02833N/122.37W	k__Bacteria (UID2495)	2993	147	91	8	137	2	0	0	0	92.21	2.2	0	d__Bacteria;p__Gemmatimonadota;c__Gemmatimonadetes;o__Gemmatimonadales;f__GWC2-71-9;g__WVYX01;s__	N/A	N/A	N/A	N/A	N/A	GCA_011772755.1	95	d__Bacteria;p__Gemmatimonadota;c__Gemmatimonadetes;o__Gemmatimonadales;f__GWC2-71-9;g__WVYX01;s__WVYX01 sp011772755	76.54	0.13	d__Bacteria;p__Gemmatimonadota;c__Gemmatimonadetes;o__Gemmatimonadales;f__GWC2-71-9;g__;s__	taxonomic classification defined by topology and ANI	N/A	N/A	84
GCA_029864205.1	13_July_SF_Bin32	Group2	Y	Yes	Gemmatimonadetes	d__Bacteria;p__Gemmatimonadota;c__Gemmatimonadetes;o__Gemmatimonadales;f__GWC2-71-9;g__WVYX01;s__	Y	3.78384	3.86896	112	214590	76032	65.9	3478	3783840	2138	33784.3	San Francisco Bay 13, USA	Coastal Sediment	38.02833N/122.37W	k__Bacteria (UID2495)	2993	147	91	2	143	2	0	0	0	97.8	2.2	0	d__Bacteria;p__Gemmatimonadota;c__Gemmatimonadetes;o__Gemmatimonadales;f__GWC2-71-9;g__WVYX01;s__	N/A	N/A	N/A	N/A	N/A	GCA_011772755.1	95	d__Bacteria;p__Gemmatimonadota;c__Gemmatimonadetes;o__Gemmatimonadales;f__GWC2-71-9;g__WVYX01;s__WVYX01 sp011772755	76.61	0.11	d__Bacteria;p__Gemmatimonadota;c__Gemmatimonadetes;o__Gemmatimonadales;f__GWC2-71-9;g__;s__	taxonomic classification defined by topology and ANI	N/A	N/A	93.23
GCA_029863935.1	13_July_SF_Bin57	Group3	N	Yes	Gemmatimonadetes	d__Bacteria;p__Gemmatimonadota;c__Gemmatimonadetes;o__KS3-K002;f__JABDQB01;g__;s__	N	1.43158	2.60477	415	12272	3501	64.59	1664	1431580	2002	3449.6	San Francisco Bay 13, USA	Coastal Sediment	38.02833N/122.37W	k__Bacteria (UID2495)	2993	147	91	71	73	3	0	0	0	54.96	1.75	33.33	d__Bacteria;p__Gemmatimonadota;c__Gemmatimonadetes;o__KS3-K002;f__JABDQB01;g__;s__	N/A	N/A	N/A	N/A	N/A	GCA_013042495.1	95	d__Bacteria;p__Gemmatimonadota;c__Gemmatimonadetes;o__KS3-K002;f__JABDQB01;g__JABDQB01;s__JABDQB01 sp013042495	76.83	0.04	d__Bacteria;p__Gemmatimonadota;c__Gemmatimonadetes;o__KS3-K002;f__JABDQB01;g__;s__	taxonomic classification defined by topology and ANI	N/A	N/A	42.58
GCA_029864005.1	13_July_SF_Bin5	Group4	N	Yes	Gemmatimonadetes	d__Bacteria;p__Gemmatimonadota;c__Gemmatimonadetes;o__Longimicrobiales;f__UBA6960;g__;s__	N	3.45714	4.38778	791	24327	4902	65.61	3877	3457135	2002	4370.6	San Francisco Bay 13, USA	Coastal Sediment	38.02833N/122.37W	k__Bacteria (UID2495)	2993	147	91	40	97	10	0	0	0	78.79	9.41	10	d__Bacteria;p__Gemmatimonadota;c__Gemmatimonadetes;o__Longimicrobiales;f__UBA6960;g__;s__	N/A	N/A	N/A	N/A	N/A	N/A	N/A	N/A	N/A	N/A	d__Bacteria;p__Gemmatimonadota;c__Gemmatimonadetes;o__Longimicrobiales;f__UBA6960;g__;s__	taxonomic novelty determined using RED	N/A	N/A	61.68
GCA_029863645.1	13_May_SF_Bin31	Group4	Y	Yes	Gemmatimonadetes	d__Bacteria;p__Gemmatimonadota;c__Gemmatimonadetes;o__Longimicrobiales;f__UBA6960;g__UBA2982;s__	N	3.90346	4.23461	269	101704	24244	65.26	3913	3903460	2067	14511	San Francisco Bay 13, USA	Coastal Sediment	38.02833N/122.37W	k__Bacteria (UID2495)	2993	147	91	20	125	2	0	0	0	92.18	2.2	0	d__Bacteria;p__Gemmatimonadota;c__Gemmatimonadetes;o__Longimicrobiales;f__UBA6960;g__UBA2982;s__	N/A	N/A	N/A	N/A	N/A	GCA_002347035.1	95	d__Bacteria;p__Gemmatimonadota;c__Gemmatimonadetes;o__Longimicrobiales;f__UBA6960;g__UBA2982;s__UBA2982 sp002347035	76.22	0.03	d__Bacteria;p__Gemmatimonadota;c__Gemmatimonadetes;o__Longimicrobiales;f__UBA6960;g__UBA2982;s__	taxonomic classification defined by topology and ANI	N/A	GCA_009692205.1, s__UBA2982 sp009692205, 95.0, 77.35, 0.28	79.23
GCA_029863765.1	13_May_SF_Bin3	Group4	N	Yes	Gemmatimonadetes	d__Bacteria;p__Gemmatimonadota;c__Gemmatimonadetes;o__Longimicrobiales;f__UBA6960;g__;s__	N	3.40016	5.6764	912	17293	3966	66.18	3589	3400161	2001	3728.2	San Francisco Bay 13, USA	Coastal Sediment	38.02833N/122.37W	k__Bacteria (UID2495)	2993	147	91	62	83	2	0	0	0	59.9	1.65	50	d__Bacteria;p__Gemmatimonadota;c__Gemmatimonadetes;o__Longimicrobiales;f__UBA6960;g__;s__	N/A	N/A	N/A	N/A	N/A	N/A	N/A	N/A	N/A	N/A	d__Bacteria;p__Gemmatimonadota;c__Gemmatimonadetes;o__Longimicrobiales;f__UBA6960;g__;s__	taxonomic novelty determined using RED	N/A	N/A	46.69
GCA_029863525.1	13_May_SF_Bin45	Group4	N	Yes	Gemmatimonadetes	d__Bacteria;p__Gemmatimonadota;c__Gemmatimonadetes;o__Longimicrobiales;f__UBA6960;g__UBA2589;s__	N	3.62143	4.22029	221	88112	25079	66.47	3288	3621428	2042	16386.6	San Francisco Bay 13, USA	Coastal Sediment	38.02833N/122.37W	k__Bacteria (UID2495)	2993	147	91	29	110	8	0	0	0	85.81	6.17	0	d__Bacteria;p__Gemmatimonadota;c__Gemmatimonadetes;o__Longimicrobiales;f__UBA6960;g__UBA2589;s__	N/A	N/A	N/A	N/A	N/A	GCA_013002885.1	95	d__Bacteria;p__Gemmatimonadota;c__Gemmatimonadetes;o__Longimicrobiales;f__UBA6960;g__UBA2589;s__UBA2589 sp013002885	77.75	0.29	d__Bacteria;p__Gemmatimonadota;c__Gemmatimonadetes;o__Longimicrobiales;f__UBA6960;g__UBA2589;s__	taxonomic classification defined by topology and ANI	N/A	GCA_002390225.1, s__UBA2589 sp002390225, 95.0, 76.43, 0.18; GCA_002500925.1, s__UBA2589 sp002500925, 95.0, 76.07, 0.04; GCA_002348465.1, s__UBA2589 sp002348465, 95.0, 75.66, 0.05; GCA_002348265.1, s__UBA2589 sp002348265, 95.0, 75.58, 0.03	70.22
GCA_029863245.1	13_May_SF_Bin58	Group2	Y	Yes	Gemmatimonadetes	d__Bacteria;p__Gemmatimonadota;c__Gemmatimonadetes;o__Gemmatimonadales;f__GWC2-71-9;g__WVYX01;s__	Y	3.68413	3.72511	75	405315	96445	65.92	3382	3684134	2640	49121.8	San Francisco Bay 13, USA	Coastal Sediment	38.02833N/122.37W	k__Bacteria (UID2495)	2993	147	91	1	144	2	0	0	0	98.9	2.2	0	d__Bacteria;p__Gemmatimonadota;c__Gemmatimonadetes;o__Gemmatimonadales;f__GWC2-71-9;g__WVYX01;s__	N/A	N/A	N/A	N/A	N/A	GCA_011772755.1	95	d__Bacteria;p__Gemmatimonadota;c__Gemmatimonadetes;o__Gemmatimonadales;f__GWC2-71-9;g__WVYX01;s__WVYX01 sp011772755	76.69	0.12	d__Bacteria;p__Gemmatimonadota;c__Gemmatimonadetes;o__Gemmatimonadales;f__GWC2-71-9;g__;s__	taxonomic classification defined by topology and ANI	N/A	N/A	93.45
GCA_029863105.1	13_May_SF_Bin66	Group3	N	Yes	Gemmatimonadetes	d__Bacteria;p__Gemmatimonadota;c__Gemmatimonadetes;o__KS3-K002;f__JABDQB01;g__;s__	N	2.09989	2.6021	414	25656	5713	64.79	2314	2099894	2000	5072.2	San Francisco Bay 13, USA	Coastal Sediment	38.02833N/122.37W	k__Bacteria (UID2495)	2993	147	91	20	118	9	0	0	0	80.7	5.07	22.22	d__Bacteria;p__Gemmatimonadota;c__Gemmatimonadetes;o__KS3-K002;f__JABDQB01;g__;s__	N/A	N/A	N/A	N/A	N/A	GCA_013042495.1	95	d__Bacteria;p__Gemmatimonadota;c__Gemmatimonadetes;o__KS3-K002;f__JABDQB01;g__JABDQB01;s__JABDQB01 sp013042495	77.12	0.06	d__Bacteria;p__Gemmatimonadota;c__Gemmatimonadetes;o__KS3-K002;f__JABDQB01;g__;s__	taxonomic classification defined by topology and ANI	N/A	N/A	70.48
GCA_029862925.1	13_May_SF_Bin78	Group2	Y	Yes	Gemmatimonadetes	d__Bacteria;p__Gemmatimonadota;c__Gemmatimonadetes;o__Gemmatimonadales;f__GWC2-71-9;g__;s__	Y	3.49113	3.99352	290	90950	19320	70.2	3445	3491133	2010	12038.4	San Francisco Bay 13, USA	Coastal Sediment	38.02833N/122.37W	k__Bacteria (UID2495)	2993	147	91	15	129	3	0	0	0	87.42	3.3	0	d__Bacteria;p__Gemmatimonadota;c__Gemmatimonadetes;o__Gemmatimonadales;f__GWC2-71-9;g__;s__	N/A	N/A	N/A	N/A	N/A	N/A	N/A	N/A	N/A	N/A	d__Bacteria;p__Gemmatimonadota;c__Gemmatimonadetes;o__Gemmatimonadales;f__GWC2-71-9;g__;s__	taxonomic classification fully defined by topology	N/A	N/A	82.53
GCA_029862935.1	13_May_SF_Bin79	Group2	N	Yes	Gemmatimonadetes	d__Bacteria;p__Gemmatimonadota;c__Gemmatimonadetes;o__Gemmatimonadales;f__GWC2-71-9;g__WVYX01;s__	N	4.2493	4.86413	696	39420	7622	63.78	4424	4249302	2001	6105.3	San Francisco Bay 13, USA	Coastal Sediment	38.02833N/122.37W	k__Bacteria (UID2495)	2993	147	91	29	112	6	0	0	0	87.36	6.04	0	d__Bacteria;p__Gemmatimonadota;c__Gemmatimonadetes;o__Gemmatimonadales;f__GWC2-71-9;g__WVYX01;s__	N/A	N/A	N/A	N/A	N/A	GCA_011772755.1	95	d__Bacteria;p__Gemmatimonadota;c__Gemmatimonadetes;o__Gemmatimonadales;f__GWC2-71-9;g__WVYX01;s__WVYX01 sp011772755	76.08	0.08	d__Bacteria;p__Gemmatimonadota;c__Gemmatimonadetes;o__Gemmatimonadales;f__GWC2-71-9;g__;s__	taxonomic classification defined by topology and ANI	N/A	N/A	71.87
GCA_029862465.1	13_Oct_SF_Bin3	Group2	Y	Yes	Gemmatimonadetes	d__Bacteria;p__Gemmatimonadota;c__Gemmatimonadetes;o__Gemmatimonadales;f__GWC2-71-9;g__WVYX01;s__	N	3.4614	3.91075	576	36389	7459	65.88	3572	3461401	2001	6009.4	San Francisco Bay 13, USA	Coastal Sediment	38.02833N/122.37W	k__Bacteria (UID2495)	2993	147	91	16	126	5	0	0	0	88.51	1.46	0	d__Bacteria;p__Gemmatimonadota;c__Gemmatimonadetes;o__Gemmatimonadales;f__GWC2-71-9;g__WVYX01;s__	N/A	N/A	N/A	N/A	N/A	GCA_011772755.1	95	d__Bacteria;p__Gemmatimonadota;c__Gemmatimonadetes;o__Gemmatimonadales;f__GWC2-71-9;g__WVYX01;s__WVYX01 sp011772755	76.81	0.11	d__Bacteria;p__Gemmatimonadota;c__Gemmatimonadetes;o__Gemmatimonadales;f__GWC2-71-9;g__;s__	taxonomic classification defined by topology and ANI	N/A	N/A	77.7
GCA_029861425.1	21_Jan_SF_Bin74	Group3	N	Yes	Gemmatimonadetes	d__Bacteria;p__Gemmatimonadota;c__Gemmatimonadetes;o__KS3-K002;f__JABDQB01;g__;s__	N	3.85147	5.19486	291	52232	17096	66.99	3574	3851472	2086	13235.3	San Francisco Bay 13, USA	Coastal Sediment	37.788333N/122.358333W	k__Bacteria (UID203)	5449	104	58	54	50	0	0	0	0	74.14	0	0	d__Bacteria;p__Gemmatimonadota;c__Gemmatimonadetes;o__KS3-K002;f__JABDQB01;g__;s__	N/A	N/A	N/A	N/A	N/A	N/A	N/A	N/A	N/A	N/A	d__Bacteria;p__Gemmatimonadota;c__Gemmatimonadetes;o__KS3-K002;f__JABDQB01;g__;s__	taxonomic novelty determined using RED	N/A	N/A	66.69
GCA_029859185.1	4_1_Jan_SF_Bin35	Group2	N	Yes	Gemmatimonadetes	d__Bacteria;p__Gemmatimonadota;c__Gemmatimonadetes;o__Gemmatimonadales;f__GWC2-71-9;g__;s__	N	3.74947	5.10618	746	31747	6019	68.23	3863	3749471	2001	5026.1	San Francisco Bay 13, USA	Coastal Sediment	38.048333N/121.935W	k__Bacteria (UID2495)	2993	147	91	33	105	9	0	0	0	73.43	2.9	11.11	d__Bacteria;p__Gemmatimonadota;c__Gemmatimonadetes;o__Gemmatimonadales;f__GWC2-71-9;g__;s__	N/A	N/A	N/A	N/A	N/A	N/A	N/A	N/A	N/A	N/A	d__Bacteria;p__Gemmatimonadota;c__Gemmatimonadetes;o__Gemmatimonadales;f__GWC2-71-9;g__;s__	taxonomic classification fully defined by topology	N/A	N/A	67.34
GCA_029858725.1	4_1_Jan_SF_Bin65	Group2	Y	Yes	Gemmatimonadetes	d__Bacteria;p__Gemmatimonadota;c__Gemmatimonadetes;o__Gemmatimonadales;f__GWC2-71-9;g__;s__	N	2.8454	3.44898	642	23078	4727	69.13	3140	2845405	2003	4432.1	San Francisco Bay 13, USA	Coastal Sediment	38.048333N/121.935W	k__Bacteria (UID2495)	2993	147	91	19	122	6	0	0	0	82.5	4.46	16.67	d__Bacteria;p__Gemmatimonadota;c__Gemmatimonadetes;o__Gemmatimonadales;f__GWC2-71-9;g__;s__	N/A	N/A	N/A	N/A	N/A	N/A	N/A	N/A	N/A	N/A	d__Bacteria;p__Gemmatimonadota;c__Gemmatimonadetes;o__Gemmatimonadales;f__GWC2-71-9;g__;s__	taxonomic classification fully defined by topology	N/A	N/A	69.31
GCA_029865565.1	4_1_May_SF_Bin31	Group2	N	Yes	Gemmatimonadetes	d__Bacteria;p__Gemmatimonadota;c__Gemmatimonadetes;o__Gemmatimonadales;f__GWC2-71-9;g__;s__	N	2.17545	3.7111	605	17314	3740	69.16	2466	2175448	2000	3595.8	San Francisco Bay 13, USA	Coastal Sediment	38.048333N/121.935W	k__Bacteria (UID2495)	2993	147	91	63	78	6	0	0	0	58.62	3.95	0	d__Bacteria;p__Gemmatimonadota;c__Gemmatimonadetes;o__Gemmatimonadales;f__GWC2-71-9;g__;s__	N/A	N/A	N/A	N/A	N/A	N/A	N/A	N/A	N/A	N/A	d__Bacteria;p__Gemmatimonadota;c__Gemmatimonadetes;o__Gemmatimonadales;f__GWC2-71-9;g__;s__	taxonomic classification fully defined by topology	N/A	N/A	50.27
GCA_029865365.1	4_1_May_SF_Bin51	Group2	N	Yes	Gemmatimonadetes	d__Bacteria;p__Gemmatimonadota;c__Gemmatimonadetes;o__Gemmatimonadales;f__GWC2-71-9;g__;s__	N	2.78265	5.27317	726	19242	4028	68.29	3008	2782654	2000	3832.9	San Francisco Bay 13, USA	Coastal Sediment	38.048333N/121.935W	k__Bacteria (UID2495)	2993	147	91	71	74	2	0	0	0	52.77	1.2	0	d__Bacteria;p__Gemmatimonadota;c__Gemmatimonadetes;o__Gemmatimonadales;f__GWC2-71-9;g__;s__	N/A	N/A	N/A	N/A	N/A	N/A	N/A	N/A	N/A	N/A	d__Bacteria;p__Gemmatimonadota;c__Gemmatimonadetes;o__Gemmatimonadales;f__GWC2-71-9;g__;s__	taxonomic classification fully defined by topology	N/A	N/A	39.51
GCA_029884515.1	4_1_May_SF_Bin68	Group2	N	Yes	Gemmatimonadetes	d__Bacteria;p__Gemmatimonadota;c__Gemmatimonadetes;o__Gemmatimonadales;f__Gemmatimonadaceae;g__PNKF01;s__	N	2.73714	3.45468	548	28784	5639	70.96	2781	2737142	2003	4994.8	San Francisco Bay 13, USA	Coastal Sediment	38.048333N/121.935W	k__Bacteria (UID2495)	2993	147	91	33	112	2	0	0	0	79.23	1.65	50	d__Bacteria;p__Gemmatimonadota;c__Gemmatimonadetes;o__Gemmatimonadales;f__Gemmatimonadaceae;g__PNKF01;s__	N/A	N/A	N/A	N/A	N/A	GCA_011525845.1	95	d__Bacteria;p__Gemmatimonadota;c__Gemmatimonadetes;o__Gemmatimonadales;f__Gemmatimonadaceae;g__PNKF01;s__PNKF01 sp011525845	83.66	0.78	d__Bacteria;p__Gemmatimonadota;c__Gemmatimonadetes;o__Gemmatimonadales;f__Gemmatimonadaceae;g__PNKF01;s__	taxonomic classification defined by topology and ANI	N/A	GCA_902825965.1, s__PNKF01 sp902825965, 95.0, 80.3, 0.55; GCA_903906325.1, s__PNKF01 sp903906325, 95.0, 78.65, 0.39; GCA_013822285.1, s__PNKF01 sp013822285, 95.0, 78.07, 0.27	65.91
GCA_029884275.1	4_1_Oct_SF_Bin18	Group2	N	Yes	Gemmatimonadetes	d__Bacteria;p__Gemmatimonadota;c__Gemmatimonadetes;o__Gemmatimonadales;f__GWC2-71-9;g__;s__	N	2.65803	3.49189	579	26365	5118	69.26	2876	2658026	2001	4590.7	San Francisco Bay 13, USA	Coastal Sediment	38.048333N/121.935W	k__Bacteria (UID2495)	2993	147	91	32	108	7	0	0	0	76.12	2.7	42.86	d__Bacteria;p__Gemmatimonadota;c__Gemmatimonadetes;o__Gemmatimonadales;f__GWC2-71-9;g__;s__	N/A	N/A	N/A	N/A	N/A	N/A	N/A	N/A	N/A	N/A	d__Bacteria;p__Gemmatimonadota;c__Gemmatimonadetes;o__Gemmatimonadales;f__GWC2-71-9;g__;s__	taxonomic classification fully defined by topology	N/A	N/A	61.29
GCA_029884155.1	4_1_Oct_SF_Bin21	Group2	N	Yes	Gemmatimonadetes	d__Bacteria;p__Gemmatimonadota;c__Gemmatimonadetes;o__Gemmatimonadales;f__GWC2-71-9;g__SZUA-320;s__	N	1.70241	2.86843	487	34653	3601	68.69	1988	1702411	2001	3495.7	San Francisco Bay 13, USA	Coastal Sediment	38.048333N/121.935W	k__Bacteria (UID2495)	2993	147	91	49	88	9	1	0	0	59.35	4.9	8.33	d__Bacteria;p__Gemmatimonadota;c__Gemmatimonadetes;o__Gemmatimonadales;f__GWC2-71-9;g__SZUA-320;s__	N/A	N/A	N/A	N/A	N/A	GCA_003246755.1	95	d__Bacteria;p__Gemmatimonadota;c__Gemmatimonadetes;o__Gemmatimonadales;f__GWC2-71-9;g__SZUA-320;s__SZUA-320 sp003246755	76.72	0.12	d__Bacteria;p__Gemmatimonadota;c__Gemmatimonadetes;o__Gemmatimonadales;f__GWC2-71-9;g__;s__	taxonomic classification defined by topology and ANI	N/A	N/A	51.34
GCA_029883625.1	4_1_Oct_SF_Bin44	Group2	N	Yes	Gemmatimonadetes	d__Bacteria;p__Gemmatimonadota;c__Gemmatimonadetes;o__Gemmatimonadales;f__GWC2-71-9;g__;s__	N	3.70658	5.03406	734	29041	5727	68.2	3804	3706576	2001	5049.8	San Francisco Bay 13, USA	Coastal Sediment	38.048333N/121.935W	k__Bacteria (UID2495)	2993	147	91	28	113	6	0	0	0	73.63	5.59	33.33	d__Bacteria;p__Gemmatimonadota;c__Gemmatimonadetes;o__Gemmatimonadales;f__GWC2-71-9;g__;s__	N/A	N/A	N/A	N/A	N/A	N/A	N/A	N/A	N/A	N/A	d__Bacteria;p__Gemmatimonadota;c__Gemmatimonadetes;o__Gemmatimonadales;f__GWC2-71-9;g__;s__	taxonomic classification fully defined by topology	N/A	N/A	65.36
GCA_029881575.1	8_1_July_SF_Bin36	Group2	Y	Yes	Gemmatimonadetes	d__Bacteria;p__Gemmatimonadota;c__Gemmatimonadetes;o__Gemmatimonadales;f__GWC2-71-9;g__WVYX01;s__	Y	3.62702	3.88291	357	53862	14483	65.9	3556	3627022	2008	10159.7	San Francisco Bay 13, USA	Coastal Sediment	38.03N/122.151667W	k__Bacteria (UID2495)	2993	147	91	7	135	5	0	0	0	93.41	3.95	20	d__Bacteria;p__Gemmatimonadota;c__Gemmatimonadetes;o__Gemmatimonadales;f__GWC2-71-9;g__WVYX01;s__	N/A	N/A	N/A	N/A	N/A	GCA_011772755.1	95	d__Bacteria;p__Gemmatimonadota;c__Gemmatimonadetes;o__Gemmatimonadales;f__GWC2-71-9;g__WVYX01;s__WVYX01 sp011772755	76.56	0.12	d__Bacteria;p__Gemmatimonadota;c__Gemmatimonadetes;o__Gemmatimonadales;f__GWC2-71-9;g__;s__	taxonomic classification defined by topology and ANI	N/A	N/A	86.86
GCA_029881085.1	8_1_July_SF_Bin64	Group4	N	Yes	Gemmatimonadetes	d__Bacteria;p__Gemmatimonadota;c__Gemmatimonadetes;o__Longimicrobiales;f__UBA6960;g__SZUA-318;s__	N	2.84436	4.559	674	19376	4581	67.93	2943	2844363	2002	4220.1	San Francisco Bay 13, USA	Coastal Sediment	38.03N/122.151667W	k__Bacteria (UID2495)	2993	147	91	54	91	2	0	0	0	62.39	2.2	0	d__Bacteria;p__Gemmatimonadota;c__Gemmatimonadetes;o__Longimicrobiales;f__UBA6960;g__SZUA-318;s__	N/A	N/A	N/A	N/A	N/A	GCA_003248075.1	95	d__Bacteria;p__Gemmatimonadota;c__Gemmatimonadetes;o__Longimicrobiales;f__UBA6960;g__SZUA-318;s__SZUA-318 sp003248075	77.13	0.23	d__Bacteria;p__Gemmatimonadota;c__Gemmatimonadetes;o__Longimicrobiales;f__UBA6960;g__;s__	taxonomic classification defined by topology and ANI	N/A	N/A	61.21
GCA_029880825.1	8_1_May_SF_Bin5	Group2	N	Yes	Gemmatimonadetes	d__Bacteria;p__Gemmatimonadota;c__Gemmatimonadetes;o__Gemmatimonadales;f__GWC2-71-9;g__;s__	N	1.74725	3.04028	451	12205	3799	54.93	1906	1747250	2503	3874.2	San Francisco Bay 13, USA	Coastal Sediment	38.03N/122.151667W	k__Bacteria (UID2495)	2993	147	91	50	87	10	0	0	0	57.47	5	0	d__Bacteria;p__Gemmatimonadota;c__Gemmatimonadetes;o__Gemmatimonadales;f__GWC2-71-9;g__;s__	N/A	N/A	N/A	N/A	N/A	N/A	N/A	N/A	N/A	N/A	d__Bacteria;p__Gemmatimonadota;c__Gemmatimonadetes;o__Gemmatimonadales;f__GWC2-71-9;g__;s__	taxonomic classification fully defined by topology	N/A	N/A	48.14
GCA_029879725.1	8_1_Oct_SF_Bin61	Group4	Y	Yes	Gemmatimonadetes	d__Bacteria;p__Gemmatimonadota;c__Gemmatimonadetes;o__Longimicrobiales;f__UBA6960;g__SZUA-318;s__	Y	3.9433	4.0804	184	161719	36148	67.93	3467	3943298	2113	21431	San Francisco Bay 13, USA	Coastal Sediment	38.03N/122.151667W	k__Bacteria (UID2495)	2993	147	91	5	139	3	0	0	0	96.64	3.3	0	d__Bacteria;p__Gemmatimonadota;c__Gemmatimonadetes;o__Longimicrobiales;f__UBA6960;g__SZUA-318;s__	N/A	N/A	N/A	N/A	N/A	GCA_003248075.1	95	d__Bacteria;p__Gemmatimonadota;c__Gemmatimonadetes;o__Longimicrobiales;f__UBA6960;g__SZUA-318;s__SZUA-318 sp003248075	76.96	0.22	d__Bacteria;p__Gemmatimonadota;c__Gemmatimonadetes;o__Longimicrobiales;f__UBA6960;g__;s__	taxonomic classification defined by topology and ANI	N/A	N/A	89.24
GCA_029879255.1	8_1_Oct_SF_Bin91	Group2	N	Yes	Gemmatimonadetes	d__Bacteria;p__Gemmatimonadota;c__Gemmatimonadetes;o__Gemmatimonadales;f__GWC2-71-9;g__;s__	N	2.53318	3.30876	616	17668	4476	55.1	2690	2533184	2000	4112.3	San Francisco Bay 13, USA	Coastal Sediment	38.03N/122.151667W	k__Bacteria (UID2495)	2993	147	91	29	111	7	0	0	0	76.56	5.59	57.14	d__Bacteria;p__Gemmatimonadota;c__Gemmatimonadetes;o__Gemmatimonadales;f__GWC2-71-9;g__;s__	N/A	N/A	N/A	N/A	N/A	GCA_009692185.1	95	d__Bacteria;p__Gemmatimonadota;c__Gemmatimonadetes;o__Gemmatimonadales;f__GWC2-71-9;g__SHZT01;s__SHZT01 sp009692185	75.41	0.02	d__Bacteria;p__Gemmatimonadota;c__Gemmatimonadetes;o__Gemmatimonadales;f__GWC2-71-9;g__;s__	taxonomic classification defined by topology and ANI	N/A	N/A	70.28
	AB_03_Bin_204	Group2	N	Yes	Gemmatimonadetes	d__Bacteria;p__Gemmatimonadota;c__Gemmatimonadetes;o__Gemmatimonadales;f__GWC2-71-9;g__N074bin45;s__	N	2.94154	4.49502	632	45886	5189	63	3274	2941542	2002	4654.3	Guaymas Basin Aceto Balsamico, Mexico	Hydrothermal Vent Sediment	27.010833N/111.415556W	k__Bacteria (UID2495)	2993	147	91	37	108	2	0	0	0	65.44	1.2	100	d__Bacteria;p__Gemmatimonadota;c__Gemmatimonadetes;o__Gemmatimonadales;f__GWC2-71-9;g__N074bin45;s__	N/A	N/A	N/A	N/A	N/A	GCA_004357415.1	95	d__Bacteria;p__Gemmatimonadota;c__Gemmatimonadetes;o__Gemmatimonadales;f__GWC2-71-9;g__N074bin45;s__N074bin45 sp004357415	83.16	0.48	d__Bacteria;p__Gemmatimonadota;c__Gemmatimonadetes;o__Gemmatimonadales;f__GWC2-71-9;g__;s__	taxonomic classification defined by topology and ANI	N/A	N/A	56.26
	AB_03_Bin_29	Group2	N	Yes	Gemmatimonadetes	d__Bacteria;p__Gemmatimonadota;c__Gemmatimonadetes;o__Gemmatimonadales;f__GWC2-71-9;g__WVYX01;s__	N	2.8251	4.52668	715	19377	4274	60.73	3117	2825102	2000	3951.2	Guaymas Basin Aceto Balsamico, Mexico	Hydrothermal Vent Sediment	27.010833N/111.415556W	k__Bacteria (UID2495)	2993	147	91	47	98	2	0	0	0	62.41	2.2	0	d__Bacteria;p__Gemmatimonadota;c__Gemmatimonadetes;o__Gemmatimonadales;f__GWC2-71-9;g__WVYX01;s__	N/A	N/A	N/A	N/A	N/A	GCA_011772755.1	95	d__Bacteria;p__Gemmatimonadota;c__Gemmatimonadetes;o__Gemmatimonadales;f__GWC2-71-9;g__WVYX01;s__WVYX01 sp011772755	75.45	0.04	d__Bacteria;p__Gemmatimonadota;c__Gemmatimonadetes;o__Gemmatimonadales;f__GWC2-71-9;g__;s__	taxonomic classification defined by topology and ANI	N/A	N/A	59.3
	AB_03_Bin_91	Group3	Y	Yes	Gemmatimonadetes	d__Bacteria;p__Gemmatimonadota;c__Gemmatimonadetes;o__KS3-K002;f__JABDQB01;g__JABDQB01;s__	N	2.94319	3.22683	478	34549	7718	65.03	3032	2943189	2008	6157.3	Guaymas Basin Aceto Balsamico, Mexico	Hydrothermal Vent Sediment	27.010833N/111.415556W	k__Bacteria (UID2495)	2993	147	91	9	134	4	0	0	0	91.21	1.85	25	d__Bacteria;p__Gemmatimonadota;c__Gemmatimonadetes;o__KS3-K002;f__JABDQB01;g__JABDQB01;s__	N/A	N/A	N/A	N/A	N/A	GCA_013042495.1	95	d__Bacteria;p__Gemmatimonadota;c__Gemmatimonadetes;o__KS3-K002;f__JABDQB01;g__JABDQB01;s__JABDQB01 sp013042495	80.89	0.56	d__Bacteria;p__Gemmatimonadota;c__Gemmatimonadetes;o__KS3-K002;f__JABDQB01;g__;s__	taxonomic classification defined by topology and ANI	N/A	N/A	83.86
	AB_1215_Bin_106	Group3	N	Yes	Gemmatimonadetes	d__Bacteria;p__Gemmatimonadota;c__Gemmatimonadetes;o__KS3-K002;f__JABDQB01;g__JABDQB01;s__	N	2.67604	3.60798	707	25851	4001	65.02	3072	2676036	2000	3785.1	Guaymas Basin Aceto Balsamico, Mexico	Hydrothermal Vent Sediment	27.010833N/111.415556W	k__Bacteria (UID2495)	2993	147	91	42	89	15	1	0	0	74.17	7.76	83.33	d__Bacteria;p__Gemmatimonadota;c__Gemmatimonadetes;o__KS3-K002;f__JABDQB01;g__JABDQB01;s__	N/A	N/A	N/A	N/A	N/A	GCA_013042495.1	95	d__Bacteria;p__Gemmatimonadota;c__Gemmatimonadetes;o__KS3-K002;f__JABDQB01;g__JABDQB01;s__JABDQB01 sp013042495	78.3	0.3	d__Bacteria;p__Gemmatimonadota;c__Gemmatimonadetes;o__KS3-K002;f__JABDQB01;g__;s__	taxonomic classification defined by topology and ANI	N/A	N/A	57.02
	AB_1215_Bin_3	Group2	N	Yes	Gemmatimonadetes	d__Bacteria;p__Gemmatimonadota;c__Gemmatimonadetes;o__Gemmatimonadales;f__GWC2-71-9;g__N074bin45;s__	N	3.16168	4.57618	540	40788	7600	63.01	3336	3161685	2004	5855	Guaymas Basin Aceto Balsamico, Mexico	Hydrothermal Vent Sediment	27.010833N/111.415556W	k__Bacteria (UID2495)	2993	147	91	37	107	3	0	0	0	69.09	2.26	33.33	d__Bacteria;p__Gemmatimonadota;c__Gemmatimonadetes;o__Gemmatimonadales;f__GWC2-71-9;g__N074bin45;s__	N/A	N/A	N/A	N/A	N/A	GCA_004357415.1	95	d__Bacteria;p__Gemmatimonadota;c__Gemmatimonadetes;o__Gemmatimonadales;f__GWC2-71-9;g__N074bin45;s__N074bin45 sp004357415	83.39	0.62	d__Bacteria;p__Gemmatimonadota;c__Gemmatimonadetes;o__Gemmatimonadales;f__GWC2-71-9;g__;s__	taxonomic classification defined by topology and ANI	N/A	N/A	67.66
	AB_69_Bin_186	Group3	N	Yes	Gemmatimonadetes	d__Bacteria;p__Gemmatimonadota;c__Gemmatimonadetes;o__KS3-K002;f__JABDQB01;g__JABDQB01;s__	N	2.49346	3.28865	108	164785	37650	65.41	2307	2493456	2042	23087.6	Guaymas Basin Aceto Balsamico, Mexico	Hydrothermal Vent Sediment	27.010833N/111.415556W	k__Bacteria (UID2495)	2993	147	91	25	119	3	0	0	0	75.82	3.3	0	d__Bacteria;p__Gemmatimonadota;c__Gemmatimonadetes;o__KS3-K002;f__JABDQB01;g__JABDQB01;s__	N/A	N/A	N/A	N/A	N/A	GCA_013042495.1	95	d__Bacteria;p__Gemmatimonadota;c__Gemmatimonadetes;o__KS3-K002;f__JABDQB01;g__JABDQB01;s__JABDQB01 sp013042495	81.14	0.57	d__Bacteria;p__Gemmatimonadota;c__Gemmatimonadetes;o__KS3-K002;f__JABDQB01;g__;s__	taxonomic classification defined by topology and ANI	N/A	N/A	72.23
	AB_69_Bin_222	Group2	Y	Yes	Gemmatimonadetes	d__Bacteria;p__Gemmatimonadota;c__Gemmatimonadetes;o__Gemmatimonadales;f__GWC2-71-9;g__WVYX01;s__	Y	4.38501	4.58971	399	85218	19602	60.84	4230	4385009	2007	10990	Guaymas Basin Aceto Balsamico, Mexico	Hydrothermal Vent Sediment	27.010833N/111.415556W	k__Bacteria (UID2495)	2993	147	91	5	139	3	0	0	0	95.54	3.3	33.33	d__Bacteria;p__Gemmatimonadota;c__Gemmatimonadetes;o__Gemmatimonadales;f__GWC2-71-9;g__WVYX01;s__	N/A	N/A	N/A	N/A	N/A	GCA_011772755.1	95	d__Bacteria;p__Gemmatimonadota;c__Gemmatimonadetes;o__Gemmatimonadales;f__GWC2-71-9;g__WVYX01;s__WVYX01 sp011772755	75.54	0.05	d__Bacteria;p__Gemmatimonadota;c__Gemmatimonadetes;o__Gemmatimonadales;f__GWC2-71-9;g__;s__	taxonomic classification defined by topology and ANI	N/A	N/A	88.64
	AB_69_Bin_6	Group4	N	Yes	Gemmatimonadetes	d__Bacteria;p__Gemmatimonadota;c__Gemmatimonadetes;o__Longimicrobiales;f__UBA6960;g__;s__	N	2.44267	4.26221	805	13862	2950	64.44	2747	2442672	2000	3034.4	Guaymas Basin Aceto Balsamico, Mexico	Hydrothermal Vent Sediment	27.010833N/111.415556W	k__Bacteria (UID2495)	2993	147	91	64	74	8	1	0	0	57.31	7.89	0	d__Bacteria;p__Gemmatimonadota;c__Gemmatimonadetes;o__Longimicrobiales;f__UBA6960;g__;s__	N/A	N/A	N/A	N/A	N/A	N/A	N/A	N/A	N/A	N/A	d__Bacteria;p__Gemmatimonadota;c__Gemmatimonadetes;o__Longimicrobiales;f__UBA6960;g__;s__	taxonomic classification fully defined by topology	N/A	N/A	45.3
	BHB10-26_Bin_100	Group2	Y	Yes	Gemmatimonadetes	d__Bacteria;p__Gemmatimonadota;c__Gemmatimonadetes;o__Gemmatimonadales;f__GWC2-71-9;g__WVYX01;s__	N	3.56352	3.64368	155	168413	64768	66.1	3311	3563515	2001	22990.4	Bohai Sea BHB10, China	Coastal Sediment	38.75N/118.1533E	k__Bacteria (UID2495)	2993	147	91	2	142	3	0	0	0	97.8	2.38	0	d__Bacteria;p__Gemmatimonadota;c__Gemmatimonadetes;o__Gemmatimonadales;f__GWC2-71-9;g__WVYX01;s__	N/A	N/A	N/A	N/A	N/A	GCA_011772755.1	95	d__Bacteria;p__Gemmatimonadota;c__Gemmatimonadetes;o__Gemmatimonadales;f__GWC2-71-9;g__WVYX01;s__WVYX01 sp011772755	76.63	0.15	d__Bacteria;p__Gemmatimonadota;c__Gemmatimonadetes;o__Gemmatimonadales;f__GWC2-71-9;g__;s__	taxonomic classification defined by topology and ANI	N/A	N/A	91.3
	BHB10-26_Bin_103	Group3	Y	Yes	Gemmatimonadetes	d__Bacteria;p__Gemmatimonadota;c__Gemmatimonadetes;o__KS3-K002;f__JABDQB01;g__;s__	Y	4.2101	4.40387	334	123461	25304	64.74	3941	4210099	2003	12605.1	Bohai Sea BHB10, China	Coastal Sediment	38.75N/118.1533E	k__Bacteria (UID2495)	2993	147	91	4	139	4	0	0	0	95.6	4.4	25	d__Bacteria;p__Gemmatimonadota;c__Gemmatimonadetes;o__KS3-K002;f__JABDQB01;g__;s__	N/A	N/A	N/A	N/A	N/A	N/A	N/A	N/A	N/A	N/A	d__Bacteria;p__Gemmatimonadota;c__Gemmatimonadetes;o__KS3-K002;f__JABDQB01;g__;s__	taxonomic novelty determined using RED	N/A	N/A	89.86
	BHB10-26_Bin_128	Group3	N	Yes	Gemmatimonadetes	d__Bacteria;p__Gemmatimonadota;c__Gemmatimonadetes;o__KS3-K002;f__KS3-K002;g__KS3-K002;s__	N	4.29365	4.54307	324	143884	31031	66.06	4066	4293654	2001	13252	Bohai Sea BHB10, China	Coastal Sediment	38.75N/118.1533E	k__Bacteria (UID2495)	2993	147	91	5	132	10	0	0	0	94.51	9.34	20	d__Bacteria;p__Gemmatimonadota;c__Gemmatimonadetes;o__KS3-K002;f__KS3-K002;g__KS3-K002;s__	N/A	N/A	N/A	N/A	N/A	GCA_011774835.1	95	d__Bacteria;p__Gemmatimonadota;c__Gemmatimonadetes;o__KS3-K002;f__KS3-K002;g__KS3-K002;s__KS3-K002 sp011774835	77.91	0.31	d__Bacteria;p__Gemmatimonadota;c__Gemmatimonadetes;o__KS3-K002;f__;g__;s__	taxonomic classification defined by topology and ANI	N/A	N/A	82.93
	BHB10-26_Bin_129	Group4	N	Yes	Gemmatimonadetes	d__Bacteria;p__Gemmatimonadota;c__Gemmatimonadetes;o__Longimicrobiales;f__UBA6960;g__UBA2589;s__	N	4.22582	6.77758	1131	35220	3690	67.38	4563	4225819	2000	3736.4	Bohai Sea BHB10, China	Coastal Sediment	38.75N/118.1533E	k__Bacteria (UID2495)	2993	147	91	54	86	7	0	0	0	62.35	4.15	42.86	d__Bacteria;p__Gemmatimonadota;c__Gemmatimonadetes;o__Longimicrobiales;f__UBA6960;g__UBA2589;s__	N/A	N/A	N/A	N/A	N/A	N/A	N/A	N/A	N/A	N/A	d__Bacteria;p__Gemmatimonadota;c__Gemmatimonadetes;o__Longimicrobiales;f__UBA6960;g__UBA2589;s__	ANI	N/A	GCA_013002885.1, s__UBA2589 sp013002885, 95.0, 77.38, 0.18; GCA_002390225.1, s__UBA2589 sp002390225, 95.0, 77.21, 0.14; GCA_002348265.1, s__UBA2589 sp002348265, 95.0, 76.69, 0.02; GCA_002348465.1, s__UBA2589 sp002348465, 95.0, 76.67, 0.03; GCA_002500925.1, s__UBA2589 sp002500925, 95.0, 76.58, 0.03	50.09
	BHB10-26_Bin_141	Group4	N	Yes	Gemmatimonadetes	d__Bacteria;p__Gemmatimonadota;c__Gemmatimonadetes;o__Longimicrobiales;f__UBA6960;g__;s__	N	4.31242	5.00804	425	89158	19945	68.3	3874	4312420	2011	10146.9	Bohai Sea BHB10, China	Coastal Sediment	38.75N/118.1533E	k__Bacteria (UID2495)	2993	147	91	35	106	6	0	0	0	86.11	6.59	0	d__Bacteria;p__Gemmatimonadota;c__Gemmatimonadetes;o__Longimicrobiales;f__UBA6960;g__;s__	N/A	N/A	N/A	N/A	N/A	GCA_002346665.1	95	d__Bacteria;p__Gemmatimonadota;c__Gemmatimonadetes;o__Longimicrobiales;f__UBA6960;g__UBA2988;s__UBA2988 sp002346665	75.79	0.02	d__Bacteria;p__Gemmatimonadota;c__Gemmatimonadetes;o__Longimicrobiales;f__UBA6960;g__;s__	taxonomic classification defined by topology and ANI	N/A	N/A	71.51
	BHB10-26_Bin_152	Group4	Y	Yes	Gemmatimonadetes	d__Bacteria;p__Gemmatimonadota;c__Gemmatimonadetes;o__Longimicrobiales;f__UBA6960;g__JABDNZ01;s__	N	4.81394	5.69159	845	28323	6879	62.97	4643	4813944	2001	5697	Bohai Sea BHB10, China	Coastal Sediment	38.75N/118.1533E	k__Bacteria (UID2495)	2993	147	91	28	116	3	0	0	0	84.58	3.3	0	d__Bacteria;p__Gemmatimonadota;c__Gemmatimonadetes;o__Longimicrobiales;f__UBA6960;g__JABDNZ01;s__	N/A	N/A	N/A	N/A	N/A	GCA_013043565.1	95	d__Bacteria;p__Gemmatimonadota;c__Gemmatimonadetes;o__Longimicrobiales;f__UBA6960;g__JABDNZ01;s__JABDNZ01 sp013043565	76.74	0.14	d__Bacteria;p__Gemmatimonadota;c__Gemmatimonadetes;o__Longimicrobiales;f__UBA6960;g__;s__	taxonomic classification defined by topology and ANI	N/A	N/A	74.03
	BHB10-26_Bin_154	Group3	N	Yes	Gemmatimonadetes	d__Bacteria;p__Gemmatimonadota;c__Gemmatimonadetes;o__KS3-K002;f__JABDQB01;g__;s__	N	3.57558	4.80202	471	65435	12286	66	3476	3575584	2000	7591.5	Bohai Sea BHB10, China	Coastal Sediment	38.75N/118.1533E	k__Bacteria (UID2495)	2993	147	91	32	108	7	0	0	0	74.46	7.14	14.29	d__Bacteria;p__Gemmatimonadota;c__Gemmatimonadetes;o__KS3-K002;f__JABDQB01;g__;s__	N/A	N/A	N/A	N/A	N/A	N/A	N/A	N/A	N/A	N/A	d__Bacteria;p__Gemmatimonadota;c__Gemmatimonadetes;o__KS3-K002;f__JABDQB01;g__;s__	taxonomic novelty determined using RED	N/A	N/A	66.29
	BHB10-26_Bin_158	Group3	N	Yes	Gemmatimonadetes	d__Bacteria;p__Gemmatimonadota;c__Gemmatimonadetes;o__KS3-K002;f__KS3-K002;g__KS3-K002;s__	N	3.6422	4.84206	402	49128	12723	66.29	3533	3642197	2001	9060.2	Bohai Sea BHB10, China	Coastal Sediment	38.75N/118.1533E	k__Bacteria (UID2495)	2993	147	91	38	101	7	1	0	0	75.22	9.34	10	d__Bacteria;p__Gemmatimonadota;c__Gemmatimonadetes;o__KS3-K002;f__KS3-K002;g__KS3-K002;s__	N/A	N/A	N/A	N/A	N/A	GCA_011774835.1	95	d__Bacteria;p__Gemmatimonadota;c__Gemmatimonadetes;o__KS3-K002;f__KS3-K002;g__KS3-K002;s__KS3-K002 sp011774835	78.5	0.35	d__Bacteria;p__Gemmatimonadota;c__Gemmatimonadetes;o__KS3-K002;f__;g__;s__	taxonomic classification defined by topology and ANI	N/A	N/A	63.87
	BHB10-26_Bin_177	Group4	N	Yes	Gemmatimonadetes	d__Bacteria;p__Gemmatimonadota;c__Gemmatimonadetes;o__Longimicrobiales;f__UBA6960;g__;s__	N	3.98065	5.61922	938	17351	4720	67.34	4144	3980653	2001	4243.8	Bohai Sea BHB10, China	Coastal Sediment	38.75N/118.1533E	k__Bacteria (UID2495)	2993	147	91	38	100	8	1	0	0	70.84	6.04	9.09	d__Bacteria;p__Gemmatimonadota;c__Gemmatimonadetes;o__Longimicrobiales;f__UBA6960;g__;s__	N/A	N/A	N/A	N/A	N/A	N/A	N/A	N/A	N/A	N/A	d__Bacteria;p__Gemmatimonadota;c__Gemmatimonadetes;o__Longimicrobiales;f__UBA6960;g__;s__	taxonomic classification fully defined by topology	N/A	N/A	55.85
	BHB10-26_Bin_194	Group3	N	Yes	Gemmatimonadetes	d__Bacteria;p__Gemmatimonadota;c__Gemmatimonadetes;o__KS3-K002;f__KS3-K002;g__;s__	N	3.34215	5.69846	913	14310	3821	63.6	3542	3342146	2000	3660.6	Bohai Sea BHB10, China	Coastal Sediment	38.75N/118.1533E	k__Bacteria (UID2495)	2993	147	91	56	85	6	0	0	0	58.65	5.86	33.33	d__Bacteria;p__Gemmatimonadota;c__Gemmatimonadetes;o__KS3-K002;f__KS3-K002;g__;s__	N/A	N/A	N/A	N/A	N/A	GCA_011774835.1	95	d__Bacteria;p__Gemmatimonadota;c__Gemmatimonadetes;o__KS3-K002;f__KS3-K002;g__KS3-K002;s__KS3-K002 sp011774835	76.55	0.15	d__Bacteria;p__Gemmatimonadota;c__Gemmatimonadetes;o__KS3-K002;f__;g__;s__	taxonomic classification defined by topology and ANI	N/A	N/A	48.84
	BHB10-26_Bin_197	Group2	Y	Yes	Gemmatimonadetes	d__Bacteria;p__Gemmatimonadota;c__Gemmatimonadetes;o__Gemmatimonadales;f__GWC2-71-9;g__WVYX01;s__	N	3.23515	3.40865	130	181869	49391	67.68	3042	3235145	2018	24885.7	Bohai Sea BHB10, China	Coastal Sediment	38.75N/118.1533E	k__Bacteria (UID2495)	2993	147	91	11	133	2	1	0	0	94.91	4.4	0	d__Bacteria;p__Gemmatimonadota;c__Gemmatimonadetes;o__Gemmatimonadales;f__GWC2-71-9;g__WVYX01;s__	N/A	N/A	N/A	N/A	N/A	GCA_011772755.1	95	d__Bacteria;p__Gemmatimonadota;c__Gemmatimonadetes;o__Gemmatimonadales;f__GWC2-71-9;g__WVYX01;s__WVYX01 sp011772755	76.64	0.23	d__Bacteria;p__Gemmatimonadota;c__Gemmatimonadetes;o__Gemmatimonadales;f__GWC2-71-9;g__;s__	taxonomic classification defined by topology and ANI	N/A	N/A	85.53
	BHB10-26_Bin_220	Group3	Y	Yes	Gemmatimonadetes	d__Bacteria;p__Gemmatimonadota;c__Gemmatimonadetes;o__KS3-K002;f__JABDQB01;g__JABDQB01;s__	N	3.10017	3.24625	283	69583	15296	66.74	3036	3100166	2058	10954.7	Bohai Sea BHB10, China	Coastal Sediment	38.75N/118.1533E	k__Bacteria (UID2495)	2993	147	91	5	139	3	0	0	0	95.5	3.3	0	d__Bacteria;p__Gemmatimonadota;c__Gemmatimonadetes;o__KS3-K002;f__JABDQB01;g__JABDQB01;s__	N/A	N/A	N/A	N/A	N/A	GCA_013042495.1	95	d__Bacteria;p__Gemmatimonadota;c__Gemmatimonadetes;o__KS3-K002;f__JABDQB01;g__JABDQB01;s__JABDQB01 sp013042495	77.86	0.27	d__Bacteria;p__Gemmatimonadota;c__Gemmatimonadetes;o__KS3-K002;f__JABDQB01;g__;s__	taxonomic classification defined by topology and ANI	N/A	N/A	89.62
	BHB10-26_Bin_233	Group2	Y	Yes	Gemmatimonadetes	d__Bacteria;p__Gemmatimonadota;c__Gemmatimonadetes;o__Gemmatimonadales;f__GWC2-71-9;g__WVYX01;s__	N	3.45054	3.7604	342	71868	14672	65.66	3343	3450542	2006	10089.3	Bohai Sea BHB10, China	Coastal Sediment	38.75N/118.1533E	k__Bacteria (UID2495)	2993	147	91	8	137	2	0	0	0	91.76	2.2	0	d__Bacteria;p__Gemmatimonadota;c__Gemmatimonadetes;o__Gemmatimonadales;f__GWC2-71-9;g__WVYX01;s__	N/A	N/A	N/A	N/A	N/A	GCA_011772755.1	95	d__Bacteria;p__Gemmatimonadota;c__Gemmatimonadetes;o__Gemmatimonadales;f__GWC2-71-9;g__WVYX01;s__WVYX01 sp011772755	75.77	0.09	d__Bacteria;p__Gemmatimonadota;c__Gemmatimonadetes;o__Gemmatimonadales;f__GWC2-71-9;g__;s__	taxonomic classification defined by topology and ANI	N/A	N/A	86.18
	BHB10-26_Bin_242	Group3	N	Yes	Gemmatimonadetes	d__Bacteria;p__Gemmatimonadota;c__Gemmatimonadetes;o__KS3-K002;f__JABDQB01;g__JABDQB01;s__	N	3.32695	3.40179	422	84511	10449	65.68	3384	3326954	2007	7883.8	Bohai Sea BHB10, China	Coastal Sediment	38.75N/118.1533E	k__Bacteria (UID2495)	2993	147	91	2	140	5	0	0	0	97.8	5.49	20	d__Bacteria;p__Gemmatimonadota;c__Gemmatimonadetes;o__KS3-K002;f__JABDQB01;g__JABDQB01;s__	N/A	N/A	N/A	N/A	N/A	GCA_013042495.1	95	d__Bacteria;p__Gemmatimonadota;c__Gemmatimonadetes;o__KS3-K002;f__JABDQB01;g__JABDQB01;s__JABDQB01 sp013042495	79.84	0.55	d__Bacteria;p__Gemmatimonadota;c__Gemmatimonadetes;o__KS3-K002;f__JABDQB01;g__;s__	taxonomic classification defined by topology and ANI	N/A	N/A	88.86
	BHB10-26_Bin_255	Group3	N	Yes	Gemmatimonadetes	d__Bacteria;p__Gemmatimonadota;c__Gemmatimonadetes;o__KS3-K002;f__JABDQB01;g__;s__	N	4.22629	4.83115	475	67785	12668	66.82	4062	4226290	2004	8897.5	Bohai Sea BHB10, China	Coastal Sediment	38.75N/118.1533E	k__Bacteria (UID2495)	2993	147	91	14	125	8	0	0	0	87.48	7.14	25	d__Bacteria;p__Gemmatimonadota;c__Gemmatimonadetes;o__KS3-K002;f__JABDQB01;g__;s__	N/A	N/A	N/A	N/A	N/A	N/A	N/A	N/A	N/A	N/A	d__Bacteria;p__Gemmatimonadota;c__Gemmatimonadetes;o__KS3-K002;f__JABDQB01;g__;s__	taxonomic novelty determined using RED	N/A	N/A	78.1
	BHB10-26_Bin_262	Group2	Y	Yes	Gemmatimonadetes	d__Bacteria;p__Gemmatimonadota;c__Gemmatimonadetes;o__Gemmatimonadales;f__GWC2-71-9;g__WVYX01;s__	N	3.0963	3.13074	69	258263	106518	67.15	2885	3096302	2303	44873.9	Bohai Sea BHB10, China	Coastal Sediment	38.75N/118.1533E	k__Bacteria (UID2495)	2993	147	91	1	144	2	0	0	0	98.9	2.2	0	d__Bacteria;p__Gemmatimonadota;c__Gemmatimonadetes;o__Gemmatimonadales;f__GWC2-71-9;g__WVYX01;s__	N/A	N/A	N/A	N/A	N/A	GCA_011772755.1	95	d__Bacteria;p__Gemmatimonadota;c__Gemmatimonadetes;o__Gemmatimonadales;f__GWC2-71-9;g__WVYX01;s__WVYX01 sp011772755	76.89	0.21	d__Bacteria;p__Gemmatimonadota;c__Gemmatimonadetes;o__Gemmatimonadales;f__GWC2-71-9;g__;s__	taxonomic classification defined by topology and ANI	N/A	N/A	91.42
	BHB10-26_Bin_292	Group3	Y	Yes	Gemmatimonadetes	d__Bacteria;p__Gemmatimonadota;c__Gemmatimonadetes;o__KS3-K002;f__KS3-K002;g__KS3-K002;s__	N	4.67518	4.83472	107	210668	84371	62.22	4082	4675178	2751	43693.3	Bohai Sea BHB10, China	Coastal Sediment	38.75N/118.1533E	k__Bacteria (UID2495)	2993	147	91	3	141	3	0	0	0	96.7	3.3	0	d__Bacteria;p__Gemmatimonadota;c__Gemmatimonadetes;o__KS3-K002;f__KS3-K002;g__KS3-K002;s__	N/A	N/A	N/A	N/A	N/A	GCA_011774835.1	95	d__Bacteria;p__Gemmatimonadota;c__Gemmatimonadetes;o__KS3-K002;f__KS3-K002;g__KS3-K002;s__KS3-K002 sp011774835	77.38	0.29	d__Bacteria;p__Gemmatimonadota;c__Gemmatimonadetes;o__KS3-K002;f__;g__;s__	taxonomic classification defined by topology and ANI	N/A	N/A	89.93
	BHB10-26_Bin_314	Group2	N	Yes	Gemmatimonadetes	d__Bacteria;p__Gemmatimonadota;c__Gemmatimonadetes;o__Gemmatimonadales;f__GWC2-71-9;g__WVYX01;s__	N	3.28448	3.7117	415	54259	10314	67.45	3303	3284481	2042	7914.4	Bohai Sea BHB10, China	Coastal Sediment	38.75N/118.1533E	k__Bacteria (UID2495)	2993	147	91	20	121	6	0	0	0	88.49	5.04	83.33	d__Bacteria;p__Gemmatimonadota;c__Gemmatimonadetes;o__Gemmatimonadales;f__GWC2-71-9;g__WVYX01;s__	N/A	N/A	N/A	N/A	N/A	GCA_011772755.1	95	d__Bacteria;p__Gemmatimonadota;c__Gemmatimonadetes;o__Gemmatimonadales;f__GWC2-71-9;g__WVYX01;s__WVYX01 sp011772755	77	0.21	d__Bacteria;p__Gemmatimonadota;c__Gemmatimonadetes;o__Gemmatimonadales;f__GWC2-71-9;g__;s__	taxonomic classification defined by topology and ANI	N/A	N/A	74.27
	BHB10-26_Bin_323	Group3	Y	Yes	Gemmatimonadetes	d__Bacteria;p__Gemmatimonadota;c__Gemmatimonadetes;o__KS3-K002;f__KS3-K002;g__KS3-K002;s__	N	4.33765	4.54014	170	174397	44132	64.44	3902	4337652	2098	25515.6	Bohai Sea BHB10, China	Coastal Sediment	38.75N/118.1533E	k__Bacteria (UID2495)	2993	147	91	5	139	3	0	0	0	95.54	3.3	0	d__Bacteria;p__Gemmatimonadota;c__Gemmatimonadetes;o__KS3-K002;f__KS3-K002;g__KS3-K002;s__	N/A	N/A	N/A	N/A	N/A	GCA_011774835.1	95	d__Bacteria;p__Gemmatimonadota;c__Gemmatimonadetes;o__KS3-K002;f__KS3-K002;g__KS3-K002;s__KS3-K002 sp011774835	77.52	0.28	d__Bacteria;p__Gemmatimonadota;c__Gemmatimonadetes;o__KS3-K002;f__;g__;s__	taxonomic classification defined by topology and ANI	N/A	N/A	89.58
	BHB10-26_Bin_326	Group4	N	Yes	Gemmatimonadetes	d__Bacteria;p__Gemmatimonadota;c__Gemmatimonadetes;o__Longimicrobiales;f__UBA6960;g__UBA2982;s__	N	3.11741	3.70151	687	19738	5141	66.53	3414	3117413	2002	4537.7	Bohai Sea BHB10, China	Coastal Sediment	38.75N/118.1533E	k__Bacteria (UID2495)	2993	147	91	20	117	9	1	0	0	84.22	7.44	8.33	d__Bacteria;p__Gemmatimonadota;c__Gemmatimonadetes;o__Longimicrobiales;f__UBA6960;g__UBA2982;s__	N/A	N/A	N/A	N/A	N/A	GCA_009692205.1	95	d__Bacteria;p__Gemmatimonadota;c__Gemmatimonadetes;o__Longimicrobiales;f__UBA6960;g__UBA2982;s__UBA2982 sp009692205	77.16	0.22	d__Bacteria;p__Gemmatimonadota;c__Gemmatimonadetes;o__Longimicrobiales;f__UBA6960;g__UBA2982;s__	taxonomic classification defined by topology and ANI	N/A	GCA_002347035.1, s__UBA2982 sp002347035, 95.0, 76.39, 0.03	67.1
	BHB10-26_Bin_344	Group4	Y	Yes	Gemmatimonadetes	d__Bacteria;p__Gemmatimonadota;c__Gemmatimonadetes;o__Longimicrobiales;f__UBA6960;g__SZUA-318;s__	N	5.32301	5.68515	633	55689	11360	68.21	4984	5323008	2011	8409.2	Bohai Sea BHB10, China	Coastal Sediment	38.75N/118.1533E	k__Bacteria (UID2495)	2993	147	91	10	133	4	0	0	0	93.63	3.85	25	d__Bacteria;p__Gemmatimonadota;c__Gemmatimonadetes;o__Longimicrobiales;f__UBA6960;g__SZUA-318;s__	N/A	N/A	N/A	N/A	N/A	GCA_003248075.1	95	d__Bacteria;p__Gemmatimonadota;c__Gemmatimonadetes;o__Longimicrobiales;f__UBA6960;g__SZUA-318;s__SZUA-318 sp003248075	76.93	0.22	d__Bacteria;p__Gemmatimonadota;c__Gemmatimonadetes;o__Longimicrobiales;f__UBA6960;g__;s__	taxonomic classification defined by topology and ANI	N/A	N/A	82.95
	BHB10-26_Bin_357	Group3	N	Yes	Gemmatimonadetes	d__Bacteria;p__Gemmatimonadota;c__Gemmatimonadetes;o__KS3-K002;f__;g__;s__	N	3.24289	3.49224	305	77646	16292	65.88	3189	3242893	2052	10632.4	Bohai Sea BHB10, China	Coastal Sediment	38.75N/118.1533E	k__Bacteria (UID2495)	2993	147	91	7	135	5	0	0	0	92.86	5.49	40	d__Bacteria;p__Gemmatimonadota;c__Gemmatimonadetes;o__KS3-K002;f__;g__;s__	N/A	N/A	N/A	N/A	N/A	N/A	N/A	N/A	N/A	N/A	d__Bacteria;p__Gemmatimonadota;c__Gemmatimonadetes;o__KS3-K002;f__;g__;s__	taxonomic novelty determined using RED	N/A	N/A	82.03
	BHB10-26_Bin_365	Group4	Y	Yes	Gemmatimonadetes	d__Bacteria;p__Gemmatimonadota;c__Gemmatimonadetes;o__Longimicrobiales;f__UBA6960;g__;s__	Y	3.52181	3.60472	292	81905	20309	66.92	3257	3521813	2036	12061	Bohai Sea BHB10, China	Coastal Sediment	38.75N/118.1533E	k__Bacteria (UID2495)	2993	147	91	3	141	3	0	0	0	97.7	3.3	0	d__Bacteria;p__Gemmatimonadota;c__Gemmatimonadetes;o__Longimicrobiales;f__UBA6960;g__;s__	N/A	N/A	N/A	N/A	N/A	N/A	N/A	N/A	N/A	N/A	d__Bacteria;p__Gemmatimonadota;c__Gemmatimonadetes;o__Longimicrobiales;f__UBA6960;g__;s__	taxonomic classification fully defined by topology	N/A	N/A	88.01
	BHB10-26_Bin_371	Group1	N	Yes	Gemmatimonadetes	d__Bacteria;p__Gemmatimonadota;c__Gemmatimonadetes;o__JACCXV01;f__;g__;s__	N	1.91732	2.43563	436	16836	4742	62.23	2247	1917325	2002	4397.5	Bohai Sea BHB10, China	Coastal Sediment	38.75N/118.1533E	k__Bacteria (UID2495)	2993	147	91	30	114	3	0	0	0	78.72	2.3	0	d__Bacteria;p__Gemmatimonadota;c__Gemmatimonadetes;o__JACCXV01;f__;g__;s__	N/A	N/A	N/A	N/A	N/A	GCA_013696835.1	95	d__Bacteria;p__Gemmatimonadota;c__Gemmatimonadetes;o__JACCXV01;f__JACCXV01;g__JACCXV01;s__JACCXV01 sp013696835	75.37	0.03	d__Bacteria;p__Gemmatimonadota;c__Gemmatimonadetes;o__;f__;g__;s__	taxonomic classification defined by topology and ANI	N/A	N/A	68.97
	BHB10-26_Bin_372	Group2	Y	Yes	Gemmatimonadetes	d__Bacteria;p__Gemmatimonadota;c__Gemmatimonadetes;o__Gemmatimonadales;f__GWC2-71-9;g__WVYX01;s__	N	3.2589	3.47098	331	88067	15536	67.29	3246	3258902	2016	9845.6	Bohai Sea BHB10, China	Coastal Sediment	38.75N/118.1533E	k__Bacteria (UID2495)	2993	147	91	10	133	4	0	0	0	93.89	3.36	25	d__Bacteria;p__Gemmatimonadota;c__Gemmatimonadetes;o__Gemmatimonadales;f__GWC2-71-9;g__WVYX01;s__	N/A	N/A	N/A	N/A	N/A	GCA_011772755.1	95	d__Bacteria;p__Gemmatimonadota;c__Gemmatimonadetes;o__Gemmatimonadales;f__GWC2-71-9;g__WVYX01;s__WVYX01 sp011772755	77.01	0.24	d__Bacteria;p__Gemmatimonadota;c__Gemmatimonadetes;o__Gemmatimonadales;f__GWC2-71-9;g__;s__	taxonomic classification defined by topology and ANI	N/A	N/A	85.86
	BHB10-26_Bin_89	Group4	Y	Yes	Gemmatimonadetes	d__Bacteria;p__Gemmatimonadota;c__Gemmatimonadetes;o__Longimicrobiales;f__UBA6960;g__;s__	Y	4.3696	4.4182	167	302812	68984	68.25	3789	4369604	2009	26165.3	Bohai Sea BHB10, China	Coastal Sediment	38.75N/118.1533E	k__Bacteria (UID2495)	2993	147	91	1	142	4	0	0	0	98.9	4.4	25	d__Bacteria;p__Gemmatimonadota;c__Gemmatimonadetes;o__Longimicrobiales;f__UBA6960;g__;s__	N/A	N/A	N/A	N/A	N/A	GCA_002346665.1	95	d__Bacteria;p__Gemmatimonadota;c__Gemmatimonadetes;o__Longimicrobiales;f__UBA6960;g__UBA2988;s__UBA2988 sp002346665	76.23	0.04	d__Bacteria;p__Gemmatimonadota;c__Gemmatimonadetes;o__Longimicrobiales;f__UBA6960;g__;s__	taxonomic classification defined by topology and ANI	N/A	N/A	89.74
	BHB10-26_Bin_91	Group4	Y	Yes	Gemmatimonadetes	d__Bacteria;p__Gemmatimonadota;c__Gemmatimonadetes;o__Longimicrobiales;f__UBA6960;g__;s__	N	6.24823	6.31773	368	191109	41460	67.73	5555	6248234	2009	16978.9	Bohai Sea BHB10, China	Coastal Sediment	38.75N/118.1533E	k__Bacteria (UID2495)	2993	147	91	1	143	3	0	0	0	98.9	3.3	0	d__Bacteria;p__Gemmatimonadota;c__Gemmatimonadetes;o__Longimicrobiales;f__UBA6960;g__;s__	N/A	N/A	N/A	N/A	N/A	N/A	N/A	N/A	N/A	N/A	d__Bacteria;p__Gemmatimonadota;c__Gemmatimonadetes;o__Longimicrobiales;f__UBA6960;g__;s__	taxonomic classification fully defined by topology	N/A	N/A	88.33
	BHB10-2_Bin_101	Group2	Y	Yes	Gemmatimonadetes	d__Bacteria;p__Gemmatimonadota;c__Gemmatimonadetes;o__Gemmatimonadales;f__GWC2-71-9;g__WVYX01;s__	N	3.3946	3.99177	429	57166	10083	65.68	3380	3394605	2001	7912.8	Bohai Sea BHB10, China	Coastal Sediment	38.75N/118.1533E	k__Bacteria (UID2495)	2993	147	91	16	129	2	0	0	0	85.04	2.2	0	d__Bacteria;p__Gemmatimonadota;c__Gemmatimonadetes;o__Gemmatimonadales;f__GWC2-71-9;g__WVYX01;s__	N/A	N/A	N/A	N/A	N/A	GCA_011772755.1	95	d__Bacteria;p__Gemmatimonadota;c__Gemmatimonadetes;o__Gemmatimonadales;f__GWC2-71-9;g__WVYX01;s__WVYX01 sp011772755	75.98	0.09	d__Bacteria;p__Gemmatimonadota;c__Gemmatimonadetes;o__Gemmatimonadales;f__GWC2-71-9;g__;s__	taxonomic classification defined by topology and ANI	N/A	N/A	81.02
	BHB10-2_Bin_102	Group4	Y	Yes	Gemmatimonadetes	d__Bacteria;p__Gemmatimonadota;c__Gemmatimonadetes;o__Longimicrobiales;f__UBA6960;g__;s__	N	3.52808	3.56732	169	241712	64689	66.2	3249	3528082	2055	20876.2	Bohai Sea BHB10, China	Coastal Sediment	38.75N/118.1533E	k__Bacteria (UID2495)	2993	147	91	1	143	3	0	0	0	98.9	3.3	0	d__Bacteria;p__Gemmatimonadota;c__Gemmatimonadetes;o__Longimicrobiales;f__UBA6960;g__;s__	N/A	N/A	N/A	N/A	N/A	N/A	N/A	N/A	N/A	N/A	d__Bacteria;p__Gemmatimonadota;c__Gemmatimonadetes;o__Longimicrobiales;f__UBA6960;g__;s__	taxonomic classification fully defined by topology	N/A	N/A	88.54
	BHB10-2_Bin_105	Group2	N	Yes	Gemmatimonadetes	d__Bacteria;p__Gemmatimonadota;c__Gemmatimonadetes;o__Gemmatimonadales;f__GWC2-71-9;g__WVYX01;s__	N	3.72518	3.98799	519	70819	12858	67.78	3822	3725182	2007	7177.6	Bohai Sea BHB10, China	Coastal Sediment	38.75N/118.1533E	k__Bacteria (UID2495)	2993	147	91	6	131	9	1	0	0	93.41	8.08	8.33	d__Bacteria;p__Gemmatimonadota;c__Gemmatimonadetes;o__Gemmatimonadales;f__GWC2-71-9;g__WVYX01;s__	N/A	N/A	N/A	N/A	N/A	GCA_011772755.1	95	d__Bacteria;p__Gemmatimonadota;c__Gemmatimonadetes;o__Gemmatimonadales;f__GWC2-71-9;g__WVYX01;s__WVYX01 sp011772755	76.7	0.2	d__Bacteria;p__Gemmatimonadota;c__Gemmatimonadetes;o__Gemmatimonadales;f__GWC2-71-9;g__;s__	taxonomic classification defined by topology and ANI	N/A	N/A	79.41
	BHB10-2_Bin_14	Group4	N	Yes	Gemmatimonadetes	d__Bacteria;p__Gemmatimonadota;c__Gemmatimonadetes;o__Longimicrobiales;f__UBA6960;g__JABDNZ01;s__	N	4.0742	5.99941	1044	20082	4112	62.87	4212	4074198	2000	3902.5	Bohai Sea BHB10, China	Coastal Sediment	38.75N/118.1533E	k__Bacteria (UID2495)	2993	147	91	45	94	8	0	0	0	67.91	6.78	12.5	d__Bacteria;p__Gemmatimonadota;c__Gemmatimonadetes;o__Longimicrobiales;f__UBA6960;g__JABDNZ01;s__	N/A	N/A	N/A	N/A	N/A	GCA_013043565.1	95	d__Bacteria;p__Gemmatimonadota;c__Gemmatimonadetes;o__Longimicrobiales;f__UBA6960;g__JABDNZ01;s__JABDNZ01 sp013043565	76.6	0.14	d__Bacteria;p__Gemmatimonadota;c__Gemmatimonadetes;o__Longimicrobiales;f__UBA6960;g__;s__	taxonomic classification defined by topology and ANI	N/A	N/A	54.64
	BHB10-2_Bin_169	Group4	N	Yes	Gemmatimonadetes	d__Bacteria;p__Gemmatimonadota;c__Gemmatimonadetes;o__Longimicrobiales;f__UBA6960;g__;s__	N	4.18313	4.22965	175	178988	65199	66.45	3731	4183128	2020	23903.6	Bohai Sea BHB10, China	Coastal Sediment	38.75N/118.1533E	k__Bacteria (UID2495)	2993	147	91	1	140	6	0	0	0	98.9	5.49	0	d__Bacteria;p__Gemmatimonadota;c__Gemmatimonadetes;o__Longimicrobiales;f__UBA6960;g__;s__	N/A	N/A	N/A	N/A	N/A	N/A	N/A	N/A	N/A	N/A	d__Bacteria;p__Gemmatimonadota;c__Gemmatimonadetes;o__Longimicrobiales;f__UBA6960;g__;s__	taxonomic classification fully defined by topology	N/A	N/A	86.8
	BHB10-2_Bin_245	Group4	Y	Yes	Gemmatimonadetes	d__Bacteria;p__Gemmatimonadota;c__Gemmatimonadetes;o__Longimicrobiales;f__UBA6960;g__;s__	N	3.66639	3.70716	131	293426	51662	68.51	3228	3666386	2006	27987.7	Bohai Sea BHB10, China	Coastal Sediment	38.75N/118.1533E	k__Bacteria (UID2495)	2993	147	91	1	143	3	0	0	0	98.9	3.3	0	d__Bacteria;p__Gemmatimonadota;c__Gemmatimonadetes;o__Longimicrobiales;f__UBA6960;g__;s__	N/A	N/A	N/A	N/A	N/A	N/A	N/A	N/A	N/A	N/A	d__Bacteria;p__Gemmatimonadota;c__Gemmatimonadetes;o__Longimicrobiales;f__UBA6960;g__;s__	taxonomic classification fully defined by topology	N/A	N/A	89.44
	BHB10-2_Bin_277	Group2	Y	Yes	Gemmatimonadetes	d__Bacteria;p__Gemmatimonadota;c__Gemmatimonadetes;o__Gemmatimonadales;f__GWC2-71-9;g__N074bin45;s__	N	3.83435	4.05708	300	122093	25116	66.4	3620	3834350	2014	12781.2	Bohai Sea BHB10, China	Coastal Sediment	38.75N/118.1533E	k__Bacteria (UID2495)	2993	147	91	5	133	9	0	0	0	94.51	4.9	0	d__Bacteria;p__Gemmatimonadota;c__Gemmatimonadetes;o__Gemmatimonadales;f__GWC2-71-9;g__N074bin45;s__	N/A	N/A	N/A	N/A	N/A	GCA_004357415.1	95	d__Bacteria;p__Gemmatimonadota;c__Gemmatimonadetes;o__Gemmatimonadales;f__GWC2-71-9;g__N074bin45;s__N074bin45 sp004357415	77.61	0.37	d__Bacteria;p__Gemmatimonadota;c__Gemmatimonadetes;o__Gemmatimonadales;f__GWC2-71-9;g__;s__	taxonomic classification defined by topology and ANI	N/A	N/A	88.05
	BHB10-2_Bin_294	Group4	Y	Yes	Gemmatimonadetes	d__Bacteria;p__Gemmatimonadota;c__Gemmatimonadetes;o__Longimicrobiales;f__UBA6960;g__;s__	N	3.88898	3.93224	85	231162	129660	65.43	3295	3888982	2010	45752.7	Bohai Sea BHB10, China	Coastal Sediment	38.75N/118.1533E	k__Bacteria (UID2495)	2993	147	91	1	142	4	0	0	0	98.9	4.4	0	d__Bacteria;p__Gemmatimonadota;c__Gemmatimonadetes;o__Longimicrobiales;f__UBA6960;g__;s__	N/A	N/A	N/A	N/A	N/A	N/A	N/A	N/A	N/A	N/A	d__Bacteria;p__Gemmatimonadota;c__Gemmatimonadetes;o__Longimicrobiales;f__UBA6960;g__;s__	taxonomic classification fully defined by topology	N/A	N/A	90.87
	BHB10-2_Bin_296	Group3	Y	Yes	Gemmatimonadetes	d__Bacteria;p__Gemmatimonadota;c__Gemmatimonadetes;o__KS3-K002;f__;g__;s__	Y	3.19047	3.40534	251	82559	18338	65.92	3093	3190465	2000	12711	Bohai Sea BHB10, China	Coastal Sediment	38.75N/118.1533E	k__Bacteria (UID2495)	2993	147	91	10	133	4	0	0	0	93.69	3.85	25	d__Bacteria;p__Gemmatimonadota;c__Gemmatimonadetes;o__KS3-K002;f__;g__;s__	N/A	N/A	N/A	N/A	N/A	N/A	N/A	N/A	N/A	N/A	d__Bacteria;p__Gemmatimonadota;c__Gemmatimonadetes;o__KS3-K002;f__;g__;s__	taxonomic novelty determined using RED	N/A	N/A	80.76
	BHB10-2_Bin_297	Group4	Y	Yes	Gemmatimonadetes	d__Bacteria;p__Gemmatimonadota;c__Gemmatimonadetes;o__Longimicrobiales;f__UBA6960;g__;s__	N	4.32393	4.43753	177	174603	46698	68.39	3753	4323930	2179	24429	Bohai Sea BHB10, China	Coastal Sediment	38.75N/118.1533E	k__Bacteria (UID2495)	2993	147	91	3	141	3	0	0	0	97.44	3.3	0	d__Bacteria;p__Gemmatimonadota;c__Gemmatimonadetes;o__Longimicrobiales;f__UBA6960;g__;s__	N/A	N/A	N/A	N/A	N/A	GCA_002346665.1	95	d__Bacteria;p__Gemmatimonadota;c__Gemmatimonadetes;o__Longimicrobiales;f__UBA6960;g__UBA2988;s__UBA2988 sp002346665	76.15	0.04	d__Bacteria;p__Gemmatimonadota;c__Gemmatimonadetes;o__Longimicrobiales;f__UBA6960;g__;s__	taxonomic classification defined by topology and ANI	N/A	N/A	89.52
	BHB10-2_Bin_304	Group3	Y	Yes	Gemmatimonadetes	d__Bacteria;p__Gemmatimonadota;c__Gemmatimonadetes;o__KS3-K002;f__JABDQB01;g__;s__	Y	4.4235	4.57729	119	398998	87640	66.82	3927	4423497	2032	37172.2	Bohai Sea BHB10, China	Coastal Sediment	38.75N/118.1533E	k__Bacteria (UID2495)	2993	147	91	4	140	2	1	0	0	96.64	4.4	20	d__Bacteria;p__Gemmatimonadota;c__Gemmatimonadetes;o__KS3-K002;f__JABDQB01;g__;s__	N/A	N/A	N/A	N/A	N/A	N/A	N/A	N/A	N/A	N/A	d__Bacteria;p__Gemmatimonadota;c__Gemmatimonadetes;o__KS3-K002;f__JABDQB01;g__;s__	taxonomic novelty determined using RED	N/A	N/A	90.41
	BHB10-2_Bin_317	Group3	Y	Yes	Gemmatimonadetes	d__Bacteria;p__Gemmatimonadota;c__Gemmatimonadetes;o__KS3-K002;f__JABDQB01;g__;s__	Y	3.74896	4.06128	302	95981	20200	65.11	3539	3748964	2034	12413.8	Bohai Sea BHB10, China	Coastal Sediment	38.75N/118.1533E	k__Bacteria (UID2495)	2993	147	91	8	138	1	0	0	0	92.31	1.1	0	d__Bacteria;p__Gemmatimonadota;c__Gemmatimonadetes;o__KS3-K002;f__JABDQB01;g__;s__	N/A	N/A	N/A	N/A	N/A	N/A	N/A	N/A	N/A	N/A	d__Bacteria;p__Gemmatimonadota;c__Gemmatimonadetes;o__KS3-K002;f__JABDQB01;g__;s__	taxonomic novelty determined using RED	N/A	N/A	88.07
	BHB10-2_Bin_31	Group2	N	Yes	Gemmatimonadetes	d__Bacteria;p__Gemmatimonadota;c__Gemmatimonadetes;o__Gemmatimonadales;f__GWC2-71-9;g__WVYX01;s__	N	2.4144	4.25896	662	21808	3706	66.94	2792	2414402	2001	3647.1	Bohai Sea BHB10, China	Coastal Sediment	38.75N/118.1533E	k__Bacteria (UID2495)	2993	147	91	64	81	2	0	0	0	56.69	2.2	0	d__Bacteria;p__Gemmatimonadota;c__Gemmatimonadetes;o__Gemmatimonadales;f__GWC2-71-9;g__WVYX01;s__	N/A	N/A	N/A	N/A	N/A	GCA_011772755.1	95	d__Bacteria;p__Gemmatimonadota;c__Gemmatimonadetes;o__Gemmatimonadales;f__GWC2-71-9;g__WVYX01;s__WVYX01 sp011772755	76.72	0.18	d__Bacteria;p__Gemmatimonadota;c__Gemmatimonadetes;o__Gemmatimonadales;f__GWC2-71-9;g__;s__	taxonomic classification defined by topology and ANI	N/A	N/A	46.69
	BHB10-2_Bin_321	Group4	Y	Yes	Gemmatimonadetes	d__Bacteria;p__Gemmatimonadota;c__Gemmatimonadetes;o__Longimicrobiales;f__UBA6960;g__UBA2589;s__	N	4.24651	4.46203	353	86014	18128	63.99	3965	4246511	2015	12029.8	Bohai Sea BHB10, China	Coastal Sediment	38.75N/118.1533E	k__Bacteria (UID2495)	2993	147	91	7	137	3	0	0	0	95.17	3.3	0	d__Bacteria;p__Gemmatimonadota;c__Gemmatimonadetes;o__Longimicrobiales;f__UBA6960;g__UBA2589;s__	N/A	N/A	N/A	N/A	N/A	N/A	N/A	N/A	N/A	N/A	d__Bacteria;p__Gemmatimonadota;c__Gemmatimonadetes;o__Longimicrobiales;f__UBA6960;g__UBA2589;s__	ANI	N/A	GCA_002348465.1, s__UBA2589 sp002348465, 95.0, 77.14, 0.05; GCA_002390225.1, s__UBA2589 sp002390225, 95.0, 77.05, 0.2; GCA_013002885.1, s__UBA2589 sp013002885, 95.0, 76.84, 0.15; GCA_002348265.1, s__UBA2589 sp002348265, 95.0, 76.53, 0.03; GCA_002500925.1, s__UBA2589 sp002500925, 95.0, 76.47, 0.05	88.43
	BHB10-2_Bin_329	Group2	Y	Yes	Gemmatimonadetes	d__Bacteria;p__Gemmatimonadota;c__Gemmatimonadetes;o__Gemmatimonadales;f__GWC2-71-9;g__WVYX01;s__	Y	3.22522	3.29777	82	209654	81703	66.19	2996	3225218	2006	39331.9	Bohai Sea BHB10, China	Coastal Sediment	38.75N/118.1533E	k__Bacteria (UID2495)	2993	147	91	2	143	2	0	0	0	97.8	2.2	0	d__Bacteria;p__Gemmatimonadota;c__Gemmatimonadetes;o__Gemmatimonadales;f__GWC2-71-9;g__WVYX01;s__	N/A	N/A	N/A	N/A	N/A	GCA_011772755.1	95	d__Bacteria;p__Gemmatimonadota;c__Gemmatimonadetes;o__Gemmatimonadales;f__GWC2-71-9;g__WVYX01;s__WVYX01 sp011772755	76.63	0.17	d__Bacteria;p__Gemmatimonadota;c__Gemmatimonadetes;o__Gemmatimonadales;f__GWC2-71-9;g__;s__	taxonomic classification defined by topology and ANI	N/A	N/A	93.75
	BHB10-2_Bin_352	Group2	N	Yes	Gemmatimonadetes	d__Bacteria;p__Gemmatimonadota;c__Gemmatimonadetes;o__Gemmatimonadales;f__GWC2-71-9;g__WVYX01;s__	N	3.13138	3.35229	59	234479	142833	67.15	2895	3131378	2218	53074.2	Bohai Sea BHB10, China	Coastal Sediment	38.75N/118.1533E	k__Bacteria (UID2495)	2993	147	91	22	120	5	0	0	0	93.41	5.49	0	d__Bacteria;p__Gemmatimonadota;c__Gemmatimonadetes;o__Gemmatimonadales;f__GWC2-71-9;g__WVYX01;s__	N/A	N/A	N/A	N/A	N/A	GCA_011772755.1	95	d__Bacteria;p__Gemmatimonadota;c__Gemmatimonadetes;o__Gemmatimonadales;f__GWC2-71-9;g__WVYX01;s__WVYX01 sp011772755	76.93	0.21	d__Bacteria;p__Gemmatimonadota;c__Gemmatimonadetes;o__Gemmatimonadales;f__GWC2-71-9;g__;s__	taxonomic classification defined by topology and ANI	N/A	N/A	81.22
	BHB10-2_Bin_357	Group4	Y	Yes	Gemmatimonadetes	d__Bacteria;p__Gemmatimonadota;c__Gemmatimonadetes;o__Longimicrobiales;f__UBA6960;g__;s__	Y	3.50219	3.8397	356	80988	13531	66.9	3309	3502192	2020	9837.6	Bohai Sea BHB10, China	Coastal Sediment	38.75N/118.1533E	k__Bacteria (UID2495)	2993	147	91	9	135	3	0	0	0	91.21	2.75	0	d__Bacteria;p__Gemmatimonadota;c__Gemmatimonadetes;o__Longimicrobiales;f__UBA6960;g__;s__	N/A	N/A	N/A	N/A	N/A	N/A	N/A	N/A	N/A	N/A	d__Bacteria;p__Gemmatimonadota;c__Gemmatimonadetes;o__Longimicrobiales;f__UBA6960;g__;s__	taxonomic classification fully defined by topology	N/A	N/A	82.67
	BHB10-2_Bin_359	Group4	N	Yes	Gemmatimonadetes	d__Bacteria;p__Gemmatimonadota;c__Gemmatimonadetes;o__Longimicrobiales;f__UBA6960;g__;s__	N	4.42642	5.55455	519	55794	11121	67.29	4100	4426422	2020	8528.8	Bohai Sea BHB10, China	Coastal Sediment	38.75N/118.1533E	k__Bacteria (UID2495)	2993	147	91	43	99	4	1	0	0	79.69	6.59	14.29	d__Bacteria;p__Gemmatimonadota;c__Gemmatimonadetes;o__Longimicrobiales;f__UBA6960;g__;s__	N/A	N/A	N/A	N/A	N/A	N/A	N/A	N/A	N/A	N/A	d__Bacteria;p__Gemmatimonadota;c__Gemmatimonadetes;o__Longimicrobiales;f__UBA6960;g__;s__	taxonomic classification fully defined by topology	N/A	N/A	67.08
	BHB10-2_Bin_373	Group2	Y	Yes	Gemmatimonadetes	d__Bacteria;p__Gemmatimonadota;c__Gemmatimonadetes;o__Gemmatimonadales;f__GWC2-71-9;g__WVYX01;s__	N	2.83811	3.26219	302	67174	12240	68.5	2813	2838109	2031	9397.7	Bohai Sea BHB10, China	Coastal Sediment	38.75N/118.1533E	k__Bacteria (UID2495)	2993	147	91	13	131	3	0	0	0	87	3.3	33.33	d__Bacteria;p__Gemmatimonadota;c__Gemmatimonadetes;o__Gemmatimonadales;f__GWC2-71-9;g__WVYX01;s__	N/A	N/A	N/A	N/A	N/A	GCA_011772755.1	95	d__Bacteria;p__Gemmatimonadota;c__Gemmatimonadetes;o__Gemmatimonadales;f__GWC2-71-9;g__WVYX01;s__WVYX01 sp011772755	75.96	0.12	d__Bacteria;p__Gemmatimonadota;c__Gemmatimonadetes;o__Gemmatimonadales;f__GWC2-71-9;g__;s__	taxonomic classification defined by topology and ANI	N/A	N/A	78.82
	BHB10-2_Bin_436	Group4	N	Yes	Gemmatimonadetes	d__Bacteria;p__Gemmatimonadota;c__Gemmatimonadetes;o__Longimicrobiales;f__UBA6960;g__UBA2589;s__	N	3.1692	5.77582	855	19454	3869	67.31	3417	3169195	2001	3706.7	Bohai Sea BHB10, China	Coastal Sediment	38.75N/118.1533E	k__Bacteria (UID2495)	2993	147	91	62	81	4	0	0	0	54.87	3.4	25	d__Bacteria;p__Gemmatimonadota;c__Gemmatimonadetes;o__Longimicrobiales;f__UBA6960;g__UBA2589;s__	N/A	N/A	N/A	N/A	N/A	N/A	N/A	N/A	N/A	N/A	d__Bacteria;p__Gemmatimonadota;c__Gemmatimonadetes;o__Longimicrobiales;f__UBA6960;g__UBA2589;s__	ANI	N/A	GCA_013002885.1, s__UBA2589 sp013002885, 95.0, 77.14, 0.19; GCA_002390225.1, s__UBA2589 sp002390225, 95.0, 76.65, 0.14; GCA_002500925.1, s__UBA2589 sp002500925, 95.0, 76.27, 0.02; GCA_002348465.1, s__UBA2589 sp002348465, 95.0, 75.69, 0.02; GCA_002348265.1, s__UBA2589 sp002348265, 95.0, 75.26, 0.02	45.58
	BHB10-2_Bin_479	Group3	Y	Yes	Gemmatimonadetes	d__Bacteria;p__Gemmatimonadota;c__Gemmatimonadetes;o__KS3-K002;f__KS3-K002;g__KS3-K002;s__	N	4.86485	5.03399	197	208100	50133	62.25	4313	4864848	2033	24694.7	Bohai Sea BHB10, China	Coastal Sediment	38.75N/118.1533E	k__Bacteria (UID2495)	2993	147	91	4	140	3	0	0	0	96.64	3.3	0	d__Bacteria;p__Gemmatimonadota;c__Gemmatimonadetes;o__KS3-K002;f__KS3-K002;g__KS3-K002;s__	N/A	N/A	N/A	N/A	N/A	GCA_011774835.1	95	d__Bacteria;p__Gemmatimonadota;c__Gemmatimonadetes;o__KS3-K002;f__KS3-K002;g__KS3-K002;s__KS3-K002 sp011774835	77.35	0.29	d__Bacteria;p__Gemmatimonadota;c__Gemmatimonadetes;o__KS3-K002;f__;g__;s__	taxonomic classification defined by topology and ANI	N/A	N/A	88.47
	BHB10-2_Bin_74	Group4	Y	Yes	Gemmatimonadetes	d__Bacteria;p__Gemmatimonadota;c__Gemmatimonadetes;o__Longimicrobiales;f__UBA6960;g__;s__	N	5.93935	6.00541	397	221100	31916	67.73	5274	5939350	2001	14960.6	Bohai Sea BHB10, China	Coastal Sediment	38.75N/118.1533E	k__Bacteria (UID2495)	2993	147	91	1	143	3	0	0	0	98.9	3.3	0	d__Bacteria;p__Gemmatimonadota;c__Gemmatimonadetes;o__Longimicrobiales;f__UBA6960;g__;s__	N/A	N/A	N/A	N/A	N/A	N/A	N/A	N/A	N/A	N/A	d__Bacteria;p__Gemmatimonadota;c__Gemmatimonadetes;o__Longimicrobiales;f__UBA6960;g__;s__	taxonomic classification fully defined by topology	N/A	N/A	88.54
	BHB10-2_Bin_90	Group3	N	Yes	Gemmatimonadetes	d__Bacteria;p__Gemmatimonadota;c__Gemmatimonadetes;o__KS3-K002;f__KS3-K002;g__KS3-K002;s__	N	2.69169	5.1241	788	30812	3463	64.73	3051	2691688	2000	3415.8	Bohai Sea BHB10, China	Coastal Sediment	38.75N/118.1533E	k__Bacteria (UID2495)	2993	147	91	67	77	2	1	0	0	52.53	4.4	20	d__Bacteria;p__Gemmatimonadota;c__Gemmatimonadetes;o__KS3-K002;f__KS3-K002;g__KS3-K002;s__	N/A	N/A	N/A	N/A	N/A	GCA_011774835.1	95	d__Bacteria;p__Gemmatimonadota;c__Gemmatimonadetes;o__KS3-K002;f__KS3-K002;g__KS3-K002;s__KS3-K002 sp011774835	77.41	0.21	d__Bacteria;p__Gemmatimonadota;c__Gemmatimonadetes;o__KS3-K002;f__;g__;s__	taxonomic classification defined by topology and ANI	N/A	N/A	44.63
	BHB10-2_Bin_96	Group3	N	Yes	Gemmatimonadetes	d__Bacteria;p__Gemmatimonadota;c__Gemmatimonadetes;o__KS3-K002;f__JABDQB01;g__JABDQB01;s__	N	2.26132	3.01509	486	25385	5201	65.84	2567	2261315	2003	4652.9	Bohai Sea BHB10, China	Coastal Sediment	38.75N/118.1533E	k__Bacteria (UID2495)	2993	147	91	31	114	2	0	0	0	75	0.2	0	d__Bacteria;p__Gemmatimonadota;c__Gemmatimonadetes;o__KS3-K002;f__JABDQB01;g__JABDQB01;s__	N/A	N/A	N/A	N/A	N/A	GCA_013042495.1	95	d__Bacteria;p__Gemmatimonadota;c__Gemmatimonadetes;o__KS3-K002;f__JABDQB01;g__JABDQB01;s__JABDQB01 sp013042495	79.05	0.4	d__Bacteria;p__Gemmatimonadota;c__Gemmatimonadetes;o__KS3-K002;f__JABDQB01;g__;s__	taxonomic classification defined by topology and ANI	N/A	N/A	61.66
	BHB10-38_Bin_112	Group3	Y	Yes	Gemmatimonadetes	d__Bacteria;p__Gemmatimonadota;c__Gemmatimonadetes;o__KS3-K002;f__KS3-K002;g__KS3-K002;s__	N	4.11007	4.29924	198	180978	50209	65.99	3799	4110072	2016	20757.9	Bohai Sea BHB10, China	Coastal Sediment	38.75N/118.1533E	k__Bacteria (UID2495)	2993	147	91	4	140	3	0	0	0	95.6	3.3	0	d__Bacteria;p__Gemmatimonadota;c__Gemmatimonadetes;o__KS3-K002;f__KS3-K002;g__KS3-K002;s__	N/A	N/A	N/A	N/A	N/A	GCA_011774835.1	95	d__Bacteria;p__Gemmatimonadota;c__Gemmatimonadetes;o__KS3-K002;f__KS3-K002;g__KS3-K002;s__KS3-K002 sp011774835	77.82	0.31	d__Bacteria;p__Gemmatimonadota;c__Gemmatimonadetes;o__KS3-K002;f__;g__;s__	taxonomic classification defined by topology and ANI	N/A	N/A	88.15
	BHB10-38_Bin_161	Group4	N	Yes	Gemmatimonadetes	d__Bacteria;p__Gemmatimonadota;c__Gemmatimonadetes;o__Longimicrobiales;f__UBA6960;g__;s__	N	5.36601	5.61299	384	119638	30525	65.45	4851	5366014	2010	13974	Bohai Sea BHB10, China	Coastal Sediment	38.75N/118.1533E	k__Bacteria (UID2495)	2993	147	91	4	137	6	0	0	0	95.6	5.49	0	d__Bacteria;p__Gemmatimonadota;c__Gemmatimonadetes;o__Longimicrobiales;f__UBA6960;g__;s__	N/A	N/A	N/A	N/A	N/A	N/A	N/A	N/A	N/A	N/A	d__Bacteria;p__Gemmatimonadota;c__Gemmatimonadetes;o__Longimicrobiales;f__UBA6960;g__;s__	taxonomic classification fully defined by topology	N/A	N/A	88.9
	BHB10-38_Bin_179	Group3	Y	Yes	Gemmatimonadetes	d__Bacteria;p__Gemmatimonadota;c__Gemmatimonadetes;o__KS3-K002;f__KS3-K002;g__;s__	N	3.85682	4.03433	190	96711	31455	65.52	3470	3856816	2079	20299	Bohai Sea BHB10, China	Coastal Sediment	38.75N/118.1533E	k__Bacteria (UID2495)	2993	147	91	4	138	5	0	0	0	95.6	4.5	20	d__Bacteria;p__Gemmatimonadota;c__Gemmatimonadetes;o__KS3-K002;f__KS3-K002;g__;s__	N/A	N/A	N/A	N/A	N/A	GCA_011774835.1	95	d__Bacteria;p__Gemmatimonadota;c__Gemmatimonadetes;o__KS3-K002;f__KS3-K002;g__KS3-K002;s__KS3-K002 sp011774835	77.43	0.23	d__Bacteria;p__Gemmatimonadota;c__Gemmatimonadetes;o__KS3-K002;f__;g__;s__	taxonomic classification defined by topology and ANI	N/A	N/A	84.47
	BHB10-38_Bin_17	Group4	N	Yes	Gemmatimonadetes	d__Bacteria;p__Gemmatimonadota;c__Gemmatimonadetes;o__Longimicrobiales;f__UBA6960;g__;s__	N	4.26333	4.88802	310	147955	16588	67.93	3826	4263328	2251	13752.7	Bohai Sea BHB10, China	Coastal Sediment	38.75N/118.1533E	k__Bacteria (UID2495)	2993	147	91	20	119	8	0	0	0	87.22	8.79	0	d__Bacteria;p__Gemmatimonadota;c__Gemmatimonadetes;o__Longimicrobiales;f__UBA6960;g__;s__	N/A	N/A	N/A	N/A	N/A	GCA_002346665.1	95	d__Bacteria;p__Gemmatimonadota;c__Gemmatimonadetes;o__Longimicrobiales;f__UBA6960;g__UBA2988;s__UBA2988 sp002346665	75.63	0.04	d__Bacteria;p__Gemmatimonadota;c__Gemmatimonadetes;o__Longimicrobiales;f__UBA6960;g__;s__	taxonomic classification defined by topology and ANI	N/A	N/A	69.49
	BHB10-38_Bin_203	Group4	N	Yes	Gemmatimonadetes	d__Bacteria;p__Gemmatimonadota;c__Gemmatimonadetes;o__Longimicrobiales;f__UBA6960;g__UBA2589;s__	N	3.91429	5.58147	1043	24854	3927	67.39	4191	3914287	2001	3752.9	Bohai Sea BHB10, China	Coastal Sediment	38.75N/118.1533E	k__Bacteria (UID2495)	2993	147	91	32	104	11	0	0	0	70.13	3.84	27.27	d__Bacteria;p__Gemmatimonadota;c__Gemmatimonadetes;o__Longimicrobiales;f__UBA6960;g__UBA2589;s__	N/A	N/A	N/A	N/A	N/A	N/A	N/A	N/A	N/A	N/A	d__Bacteria;p__Gemmatimonadota;c__Gemmatimonadetes;o__Longimicrobiales;f__UBA6960;g__UBA2589;s__	ANI	N/A	GCA_002390225.1, s__UBA2589 sp002390225, 95.0, 77.36, 0.15; GCA_013002885.1, s__UBA2589 sp013002885, 95.0, 77.01, 0.23; GCA_002348265.1, s__UBA2589 sp002348265, 95.0, 76.3, 0.03; GCA_002348465.1, s__UBA2589 sp002348465, 95.0, 76.22, 0.03; GCA_002500925.1, s__UBA2589 sp002500925, 95.0, 75.96, 0.03	63.95
	BHB10-38_Bin_205	Group4	Y	Yes	Gemmatimonadetes	d__Bacteria;p__Gemmatimonadota;c__Gemmatimonadetes;o__Longimicrobiales;f__UBA6960;g__;s__	N	3.21819	3.32801	234	91446	21273	66.2	3053	3218185	2000	13752.9	Bohai Sea BHB10, China	Coastal Sediment	38.75N/118.1533E	k__Bacteria (UID2495)	2993	147	91	3	141	3	0	0	0	96.7	2.26	0	d__Bacteria;p__Gemmatimonadota;c__Gemmatimonadetes;o__Longimicrobiales;f__UBA6960;g__;s__	N/A	N/A	N/A	N/A	N/A	N/A	N/A	N/A	N/A	N/A	d__Bacteria;p__Gemmatimonadota;c__Gemmatimonadetes;o__Longimicrobiales;f__UBA6960;g__;s__	taxonomic classification fully defined by topology	N/A	N/A	85.73
	BHB10-38_Bin_209	Group2	Y	Yes	Gemmatimonadetes	d__Bacteria;p__Gemmatimonadota;c__Gemmatimonadetes;o__Gemmatimonadales;f__GWC2-71-9;g__WVYX01;s__	N	2.99324	3.3632	238	67644	16989	67.16	2964	2993244	2215	12576.7	Bohai Sea BHB10, China	Coastal Sediment	38.75N/118.1533E	k__Bacteria (UID2495)	2993	147	91	25	120	2	0	0	0	89	2.2	0	d__Bacteria;p__Gemmatimonadota;c__Gemmatimonadetes;o__Gemmatimonadales;f__GWC2-71-9;g__WVYX01;s__	N/A	N/A	N/A	N/A	N/A	GCA_011772755.1	95	d__Bacteria;p__Gemmatimonadota;c__Gemmatimonadetes;o__Gemmatimonadales;f__GWC2-71-9;g__WVYX01;s__WVYX01 sp011772755	76.75	0.22	d__Bacteria;p__Gemmatimonadota;c__Gemmatimonadetes;o__Gemmatimonadales;f__GWC2-71-9;g__;s__	taxonomic classification defined by topology and ANI	N/A	N/A	76.28
	BHB10-38_Bin_244	Group4	Y	Yes	Gemmatimonadetes	d__Bacteria;p__Gemmatimonadota;c__Gemmatimonadetes;o__Longimicrobiales;f__UBA6960;g__SZUA-318;s__	N	5.66683	5.86022	374	108706	29456	68.15	5035	5666832	2004	15152	Bohai Sea BHB10, China	Coastal Sediment	38.75N/118.1533E	k__Bacteria (UID2495)	2993	147	91	3	140	4	0	0	0	96.7	4.4	0	d__Bacteria;p__Gemmatimonadota;c__Gemmatimonadetes;o__Longimicrobiales;f__UBA6960;g__SZUA-318;s__	N/A	N/A	N/A	N/A	N/A	GCA_003248075.1	95	d__Bacteria;p__Gemmatimonadota;c__Gemmatimonadetes;o__Longimicrobiales;f__UBA6960;g__SZUA-318;s__SZUA-318 sp003248075	76.95	0.23	d__Bacteria;p__Gemmatimonadota;c__Gemmatimonadetes;o__Longimicrobiales;f__UBA6960;g__;s__	taxonomic classification defined by topology and ANI	N/A	N/A	85.81
	BHB10-38_Bin_250	Group3	Y	Yes	Gemmatimonadetes	d__Bacteria;p__Gemmatimonadota;c__Gemmatimonadetes;o__KS3-K002;f__JABDQB01;g__JABDQB01;s__	N	3.19829	3.34549	128	163009	46717	66.65	2985	3198287	2066	24986.6	Bohai Sea BHB10, China	Coastal Sediment	38.75N/118.1533E	k__Bacteria (UID2495)	2993	147	91	4	140	3	0	0	0	95.6	3.3	0	d__Bacteria;p__Gemmatimonadota;c__Gemmatimonadetes;o__KS3-K002;f__JABDQB01;g__JABDQB01;s__	N/A	N/A	N/A	N/A	N/A	GCA_013042495.1	95	d__Bacteria;p__Gemmatimonadota;c__Gemmatimonadetes;o__KS3-K002;f__JABDQB01;g__JABDQB01;s__JABDQB01 sp013042495	77.94	0.29	d__Bacteria;p__Gemmatimonadota;c__Gemmatimonadetes;o__KS3-K002;f__JABDQB01;g__;s__	taxonomic classification defined by topology and ANI	N/A	N/A	92.57
	BHB10-38_Bin_254	Group1	N	Yes	Gemmatimonadetes	d__Bacteria;p__Gemmatimonadota;c__Gemmatimonadetes;o__JACCXV01;f__;g__;s__	N	1.88962	2.67462	427	18518	4830	62.1	2246	1889621	2000	4425.3	Bohai Sea BHB10, China	Coastal Sediment	38.75N/118.1533E	k__Bacteria (UID2495)	2993	147	91	42	105	0	0	0	0	70.65	0	0	d__Bacteria;p__Gemmatimonadota;c__Gemmatimonadetes;o__JACCXV01;f__;g__;s__	N/A	N/A	N/A	N/A	N/A	GCA_013696835.1	95	d__Bacteria;p__Gemmatimonadota;c__Gemmatimonadetes;o__JACCXV01;f__JACCXV01;g__JACCXV01;s__JACCXV01 sp013696835	76.07	0.03	d__Bacteria;p__Gemmatimonadota;c__Gemmatimonadetes;o__;f__;g__;s__	taxonomic classification defined by topology and ANI	N/A	N/A	61.68
	BHB10-38_Bin_27	Group2	Y	Yes	Gemmatimonadetes	d__Bacteria;p__Gemmatimonadota;c__Gemmatimonadetes;o__Gemmatimonadales;f__GWC2-71-9;g__WVYX01;s__	N	5.43957	5.96379	132	233891	61780	60.16	4877	5439569	3869	41208.9	Bohai Sea BHB10, China	Coastal Sediment	38.75N/118.1533E	k__Bacteria (UID2495)	2993	147	91	26	117	4	0	0	0	91.21	4.4	0	d__Bacteria;p__Gemmatimonadota;c__Gemmatimonadetes;o__Gemmatimonadales;f__GWC2-71-9;g__WVYX01;s__	N/A	N/A	N/A	N/A	N/A	GCA_011772755.1	95	d__Bacteria;p__Gemmatimonadota;c__Gemmatimonadetes;o__Gemmatimonadales;f__GWC2-71-9;g__WVYX01;s__WVYX01 sp011772755	76.74	0.07	d__Bacteria;p__Gemmatimonadota;c__Gemmatimonadetes;o__Gemmatimonadales;f__GWC2-71-9;g__;s__	taxonomic classification defined by topology and ANI	N/A	N/A	82.17
	BHB10-38_Bin_289	Group4	Y	Yes	Gemmatimonadetes	d__Bacteria;p__Gemmatimonadota;c__Gemmatimonadetes;o__Longimicrobiales;f__UBA6960;g__JABDNZ01;s__	N	4.96907	5.28849	789	53769	7810	63.01	4747	4969067	2017	6297.9	Bohai Sea BHB10, China	Coastal Sediment	38.75N/118.1533E	k__Bacteria (UID2495)	2993	147	91	8	137	2	0	0	0	93.96	2.2	0	d__Bacteria;p__Gemmatimonadota;c__Gemmatimonadetes;o__Longimicrobiales;f__UBA6960;g__JABDNZ01;s__	N/A	N/A	N/A	N/A	N/A	GCA_013043565.1	95	d__Bacteria;p__Gemmatimonadota;c__Gemmatimonadetes;o__Longimicrobiales;f__UBA6960;g__JABDNZ01;s__JABDNZ01 sp013043565	77.27	0.16	d__Bacteria;p__Gemmatimonadota;c__Gemmatimonadetes;o__Longimicrobiales;f__UBA6960;g__;s__	taxonomic classification defined by topology and ANI	N/A	N/A	83.14
	BHB10-38_Bin_297	Group3	Y	Yes	Gemmatimonadetes	d__Bacteria;p__Gemmatimonadota;c__Gemmatimonadetes;o__KS3-K002;f__JABDQB01;g__JABDQB01;s__	N	2.23662	2.7376	518	22847	4842	65.77	2461	2236623	2000	4317.8	Bohai Sea BHB10, China	Coastal Sediment	38.75N/118.1533E	k__Bacteria (UID2495)	2993	147	91	30	114	3	0	0	0	81.7	3.3	33.33	d__Bacteria;p__Gemmatimonadota;c__Gemmatimonadetes;o__KS3-K002;f__JABDQB01;g__JABDQB01;s__	N/A	N/A	N/A	N/A	N/A	GCA_013042495.1	95	d__Bacteria;p__Gemmatimonadota;c__Gemmatimonadetes;o__KS3-K002;f__JABDQB01;g__JABDQB01;s__JABDQB01 sp013042495	79.78	0.47	d__Bacteria;p__Gemmatimonadota;c__Gemmatimonadetes;o__KS3-K002;f__JABDQB01;g__;s__	taxonomic classification defined by topology and ANI	N/A	N/A	70.28
	BHB10-38_Bin_303	Group4	N	Yes	Gemmatimonadetes	d__Bacteria;p__Gemmatimonadota;c__Gemmatimonadetes;o__Longimicrobiales;f__UBA6960;g__SZUA-318;s__	N	3.2513	4.52828	753	14168	4869	67.25	3445	3251305	2004	4317.8	Bohai Sea BHB10, China	Coastal Sediment	38.75N/118.1533E	k__Bacteria (UID2495)	2993	147	91	36	99	11	1	0	0	71.8	9.22	14.29	d__Bacteria;p__Gemmatimonadota;c__Gemmatimonadetes;o__Longimicrobiales;f__UBA6960;g__SZUA-318;s__	N/A	N/A	N/A	N/A	N/A	GCA_003248075.1	95	d__Bacteria;p__Gemmatimonadota;c__Gemmatimonadetes;o__Longimicrobiales;f__UBA6960;g__SZUA-318;s__SZUA-318 sp003248075	76.87	0.21	d__Bacteria;p__Gemmatimonadota;c__Gemmatimonadetes;o__Longimicrobiales;f__UBA6960;g__;s__	taxonomic classification defined by topology and ANI	N/A	N/A	52.05
	BHB10-38_Bin_316	Group3	Y	Yes	Gemmatimonadetes	d__Bacteria;p__Gemmatimonadota;c__Gemmatimonadetes;o__KS3-K002;f__JABDQB01;g__;s__	Y	4.01238	4.19705	226	159794	35864	65.02	3642	4012382	2012	17753.9	Bohai Sea BHB10, China	Coastal Sediment	38.75N/118.1533E	k__Bacteria (UID2495)	2993	147	91	4	138	5	0	0	0	95.6	4.76	40	d__Bacteria;p__Gemmatimonadota;c__Gemmatimonadetes;o__KS3-K002;f__JABDQB01;g__;s__	N/A	N/A	N/A	N/A	N/A	N/A	N/A	N/A	N/A	N/A	d__Bacteria;p__Gemmatimonadota;c__Gemmatimonadetes;o__KS3-K002;f__JABDQB01;g__;s__	taxonomic novelty determined using RED	N/A	N/A	91.44
	BHB10-38_Bin_317	Group2	Y	Yes	Gemmatimonadetes	d__Bacteria;p__Gemmatimonadota;c__Gemmatimonadetes;o__Gemmatimonadales;f__GWC2-71-9;g__WVYX01;s__	N	3.24354	3.94303	256	67951	18899	67.59	3140	3243536	2060	12670.1	Bohai Sea BHB10, China	Coastal Sediment	38.75N/118.1533E	k__Bacteria (UID2495)	2993	147	91	35	108	4	0	0	0	82.26	3.85	25	d__Bacteria;p__Gemmatimonadota;c__Gemmatimonadetes;o__Gemmatimonadales;f__GWC2-71-9;g__WVYX01;s__	N/A	N/A	N/A	N/A	N/A	GCA_011772755.1	95	d__Bacteria;p__Gemmatimonadota;c__Gemmatimonadetes;o__Gemmatimonadales;f__GWC2-71-9;g__WVYX01;s__WVYX01 sp011772755	76.89	0.18	d__Bacteria;p__Gemmatimonadota;c__Gemmatimonadetes;o__Gemmatimonadales;f__GWC2-71-9;g__;s__	taxonomic classification defined by topology and ANI	N/A	N/A	77.49
	BHB10-38_Bin_320	Group3	Y	Yes	Gemmatimonadetes	d__Bacteria;p__Gemmatimonadota;c__Gemmatimonadetes;o__KS3-K002;f__KS3-K002;g__KS3-K002;s__	N	4.25277	4.40063	195	124550	33769	64.48	3878	4252769	2009	21809.1	Bohai Sea BHB10, China	Coastal Sediment	38.75N/118.1533E	k__Bacteria (UID2495)	2993	147	91	4	140	3	0	0	0	96.64	3.3	0	d__Bacteria;p__Gemmatimonadota;c__Gemmatimonadetes;o__KS3-K002;f__KS3-K002;g__KS3-K002;s__	N/A	N/A	N/A	N/A	N/A	GCA_011774835.1	95	d__Bacteria;p__Gemmatimonadota;c__Gemmatimonadetes;o__KS3-K002;f__KS3-K002;g__KS3-K002;s__KS3-K002 sp011774835	77.62	0.28	d__Bacteria;p__Gemmatimonadota;c__Gemmatimonadetes;o__KS3-K002;f__;g__;s__	taxonomic classification defined by topology and ANI	N/A	N/A	86.86
	BHB10-38_Bin_328	Group2	Y	Yes	Gemmatimonadetes	d__Bacteria;p__Gemmatimonadota;c__Gemmatimonadetes;o__Gemmatimonadales;f__GWC2-71-9;g__WVYX01;s__	N	3.12301	3.40345	217	81180	19503	66.19	3042	3123005	2026	14391.7	Bohai Sea BHB10, China	Coastal Sediment	38.75N/118.1533E	k__Bacteria (UID2495)	2993	147	91	10	132	5	0	0	0	91.76	3.43	80	d__Bacteria;p__Gemmatimonadota;c__Gemmatimonadetes;o__Gemmatimonadales;f__GWC2-71-9;g__WVYX01;s__	N/A	N/A	N/A	N/A	N/A	GCA_011772755.1	95	d__Bacteria;p__Gemmatimonadota;c__Gemmatimonadetes;o__Gemmatimonadales;f__GWC2-71-9;g__WVYX01;s__WVYX01 sp011772755	76.56	0.16	d__Bacteria;p__Gemmatimonadota;c__Gemmatimonadetes;o__Gemmatimonadales;f__GWC2-71-9;g__;s__	taxonomic classification defined by topology and ANI	N/A	N/A	86.06
	BHB10-38_Bin_32	Group3	Y	Yes	Gemmatimonadetes	d__Bacteria;p__Gemmatimonadota;c__Gemmatimonadetes;o__KS3-K002;f__KS3-K002;g__KS3-K002;s__	N	3.06481	3.70728	615	30917	5755	65.08	3200	3064807	2000	4983.4	Bohai Sea BHB10, China	Coastal Sediment	38.75N/118.1533E	k__Bacteria (UID2495)	2993	147	91	19	124	4	0	0	0	82.67	3.4	25	d__Bacteria;p__Gemmatimonadota;c__Gemmatimonadetes;o__KS3-K002;f__KS3-K002;g__KS3-K002;s__	N/A	N/A	N/A	N/A	N/A	GCA_011774835.1	95	d__Bacteria;p__Gemmatimonadota;c__Gemmatimonadetes;o__KS3-K002;f__KS3-K002;g__KS3-K002;s__KS3-K002 sp011774835	77.42	0.28	d__Bacteria;p__Gemmatimonadota;c__Gemmatimonadetes;o__KS3-K002;f__;g__;s__	taxonomic classification defined by topology and ANI	N/A	N/A	70.84
	BHB10-38_Bin_340	Group3	Y	Yes	Gemmatimonadetes	d__Bacteria;p__Gemmatimonadota;c__Gemmatimonadetes;o__KS3-K002;f__;g__;s__	N	3.12361	3.3864	352	54199	12473	65.93	3151	3123613	2008	8873.9	Bohai Sea BHB10, China	Coastal Sediment	38.75N/118.1533E	k__Bacteria (UID2495)	2993	147	91	8	132	7	0	0	0	92.24	4.7	42.86	d__Bacteria;p__Gemmatimonadota;c__Gemmatimonadetes;o__KS3-K002;f__;g__;s__	N/A	N/A	N/A	N/A	N/A	N/A	N/A	N/A	N/A	N/A	d__Bacteria;p__Gemmatimonadota;c__Gemmatimonadetes;o__KS3-K002;f__;g__;s__	taxonomic novelty determined using RED	N/A	N/A	83.82
	BHB10-38_Bin_362	Group2	N	Yes	Gemmatimonadetes	d__Bacteria;p__Gemmatimonadota;c__Gemmatimonadetes;o__Gemmatimonadales;f__GWC2-71-9;g__WVYX01;s__	N	3.78059	6.46034	903	18414	4408	66.54	4004	3780592	2003	4186.7	Bohai Sea BHB10, China	Coastal Sediment	38.75N/118.1533E	k__Bacteria (UID2495)	2993	147	91	56	79	11	1	0	0	58.52	8.26	7.14	d__Bacteria;p__Gemmatimonadota;c__Gemmatimonadetes;o__Gemmatimonadales;f__GWC2-71-9;g__WVYX01;s__	N/A	N/A	N/A	N/A	N/A	GCA_011772755.1	95	d__Bacteria;p__Gemmatimonadota;c__Gemmatimonadetes;o__Gemmatimonadales;f__GWC2-71-9;g__WVYX01;s__WVYX01 sp011772755	76.1	0.1	d__Bacteria;p__Gemmatimonadota;c__Gemmatimonadetes;o__Gemmatimonadales;f__GWC2-71-9;g__;s__	taxonomic classification defined by topology and ANI	N/A	N/A	47.05
	BHB10-38_Bin_381	Group2	Y	Yes	Gemmatimonadetes	d__Bacteria;p__Gemmatimonadota;c__Gemmatimonadetes;o__Gemmatimonadales;f__GWC2-71-9;g__WVYX01;s__	N	2.95406	3.2584	335	61602	12280	67.8	3013	2954061	2007	8818.1	Bohai Sea BHB10, China	Coastal Sediment	38.75N/118.1533E	k__Bacteria (UID2495)	2993	147	91	12	132	3	0	0	0	90.66	3.3	0	d__Bacteria;p__Gemmatimonadota;c__Gemmatimonadetes;o__Gemmatimonadales;f__GWC2-71-9;g__WVYX01;s__	N/A	N/A	N/A	N/A	N/A	GCA_011772755.1	95	d__Bacteria;p__Gemmatimonadota;c__Gemmatimonadetes;o__Gemmatimonadales;f__GWC2-71-9;g__WVYX01;s__WVYX01 sp011772755	76.93	0.25	d__Bacteria;p__Gemmatimonadota;c__Gemmatimonadetes;o__Gemmatimonadales;f__GWC2-71-9;g__;s__	taxonomic classification defined by topology and ANI	N/A	N/A	84.18
	BHB10-38_Bin_389	Group3	Y	Yes	Gemmatimonadetes	d__Bacteria;p__Gemmatimonadota;c__Gemmatimonadetes;o__KS3-K002;f__KS3-K002;g__KS3-K002;s__	N	4.57396	5.01476	498	57854	12444	62.19	4359	4573963	2015	9184.7	Bohai Sea BHB10, China	Coastal Sediment	38.75N/118.1533E	k__Bacteria (UID2495)	2993	147	91	8	136	3	0	0	0	91.21	2.26	0	d__Bacteria;p__Gemmatimonadota;c__Gemmatimonadetes;o__KS3-K002;f__KS3-K002;g__KS3-K002;s__	N/A	N/A	N/A	N/A	N/A	GCA_011774835.1	95	d__Bacteria;p__Gemmatimonadota;c__Gemmatimonadetes;o__KS3-K002;f__KS3-K002;g__KS3-K002;s__KS3-K002 sp011774835	77.34	0.26	d__Bacteria;p__Gemmatimonadota;c__Gemmatimonadetes;o__KS3-K002;f__;g__;s__	taxonomic classification defined by topology and ANI	N/A	N/A	82.15
	BHB10-38_Bin_390	Group2	N	Yes	Gemmatimonadetes	d__Bacteria;p__Gemmatimonadota;c__Gemmatimonadetes;o__Gemmatimonadales;f__GWC2-71-9;g__WVYX01;s__	N	2.71127	3.41987	428	32893	7711	67.8	2849	2711272	2005	6334.7	Bohai Sea BHB10, China	Coastal Sediment	38.75N/118.1533E	k__Bacteria (UID2495)	2993	147	91	43	102	2	0	0	0	79.28	2.2	0	d__Bacteria;p__Gemmatimonadota;c__Gemmatimonadetes;o__Gemmatimonadales;f__GWC2-71-9;g__WVYX01;s__	N/A	N/A	N/A	N/A	N/A	GCA_011772755.1	95	d__Bacteria;p__Gemmatimonadota;c__Gemmatimonadetes;o__Gemmatimonadales;f__GWC2-71-9;g__WVYX01;s__WVYX01 sp011772755	76.43	0.21	d__Bacteria;p__Gemmatimonadota;c__Gemmatimonadetes;o__Gemmatimonadales;f__GWC2-71-9;g__;s__	taxonomic classification defined by topology and ANI	N/A	N/A	65.59
	BHB10-38_Bin_413	Group3	Y	Yes	Gemmatimonadetes	d__Bacteria;p__Gemmatimonadota;c__Gemmatimonadetes;o__KS3-K002;f__JABDQB01;g__;s__	Y	3.30996	3.63174	154	130968	41401	65.86	3031	3309964	2010	21493.3	Bohai Sea BHB10, China	Coastal Sediment	38.75N/118.1533E	k__Bacteria (UID2495)	2993	147	91	25	119	3	0	0	0	91.14	3.3	0	d__Bacteria;p__Gemmatimonadota;c__Gemmatimonadetes;o__KS3-K002;f__JABDQB01;g__;s__	N/A	N/A	N/A	N/A	N/A	N/A	N/A	N/A	N/A	N/A	d__Bacteria;p__Gemmatimonadota;c__Gemmatimonadetes;o__KS3-K002;f__JABDQB01;g__;s__	taxonomic novelty determined using RED	N/A	N/A	84.02
	BHB10-38_Bin_80	Group4	Y	Yes	Gemmatimonadetes	d__Bacteria;p__Gemmatimonadota;c__Gemmatimonadetes;o__Longimicrobiales;f__UBA6960;g__;s__	N	4.45125	4.60316	141	294039	98433	68.3	3828	4451252	2007	31569.2	Bohai Sea BHB10, China	Coastal Sediment	38.75N/118.1533E	k__Bacteria (UID2495)	2993	147	91	3	141	3	0	0	0	96.7	3.3	0	d__Bacteria;p__Gemmatimonadota;c__Gemmatimonadetes;o__Longimicrobiales;f__UBA6960;g__;s__	N/A	N/A	N/A	N/A	N/A	GCA_002346665.1	95	d__Bacteria;p__Gemmatimonadota;c__Gemmatimonadetes;o__Longimicrobiales;f__UBA6960;g__UBA2988;s__UBA2988 sp002346665	75.98	0.04	d__Bacteria;p__Gemmatimonadota;c__Gemmatimonadetes;o__Longimicrobiales;f__UBA6960;g__;s__	taxonomic classification defined by topology and ANI	N/A	N/A	88.33
	BHB10-38_Bin_83	Group4	Y	Yes	Gemmatimonadetes	d__Bacteria;p__Gemmatimonadota;c__Gemmatimonadetes;o__Longimicrobiales;f__UBA6960;g__;s__	N	5.76566	5.82979	315	210683	48001	67.83	5013	5765659	2017	18303.7	Bohai Sea BHB10, China	Coastal Sediment	38.75N/118.1533E	k__Bacteria (UID2495)	2993	147	91	1	143	3	0	0	0	98.9	3.3	0	d__Bacteria;p__Gemmatimonadota;c__Gemmatimonadetes;o__Longimicrobiales;f__UBA6960;g__;s__	N/A	N/A	N/A	N/A	N/A	N/A	N/A	N/A	N/A	N/A	d__Bacteria;p__Gemmatimonadota;c__Gemmatimonadetes;o__Longimicrobiales;f__UBA6960;g__;s__	taxonomic classification fully defined by topology	N/A	N/A	89.84
	LQ108M_Bin_23	Group2	Y	Yes	Gemmatimonadetes	d__Bacteria;p__Gemmatimonadota;c__Gemmatimonadetes;o__Gemmatimonadales;f__GWC2-71-9;g__;s__	Y	4.04974	4.18794	100	322600	81714	64.19	3798	4049736	2059	40497.4	Longqi Vent, Southwest Indian Ocean	Hydrothermal Vent Mat	37.78021S/49.64818E	k__Bacteria (UID2495)	2993	147	91	3	141	3	0	0	0	96.7	3.3	0	d__Bacteria;p__Gemmatimonadota;c__Gemmatimonadetes;o__Gemmatimonadales;f__GWC2-71-9;g__;s__	N/A	N/A	N/A	N/A	N/A	GCA_009692185.1	95	d__Bacteria;p__Gemmatimonadota;c__Gemmatimonadetes;o__Gemmatimonadales;f__GWC2-71-9;g__SHZT01;s__SHZT01 sp009692185	76.08	0.07	d__Bacteria;p__Gemmatimonadota;c__Gemmatimonadetes;o__Gemmatimonadales;f__GWC2-71-9;g__;s__	taxonomic classification defined by topology and ANI	N/A	N/A	92.91
	LQ108M_Bin_24	Group2	N	Yes	Gemmatimonadetes	d__Bacteria;p__Gemmatimonadota;c__Gemmatimonadetes;o__Gemmatimonadales;f__GWC2-71-9;g__WVYX01;s__	N	6.72463	6.95411	434	266037	59592	58.23	6624	6724626	2017	15494.5	Longqi Vent, Southwest Indian Ocean	Hydrothermal Vent Mat	37.78021S/49.64818E	k__Bacteria (UID2495)	2993	147	91	3	133	11	0	0	0	96.7	5.88	0	d__Bacteria;p__Gemmatimonadota;c__Gemmatimonadetes;o__Gemmatimonadales;f__GWC2-71-9;g__WVYX01;s__	N/A	N/A	N/A	N/A	N/A	GCA_011772755.1	95	d__Bacteria;p__Gemmatimonadota;c__Gemmatimonadetes;o__Gemmatimonadales;f__GWC2-71-9;g__WVYX01;s__WVYX01 sp011772755	75.58	0.03	d__Bacteria;p__Gemmatimonadota;c__Gemmatimonadetes;o__Gemmatimonadales;f__GWC2-71-9;g__;s__	taxonomic classification defined by topology and ANI	N/A	N/A	87.02
	LQ108M_Bin_25	Group4	N	Yes	Gemmatimonadetes	d__Bacteria;p__Gemmatimonadota;c__Gemmatimonadetes;o__Longimicrobiales;f__UBA6960;g__J028;s__	N	3.45987	3.58017	247	174017	34808	62.97	3347	3459874	2000	14007.6	Longqi Vent, Southwest Indian Ocean	Hydrothermal Vent Mat	37.78021S/49.64818E	k__Bacteria (UID2495)	2993	147	91	4	136	7	0	0	0	96.64	7.69	0	d__Bacteria;p__Gemmatimonadota;c__Gemmatimonadetes;o__Longimicrobiales;f__UBA6960;g__J028;s__	N/A	N/A	N/A	N/A	N/A	GCA_003695865.1	95	d__Bacteria;p__Gemmatimonadota;c__Gemmatimonadetes;o__Longimicrobiales;f__UBA6960;g__J028;s__J028 sp003695865	76.94	0.14	d__Bacteria;p__Gemmatimonadota;c__Gemmatimonadetes;o__Longimicrobiales;f__UBA6960;g__;s__	taxonomic classification defined by topology and ANI	N/A	N/A	88.37
	LQ95YO_Bin_93	Group2	N	Yes	Gemmatimonadetes	d__Bacteria;p__Gemmatimonadota;c__Gemmatimonadetes;o__Gemmatimonadales;f__GWC2-71-9;g__;s__	N	2.46097	4.43418	730	11292	3439	56.66	2725	2460972	2000	3371.2	Longqi Vent, Southwest Indian Ocean	Hydrothermal Vent Oxide	37.78021S/49.64818E	k__Bacteria (UID2495)	2993	147	91	59	88	0	0	0	0	55.5	0	0	d__Bacteria;p__Gemmatimonadota;c__Gemmatimonadetes;o__Gemmatimonadales;f__GWC2-71-9;g__;s__	N/A	N/A	N/A	N/A	N/A	N/A	N/A	N/A	N/A	N/A	d__Bacteria;p__Gemmatimonadota;c__Gemmatimonadetes;o__Gemmatimonadales;f__GWC2-71-9;g__;s__	taxonomic classification fully defined by topology	N/A	N/A	53.74
	LQ971M_Bin_17	Group2	Y	Yes	Gemmatimonadetes	d__Bacteria;p__Gemmatimonadota;c__Gemmatimonadetes;o__Gemmatimonadales;f__GWC2-71-9;g__;s__	N	4.29281	4.67219	688	35766	8176	56.78	4351	4292806	2003	6239.5	Longqi Vent, Southwest Indian Ocean	Hydrothermal Vent Oxide	37.78021S/49.64818E	k__Bacteria (UID2495)	2993	147	91	9	134	4	0	0	0	91.88	3.85	50	d__Bacteria;p__Gemmatimonadota;c__Gemmatimonadetes;o__Gemmatimonadales;f__GWC2-71-9;g__;s__	N/A	N/A	N/A	N/A	N/A	N/A	N/A	N/A	N/A	N/A	d__Bacteria;p__Gemmatimonadota;c__Gemmatimonadetes;o__Gemmatimonadales;f__GWC2-71-9;g__;s__	taxonomic classification fully defined by topology	N/A	N/A	82.05
	M3-10_Bin_101	Group2	Y	Yes	Gemmatimonadetes	d__Bacteria;p__Gemmatimonadota;c__Gemmatimonadetes;o__Gemmatimonadales;f__GWC2-71-9;g__WVYX01;s__	N	3.62686	3.70845	175	207143	54141	66.94	3398	3626864	2005	20724.9	Bohai Sea M3, China	Coastal Sediment	38.6675N/119.5475E	k__Bacteria (UID2495)	2993	147	91	2	141	4	0	0	0	97.8	4.4	0	d__Bacteria;p__Gemmatimonadota;c__Gemmatimonadetes;o__Gemmatimonadales;f__GWC2-71-9;g__WVYX01;s__	N/A	N/A	N/A	N/A	N/A	GCA_011772755.1	95	d__Bacteria;p__Gemmatimonadota;c__Gemmatimonadetes;o__Gemmatimonadales;f__GWC2-71-9;g__WVYX01;s__WVYX01 sp011772755	76.95	0.23	d__Bacteria;p__Gemmatimonadota;c__Gemmatimonadetes;o__Gemmatimonadales;f__GWC2-71-9;g__;s__	taxonomic classification defined by topology and ANI	N/A	N/A	91.5
	M3-10_Bin_107	Group4	N	Yes	Gemmatimonadetes	d__Bacteria;p__Gemmatimonadota;c__Gemmatimonadetes;o__Longimicrobiales;f__UBA6960;g__JABDNZ01;s__	N	5.77671	5.90666	546	134228	17591	62.87	5195	5776710	2015	10580.1	Bohai Sea M3, China	Coastal Sediment	38.6675N/119.5475E	k__Bacteria (UID2495)	2993	147	91	2	135	10	0	0	0	97.8	9.89	10	d__Bacteria;p__Gemmatimonadota;c__Gemmatimonadetes;o__Longimicrobiales;f__UBA6960;g__JABDNZ01;s__	N/A	N/A	N/A	N/A	N/A	GCA_013043565.1	95	d__Bacteria;p__Gemmatimonadota;c__Gemmatimonadetes;o__Longimicrobiales;f__UBA6960;g__JABDNZ01;s__JABDNZ01 sp013043565	76.94	0.19	d__Bacteria;p__Gemmatimonadota;c__Gemmatimonadetes;o__Longimicrobiales;f__UBA6960;g__;s__	taxonomic classification defined by topology and ANI	N/A	N/A	89.16
	M3-10_Bin_128	Group3	N	Yes	Gemmatimonadetes	d__Bacteria;p__Gemmatimonadota;c__Gemmatimonadetes;o__KS3-K002;f__JABDQB01;g__JABDQB01;s__	N	1.96743	2.98231	384	28497	6017	65.35	2055	1967431	2002	5123.5	Bohai Sea M3, China	Coastal Sediment	38.6675N/119.5475E	k__Bacteria (UID2495)	2993	147	91	58	88	1	0	0	0	65.97	1.1	0	d__Bacteria;p__Gemmatimonadota;c__Gemmatimonadetes;o__KS3-K002;f__JABDQB01;g__JABDQB01;s__	N/A	N/A	N/A	N/A	N/A	GCA_013042495.1	95	d__Bacteria;p__Gemmatimonadota;c__Gemmatimonadetes;o__KS3-K002;f__JABDQB01;g__JABDQB01;s__JABDQB01 sp013042495	79.79	0.46	d__Bacteria;p__Gemmatimonadota;c__Gemmatimonadetes;o__KS3-K002;f__JABDQB01;g__;s__	taxonomic classification defined by topology and ANI	N/A	N/A	56.74
	M3-10_Bin_129	Group2	N	Yes	Gemmatimonadetes	d__Bacteria;p__Gemmatimonadota;c__Gemmatimonadetes;o__Gemmatimonadales;f__GWC2-71-9;g__WVYX01;s__	N	3.74674	6.06858	1206	15144	3024	64.43	4276	3746739	2001	3106.7	Bohai Sea M3, China	Coastal Sediment	38.6675N/119.5475E	k__Bacteria (UID2495)	2993	147	91	48	89	10	0	0	0	61.74	6.44	10	d__Bacteria;p__Gemmatimonadota;c__Gemmatimonadetes;o__Gemmatimonadales;f__GWC2-71-9;g__WVYX01;s__	N/A	N/A	N/A	N/A	N/A	GCA_011772755.1	95	d__Bacteria;p__Gemmatimonadota;c__Gemmatimonadetes;o__Gemmatimonadales;f__GWC2-71-9;g__WVYX01;s__WVYX01 sp011772755	76.42	0.1	d__Bacteria;p__Gemmatimonadota;c__Gemmatimonadetes;o__Gemmatimonadales;f__GWC2-71-9;g__;s__	taxonomic classification defined by topology and ANI	N/A	N/A	47.98
	M3-10_Bin_132	Group3	N	Yes	Gemmatimonadetes	d__Bacteria;p__Gemmatimonadota;c__Gemmatimonadetes;o__KS3-K002;f__KS3-K002;g__;s__	N	2.46982	4.36518	789	15283	3073	62.62	2763	2469820	2000	3130.3	Bohai Sea M3, China	Coastal Sediment	38.6675N/119.5475E	k__Bacteria (UID203)	5449	104	58	30	53	14	7	0	0	56.58	9.64	8.57	d__Bacteria;p__Gemmatimonadota;c__Gemmatimonadetes;o__KS3-K002;f__KS3-K002;g__;s__	N/A	N/A	N/A	N/A	N/A	GCA_011774835.1	95	d__Bacteria;p__Gemmatimonadota;c__Gemmatimonadetes;o__KS3-K002;f__KS3-K002;g__KS3-K002;s__KS3-K002 sp011774835	76.46	0.09	d__Bacteria;p__Gemmatimonadota;c__Gemmatimonadetes;o__KS3-K002;f__;g__;s__	taxonomic classification defined by topology and ANI	N/A	N/A	37.8
	M3-10_Bin_137	Group3	N	Yes	Gemmatimonadetes	d__Bacteria;p__Gemmatimonadota;c__Gemmatimonadetes;o__KS3-K002;f__JABDQB01;g__;s__	N	2.4229	3.03014	369	39731	8984	63.94	2529	2422902	2007	6566.1	Bohai Sea M3, China	Coastal Sediment	38.6675N/119.5475E	k__Bacteria (UID2495)	2993	147	91	24	117	6	0	0	0	79.96	5.59	16.67	d__Bacteria;p__Gemmatimonadota;c__Gemmatimonadetes;o__KS3-K002;f__JABDQB01;g__;s__	N/A	N/A	N/A	N/A	N/A	GCA_013042495.1	95	d__Bacteria;p__Gemmatimonadota;c__Gemmatimonadetes;o__KS3-K002;f__JABDQB01;g__JABDQB01;s__JABDQB01 sp013042495	76.34	0.11	d__Bacteria;p__Gemmatimonadota;c__Gemmatimonadetes;o__KS3-K002;f__JABDQB01;g__;s__	taxonomic classification defined by topology and ANI	N/A	N/A	72.36
	M3-10_Bin_153	Group3	N	Yes	Gemmatimonadetes	d__Bacteria;p__Gemmatimonadota;c__Gemmatimonadetes;o__KS3-K002;f__JABDQB01;g__;s__	N	2.50482	3.1531	230	53144	14327	64.39	2457	2504824	2024	10890.5	Bohai Sea M3, China	Coastal Sediment	38.6675N/119.5475E	k__Bacteria (UID2495)	2993	147	91	41	104	2	0	0	0	79.44	2.2	0	d__Bacteria;p__Gemmatimonadota;c__Gemmatimonadetes;o__KS3-K002;f__JABDQB01;g__;s__	N/A	N/A	N/A	N/A	N/A	GCA_013042495.1	95	d__Bacteria;p__Gemmatimonadota;c__Gemmatimonadetes;o__KS3-K002;f__JABDQB01;g__JABDQB01;s__JABDQB01 sp013042495	76.84	0.07	d__Bacteria;p__Gemmatimonadota;c__Gemmatimonadetes;o__KS3-K002;f__JABDQB01;g__;s__	taxonomic classification defined by topology and ANI	N/A	N/A	61.74
	M3-10_Bin_157	Group3	N	Yes	Gemmatimonadetes	d__Bacteria;p__Gemmatimonadota;c__Gemmatimonadetes;o__KS3-K002;f__JABDQB01;g__;s__	N	1.47996	2.74984	198	33786	9990	64.55	1491	1479964	2044	7474.6	Bohai Sea M3, China	Coastal Sediment	38.6675N/119.5475E	k__Bacteria (UID2495)	2993	147	91	70	76	1	0	0	0	53.82	1.1	0	d__Bacteria;p__Gemmatimonadota;c__Gemmatimonadetes;o__KS3-K002;f__JABDQB01;g__;s__	N/A	N/A	N/A	N/A	N/A	GCA_013042495.1	95	d__Bacteria;p__Gemmatimonadota;c__Gemmatimonadetes;o__KS3-K002;f__JABDQB01;g__JABDQB01;s__JABDQB01 sp013042495	76.57	0.1	d__Bacteria;p__Gemmatimonadota;c__Gemmatimonadetes;o__KS3-K002;f__JABDQB01;g__;s__	taxonomic classification defined by topology and ANI	N/A	N/A	44.55
	M3-10_Bin_167	Group2	Y	Yes	Gemmatimonadetes	d__Bacteria;p__Gemmatimonadota;c__Gemmatimonadetes;o__Gemmatimonadales;f__GWC2-71-9;g__WVYX01;s__	N	3.24341	3.40551	235	104854	22559	67.54	3132	3243407	2002	13801.7	Bohai Sea M3, China	Coastal Sediment	38.6675N/119.5475E	k__Bacteria (UID2495)	2993	147	91	5	139	3	0	0	0	95.24	3.3	0	d__Bacteria;p__Gemmatimonadota;c__Gemmatimonadetes;o__Gemmatimonadales;f__GWC2-71-9;g__WVYX01;s__	N/A	N/A	N/A	N/A	N/A	GCA_011772755.1	95	d__Bacteria;p__Gemmatimonadota;c__Gemmatimonadetes;o__Gemmatimonadales;f__GWC2-71-9;g__WVYX01;s__WVYX01 sp011772755	77.09	0.24	d__Bacteria;p__Gemmatimonadota;c__Gemmatimonadetes;o__Gemmatimonadales;f__GWC2-71-9;g__;s__	taxonomic classification defined by topology and ANI	N/A	N/A	88.94
	M3-10_Bin_172	Group3	Y	Yes	Gemmatimonadetes	d__Bacteria;p__Gemmatimonadota;c__Gemmatimonadetes;o__KS3-K002;f__JABDQB01;g__JABDQB01;s__	N	3.18404	3.49089	95	201271	64919	66.69	2915	3184039	2078	33516.2	Bohai Sea M3, China	Coastal Sediment	38.6675N/119.5475E	k__Bacteria (UID2495)	2993	147	91	24	120	3	0	0	0	91.21	3.3	0	d__Bacteria;p__Gemmatimonadota;c__Gemmatimonadetes;o__KS3-K002;f__JABDQB01;g__JABDQB01;s__	N/A	N/A	N/A	N/A	N/A	GCA_013042495.1	95	d__Bacteria;p__Gemmatimonadota;c__Gemmatimonadetes;o__KS3-K002;f__JABDQB01;g__JABDQB01;s__JABDQB01 sp013042495	77.76	0.29	d__Bacteria;p__Gemmatimonadota;c__Gemmatimonadetes;o__KS3-K002;f__JABDQB01;g__;s__	taxonomic classification defined by topology and ANI	N/A	N/A	86.14
	M3-10_Bin_176	Group3	Y	Yes	Gemmatimonadetes	d__Bacteria;p__Gemmatimonadota;c__Gemmatimonadetes;o__KS3-K002;f__JABDQB01;g__JABDQB01;s__	N	3.24218	3.59803	120	198080	53848	65.16	3026	3242183	2131	27018.2	Bohai Sea M3, China	Coastal Sediment	38.6675N/119.5475E	k__Bacteria (UID2495)	2993	147	91	25	120	2	0	0	0	90.11	2.2	0	d__Bacteria;p__Gemmatimonadota;c__Gemmatimonadetes;o__KS3-K002;f__JABDQB01;g__JABDQB01;s__	N/A	N/A	N/A	N/A	N/A	GCA_013042495.1	95	d__Bacteria;p__Gemmatimonadota;c__Gemmatimonadetes;o__KS3-K002;f__JABDQB01;g__JABDQB01;s__JABDQB01 sp013042495	79.59	0.59	d__Bacteria;p__Gemmatimonadota;c__Gemmatimonadetes;o__KS3-K002;f__JABDQB01;g__;s__	taxonomic classification defined by topology and ANI	N/A	N/A	84.57
	M3-10_Bin_190	Group2	Y	Yes	Gemmatimonadetes	d__Bacteria;p__Gemmatimonadota;c__Gemmatimonadetes;o__Gemmatimonadales;f__GWC2-71-9;g__WVYX01;s__	N	3.23859	3.31144	88	186205	68822	66.15	3010	3238585	2034	36802.1	Bohai Sea M3, China	Coastal Sediment	38.6675N/119.5475E	k__Bacteria (UID2495)	2993	147	91	2	143	2	0	0	0	97.8	2.2	0	d__Bacteria;p__Gemmatimonadota;c__Gemmatimonadetes;o__Gemmatimonadales;f__GWC2-71-9;g__WVYX01;s__	N/A	N/A	N/A	N/A	N/A	GCA_011772755.1	95	d__Bacteria;p__Gemmatimonadota;c__Gemmatimonadetes;o__Gemmatimonadales;f__GWC2-71-9;g__WVYX01;s__WVYX01 sp011772755	76.66	0.16	d__Bacteria;p__Gemmatimonadota;c__Gemmatimonadetes;o__Gemmatimonadales;f__GWC2-71-9;g__;s__	taxonomic classification defined by topology and ANI	N/A	N/A	92.89
	M3-10_Bin_201	Group4	Y	Yes	Gemmatimonadetes	d__Bacteria;p__Gemmatimonadota;c__Gemmatimonadetes;o__Longimicrobiales;f__UBA6960;g__;s__	N	3.31869	3.61947	495	36616	7955	66.9	3235	3318692	2001	6704.4	Bohai Sea M3, China	Coastal Sediment	38.6675N/119.5475E	k__Bacteria (UID2495)	2993	147	91	9	135	3	0	0	0	91.69	3.3	0	d__Bacteria;p__Gemmatimonadota;c__Gemmatimonadetes;o__Longimicrobiales;f__UBA6960;g__;s__	N/A	N/A	N/A	N/A	N/A	N/A	N/A	N/A	N/A	N/A	d__Bacteria;p__Gemmatimonadota;c__Gemmatimonadetes;o__Longimicrobiales;f__UBA6960;g__;s__	taxonomic classification fully defined by topology	N/A	N/A	79
	M3-10_Bin_215	Group4	Y	Yes	Gemmatimonadetes	d__Bacteria;p__Gemmatimonadota;c__Gemmatimonadetes;o__Longimicrobiales;f__UBA6960;g__SZUA-318;s__	N	5.15467	5.52246	756	41844	8714	68.23	4918	5154668	2000	6818.3	Bohai Sea M3, China	Coastal Sediment	38.6675N/119.5475E	k__Bacteria (UID2495)	2993	147	91	8	134	5	0	0	0	93.34	2.46	0	d__Bacteria;p__Gemmatimonadota;c__Gemmatimonadetes;o__Longimicrobiales;f__UBA6960;g__SZUA-318;s__	N/A	N/A	N/A	N/A	N/A	GCA_003248075.1	95	d__Bacteria;p__Gemmatimonadota;c__Gemmatimonadetes;o__Longimicrobiales;f__UBA6960;g__SZUA-318;s__SZUA-318 sp003248075	76.86	0.23	d__Bacteria;p__Gemmatimonadota;c__Gemmatimonadetes;o__Longimicrobiales;f__UBA6960;g__;s__	taxonomic classification defined by topology and ANI	N/A	N/A	79.69
	M3-10_Bin_224	Group4	Y	Yes	Gemmatimonadetes	d__Bacteria;p__Gemmatimonadota;c__Gemmatimonadetes;o__Longimicrobiales;f__UBA6960;g__;s__	N	5.88166	6.29661	600	103268	16626	67.71	5345	5881660	2018	9802.8	Bohai Sea M3, China	Coastal Sediment	38.6675N/119.5475E	k__Bacteria (UID2495)	2993	147	91	6	138	3	0	0	0	93.41	3.3	0	d__Bacteria;p__Gemmatimonadota;c__Gemmatimonadetes;o__Longimicrobiales;f__UBA6960;g__;s__	N/A	N/A	N/A	N/A	N/A	N/A	N/A	N/A	N/A	N/A	d__Bacteria;p__Gemmatimonadota;c__Gemmatimonadetes;o__Longimicrobiales;f__UBA6960;g__;s__	taxonomic classification fully defined by topology	N/A	N/A	83.5
	M3-10_Bin_235	Group2	N	Yes	Gemmatimonadetes	d__Bacteria;p__Gemmatimonadota;c__Gemmatimonadetes;o__Gemmatimonadales;f__GWC2-71-9;g__WVYX01;s__	N	3.36128	5.74283	854	19701	4201	66.5	3589	3361278	2000	3935.9	Bohai Sea M3, China	Coastal Sediment	38.6675N/119.5475E	k__Bacteria (UID2495)	2993	147	91	50	92	4	1	0	0	58.53	2.6	14.29	d__Bacteria;p__Gemmatimonadota;c__Gemmatimonadetes;o__Gemmatimonadales;f__GWC2-71-9;g__WVYX01;s__	N/A	N/A	N/A	N/A	N/A	GCA_011772755.1	95	d__Bacteria;p__Gemmatimonadota;c__Gemmatimonadetes;o__Gemmatimonadales;f__GWC2-71-9;g__WVYX01;s__WVYX01 sp011772755	75.82	0.11	d__Bacteria;p__Gemmatimonadota;c__Gemmatimonadetes;o__Gemmatimonadales;f__GWC2-71-9;g__;s__	taxonomic classification defined by topology and ANI	N/A	N/A	55.31
	M3-10_Bin_282	Group3	N	Yes	Gemmatimonadetes	d__Bacteria;p__Gemmatimonadota;c__Gemmatimonadetes;o__KS3-K002;f__KS3-K002;g__KS3-K002;s__	N	2.55009	4.49434	705	13861	3769	62.53	2766	2550087	2000	3617.1	Bohai Sea M3, China	Coastal Sediment	38.6675N/119.5475E	k__Bacteria (UID2495)	2993	147	91	55	86	6	0	0	0	56.74	5.49	33.33	d__Bacteria;p__Gemmatimonadota;c__Gemmatimonadetes;o__KS3-K002;f__KS3-K002;g__KS3-K002;s__	N/A	N/A	N/A	N/A	N/A	GCA_011774835.1	95	d__Bacteria;p__Gemmatimonadota;c__Gemmatimonadetes;o__KS3-K002;f__KS3-K002;g__KS3-K002;s__KS3-K002 sp011774835	76.83	0.17	d__Bacteria;p__Gemmatimonadota;c__Gemmatimonadetes;o__KS3-K002;f__;g__;s__	taxonomic classification defined by topology and ANI	N/A	N/A	49.67
	M3-10_Bin_287	Group3	Y	Yes	Gemmatimonadetes	d__Bacteria;p__Gemmatimonadota;c__Gemmatimonadetes;o__KS3-K002;f__JABDQB01;g__JABDQB01;s__	N	2.72982	2.8259	360	75670	11368	65.85	2809	2729819	2003	7582.8	Bohai Sea M3, China	Coastal Sediment	38.6675N/119.5475E	k__Bacteria (UID2495)	2993	147	91	4	138	5	0	0	0	96.6	4.46	20	d__Bacteria;p__Gemmatimonadota;c__Gemmatimonadetes;o__KS3-K002;f__JABDQB01;g__JABDQB01;s__	N/A	N/A	N/A	N/A	N/A	GCA_013042495.1	95	d__Bacteria;p__Gemmatimonadota;c__Gemmatimonadetes;o__KS3-K002;f__JABDQB01;g__JABDQB01;s__JABDQB01 sp013042495	79.61	0.48	d__Bacteria;p__Gemmatimonadota;c__Gemmatimonadetes;o__KS3-K002;f__JABDQB01;g__;s__	taxonomic classification defined by topology and ANI	N/A	N/A	92.52
	M3-10_Bin_288	Group3	Y	Yes	Gemmatimonadetes	d__Bacteria;p__Gemmatimonadota;c__Gemmatimonadetes;o__KS3-K002;f__JABDQB01;g__;s__	N	3.92548	4.05944	357	83559	16269	65.08	3696	3925477	2019	10995.7	Bohai Sea M3, China	Coastal Sediment	38.6675N/119.5475E	k__Bacteria (UID2495)	2993	147	91	3	140	4	0	0	0	96.7	4.4	50	d__Bacteria;p__Gemmatimonadota;c__Gemmatimonadetes;o__KS3-K002;f__JABDQB01;g__;s__	N/A	N/A	N/A	N/A	N/A	N/A	N/A	N/A	N/A	N/A	d__Bacteria;p__Gemmatimonadota;c__Gemmatimonadetes;o__KS3-K002;f__JABDQB01;g__;s__	taxonomic novelty determined using RED	N/A	N/A	90.81
	M3-10_Bin_308	Group4	N	Yes	Gemmatimonadetes	d__Bacteria;p__Gemmatimonadota;c__Gemmatimonadetes;o__Longimicrobiales;f__UBA6960;g__UBA2589;s__	N	3.33883	4.90788	942	23558	3611	67.27	3616	3338832	2001	3544.4	Bohai Sea M3, China	Coastal Sediment	38.6675N/119.5475E	k__Bacteria (UID2495)	2993	147	91	35	106	6	0	0	0	68.03	5.59	16.67	d__Bacteria;p__Gemmatimonadota;c__Gemmatimonadetes;o__Longimicrobiales;f__UBA6960;g__UBA2589;s__	N/A	N/A	N/A	N/A	N/A	N/A	N/A	N/A	N/A	N/A	d__Bacteria;p__Gemmatimonadota;c__Gemmatimonadetes;o__Longimicrobiales;f__UBA6960;g__UBA2589;s__	ANI	N/A	GCA_002390225.1, s__UBA2589 sp002390225, 95.0, 77.02, 0.16; GCA_013002885.1, s__UBA2589 sp013002885, 95.0, 76.9, 0.2; GCA_002348465.1, s__UBA2589 sp002348465, 95.0, 76.67, 0.02; GCA_002348265.1, s__UBA2589 sp002348265, 95.0, 76.11, 0.03; GCA_002500925.1, s__UBA2589 sp002500925, 95.0, 75.93, 0.03	57.75
	M3-10_Bin_313	Group1	N	Yes	Gemmatimonadetes	d__Bacteria;p__Gemmatimonadota;c__Gemmatimonadetes;o__JACCXV01;f__;g__;s__	N	1.54877	2.22877	421	11828	3865	62.22	1850	1548773	2003	3678.8	Bohai Sea M3, China	Coastal Sediment	38.6675N/119.5475E	k__Bacteria (UID2495)	2993	147	91	38	106	3	0	0	0	69.49	2.38	33.33	d__Bacteria;p__Gemmatimonadota;c__Gemmatimonadetes;o__JACCXV01;f__;g__;s__	N/A	N/A	N/A	N/A	N/A	GCA_013696835.1	95	d__Bacteria;p__Gemmatimonadota;c__Gemmatimonadetes;o__JACCXV01;f__JACCXV01;g__JACCXV01;s__JACCXV01 sp013696835	75.46	0.01	d__Bacteria;p__Gemmatimonadota;c__Gemmatimonadetes;o__;f__;g__;s__	taxonomic classification defined by topology and ANI	N/A	N/A	55.63
	M3-10_Bin_35	Group3	Y	Yes	Gemmatimonadetes	d__Bacteria;p__Gemmatimonadota;c__Gemmatimonadetes;o__KS3-K002;f__KS3-K002;g__KS3-K002;s__	N	3.48643	4.32828	701	33573	5905	64.51	3585	3486427	2001	4973.5	Bohai Sea M3, China	Coastal Sediment	38.6675N/119.5475E	k__Bacteria (UID2495)	2993	147	91	30	113	4	0	0	0	80.55	4.4	0	d__Bacteria;p__Gemmatimonadota;c__Gemmatimonadetes;o__KS3-K002;f__KS3-K002;g__KS3-K002;s__	N/A	N/A	N/A	N/A	N/A	GCA_011774835.1	95	d__Bacteria;p__Gemmatimonadota;c__Gemmatimonadetes;o__KS3-K002;f__KS3-K002;g__KS3-K002;s__KS3-K002 sp011774835	77.57	0.25	d__Bacteria;p__Gemmatimonadota;c__Gemmatimonadetes;o__KS3-K002;f__;g__;s__	taxonomic classification defined by topology and ANI	N/A	N/A	67.28
	M3-10_Bin_79	Group4	N	Yes	Gemmatimonadetes	d__Bacteria;p__Gemmatimonadota;c__Gemmatimonadetes;o__Longimicrobiales;f__UBA6960;g__;s__	N	2.8392	5.19809	746	25540	3921	68.12	3025	2839196	2000	3805.9	Bohai Sea M3, China	Coastal Sediment	38.6675N/119.5475E	k__Bacteria (UID2495)	2993	147	91	70	75	2	0	0	0	54.62	2.2	0	d__Bacteria;p__Gemmatimonadota;c__Gemmatimonadetes;o__Longimicrobiales;f__UBA6960;g__;s__	N/A	N/A	N/A	N/A	N/A	GCA_002346665.1	95	d__Bacteria;p__Gemmatimonadota;c__Gemmatimonadetes;o__Longimicrobiales;f__UBA6960;g__UBA2988;s__UBA2988 sp002346665	74.93	0.02	d__Bacteria;p__Gemmatimonadota;c__Gemmatimonadetes;o__Longimicrobiales;f__UBA6960;g__;s__	taxonomic classification defined by topology and ANI	N/A	N/A	41.2
	M3-10_Bin_84	Group3	N	Yes	Gemmatimonadetes	d__Bacteria;p__Gemmatimonadota;c__Gemmatimonadetes;o__KS3-K002;f__JABDQB01;g__;s__	N	2.84236	3.87613	543	30673	6211	64.9	3122	2842364	2003	5234.6	Bohai Sea M3, China	Coastal Sediment	38.6675N/119.5475E	k__Bacteria (UID2495)	2993	147	91	35	109	3	0	0	0	73.33	3.3	33.33	d__Bacteria;p__Gemmatimonadota;c__Gemmatimonadetes;o__KS3-K002;f__JABDQB01;g__;s__	N/A	N/A	N/A	N/A	N/A	N/A	N/A	N/A	N/A	N/A	d__Bacteria;p__Gemmatimonadota;c__Gemmatimonadetes;o__KS3-K002;f__JABDQB01;g__;s__	taxonomic novelty determined using RED	N/A	N/A	61.84
	M3-22_Bin_132_1	Group3	N	Yes	Gemmatimonadetes	d__Bacteria;p__Gemmatimonadota;c__Gemmatimonadetes;o__KS3-K002;f__JABDQB01;g__;s__	N	2.64814	4.35836	380	27028	8139	65.06	2595	2648137	2022	6968.8	Bohai Sea M3, China	Coastal Sediment	38.6675N/119.5475E	k__Bacteria (UID2495)	2993	147	91	57	85	5	0	0	0	60.76	4.5	20	d__Bacteria;p__Gemmatimonadota;c__Gemmatimonadetes;o__KS3-K002;f__JABDQB01;g__;s__	N/A	N/A	N/A	N/A	N/A	N/A	N/A	N/A	N/A	N/A	d__Bacteria;p__Gemmatimonadota;c__Gemmatimonadetes;o__KS3-K002;f__JABDQB01;g__;s__	taxonomic novelty determined using RED	N/A	N/A	53.42
	M3-22_Bin_132_2	Group3	N	Yes	Gemmatimonadetes	d__Bacteria;p__Gemmatimonadota;c__Gemmatimonadetes;o__KS3-K002;f__JABDQB01;g__;s__	N	3.10035	4.23776	397	29057	10059	66.12	2946	3100347	2035	7809.4	Bohai Sea M3, China	Coastal Sediment	38.6675N/119.5475E	k__Bacteria (UID2495)	2993	147	91	58	85	4	0	0	0	73.16	4.4	25	d__Bacteria;p__Gemmatimonadota;c__Gemmatimonadetes;o__KS3-K002;f__JABDQB01;g__;s__	N/A	N/A	N/A	N/A	N/A	N/A	N/A	N/A	N/A	N/A	d__Bacteria;p__Gemmatimonadota;c__Gemmatimonadetes;o__KS3-K002;f__JABDQB01;g__;s__	taxonomic novelty determined using RED	N/A	N/A	56.46
	M3-22_Bin_137	Group2	N	Yes	Gemmatimonadetes	d__Bacteria;p__Gemmatimonadota;c__Gemmatimonadetes;o__Gemmatimonadales;f__GWC2-71-9;g__WVYX01;s__	N	2.12694	3.87349	670	13362	3172	63.03	2475	2126935	2001	3174.5	Bohai Sea M3, China	Coastal Sediment	38.6675N/119.5475E	k__Bacteria (UID2495)	2993	147	91	68	69	10	0	0	0	54.91	6.91	0	d__Bacteria;p__Gemmatimonadota;c__Gemmatimonadetes;o__Gemmatimonadales;f__GWC2-71-9;g__WVYX01;s__	N/A	N/A	N/A	N/A	N/A	GCA_011772755.1	95	d__Bacteria;p__Gemmatimonadota;c__Gemmatimonadetes;o__Gemmatimonadales;f__GWC2-71-9;g__WVYX01;s__WVYX01 sp011772755	75.85	0.06	d__Bacteria;p__Gemmatimonadota;c__Gemmatimonadetes;o__Gemmatimonadales;f__GWC2-71-9;g__;s__	taxonomic classification defined by topology and ANI	N/A	N/A	39.69
	M3-22_Bin_161	Group4	N	Yes	Gemmatimonadetes	d__Bacteria;p__Gemmatimonadota;c__Gemmatimonadetes;o__Longimicrobiales;f__UBA6960;g__UBA2589;s__	N	4.75645	5.55919	921	25410	6008	67.22	4863	4756445	2000	5164.4	Bohai Sea M3, China	Coastal Sediment	38.6675N/119.5475E	k__Bacteria (UID2495)	2993	147	91	21	113	13	0	0	0	85.56	8.79	23.08	d__Bacteria;p__Gemmatimonadota;c__Gemmatimonadetes;o__Longimicrobiales;f__UBA6960;g__UBA2589;s__	N/A	N/A	N/A	N/A	N/A	N/A	N/A	N/A	N/A	N/A	d__Bacteria;p__Gemmatimonadota;c__Gemmatimonadetes;o__Longimicrobiales;f__UBA6960;g__UBA2589;s__	ANI	N/A	GCA_002390225.1, s__UBA2589 sp002390225, 95.0, 77.22, 0.17; GCA_013002885.1, s__UBA2589 sp013002885, 95.0, 76.92, 0.19; GCA_002500925.1, s__UBA2589 sp002500925, 95.0, 75.85, 0.04; GCA_002348465.1, s__UBA2589 sp002348465, 95.0, 75.69, 0.05; GCA_002348265.1, s__UBA2589 sp002348265, 95.0, 75.69, 0.03	72.27
	M3-22_Bin_179	Group3	Y	Yes	Gemmatimonadetes	d__Bacteria;p__Gemmatimonadota;c__Gemmatimonadetes;o__KS3-K002;f__JABDQB01;g__;s__	N	3.80084	4.16714	432	56960	12644	65.08	3621	3800844	2007	8798.3	Bohai Sea M3, China	Coastal Sediment	38.6675N/119.5475E	k__Bacteria (UID2495)	2993	147	91	9	135	3	0	0	0	91.21	3.3	33.33	d__Bacteria;p__Gemmatimonadota;c__Gemmatimonadetes;o__KS3-K002;f__JABDQB01;g__;s__	N/A	N/A	N/A	N/A	N/A	N/A	N/A	N/A	N/A	N/A	d__Bacteria;p__Gemmatimonadota;c__Gemmatimonadetes;o__KS3-K002;f__JABDQB01;g__;s__	taxonomic novelty determined using RED	N/A	N/A	88.05
	M3-22_Bin_184	Group4	Y	Yes	Gemmatimonadetes	d__Bacteria;p__Gemmatimonadota;c__Gemmatimonadetes;o__Longimicrobiales;f__UBA6960;g__SZUA-318;s__	N	4.90839	5.55499	798	44429	7619	68.25	4803	4908386	2002	6150.9	Bohai Sea M3, China	Coastal Sediment	38.6675N/119.5475E	k__Bacteria (UID2495)	2993	147	91	14	130	3	0	0	0	88.36	2.3	33.33	d__Bacteria;p__Gemmatimonadota;c__Gemmatimonadetes;o__Longimicrobiales;f__UBA6960;g__SZUA-318;s__	N/A	N/A	N/A	N/A	N/A	GCA_003248075.1	95	d__Bacteria;p__Gemmatimonadota;c__Gemmatimonadetes;o__Longimicrobiales;f__UBA6960;g__SZUA-318;s__SZUA-318 sp003248075	76.96	0.24	d__Bacteria;p__Gemmatimonadota;c__Gemmatimonadetes;o__Longimicrobiales;f__UBA6960;g__;s__	taxonomic classification defined by topology and ANI	N/A	N/A	74.25
	M3-22_Bin_185	Group2	Y	Yes	Gemmatimonadetes	d__Bacteria;p__Gemmatimonadota;c__Gemmatimonadetes;o__Gemmatimonadales;f__GWC2-71-9;g__WVYX01;s__	N	3.50348	3.71998	150	115678	50665	67.34	3284	3503481	2003	23356.5	Bohai Sea M3, China	Coastal Sediment	38.6675N/119.5475E	k__Bacteria (UID2495)	2993	147	91	20	123	4	0	0	0	94.18	4.4	25	d__Bacteria;p__Gemmatimonadota;c__Gemmatimonadetes;o__Gemmatimonadales;f__GWC2-71-9;g__WVYX01;s__	N/A	N/A	N/A	N/A	N/A	GCA_011772755.1	95	d__Bacteria;p__Gemmatimonadota;c__Gemmatimonadetes;o__Gemmatimonadales;f__GWC2-71-9;g__WVYX01;s__WVYX01 sp011772755	77.01	0.2	d__Bacteria;p__Gemmatimonadota;c__Gemmatimonadetes;o__Gemmatimonadales;f__GWC2-71-9;g__;s__	taxonomic classification defined by topology and ANI	N/A	N/A	85.41
	M3-22_Bin_190	Group4	Y	Yes	Gemmatimonadetes	d__Bacteria;p__Gemmatimonadota;c__Gemmatimonadetes;o__Longimicrobiales;f__UBA6960;g__;s__	N	4.09551	4.8013	483	45940	11416	68.32	3823	4095509	2000	8479.3	Bohai Sea M3, China	Coastal Sediment	38.6675N/119.5475E	k__Bacteria (UID2495)	2993	147	91	20	123	4	0	0	0	85.3	3.36	25	d__Bacteria;p__Gemmatimonadota;c__Gemmatimonadetes;o__Longimicrobiales;f__UBA6960;g__;s__	N/A	N/A	N/A	N/A	N/A	GCA_002346665.1	95	d__Bacteria;p__Gemmatimonadota;c__Gemmatimonadetes;o__Longimicrobiales;f__UBA6960;g__UBA2988;s__UBA2988 sp002346665	75.77	0.04	d__Bacteria;p__Gemmatimonadota;c__Gemmatimonadetes;o__Longimicrobiales;f__UBA6960;g__;s__	taxonomic classification defined by topology and ANI	N/A	N/A	72.62
	M3-22_Bin_195	Group2	N	Yes	Gemmatimonadetes	d__Bacteria;p__Gemmatimonadota;c__Gemmatimonadetes;o__Gemmatimonadales;f__GWC2-71-9;g__WVYX01;s__	N	3.05157	4.13212	550	29097	7327	65.64	3155	3051573	2000	5548.3	Bohai Sea M3, China	Coastal Sediment	38.6675N/119.5475E	k__Bacteria (UID2495)	2993	147	91	32	113	2	0	0	0	73.85	1.2	0	d__Bacteria;p__Gemmatimonadota;c__Gemmatimonadetes;o__Gemmatimonadales;f__GWC2-71-9;g__WVYX01;s__	N/A	N/A	N/A	N/A	N/A	GCA_011772755.1	95	d__Bacteria;p__Gemmatimonadota;c__Gemmatimonadetes;o__Gemmatimonadales;f__GWC2-71-9;g__WVYX01;s__WVYX01 sp011772755	75.65	0.09	d__Bacteria;p__Gemmatimonadota;c__Gemmatimonadetes;o__Gemmatimonadales;f__GWC2-71-9;g__;s__	taxonomic classification defined by topology and ANI	N/A	N/A	64.28
	M3-22_Bin_198	Group2	Y	Yes	Gemmatimonadetes	d__Bacteria;p__Gemmatimonadota;c__Gemmatimonadetes;o__Gemmatimonadales;f__GWC2-71-9;g__WVYX01;s__	N	3.21768	3.38347	148	125706	39843	66.2	3040	3217676	2131	21741.1	Bohai Sea M3, China	Coastal Sediment	38.6675N/119.5475E	k__Bacteria (UID2495)	2993	147	91	9	136	2	0	0	0	95.1	2.2	0	d__Bacteria;p__Gemmatimonadota;c__Gemmatimonadetes;o__Gemmatimonadales;f__GWC2-71-9;g__WVYX01;s__	N/A	N/A	N/A	N/A	N/A	GCA_011772755.1	95	d__Bacteria;p__Gemmatimonadota;c__Gemmatimonadetes;o__Gemmatimonadales;f__GWC2-71-9;g__WVYX01;s__WVYX01 sp011772755	76.71	0.16	d__Bacteria;p__Gemmatimonadota;c__Gemmatimonadetes;o__Gemmatimonadales;f__GWC2-71-9;g__;s__	taxonomic classification defined by topology and ANI	N/A	N/A	90.87
	M3-22_Bin_205	Group3	Y	Yes	Gemmatimonadetes	d__Bacteria;p__Gemmatimonadota;c__Gemmatimonadetes;o__KS3-K002;f__JABDQB01;g__JABDQB01;s__	N	3.30443	3.41719	106	237931	64673	65.17	3056	3304425	2030	31173.8	Bohai Sea M3, China	Coastal Sediment	38.6675N/119.5475E	k__Bacteria (UID2495)	2993	147	91	3	141	3	0	0	0	96.7	3.3	0	d__Bacteria;p__Gemmatimonadota;c__Gemmatimonadetes;o__KS3-K002;f__JABDQB01;g__JABDQB01;s__	N/A	N/A	N/A	N/A	N/A	GCA_013042495.1	95	d__Bacteria;p__Gemmatimonadota;c__Gemmatimonadetes;o__KS3-K002;f__JABDQB01;g__JABDQB01;s__JABDQB01 sp013042495	79.67	0.61	d__Bacteria;p__Gemmatimonadota;c__Gemmatimonadetes;o__KS3-K002;f__JABDQB01;g__;s__	taxonomic classification defined by topology and ANI	N/A	N/A	92.26
	M3-22_Bin_216	Group2	N	Yes	Gemmatimonadetes	d__Bacteria;p__Gemmatimonadota;c__Gemmatimonadetes;o__Gemmatimonadales;f__GWC2-71-9;g__WVYX01;s__	N	3.62158	5.59404	828	21348	4836	66.65	3825	3621584	2002	4373.9	Bohai Sea M3, China	Coastal Sediment	38.6675N/119.5475E	k__Bacteria (UID2495)	2993	147	91	56	88	3	0	0	0	64.74	3.3	0	d__Bacteria;p__Gemmatimonadota;c__Gemmatimonadetes;o__Gemmatimonadales;f__GWC2-71-9;g__WVYX01;s__	N/A	N/A	N/A	N/A	N/A	GCA_011772755.1	95	d__Bacteria;p__Gemmatimonadota;c__Gemmatimonadetes;o__Gemmatimonadales;f__GWC2-71-9;g__WVYX01;s__WVYX01 sp011772755	76.33	0.1	d__Bacteria;p__Gemmatimonadota;c__Gemmatimonadetes;o__Gemmatimonadales;f__GWC2-71-9;g__;s__	taxonomic classification defined by topology and ANI	N/A	N/A	50.43
	M3-22_Bin_219	Group4	Y	Yes	Gemmatimonadetes	d__Bacteria;p__Gemmatimonadota;c__Gemmatimonadetes;o__Longimicrobiales;f__UBA6960;g__;s__	N	2.89775	3.19276	390	46854	9927	66.22	2865	2897751	2006	7430.1	Bohai Sea M3, China	Coastal Sediment	38.6675N/119.5475E	k__Bacteria (UID2495)	2993	147	91	13	132	2	0	0	0	90.76	2.2	0	d__Bacteria;p__Gemmatimonadota;c__Gemmatimonadetes;o__Longimicrobiales;f__UBA6960;g__;s__	N/A	N/A	N/A	N/A	N/A	N/A	N/A	N/A	N/A	N/A	d__Bacteria;p__Gemmatimonadota;c__Gemmatimonadetes;o__Longimicrobiales;f__UBA6960;g__;s__	taxonomic classification fully defined by topology	N/A	N/A	77.96
	M3-22_Bin_243	Group4	N	Yes	Gemmatimonadetes	d__Bacteria;p__Gemmatimonadota;c__Gemmatimonadetes;o__Longimicrobiales;f__UBA6960;g__;s__	N	2.44382	3.45857	614	16928	4190	66.9	2594	2443823	2003	3980.2	Bohai Sea M3, China	Coastal Sediment	38.6675N/119.5475E	k__Bacteria (UID2495)	2993	147	91	37	107	3	0	0	0	70.66	2.75	0	d__Bacteria;p__Gemmatimonadota;c__Gemmatimonadetes;o__Longimicrobiales;f__UBA6960;g__;s__	N/A	N/A	N/A	N/A	N/A	N/A	N/A	N/A	N/A	N/A	d__Bacteria;p__Gemmatimonadota;c__Gemmatimonadetes;o__Longimicrobiales;f__UBA6960;g__;s__	taxonomic classification fully defined by topology	N/A	N/A	62.68
	M3-22_Bin_290	Group3	Y	Yes	Gemmatimonadetes	d__Bacteria;p__Gemmatimonadota;c__Gemmatimonadetes;o__KS3-K002;f__JABDQB01;g__JABDQB01;s__	N	3.16104	3.26891	87	246972	59815	66.66	2911	3161040	2278	36333.8	Bohai Sea M3, China	Coastal Sediment	38.6675N/119.5475E	k__Bacteria (UID2495)	2993	147	91	3	141	3	0	0	0	96.7	3.3	0	d__Bacteria;p__Gemmatimonadota;c__Gemmatimonadetes;o__KS3-K002;f__JABDQB01;g__JABDQB01;s__	N/A	N/A	N/A	N/A	N/A	GCA_013042495.1	95	d__Bacteria;p__Gemmatimonadota;c__Gemmatimonadetes;o__KS3-K002;f__JABDQB01;g__JABDQB01;s__JABDQB01 sp013042495	77.9	0.29	d__Bacteria;p__Gemmatimonadota;c__Gemmatimonadetes;o__KS3-K002;f__JABDQB01;g__;s__	taxonomic classification defined by topology and ANI	N/A	N/A	93.63
	M3-22_Bin_2	Group2	N	Yes	Gemmatimonadetes	d__Bacteria;p__Gemmatimonadota;c__Gemmatimonadetes;o__Gemmatimonadales;f__GWC2-71-9;g__WVYX01;s__	N	2.78708	4.60293	715	18142	4157	66.42	3072	2787077	2001	3898	Bohai Sea M3, China	Coastal Sediment	38.6675N/119.5475E	k__Bacteria (UID2495)	2993	147	91	54	92	1	0	0	0	60.55	1.1	0	d__Bacteria;p__Gemmatimonadota;c__Gemmatimonadetes;o__Gemmatimonadales;f__GWC2-71-9;g__WVYX01;s__	N/A	N/A	N/A	N/A	N/A	GCA_011772755.1	95	d__Bacteria;p__Gemmatimonadota;c__Gemmatimonadetes;o__Gemmatimonadales;f__GWC2-71-9;g__WVYX01;s__WVYX01 sp011772755	76.66	0.13	d__Bacteria;p__Gemmatimonadota;c__Gemmatimonadetes;o__Gemmatimonadales;f__GWC2-71-9;g__;s__	taxonomic classification defined by topology and ANI	N/A	N/A	56.01
	M3-22_Bin_33	Group2	N	Yes	Gemmatimonadetes	d__Bacteria;p__Gemmatimonadota;c__Gemmatimonadetes;o__Gemmatimonadales;f__GWC2-71-9;g__WVYX01;s__	N	5.19923	5.92707	630	95940	11818	59.37	5051	5199227	2003	8252.7	Bohai Sea M3, China	Coastal Sediment	38.6675N/119.5475E	k__Bacteria (UID2495)	2993	147	91	14	126	7	0	0	0	87.72	7.14	14.29	d__Bacteria;p__Gemmatimonadota;c__Gemmatimonadetes;o__Gemmatimonadales;f__GWC2-71-9;g__WVYX01;s__	N/A	N/A	N/A	N/A	N/A	GCA_011772755.1	95	d__Bacteria;p__Gemmatimonadota;c__Gemmatimonadetes;o__Gemmatimonadales;f__GWC2-71-9;g__WVYX01;s__WVYX01 sp011772755	76.93	0.05	d__Bacteria;p__Gemmatimonadota;c__Gemmatimonadetes;o__Gemmatimonadales;f__GWC2-71-9;g__;s__	taxonomic classification defined by topology and ANI	N/A	N/A	75.96
	M3-22_Bin_35	Group3	Y	Yes	Gemmatimonadetes	d__Bacteria;p__Gemmatimonadota;c__Gemmatimonadetes;o__KS3-K002;f__KS3-K002;g__KS3-K002;s__	N	3.95309	4.77023	601	48481	8010	64.36	3984	3953089	2006	6577.5	Bohai Sea M3, China	Coastal Sediment	38.6675N/119.5475E	k__Bacteria (UID2495)	2993	147	91	20	124	3	0	0	0	82.87	3.3	0	d__Bacteria;p__Gemmatimonadota;c__Gemmatimonadetes;o__KS3-K002;f__KS3-K002;g__KS3-K002;s__	N/A	N/A	N/A	N/A	N/A	GCA_011774835.1	95	d__Bacteria;p__Gemmatimonadota;c__Gemmatimonadetes;o__KS3-K002;f__KS3-K002;g__KS3-K002;s__KS3-K002 sp011774835	77.35	0.24	d__Bacteria;p__Gemmatimonadota;c__Gemmatimonadetes;o__KS3-K002;f__;g__;s__	taxonomic classification defined by topology and ANI	N/A	N/A	76.59
	M3-22_Bin_62	Group4	Y	Yes	Gemmatimonadetes	d__Bacteria;p__Gemmatimonadota;c__Gemmatimonadetes;o__Longimicrobiales;f__UBA6960;g__;s__	N	6.62275	6.92756	461	115978	29044	67.72	5870	6622752	2001	14366.1	Bohai Sea M3, China	Coastal Sediment	38.6675N/119.5475E	k__Bacteria (UID2495)	2993	147	91	4	140	3	0	0	0	95.6	2.75	33.33	d__Bacteria;p__Gemmatimonadota;c__Gemmatimonadetes;o__Longimicrobiales;f__UBA6960;g__;s__	N/A	N/A	N/A	N/A	N/A	N/A	N/A	N/A	N/A	N/A	d__Bacteria;p__Gemmatimonadota;c__Gemmatimonadetes;o__Longimicrobiales;f__UBA6960;g__;s__	taxonomic classification fully defined by topology	N/A	N/A	89.5
	M3-22_Bin_63	Group2	Y	Yes	Gemmatimonadetes	d__Bacteria;p__Gemmatimonadota;c__Gemmatimonadetes;o__Gemmatimonadales;f__GWC2-71-9;g__WVYX01;s__	N	3.48313	3.63621	285	97866	25616	66.71	3360	3483129	2001	12221.5	Bohai Sea M3, China	Coastal Sediment	38.6675N/119.5475E	k__Bacteria (UID2495)	2993	147	91	5	138	4	0	0	0	95.79	4.4	0	d__Bacteria;p__Gemmatimonadota;c__Gemmatimonadetes;o__Gemmatimonadales;f__GWC2-71-9;g__WVYX01;s__	N/A	N/A	N/A	N/A	N/A	GCA_011772755.1	95	d__Bacteria;p__Gemmatimonadota;c__Gemmatimonadetes;o__Gemmatimonadales;f__GWC2-71-9;g__WVYX01;s__WVYX01 sp011772755	77.02	0.23	d__Bacteria;p__Gemmatimonadota;c__Gemmatimonadetes;o__Gemmatimonadales;f__GWC2-71-9;g__;s__	taxonomic classification defined by topology and ANI	N/A	N/A	90.11
	M3-22_Bin_65	Group3	Y	Yes	Gemmatimonadetes	d__Bacteria;p__Gemmatimonadota;c__Gemmatimonadetes;o__KS3-K002;f__;g__;s__	N	3.63084	4.15904	433	77743	14629	63.98	3631	3630841	2004	8385.3	Bohai Sea M3, China	Coastal Sediment	38.6675N/119.5475E	k__Bacteria (UID2495)	2993	147	91	13	130	4	0	0	0	87.3	3.85	25	d__Bacteria;p__Gemmatimonadota;c__Gemmatimonadetes;o__KS3-K002;f__;g__;s__	N/A	N/A	N/A	N/A	N/A	N/A	N/A	N/A	N/A	N/A	d__Bacteria;p__Gemmatimonadota;c__Gemmatimonadetes;o__KS3-K002;f__;g__;s__	taxonomic novelty determined using RED	N/A	N/A	83.66
	M3-22_Bin_71	Group3	Y	Yes	Gemmatimonadetes	d__Bacteria;p__Gemmatimonadota;c__Gemmatimonadetes;o__KS3-K002;f__JABDQB01;g__JABDQB01;s__	N	3.2262	3.29878	302	89872	20993	65.68	3176	3226203	2007	10682.8	Bohai Sea M3, China	Coastal Sediment	38.6675N/119.5475E	k__Bacteria (UID2495)	2993	147	91	2	142	3	0	0	0	97.8	3.3	0	d__Bacteria;p__Gemmatimonadota;c__Gemmatimonadetes;o__KS3-K002;f__JABDQB01;g__JABDQB01;s__	N/A	N/A	N/A	N/A	N/A	GCA_013042495.1	95	d__Bacteria;p__Gemmatimonadota;c__Gemmatimonadetes;o__KS3-K002;f__JABDQB01;g__JABDQB01;s__JABDQB01 sp013042495	79.7	0.57	d__Bacteria;p__Gemmatimonadota;c__Gemmatimonadetes;o__KS3-K002;f__JABDQB01;g__;s__	taxonomic classification defined by topology and ANI	N/A	N/A	90.67
	M3-22_Bin_80	Group4	N	Yes	Gemmatimonadetes	d__Bacteria;p__Gemmatimonadota;c__Gemmatimonadetes;o__Longimicrobiales;f__UBA6960;g__JABDNZ01;s__	N	5.36619	5.55966	585	114245	14185	63.01	4889	5366186	2015	9173	Bohai Sea M3, China	Coastal Sediment	38.6675N/119.5475E	k__Bacteria (UID2495)	2993	147	91	4	138	5	0	0	0	96.52	5.49	0	d__Bacteria;p__Gemmatimonadota;c__Gemmatimonadetes;o__Longimicrobiales;f__UBA6960;g__JABDNZ01;s__	N/A	N/A	N/A	N/A	N/A	GCA_013043565.1	95	d__Bacteria;p__Gemmatimonadota;c__Gemmatimonadetes;o__Longimicrobiales;f__UBA6960;g__JABDNZ01;s__JABDNZ01 sp013043565	77.03	0.18	d__Bacteria;p__Gemmatimonadota;c__Gemmatimonadetes;o__Longimicrobiales;f__UBA6960;g__;s__	taxonomic classification defined by topology and ANI	N/A	N/A	86.9
	M3-22_Bin_97	Group3	N	Yes	Gemmatimonadetes	d__Bacteria;p__Gemmatimonadota;c__Gemmatimonadetes;o__KS3-K002;f__KS3-K002;g__KS3-K002;s__	N	2.50483	3.62389	605	17376	4466	63.32	2658	2504830	2001	4140.2	Bohai Sea M3, China	Coastal Sediment	38.6675N/119.5475E	k__Bacteria (UID2495)	2993	147	91	43	91	13	0	0	0	69.12	6.12	0	d__Bacteria;p__Gemmatimonadota;c__Gemmatimonadetes;o__KS3-K002;f__KS3-K002;g__KS3-K002;s__	N/A	N/A	N/A	N/A	N/A	GCA_011774835.1	95	d__Bacteria;p__Gemmatimonadota;c__Gemmatimonadetes;o__KS3-K002;f__KS3-K002;g__KS3-K002;s__KS3-K002 sp011774835	76.45	0.2	d__Bacteria;p__Gemmatimonadota;c__Gemmatimonadetes;o__KS3-K002;f__;g__;s__	taxonomic classification defined by topology and ANI	N/A	N/A	56.52
	M3-2_Bin_151	Group4	N	Yes	Gemmatimonadetes	d__Bacteria;p__Gemmatimonadota;c__Gemmatimonadetes;o__Longimicrobiales;f__UBA6960;g__;s__	N	4.15014	4.1963	197	366549	61664	65.39	3612	4150138	2009	21066.7	Bohai Sea M3, China	Coastal Sediment	38.6675N/119.5475E	k__Bacteria (UID2495)	2993	147	91	1	140	6	0	0	0	98.9	6.59	0	d__Bacteria;p__Gemmatimonadota;c__Gemmatimonadetes;o__Longimicrobiales;f__UBA6960;g__;s__	N/A	N/A	N/A	N/A	N/A	N/A	N/A	N/A	N/A	N/A	d__Bacteria;p__Gemmatimonadota;c__Gemmatimonadetes;o__Longimicrobiales;f__UBA6960;g__;s__	taxonomic classification fully defined by topology	N/A	N/A	90.07
	M3-2_Bin_168	Group4	N	Yes	Gemmatimonadetes	d__Bacteria;p__Gemmatimonadota;c__Gemmatimonadetes;o__Longimicrobiales;f__UBA6960;g__UBA2589;s__	N	3.55912	4.38748	609	42892	7220	64.5	3659	3559120	2006	5844.2	Bohai Sea M3, China	Coastal Sediment	38.6675N/119.5475E	k__Bacteria (UID2495)	2993	147	91	24	118	5	0	0	0	81.12	5.49	0	d__Bacteria;p__Gemmatimonadota;c__Gemmatimonadetes;o__Longimicrobiales;f__UBA6960;g__UBA2589;s__	N/A	N/A	N/A	N/A	N/A	N/A	N/A	N/A	N/A	N/A	d__Bacteria;p__Gemmatimonadota;c__Gemmatimonadetes;o__Longimicrobiales;f__UBA6960;g__UBA2589;s__	ANI	N/A	GCA_013002885.1, s__UBA2589 sp013002885, 95.0, 76.95, 0.18; GCA_002390225.1, s__UBA2589 sp002390225, 95.0, 76.92, 0.18; GCA_002348465.1, s__UBA2589 sp002348465, 95.0, 76.32, 0.06; GCA_002500925.1, s__UBA2589 sp002500925, 95.0, 76.28, 0.04; GCA_002348265.1, s__UBA2589 sp002348265, 95.0, 75.75, 0.03	67.88
	M3-2_Bin_177	Group4	Y	Yes	Gemmatimonadetes	d__Bacteria;p__Gemmatimonadota;c__Gemmatimonadetes;o__Longimicrobiales;f__UBA6960;g__;s__	N	4.40623	4.63863	410	67837	18762	63.93	4205	4406230	2003	10746.9	Bohai Sea M3, China	Coastal Sediment	38.6675N/119.5475E	k__Bacteria (UID2495)	2993	147	91	7	137	3	0	0	0	94.99	2.3	33.33	d__Bacteria;p__Gemmatimonadota;c__Gemmatimonadetes;o__Longimicrobiales;f__UBA6960;g__;s__	N/A	N/A	N/A	N/A	N/A	N/A	N/A	N/A	N/A	N/A	d__Bacteria;p__Gemmatimonadota;c__Gemmatimonadetes;o__Longimicrobiales;f__UBA6960;g__;s__	taxonomic novelty determined using RED	N/A	N/A	90.25
	M3-2_Bin_246	Group2	N	Yes	Gemmatimonadetes	d__Bacteria;p__Gemmatimonadota;c__Gemmatimonadetes;o__Gemmatimonadales;f__GWC2-71-9;g__WVYX01;s__	N	2.87453	4.12533	500	38492	6913	65.61	2964	2874531	2000	5749.1	Bohai Sea M3, China	Coastal Sediment	38.6675N/119.5475E	k__Bacteria (UID2495)	2993	147	91	33	111	3	0	0	0	69.68	2.3	0	d__Bacteria;p__Gemmatimonadota;c__Gemmatimonadetes;o__Gemmatimonadales;f__GWC2-71-9;g__WVYX01;s__	N/A	N/A	N/A	N/A	N/A	GCA_011772755.1	95	d__Bacteria;p__Gemmatimonadota;c__Gemmatimonadetes;o__Gemmatimonadales;f__GWC2-71-9;g__WVYX01;s__WVYX01 sp011772755	75.73	0.1	d__Bacteria;p__Gemmatimonadota;c__Gemmatimonadetes;o__Gemmatimonadales;f__GWC2-71-9;g__;s__	taxonomic classification defined by topology and ANI	N/A	N/A	60.41
	M3-2_Bin_247	Group4	N	Yes	Gemmatimonadetes	d__Bacteria;p__Gemmatimonadota;c__Gemmatimonadetes;o__Longimicrobiales;f__UBA6960;g__SZUA-318;s__	N	3.31089	5.46352	778	19555	4668	66.85	3474	3310893	2001	4255.6	Bohai Sea M3, China	Coastal Sediment	38.6675N/119.5475E	k__Bacteria (UID2495)	2993	147	91	63	80	4	0	0	0	60.6	4.4	0	d__Bacteria;p__Gemmatimonadota;c__Gemmatimonadetes;o__Longimicrobiales;f__UBA6960;g__SZUA-318;s__	N/A	N/A	N/A	N/A	N/A	GCA_003248075.1	95	d__Bacteria;p__Gemmatimonadota;c__Gemmatimonadetes;o__Longimicrobiales;f__UBA6960;g__SZUA-318;s__SZUA-318 sp003248075	77.02	0.22	d__Bacteria;p__Gemmatimonadota;c__Gemmatimonadetes;o__Longimicrobiales;f__UBA6960;g__;s__	taxonomic classification defined by topology and ANI	N/A	N/A	48.88
	M3-2_Bin_287	Group4	Y	Yes	Gemmatimonadetes	d__Bacteria;p__Gemmatimonadota;c__Gemmatimonadetes;o__Longimicrobiales;f__UBA6960;g__JABDNZ01;s__	N	4.65437	4.98273	817	39792	7040	62.98	4498	4654369	2005	5696.9	Bohai Sea M3, China	Coastal Sediment	38.6675N/119.5475E	k__Bacteria (UID2495)	2993	147	91	6	137	4	0	0	0	93.41	4.4	25	d__Bacteria;p__Gemmatimonadota;c__Gemmatimonadetes;o__Longimicrobiales;f__UBA6960;g__JABDNZ01;s__	N/A	N/A	N/A	N/A	N/A	GCA_013043565.1	95	d__Bacteria;p__Gemmatimonadota;c__Gemmatimonadetes;o__Longimicrobiales;f__UBA6960;g__JABDNZ01;s__JABDNZ01 sp013043565	77.14	0.15	d__Bacteria;p__Gemmatimonadota;c__Gemmatimonadetes;o__Longimicrobiales;f__UBA6960;g__;s__	taxonomic classification defined by topology and ANI	N/A	N/A	77.72
	M3-2_Bin_318	Group3	N	Yes	Gemmatimonadetes	d__Bacteria;p__Gemmatimonadota;c__Gemmatimonadetes;o__KS3-K002;f__JABDQB01;g__;s__	N	2.51779	3.68151	516	25336	5610	64.48	2673	2517786	2004	4879.4	Bohai Sea M3, China	Coastal Sediment	38.6675N/119.5475E	k__Bacteria (UID2495)	2993	147	91	47	87	12	1	0	0	68.39	9.07	46.67	d__Bacteria;p__Gemmatimonadota;c__Gemmatimonadetes;o__KS3-K002;f__JABDQB01;g__;s__	N/A	N/A	N/A	N/A	N/A	GCA_013042495.1	95	d__Bacteria;p__Gemmatimonadota;c__Gemmatimonadetes;o__KS3-K002;f__JABDQB01;g__JABDQB01;s__JABDQB01 sp013042495	76.75	0.1	d__Bacteria;p__Gemmatimonadota;c__Gemmatimonadetes;o__KS3-K002;f__JABDQB01;g__;s__	taxonomic classification defined by topology and ANI	N/A	N/A	51.32
	M3-2_Bin_319	Group3	N	Yes	Gemmatimonadetes	d__Bacteria;p__Gemmatimonadota;c__Gemmatimonadetes;o__KS3-K002;f__JABDQB01;g__;s__	N	3.6104	4.12194	608	39889	7493	65.15	3574	3610403	2000	5938.2	Bohai Sea M3, China	Coastal Sediment	38.6675N/119.5475E	k__Bacteria (UID203)	5449	104	58	8	80	15	1	0	0	87.59	9.17	77.78	d__Bacteria;p__Gemmatimonadota;c__Gemmatimonadetes;o__KS3-K002;f__JABDQB01;g__;s__	N/A	N/A	N/A	N/A	N/A	N/A	N/A	N/A	N/A	N/A	d__Bacteria;p__Gemmatimonadota;c__Gemmatimonadetes;o__KS3-K002;f__JABDQB01;g__;s__	taxonomic novelty determined using RED	N/A	N/A	64.58
	M3-2_Bin_330	Group4	Y	Yes	Gemmatimonadetes	d__Bacteria;p__Gemmatimonadota;c__Gemmatimonadetes;o__Longimicrobiales;f__UBA6960;g__;s__	N	4.228	4.55309	435	56621	13915	68.35	3905	4227996	2016	9719.5	Bohai Sea M3, China	Coastal Sediment	38.6675N/119.5475E	k__Bacteria (UID2495)	2993	147	91	7	136	4	0	0	0	92.86	3.3	25	d__Bacteria;p__Gemmatimonadota;c__Gemmatimonadetes;o__Longimicrobiales;f__UBA6960;g__;s__	N/A	N/A	N/A	N/A	N/A	GCA_002346665.1	95	d__Bacteria;p__Gemmatimonadota;c__Gemmatimonadetes;o__Longimicrobiales;f__UBA6960;g__UBA2988;s__UBA2988 sp002346665	76.18	0.04	d__Bacteria;p__Gemmatimonadota;c__Gemmatimonadetes;o__Longimicrobiales;f__UBA6960;g__;s__	taxonomic classification defined by topology and ANI	N/A	N/A	76.73
	M3-2_Bin_348	Group3	Y	Yes	Gemmatimonadetes	d__Bacteria;p__Gemmatimonadota;c__Gemmatimonadetes;o__KS3-K002;f__JABDQB01;g__;s__	N	3.93973	4.07418	295	122061	23111	65.07	3643	3939730	2038	13355	Bohai Sea M3, China	Coastal Sediment	38.6675N/119.5475E	k__Bacteria (UID2495)	2993	147	91	3	142	2	0	0	0	96.7	2.2	0	d__Bacteria;p__Gemmatimonadota;c__Gemmatimonadetes;o__KS3-K002;f__JABDQB01;g__;s__	N/A	N/A	N/A	N/A	N/A	N/A	N/A	N/A	N/A	N/A	d__Bacteria;p__Gemmatimonadota;c__Gemmatimonadetes;o__KS3-K002;f__JABDQB01;g__;s__	taxonomic novelty determined using RED	N/A	N/A	91.09
	M3-2_Bin_34	Group4	N	Yes	Gemmatimonadetes	d__Bacteria;p__Gemmatimonadota;c__Gemmatimonadetes;o__Longimicrobiales;f__UBA6960;g__UBA2589;s__	N	3.00952	4.93122	640	25447	5282	64.19	3215	3009523	2001	4702.4	Bohai Sea M3, China	Coastal Sediment	38.6675N/119.5475E	k__Bacteria (UID2495)	2993	147	91	45	95	7	0	0	0	61.03	5.59	14.29	d__Bacteria;p__Gemmatimonadota;c__Gemmatimonadetes;o__Longimicrobiales;f__UBA6960;g__UBA2589;s__	N/A	N/A	N/A	N/A	N/A	N/A	N/A	N/A	N/A	N/A	d__Bacteria;p__Gemmatimonadota;c__Gemmatimonadetes;o__Longimicrobiales;f__UBA6960;g__UBA2589;s__	ANI	N/A	GCA_002390225.1, s__UBA2589 sp002390225, 95.0, 77.59, 0.22; GCA_013002885.1, s__UBA2589 sp013002885, 95.0, 76.96, 0.2; GCA_002500925.1, s__UBA2589 sp002500925, 95.0, 76.79, 0.04; GCA_002348465.1, s__UBA2589 sp002348465, 95.0, 76.28, 0.04; GCA_002348265.1, s__UBA2589 sp002348265, 95.0, 75.85, 0.03	53.52
	M3-2_Bin_353	Group2	Y	Yes	Gemmatimonadetes	d__Bacteria;p__Gemmatimonadota;c__Gemmatimonadetes;o__Gemmatimonadales;f__GWC2-71-9;g__WVYX01;s__	N	3.37089	3.56671	166	107139	39636	67.48	3178	3370895	2179	20306.6	Bohai Sea M3, China	Coastal Sediment	38.6675N/119.5475E	k__Bacteria (UID2495)	2993	147	91	7	136	4	0	0	0	94.51	3.85	0	d__Bacteria;p__Gemmatimonadota;c__Gemmatimonadetes;o__Gemmatimonadales;f__GWC2-71-9;g__WVYX01;s__	N/A	N/A	N/A	N/A	N/A	GCA_011772755.1	95	d__Bacteria;p__Gemmatimonadota;c__Gemmatimonadetes;o__Gemmatimonadales;f__GWC2-71-9;g__WVYX01;s__WVYX01 sp011772755	76.95	0.21	d__Bacteria;p__Gemmatimonadota;c__Gemmatimonadetes;o__Gemmatimonadales;f__GWC2-71-9;g__;s__	taxonomic classification defined by topology and ANI	N/A	N/A	88.49
	M3-2_Bin_360	Group4	N	Yes	Gemmatimonadetes	d__Bacteria;p__Gemmatimonadota;c__Gemmatimonadetes;o__Longimicrobiales;f__UBA6960;g__;s__	N	5.96222	6.02853	364	179922	36255	67.56	5187	5962220	2001	16379.7	Bohai Sea M3, China	Coastal Sediment	38.6675N/119.5475E	k__Bacteria (UID2495)	2993	147	91	1	141	5	0	0	0	98.9	5.49	0	d__Bacteria;p__Gemmatimonadota;c__Gemmatimonadetes;o__Longimicrobiales;f__UBA6960;g__;s__	N/A	N/A	N/A	N/A	N/A	N/A	N/A	N/A	N/A	N/A	d__Bacteria;p__Gemmatimonadota;c__Gemmatimonadetes;o__Longimicrobiales;f__UBA6960;g__;s__	taxonomic classification fully defined by topology	N/A	N/A	89.62
	M3-2_Bin_365	Group2	Y	Yes	Gemmatimonadetes	d__Bacteria;p__Gemmatimonadota;c__Gemmatimonadetes;o__Gemmatimonadales;f__GWC2-71-9;g__WVYX01;s__	N	3.19516	3.42314	218	167969	24917	66.18	3087	3195160	2011	14656.7	Bohai Sea M3, China	Coastal Sediment	38.6675N/119.5475E	k__Bacteria (UID2495)	2993	147	91	7	136	4	0	0	0	93.34	3.4	50	d__Bacteria;p__Gemmatimonadota;c__Gemmatimonadetes;o__Gemmatimonadales;f__GWC2-71-9;g__WVYX01;s__	N/A	N/A	N/A	N/A	N/A	GCA_011772755.1	95	d__Bacteria;p__Gemmatimonadota;c__Gemmatimonadetes;o__Gemmatimonadales;f__GWC2-71-9;g__WVYX01;s__WVYX01 sp011772755	76.58	0.16	d__Bacteria;p__Gemmatimonadota;c__Gemmatimonadetes;o__Gemmatimonadales;f__GWC2-71-9;g__;s__	taxonomic classification defined by topology and ANI	N/A	N/A	89.16
	M3-2_Bin_367	Group3	Y	Yes	Gemmatimonadetes	d__Bacteria;p__Gemmatimonadota;c__Gemmatimonadetes;o__KS3-K002;f__JABDQB01;g__JABDQB01;s__	N	2.69958	3.21111	410	25724	7922	66.91	2754	2699576	2024	6584.3	Bohai Sea M3, China	Coastal Sediment	38.6675N/119.5475E	k__Bacteria (UID2495)	2993	147	91	17	127	3	0	0	0	84.07	3.3	0	d__Bacteria;p__Gemmatimonadota;c__Gemmatimonadetes;o__KS3-K002;f__JABDQB01;g__JABDQB01;s__	N/A	N/A	N/A	N/A	N/A	GCA_013042495.1	95	d__Bacteria;p__Gemmatimonadota;c__Gemmatimonadetes;o__KS3-K002;f__JABDQB01;g__JABDQB01;s__JABDQB01 sp013042495	77.66	0.24	d__Bacteria;p__Gemmatimonadota;c__Gemmatimonadetes;o__KS3-K002;f__JABDQB01;g__;s__	taxonomic classification defined by topology and ANI	N/A	N/A	77.19
	M3-2_Bin_396	Group3	Y	Yes	Gemmatimonadetes	d__Bacteria;p__Gemmatimonadota;c__Gemmatimonadetes;o__KS3-K002;f__JABDQB01;g__JABDQB01;s__	N	3.35344	3.42887	127	298900	52912	65.08	3130	3353438	2070	26405	Bohai Sea M3, China	Coastal Sediment	38.6675N/119.5475E	k__Bacteria (UID2495)	2993	147	91	2	142	3	0	0	0	97.8	3.3	0	d__Bacteria;p__Gemmatimonadota;c__Gemmatimonadetes;o__KS3-K002;f__JABDQB01;g__JABDQB01;s__	N/A	N/A	N/A	N/A	N/A	GCA_013042495.1	95	d__Bacteria;p__Gemmatimonadota;c__Gemmatimonadetes;o__KS3-K002;f__JABDQB01;g__JABDQB01;s__JABDQB01 sp013042495	79.72	0.6	d__Bacteria;p__Gemmatimonadota;c__Gemmatimonadetes;o__KS3-K002;f__JABDQB01;g__;s__	taxonomic classification defined by topology and ANI	N/A	N/A	91.8
	M3-2_Bin_407	Group4	N	Yes	Gemmatimonadetes	d__Bacteria;p__Gemmatimonadota;c__Gemmatimonadetes;o__Longimicrobiales;f__UBA6960;g__UBA2589;s__	N	4.86408	5.30897	744	33565	8375	67.35	4801	4864077	2006	6537.7	Bohai Sea M3, China	Coastal Sediment	38.6675N/119.5475E	k__Bacteria (UID2495)	2993	147	91	19	117	11	0	0	0	91.62	8.99	9.09	d__Bacteria;p__Gemmatimonadota;c__Gemmatimonadetes;o__Longimicrobiales;f__UBA6960;g__UBA2589;s__	N/A	N/A	N/A	N/A	N/A	N/A	N/A	N/A	N/A	N/A	d__Bacteria;p__Gemmatimonadota;c__Gemmatimonadetes;o__Longimicrobiales;f__UBA6960;g__UBA2589;s__	ANI	N/A	GCA_013002885.1, s__UBA2589 sp013002885, 95.0, 77.2, 0.19; GCA_002390225.1, s__UBA2589 sp002390225, 95.0, 77.05, 0.21; GCA_002348465.1, s__UBA2589 sp002348465, 95.0, 76.97, 0.05; GCA_002500925.1, s__UBA2589 sp002500925, 95.0, 76.52, 0.05; GCA_002348265.1, s__UBA2589 sp002348265, 95.0, 76.32, 0.04	69.25
	M3-2_Bin_408	Group3	Y	Yes	Gemmatimonadetes	d__Bacteria;p__Gemmatimonadota;c__Gemmatimonadetes;o__KS3-K002;f__JABDQB01;g__JABDQB01;s__	N	3.02266	3.09066	338	94399	13197	65.84	3032	3022662	2012	8942.8	Bohai Sea M3, China	Coastal Sediment	38.6675N/119.5475E	k__Bacteria (UID2495)	2993	147	91	2	140	5	0	0	0	97.8	4.46	20	d__Bacteria;p__Gemmatimonadota;c__Gemmatimonadetes;o__KS3-K002;f__JABDQB01;g__JABDQB01;s__	N/A	N/A	N/A	N/A	N/A	GCA_013042495.1	95	d__Bacteria;p__Gemmatimonadota;c__Gemmatimonadetes;o__KS3-K002;f__JABDQB01;g__JABDQB01;s__JABDQB01 sp013042495	79.66	0.53	d__Bacteria;p__Gemmatimonadota;c__Gemmatimonadetes;o__KS3-K002;f__JABDQB01;g__;s__	taxonomic classification defined by topology and ANI	N/A	N/A	93.19
	M3-2_Bin_426	Group4	Y	Yes	Gemmatimonadetes	d__Bacteria;p__Gemmatimonadota;c__Gemmatimonadetes;o__Longimicrobiales;f__UBA6960;g__;s__	N	3.27306	3.58849	505	35012	8540	66.91	3225	3273065	2001	6481.3	Bohai Sea M3, China	Coastal Sediment	38.6675N/119.5475E	k__Bacteria (UID2495)	2993	147	91	9	135	3	0	0	0	91.21	3.3	0	d__Bacteria;p__Gemmatimonadota;c__Gemmatimonadetes;o__Longimicrobiales;f__UBA6960;g__;s__	N/A	N/A	N/A	N/A	N/A	N/A	N/A	N/A	N/A	N/A	d__Bacteria;p__Gemmatimonadota;c__Gemmatimonadetes;o__Longimicrobiales;f__UBA6960;g__;s__	taxonomic classification fully defined by topology	N/A	N/A	81.7
	M3-2_Bin_50	Group3	N	Yes	Gemmatimonadetes	d__Bacteria;p__Gemmatimonadota;c__Gemmatimonadetes;o__KS3-K002;f__JABDQB01;g__JABDQB01;s__	N	3.03942	4.02412	631	23888	5644	65.17	3274	3039417	2000	4816.8	Bohai Sea M3, China	Coastal Sediment	38.6675N/119.5475E	k__Bacteria (UID2495)	2993	147	91	52	92	2	1	0	0	75.53	4.4	60	d__Bacteria;p__Gemmatimonadota;c__Gemmatimonadetes;o__KS3-K002;f__JABDQB01;g__JABDQB01;s__	N/A	N/A	N/A	N/A	N/A	GCA_013042495.1	95	d__Bacteria;p__Gemmatimonadota;c__Gemmatimonadetes;o__KS3-K002;f__JABDQB01;g__JABDQB01;s__JABDQB01 sp013042495	79.73	0.47	d__Bacteria;p__Gemmatimonadota;c__Gemmatimonadetes;o__KS3-K002;f__JABDQB01;g__;s__	taxonomic classification defined by topology and ANI	N/A	N/A	58.67
	M3-2_Bin_75	Group3	Y	Yes	Gemmatimonadetes	d__Bacteria;p__Gemmatimonadota;c__Gemmatimonadetes;o__KS3-K002;f__;g__;s__	Y	3.32345	3.97399	394	92045	14679	65.26	3387	3323448	2001	8435.1	Bohai Sea M3, China	Coastal Sediment	38.6675N/119.5475E	k__Bacteria (UID2495)	2993	147	91	20	122	5	0	0	0	83.63	3.5	60	d__Bacteria;p__Gemmatimonadota;c__Gemmatimonadetes;o__KS3-K002;f__;g__;s__	N/A	N/A	N/A	N/A	N/A	N/A	N/A	N/A	N/A	N/A	d__Bacteria;p__Gemmatimonadota;c__Gemmatimonadetes;o__KS3-K002;f__;g__;s__	taxonomic novelty determined using RED	N/A	N/A	73.02
	M3-2_Bin_85	Group4	N	Yes	Gemmatimonadetes	d__Bacteria;p__Gemmatimonadota;c__Gemmatimonadetes;o__Longimicrobiales;f__UBA6960;g__;s__	N	3.19882	3.44477	417	51493	11003	66.09	3142	3198817	2014	7671	Bohai Sea M3, China	Coastal Sediment	38.6675N/119.5475E	k__Bacteria (UID2495)	2993	147	91	7	132	8	0	0	0	92.86	8.79	12.5	d__Bacteria;p__Gemmatimonadota;c__Gemmatimonadetes;o__Longimicrobiales;f__UBA6960;g__;s__	N/A	N/A	N/A	N/A	N/A	N/A	N/A	N/A	N/A	N/A	d__Bacteria;p__Gemmatimonadota;c__Gemmatimonadetes;o__Longimicrobiales;f__UBA6960;g__;s__	taxonomic classification fully defined by topology	N/A	N/A	74.59
	M3-30_Bin_108	Group2	Y	Yes	Gemmatimonadetes	d__Bacteria;p__Gemmatimonadota;c__Gemmatimonadetes;o__Gemmatimonadales;f__GWC2-71-9;g__WVYX01;s__	N	5.82977	6.47393	808	110887	11612	59.47	6319	5829772	2001	7215.1	Bohai Sea M3, China	Coastal Sediment	38.6675N/119.5475E	k__Bacteria (UID2495)	2993	147	91	11	131	5	0	0	0	90.05	3.54	0	d__Bacteria;p__Gemmatimonadota;c__Gemmatimonadetes;o__Gemmatimonadales;f__GWC2-71-9;g__WVYX01;s__	N/A	N/A	N/A	N/A	N/A	GCA_011772755.1	95	d__Bacteria;p__Gemmatimonadota;c__Gemmatimonadetes;o__Gemmatimonadales;f__GWC2-71-9;g__WVYX01;s__WVYX01 sp011772755	76.83	0.07	d__Bacteria;p__Gemmatimonadota;c__Gemmatimonadetes;o__Gemmatimonadales;f__GWC2-71-9;g__;s__	taxonomic classification defined by topology and ANI	N/A	N/A	80.84
	M3-30_Bin_124	Group2	N	Yes	Gemmatimonadetes	d__Bacteria;p__Gemmatimonadota;c__Gemmatimonadetes;o__Gemmatimonadales;f__GWC2-71-9;g__WVYX01;s__	N	4.06852	4.54583	874	29488	5459	60.97	4353	4068517	2001	4655.1	Bohai Sea M3, China	Coastal Sediment	38.6675N/119.5475E	k__Bacteria (UID2495)	2993	147	91	12	128	7	0	0	0	89.5	6.69	0	d__Bacteria;p__Gemmatimonadota;c__Gemmatimonadetes;o__Gemmatimonadales;f__GWC2-71-9;g__WVYX01;s__	N/A	N/A	N/A	N/A	N/A	GCA_011772755.1	95	d__Bacteria;p__Gemmatimonadota;c__Gemmatimonadetes;o__Gemmatimonadales;f__GWC2-71-9;g__WVYX01;s__WVYX01 sp011772755	75.57	0.05	d__Bacteria;p__Gemmatimonadota;c__Gemmatimonadetes;o__Gemmatimonadales;f__GWC2-71-9;g__;s__	taxonomic classification defined by topology and ANI	N/A	N/A	79.79
	M3-30_Bin_127	Group2	N	Yes	Gemmatimonadetes	d__Bacteria;p__Gemmatimonadota;c__Gemmatimonadetes;o__Gemmatimonadales;f__GWC2-71-9;g__WVYX01;s__	N	3.41578	4.33144	516	54151	8954	66.96	3555	3415776	2001	6619.7	Bohai Sea M3, China	Coastal Sediment	38.6675N/119.5475E	k__Bacteria (UID2495)	2993	147	91	40	104	3	0	0	0	78.86	3.3	0	d__Bacteria;p__Gemmatimonadota;c__Gemmatimonadetes;o__Gemmatimonadales;f__GWC2-71-9;g__WVYX01;s__	N/A	N/A	N/A	N/A	N/A	GCA_011772755.1	95	d__Bacteria;p__Gemmatimonadota;c__Gemmatimonadetes;o__Gemmatimonadales;f__GWC2-71-9;g__WVYX01;s__WVYX01 sp011772755	76.6	0.17	d__Bacteria;p__Gemmatimonadota;c__Gemmatimonadetes;o__Gemmatimonadales;f__GWC2-71-9;g__;s__	taxonomic classification defined by topology and ANI	N/A	N/A	63.31
	M3-30_Bin_133	Group2	Y	Yes	Gemmatimonadetes	d__Bacteria;p__Gemmatimonadota;c__Gemmatimonadetes;o__Gemmatimonadales;f__GWC2-71-9;g__WVYX01;s__	N	4.07578	4.81656	535	48209	11533	63.46	4257	4075776	2032	7618.3	Bohai Sea M3, China	Coastal Sediment	38.6675N/119.5475E	k__Bacteria (UID2495)	2993	147	91	15	129	3	0	0	0	84.62	3.3	0	d__Bacteria;p__Gemmatimonadota;c__Gemmatimonadetes;o__Gemmatimonadales;f__GWC2-71-9;g__WVYX01;s__	N/A	N/A	N/A	N/A	N/A	GCA_011772755.1	95	d__Bacteria;p__Gemmatimonadota;c__Gemmatimonadetes;o__Gemmatimonadales;f__GWC2-71-9;g__WVYX01;s__WVYX01 sp011772755	76.22	0.06	d__Bacteria;p__Gemmatimonadota;c__Gemmatimonadetes;o__Gemmatimonadales;f__GWC2-71-9;g__;s__	taxonomic classification defined by topology and ANI	N/A	N/A	81.85
	M3-30_Bin_137	Group2	Y	Yes	Gemmatimonadetes	d__Bacteria;p__Gemmatimonadota;c__Gemmatimonadetes;o__Gemmatimonadales;f__GWC2-71-9;g__WVYX01;s__	N	3.35879	4.12628	618	37649	6371	65.71	3532	3358794	2001	5434.9	Bohai Sea M3, China	Coastal Sediment	38.6675N/119.5475E	k__Bacteria (UID2495)	2993	147	91	23	122	2	0	0	0	81.4	2.2	50	d__Bacteria;p__Gemmatimonadota;c__Gemmatimonadetes;o__Gemmatimonadales;f__GWC2-71-9;g__WVYX01;s__	N/A	N/A	N/A	N/A	N/A	GCA_011772755.1	95	d__Bacteria;p__Gemmatimonadota;c__Gemmatimonadetes;o__Gemmatimonadales;f__GWC2-71-9;g__WVYX01;s__WVYX01 sp011772755	76.68	0.13	d__Bacteria;p__Gemmatimonadota;c__Gemmatimonadetes;o__Gemmatimonadales;f__GWC2-71-9;g__;s__	taxonomic classification defined by topology and ANI	N/A	N/A	71.77
	M3-30_Bin_144	Group1	Y	Yes	Gemmatimonadetes	d__Bacteria;p__Gemmatimonadota;c__Gemmatimonadetes;o__JACCXV01;f__;g__;s__	Y	2.69391	2.8917	180	98748	31942	62.07	2803	2693907	2024	14966.2	Bohai Sea M3, China	Coastal Sediment	38.6675N/119.5475E	k__Bacteria (UID2495)	2993	147	91	9	133	5	0	0	0	93.16	4.58	40	d__Bacteria;p__Gemmatimonadota;c__Gemmatimonadetes;o__JACCXV01;f__;g__;s__	N/A	N/A	N/A	N/A	N/A	GCA_013696835.1	95	d__Bacteria;p__Gemmatimonadota;c__Gemmatimonadetes;o__JACCXV01;f__JACCXV01;g__JACCXV01;s__JACCXV01 sp013696835	75.78	0.04	d__Bacteria;p__Gemmatimonadota;c__Gemmatimonadetes;o__;f__;g__;s__	taxonomic classification defined by topology and ANI	N/A	N/A	88.72
	M3-30_Bin_160	Group3	N	Yes	Gemmatimonadetes	d__Bacteria;p__Gemmatimonadota;c__Gemmatimonadetes;o__KS3-K002;f__JABDQB01;g__;s__	N	3.02796	4.10404	630	27098	5409	65.23	3251	3027958	2003	4806.3	Bohai Sea M3, China	Coastal Sediment	38.6675N/119.5475E	k__Bacteria (UID2495)	2993	147	91	41	99	7	0	0	0	73.78	7.69	0	d__Bacteria;p__Gemmatimonadota;c__Gemmatimonadetes;o__KS3-K002;f__JABDQB01;g__;s__	N/A	N/A	N/A	N/A	N/A	N/A	N/A	N/A	N/A	N/A	d__Bacteria;p__Gemmatimonadota;c__Gemmatimonadetes;o__KS3-K002;f__JABDQB01;g__;s__	taxonomic novelty determined using RED	N/A	N/A	57.36
	M3-30_Bin_166	Group3	Y	Yes	Gemmatimonadetes	d__Bacteria;p__Gemmatimonadota;c__Gemmatimonadetes;o__KS3-K002;f__JABDQB01;g__JABDQB01;s__	N	2.8786	3.12349	264	58958	16026	65.78	2884	2878605	2007	10903.8	Bohai Sea M3, China	Coastal Sediment	38.6675N/119.5475E	k__Bacteria (UID2495)	2993	147	91	14	130	3	0	0	0	92.16	3.3	0	d__Bacteria;p__Gemmatimonadota;c__Gemmatimonadetes;o__KS3-K002;f__JABDQB01;g__JABDQB01;s__	N/A	N/A	N/A	N/A	N/A	GCA_013042495.1	95	d__Bacteria;p__Gemmatimonadota;c__Gemmatimonadetes;o__KS3-K002;f__JABDQB01;g__JABDQB01;s__JABDQB01 sp013042495	76.9	0.12	d__Bacteria;p__Gemmatimonadota;c__Gemmatimonadetes;o__KS3-K002;f__JABDQB01;g__;s__	taxonomic classification defined by topology and ANI	N/A	N/A	83.98
	M3-30_Bin_181	Group2	N	Yes	Gemmatimonadetes	d__Bacteria;p__Gemmatimonadota;c__Gemmatimonadetes;o__Gemmatimonadales;f__GWC2-71-9;g__WVYX01;s__	N	2.67417	3.68648	396	29859	9335	67.56	2793	2674170	2011	6753	Bohai Sea M3, China	Coastal Sediment	38.6675N/119.5475E	k__Bacteria (UID2495)	2993	147	91	42	102	3	0	0	0	72.54	3.3	33.33	d__Bacteria;p__Gemmatimonadota;c__Gemmatimonadetes;o__Gemmatimonadales;f__GWC2-71-9;g__WVYX01;s__	N/A	N/A	N/A	N/A	N/A	GCA_011772755.1	95	d__Bacteria;p__Gemmatimonadota;c__Gemmatimonadetes;o__Gemmatimonadales;f__GWC2-71-9;g__WVYX01;s__WVYX01 sp011772755	76.43	0.19	d__Bacteria;p__Gemmatimonadota;c__Gemmatimonadetes;o__Gemmatimonadales;f__GWC2-71-9;g__;s__	taxonomic classification defined by topology and ANI	N/A	N/A	72.94
	M3-30_Bin_182	Group3	Y	Yes	Gemmatimonadetes	d__Bacteria;p__Gemmatimonadota;c__Gemmatimonadetes;o__KS3-K002;f__JABDQB01;g__JABDQB01;s__	N	3.19111	3.30001	233	117716	20831	66.63	3050	3191111	2031	13695.8	Bohai Sea M3, China	Coastal Sediment	38.6675N/119.5475E	k__Bacteria (UID2495)	2993	147	91	3	141	3	0	0	0	96.7	3.3	0	d__Bacteria;p__Gemmatimonadota;c__Gemmatimonadetes;o__KS3-K002;f__JABDQB01;g__JABDQB01;s__	N/A	N/A	N/A	N/A	N/A	GCA_013042495.1	95	d__Bacteria;p__Gemmatimonadota;c__Gemmatimonadetes;o__KS3-K002;f__JABDQB01;g__JABDQB01;s__JABDQB01 sp013042495	77.86	0.28	d__Bacteria;p__Gemmatimonadota;c__Gemmatimonadetes;o__KS3-K002;f__JABDQB01;g__;s__	taxonomic classification defined by topology and ANI	N/A	N/A	91.44
	M3-30_Bin_197	Group2	Y	Yes	Gemmatimonadetes	d__Bacteria;p__Gemmatimonadota;c__Gemmatimonadetes;o__Gemmatimonadales;f__GWC2-71-9;g__WVYX01;s__	N	4.47419	5.39514	939	23998	5446	59.5	4713	4474192	2000	4764.8	Bohai Sea M3, China	Coastal Sediment	38.6675N/119.5475E	k__Bacteria (UID2495)	2993	147	91	23	120	4	0	0	0	82.93	4.4	0	d__Bacteria;p__Gemmatimonadota;c__Gemmatimonadetes;o__Gemmatimonadales;f__GWC2-71-9;g__WVYX01;s__	N/A	N/A	N/A	N/A	N/A	GCA_011772755.1	95	d__Bacteria;p__Gemmatimonadota;c__Gemmatimonadetes;o__Gemmatimonadales;f__GWC2-71-9;g__WVYX01;s__WVYX01 sp011772755	77.4	0.05	d__Bacteria;p__Gemmatimonadota;c__Gemmatimonadetes;o__Gemmatimonadales;f__GWC2-71-9;g__;s__	taxonomic classification defined by topology and ANI	N/A	N/A	72.07
	M3-30_Bin_19	Group2	Y	Yes	Gemmatimonadetes	d__Bacteria;p__Gemmatimonadota;c__Gemmatimonadetes;o__Gemmatimonadales;f__GWC2-71-9;g__WVYX01;s__	N	3.59283	4.30176	532	62869	9579	66.96	3642	3592828	2000	6753.4	Bohai Sea M3, China	Coastal Sediment	38.6675N/119.5475E	k__Bacteria (UID2495)	2993	147	91	18	128	1	0	0	0	83.52	1.1	0	d__Bacteria;p__Gemmatimonadota;c__Gemmatimonadetes;o__Gemmatimonadales;f__GWC2-71-9;g__WVYX01;s__	N/A	N/A	N/A	N/A	N/A	GCA_011772755.1	95	d__Bacteria;p__Gemmatimonadota;c__Gemmatimonadetes;o__Gemmatimonadales;f__GWC2-71-9;g__WVYX01;s__WVYX01 sp011772755	77.08	0.21	d__Bacteria;p__Gemmatimonadota;c__Gemmatimonadetes;o__Gemmatimonadales;f__GWC2-71-9;g__;s__	taxonomic classification defined by topology and ANI	N/A	N/A	76.39
	M3-30_Bin_224	Group3	N	Yes	Gemmatimonadetes	d__Bacteria;p__Gemmatimonadota;c__Gemmatimonadetes;o__KS3-K002;f__JABDQB01;g__;s__	N	2.817	3.73014	623	25976	5149	65.09	2975	2817002	2002	4521.7	Bohai Sea M3, China	Coastal Sediment	38.6675N/119.5475E	k__Bacteria (UID2495)	2993	147	91	27	117	3	0	0	0	75.52	1.3	0	d__Bacteria;p__Gemmatimonadota;c__Gemmatimonadetes;o__KS3-K002;f__JABDQB01;g__;s__	N/A	N/A	N/A	N/A	N/A	N/A	N/A	N/A	N/A	N/A	d__Bacteria;p__Gemmatimonadota;c__Gemmatimonadetes;o__KS3-K002;f__JABDQB01;g__;s__	taxonomic novelty determined using RED	N/A	N/A	73.36
	M3-30_Bin_272	Group4	Y	Yes	Gemmatimonadetes	d__Bacteria;p__Gemmatimonadota;c__Gemmatimonadetes;o__Longimicrobiales;f__UBA6960;g__;s__	N	6.13815	6.86364	689	74628	12786	67.5	5660	6138154	2001	8908.8	Bohai Sea M3, China	Coastal Sediment	38.6675N/119.5475E	k__Bacteria (UID2495)	2993	147	91	12	131	4	0	0	0	89.43	3.85	0	d__Bacteria;p__Gemmatimonadota;c__Gemmatimonadetes;o__Longimicrobiales;f__UBA6960;g__;s__	N/A	N/A	N/A	N/A	N/A	N/A	N/A	N/A	N/A	N/A	d__Bacteria;p__Gemmatimonadota;c__Gemmatimonadetes;o__Longimicrobiales;f__UBA6960;g__;s__	taxonomic classification fully defined by topology	N/A	N/A	76.47
	M3-30_Bin_274	Group3	Y	Yes	Gemmatimonadetes	d__Bacteria;p__Gemmatimonadota;c__Gemmatimonadetes;o__KS3-K002;f__KS3-K002;g__KS3-K002;s__	N	2.90961	3.43844	460	43531	7675	65.3	3036	2909607	2016	6325.2	Bohai Sea M3, China	Coastal Sediment	38.6675N/119.5475E	k__Bacteria (UID2495)	2993	147	91	16	127	4	0	0	0	84.62	2.81	25	d__Bacteria;p__Gemmatimonadota;c__Gemmatimonadetes;o__KS3-K002;f__KS3-K002;g__KS3-K002;s__	N/A	N/A	N/A	N/A	N/A	GCA_011774835.1	95	d__Bacteria;p__Gemmatimonadota;c__Gemmatimonadetes;o__KS3-K002;f__KS3-K002;g__KS3-K002;s__KS3-K002 sp011774835	78.06	0.29	d__Bacteria;p__Gemmatimonadota;c__Gemmatimonadetes;o__KS3-K002;f__;g__;s__	taxonomic classification defined by topology and ANI	N/A	N/A	78.26
	M3-30_Bin_280	Group2	Y	Yes	Gemmatimonadetes	d__Bacteria;p__Gemmatimonadota;c__Gemmatimonadetes;o__Gemmatimonadales;f__GWC2-71-9;g__WVYX01;s__	N	4.55684	4.60753	182	283256	55141	66.24	4135	4556844	2125	25037.6	Bohai Sea M3, China	Coastal Sediment	38.6675N/119.5475E	k__Bacteria (UID2495)	2993	147	91	1	144	2	0	0	0	98.9	2.2	0	d__Bacteria;p__Gemmatimonadota;c__Gemmatimonadetes;o__Gemmatimonadales;f__GWC2-71-9;g__WVYX01;s__	N/A	N/A	N/A	N/A	N/A	GCA_011772755.1	95	d__Bacteria;p__Gemmatimonadota;c__Gemmatimonadetes;o__Gemmatimonadales;f__GWC2-71-9;g__WVYX01;s__WVYX01 sp011772755	76.68	0.13	d__Bacteria;p__Gemmatimonadota;c__Gemmatimonadetes;o__Gemmatimonadales;f__GWC2-71-9;g__;s__	taxonomic classification defined by topology and ANI	N/A	N/A	93.51
	M3-30_Bin_329	Group2	N	Yes	Gemmatimonadetes	d__Bacteria;p__Gemmatimonadota;c__Gemmatimonadetes;o__Gemmatimonadales;f__GWC2-71-9;g__JABDII01;s__	N	2.51393	3.40134	581	28052	4752	63.77	2905	2513931	2001	4326.9	Bohai Sea M3, China	Coastal Sediment	38.6675N/119.5475E	k__Bacteria (UID2495)	2993	147	91	31	113	3	0	0	0	73.91	3.3	33.33	d__Bacteria;p__Gemmatimonadota;c__Gemmatimonadetes;o__Gemmatimonadales;f__GWC2-71-9;g__JABDII01;s__	N/A	N/A	N/A	N/A	N/A	GCA_013003805.1	95	d__Bacteria;p__Gemmatimonadota;c__Gemmatimonadetes;o__Gemmatimonadales;f__GWC2-71-9;g__JABDII01;s__JABDII01 sp013003805	84.69	0.61	d__Bacteria;p__Gemmatimonadota;c__Gemmatimonadetes;o__Gemmatimonadales;f__GWC2-71-9;g__;s__	taxonomic classification defined by topology and ANI	N/A	N/A	68.39
	M3-30_Bin_330	Group3	Y	Yes	Gemmatimonadetes	d__Bacteria;p__Gemmatimonadota;c__Gemmatimonadetes;o__KS3-K002;f__JABDQB01;g__;s__	N	3.51235	4.35938	289	96213	18072	66.04	3534	3512354	2100	12153.5	Bohai Sea M3, China	Coastal Sediment	38.6675N/119.5475E	k__Bacteria (UID2495)	2993	147	91	28	111	8	0	0	0	80.57	2.8	12.5	d__Bacteria;p__Gemmatimonadota;c__Gemmatimonadetes;o__KS3-K002;f__JABDQB01;g__;s__	N/A	N/A	N/A	N/A	N/A	GCA_013042495.1	95	d__Bacteria;p__Gemmatimonadota;c__Gemmatimonadetes;o__KS3-K002;f__JABDQB01;g__JABDQB01;s__JABDQB01 sp013042495	76.2	0.08	d__Bacteria;p__Gemmatimonadota;c__Gemmatimonadetes;o__KS3-K002;f__JABDQB01;g__;s__	taxonomic classification defined by topology and ANI	N/A	N/A	68.41
	M3-30_Bin_363	Group3	Y	Yes	Gemmatimonadetes	d__Bacteria;p__Gemmatimonadota;c__Gemmatimonadetes;o__KS3-K002;f__JABDQB01;g__JABDQB01;s__	N	3.11016	3.29083	140	82080	32703	66.09	2964	3110160	2514	22215.4	Bohai Sea M3, China	Coastal Sediment	38.6675N/119.5475E	k__Bacteria (UID2495)	2993	147	91	6	139	2	0	0	0	94.51	2.2	0	d__Bacteria;p__Gemmatimonadota;c__Gemmatimonadetes;o__KS3-K002;f__JABDQB01;g__JABDQB01;s__	N/A	N/A	N/A	N/A	N/A	GCA_013042495.1	95	d__Bacteria;p__Gemmatimonadota;c__Gemmatimonadetes;o__KS3-K002;f__JABDQB01;g__JABDQB01;s__JABDQB01 sp013042495	77.16	0.19	d__Bacteria;p__Gemmatimonadota;c__Gemmatimonadetes;o__KS3-K002;f__JABDQB01;g__;s__	taxonomic classification defined by topology and ANI	N/A	N/A	86.66
	M3-30_Bin_36	Group2	Y	Yes	Gemmatimonadetes	d__Bacteria;p__Gemmatimonadota;c__Gemmatimonadetes;o__Gemmatimonadales;f__GWC2-71-9;g__WVYX01;s__	N	4.47856	5.40889	830	37177	6379	57.55	4608	4478564	2000	5395.9	Bohai Sea M3, China	Coastal Sediment	38.6675N/119.5475E	k__Bacteria (UID2495)	2993	147	91	21	119	7	0	0	0	82.8	4.96	28.57	d__Bacteria;p__Gemmatimonadota;c__Gemmatimonadetes;o__Gemmatimonadales;f__GWC2-71-9;g__WVYX01;s__	N/A	N/A	N/A	N/A	N/A	GCA_011772755.1	95	d__Bacteria;p__Gemmatimonadota;c__Gemmatimonadetes;o__Gemmatimonadales;f__GWC2-71-9;g__WVYX01;s__WVYX01 sp011772755	75.58	0.02	d__Bacteria;p__Gemmatimonadota;c__Gemmatimonadetes;o__Gemmatimonadales;f__GWC2-71-9;g__;s__	taxonomic classification defined by topology and ANI	N/A	N/A	75.48
	M3-30_Bin_384	Group3	Y	Yes	Gemmatimonadetes	d__Bacteria;p__Gemmatimonadota;c__Gemmatimonadetes;o__KS3-K002;f__KS3-K002;g__KS3-K002;s__	N	5.15934	5.73196	648	54649	10649	63.23	4919	5159337	2004	7961.9	Bohai Sea M3, China	Coastal Sediment	38.6675N/119.5475E	k__Bacteria (UID2495)	2993	147	91	10	131	6	0	0	0	90.01	4.46	50	d__Bacteria;p__Gemmatimonadota;c__Gemmatimonadetes;o__KS3-K002;f__KS3-K002;g__KS3-K002;s__	N/A	N/A	N/A	N/A	N/A	GCA_011774835.1	95	d__Bacteria;p__Gemmatimonadota;c__Gemmatimonadetes;o__KS3-K002;f__KS3-K002;g__KS3-K002;s__KS3-K002 sp011774835	76.79	0.18	d__Bacteria;p__Gemmatimonadota;c__Gemmatimonadetes;o__KS3-K002;f__;g__;s__	taxonomic classification defined by topology and ANI	N/A	N/A	81.36
	M3-30_Bin_385	Group3	Y	Yes	Gemmatimonadetes	d__Bacteria;p__Gemmatimonadota;c__Gemmatimonadetes;o__KS3-K002;f__KS3-K002;g__KS3-K002;s__	N	3.46719	3.93373	630	26147	6362	64.23	3542	3467188	2026	5503.5	Bohai Sea M3, China	Coastal Sediment	38.6675N/119.5475E	k__Bacteria (UID2495)	2993	147	91	18	124	5	0	0	0	88.14	4.95	0	d__Bacteria;p__Gemmatimonadota;c__Gemmatimonadetes;o__KS3-K002;f__KS3-K002;g__KS3-K002;s__	N/A	N/A	N/A	N/A	N/A	GCA_011774835.1	95	d__Bacteria;p__Gemmatimonadota;c__Gemmatimonadetes;o__KS3-K002;f__KS3-K002;g__KS3-K002;s__KS3-K002 sp011774835	77.87	0.25	d__Bacteria;p__Gemmatimonadota;c__Gemmatimonadetes;o__KS3-K002;f__;g__;s__	taxonomic classification defined by topology and ANI	N/A	N/A	74.17
	M3-30_Bin_45	Group3	N	Yes	Gemmatimonadetes	d__Bacteria;p__Gemmatimonadota;c__Gemmatimonadetes;o__KS3-K002;f__KS3-K002;g__KS3-K002;s__	N	5.02671	6.06358	822	49837	7589	62.97	4974	5026710	2000	6115.2	Bohai Sea M3, China	Coastal Sediment	38.6675N/119.5475E	k__Bacteria (UID2495)	2993	147	91	24	117	6	0	0	0	82.9	6.59	50	d__Bacteria;p__Gemmatimonadota;c__Gemmatimonadetes;o__KS3-K002;f__KS3-K002;g__KS3-K002;s__	N/A	N/A	N/A	N/A	N/A	GCA_011774835.1	95	d__Bacteria;p__Gemmatimonadota;c__Gemmatimonadetes;o__KS3-K002;f__KS3-K002;g__KS3-K002;s__KS3-K002 sp011774835	76.61	0.16	d__Bacteria;p__Gemmatimonadota;c__Gemmatimonadetes;o__KS3-K002;f__;g__;s__	taxonomic classification defined by topology and ANI	N/A	N/A	67.72
	M3-30_Bin_75	Group3	N	Yes	Gemmatimonadetes	d__Bacteria;p__Gemmatimonadota;c__Gemmatimonadetes;o__KS3-K002;f__KS3-K002;g__;s__	N	4.45513	5.09974	609	44708	10244	64.23	4377	4455130	2000	7315.5	Bohai Sea M3, China	Coastal Sediment	38.6675N/119.5475E	k__Bacteria (UID2495)	2993	147	91	13	124	10	0	0	0	87.36	9.52	20	d__Bacteria;p__Gemmatimonadota;c__Gemmatimonadetes;o__KS3-K002;f__KS3-K002;g__;s__	N/A	N/A	N/A	N/A	N/A	GCA_011774835.1	95	d__Bacteria;p__Gemmatimonadota;c__Gemmatimonadetes;o__KS3-K002;f__KS3-K002;g__KS3-K002;s__KS3-K002 sp011774835	77.36	0.25	d__Bacteria;p__Gemmatimonadota;c__Gemmatimonadetes;o__KS3-K002;f__;g__;s__	taxonomic classification defined by topology and ANI	N/A	N/A	78.1
	M3-30_Bin_7	Group1	N	Yes	Gemmatimonadetes	d__Bacteria;p__Gemmatimonadota;c__Gemmatimonadetes;o__JACCXV01;f__;g__;s__	N	1.80473	3.5091	288	35230	7911	62.17	2030	1804731	2012	6266.4	Bohai Sea M3, China	Coastal Sediment	38.6675N/119.5475E	k__Bacteria (UID203)	5449	104	58	59	43	2	0	0	0	51.43	2.59	50	d__Bacteria;p__Gemmatimonadota;c__Gemmatimonadetes;o__JACCXV01;f__;g__;s__	N/A	N/A	N/A	N/A	N/A	GCA_013696835.1	95	d__Bacteria;p__Gemmatimonadota;c__Gemmatimonadetes;o__JACCXV01;f__JACCXV01;g__JACCXV01;s__JACCXV01 sp013696835	74.82	0.02	d__Bacteria;p__Gemmatimonadota;c__Gemmatimonadetes;o__;f__;g__;s__	taxonomic classification defined by topology and ANI	N/A	N/A	49.51
	M3-30_Bin_85	Group2	N	Yes	Gemmatimonadetes	d__Bacteria;p__Gemmatimonadota;c__Gemmatimonadetes;o__Gemmatimonadales;f__GWC2-71-9;g__WVYX01;s__	N	3.25357	3.66476	281	100532	20537	67.44	3183	3253571	2001	11578.5	Bohai Sea M3, China	Coastal Sediment	38.6675N/119.5475E	k__Bacteria (UID2495)	2993	147	91	17	122	8	0	0	0	88.78	7.14	37.5	d__Bacteria;p__Gemmatimonadota;c__Gemmatimonadetes;o__Gemmatimonadales;f__GWC2-71-9;g__WVYX01;s__	N/A	N/A	N/A	N/A	N/A	GCA_011772755.1	95	d__Bacteria;p__Gemmatimonadota;c__Gemmatimonadetes;o__Gemmatimonadales;f__GWC2-71-9;g__WVYX01;s__WVYX01 sp011772755	76.95	0.22	d__Bacteria;p__Gemmatimonadota;c__Gemmatimonadetes;o__Gemmatimonadales;f__GWC2-71-9;g__;s__	taxonomic classification defined by topology and ANI	N/A	N/A	79.37
	M3-38_Bin_104	Group2	N	Yes	Gemmatimonadetes	d__Bacteria;p__Gemmatimonadota;c__Gemmatimonadetes;o__Gemmatimonadales;f__GWC2-71-9;g__WVYX01;s__	N	2.85442	3.79023	459	36073	8217	67.38	2994	2854422	2002	6218.8	Bohai Sea M3, China	Coastal Sediment	38.6675N/119.5475E	k__Bacteria (UID2495)	2993	147	91	44	97	6	0	0	0	75.31	6.04	66.67	d__Bacteria;p__Gemmatimonadota;c__Gemmatimonadetes;o__Gemmatimonadales;f__GWC2-71-9;g__WVYX01;s__	N/A	N/A	N/A	N/A	N/A	GCA_011772755.1	95	d__Bacteria;p__Gemmatimonadota;c__Gemmatimonadetes;o__Gemmatimonadales;f__GWC2-71-9;g__WVYX01;s__WVYX01 sp011772755	76.55	0.2	d__Bacteria;p__Gemmatimonadota;c__Gemmatimonadetes;o__Gemmatimonadales;f__GWC2-71-9;g__;s__	taxonomic classification defined by topology and ANI	N/A	N/A	66.65
	M3-38_Bin_111	Group3	Y	Yes	Gemmatimonadetes	d__Bacteria;p__Gemmatimonadota;c__Gemmatimonadetes;o__KS3-K002;f__KS3-K002;g__KS3-K002;s__	N	2.58284	3.20292	459	37612	7174	65.04	2812	2582835	2004	5627.1	Bohai Sea M3, China	Coastal Sediment	38.6675N/119.5475E	k__Bacteria (UID2495)	2993	147	91	22	120	5	0	0	0	80.64	2.5	0	d__Bacteria;p__Gemmatimonadota;c__Gemmatimonadetes;o__KS3-K002;f__KS3-K002;g__KS3-K002;s__	N/A	N/A	N/A	N/A	N/A	GCA_011774835.1	95	d__Bacteria;p__Gemmatimonadota;c__Gemmatimonadetes;o__KS3-K002;f__KS3-K002;g__KS3-K002;s__KS3-K002 sp011774835	77.9	0.3	d__Bacteria;p__Gemmatimonadota;c__Gemmatimonadetes;o__KS3-K002;f__;g__;s__	taxonomic classification defined by topology and ANI	N/A	N/A	68.02
	M3-38_Bin_115	Group1	N	Yes	Gemmatimonadetes	d__Bacteria;p__Gemmatimonadota;c__Gemmatimonadetes;o__JACCXV01;f__;g__;s__	N	2.1274	2.76789	302	28557	9351	62.04	2342	2127399	2002	7044.4	Bohai Sea M3, China	Coastal Sediment	38.6675N/119.5475E	k__Bacteria (UID2495)	2993	147	91	27	116	4	0	0	0	76.86	2.48	0	d__Bacteria;p__Gemmatimonadota;c__Gemmatimonadetes;o__JACCXV01;f__;g__;s__	N/A	N/A	N/A	N/A	N/A	GCA_013696835.1	95	d__Bacteria;p__Gemmatimonadota;c__Gemmatimonadetes;o__JACCXV01;f__JACCXV01;g__JACCXV01;s__JACCXV01 sp013696835	74.99	0.03	d__Bacteria;p__Gemmatimonadota;c__Gemmatimonadetes;o__;f__;g__;s__	taxonomic classification defined by topology and ANI	N/A	N/A	76.87
	M3-38_Bin_121	Group2	N	Yes	Gemmatimonadetes	d__Bacteria;p__Gemmatimonadota;c__Gemmatimonadetes;o__Gemmatimonadales;f__GWC2-71-9;g__WVYX01;s__	N	3.43975	4.82637	560	39576	7765	66.09	3525	3439754	2005	6142.4	Bohai Sea M3, China	Coastal Sediment	38.6675N/119.5475E	k__Bacteria (UID2495)	2993	147	91	48	99	0	0	0	0	71.27	0	0	d__Bacteria;p__Gemmatimonadota;c__Gemmatimonadetes;o__Gemmatimonadales;f__GWC2-71-9;g__WVYX01;s__	N/A	N/A	N/A	N/A	N/A	GCA_011772755.1	95	d__Bacteria;p__Gemmatimonadota;c__Gemmatimonadetes;o__Gemmatimonadales;f__GWC2-71-9;g__WVYX01;s__WVYX01 sp011772755	76.31	0.17	d__Bacteria;p__Gemmatimonadota;c__Gemmatimonadetes;o__Gemmatimonadales;f__GWC2-71-9;g__;s__	taxonomic classification defined by topology and ANI	N/A	N/A	59.28
	M3-38_Bin_123	Group3	Y	Yes	Gemmatimonadetes	d__Bacteria;p__Gemmatimonadota;c__Gemmatimonadetes;o__KS3-K002;f__JABDQB01;g__;s__	N	3.51992	4.06083	347	84159	15379	66.18	3528	3519924	2000	10143.9	Bohai Sea M3, China	Coastal Sediment	38.6675N/119.5475E	k__Bacteria (UID2495)	2993	147	91	15	128	4	0	0	0	86.68	3.4	50	d__Bacteria;p__Gemmatimonadota;c__Gemmatimonadetes;o__KS3-K002;f__JABDQB01;g__;s__	N/A	N/A	N/A	N/A	N/A	N/A	N/A	N/A	N/A	N/A	d__Bacteria;p__Gemmatimonadota;c__Gemmatimonadetes;o__KS3-K002;f__JABDQB01;g__;s__	taxonomic novelty determined using RED	N/A	N/A	76.39
	M3-38_Bin_128	Group2	Y	Yes	Gemmatimonadetes	d__Bacteria;p__Gemmatimonadota;c__Gemmatimonadetes;o__Gemmatimonadales;f__GWC2-71-9;g__WVYX01;s__	Y	3.97358	4.31395	525	49200	11658	63.58	4043	3973576	2006	7568.7	Bohai Sea M3, China	Coastal Sediment	38.6675N/119.5475E	k__Bacteria (UID2495)	2993	147	91	9	133	5	0	0	0	92.11	4.95	20	d__Bacteria;p__Gemmatimonadota;c__Gemmatimonadetes;o__Gemmatimonadales;f__GWC2-71-9;g__WVYX01;s__	N/A	N/A	N/A	N/A	N/A	GCA_011772755.1	95	d__Bacteria;p__Gemmatimonadota;c__Gemmatimonadetes;o__Gemmatimonadales;f__GWC2-71-9;g__WVYX01;s__WVYX01 sp011772755	76.31	0.06	d__Bacteria;p__Gemmatimonadota;c__Gemmatimonadetes;o__Gemmatimonadales;f__GWC2-71-9;g__;s__	taxonomic classification defined by topology and ANI	N/A	N/A	87.35
	M3-38_Bin_132	Group3	Y	Yes	Gemmatimonadetes	d__Bacteria;p__Gemmatimonadota;c__Gemmatimonadetes;o__KS3-K002;f__JABDQB01;g__;s__	Y	5.39151	5.71497	715	87227	13025	65.04	5474	5391505	2000	7540.6	Bohai Sea M3, China	Coastal Sediment	38.6675N/119.5475E	k__Bacteria (UID2495)	2993	147	91	7	136	4	0	0	0	94.34	4.4	0	d__Bacteria;p__Gemmatimonadota;c__Gemmatimonadetes;o__KS3-K002;f__JABDQB01;g__;s__	N/A	N/A	N/A	N/A	N/A	N/A	N/A	N/A	N/A	N/A	d__Bacteria;p__Gemmatimonadota;c__Gemmatimonadetes;o__KS3-K002;f__JABDQB01;g__;s__	taxonomic novelty determined using RED	N/A	N/A	85.82
	M3-38_Bin_137	Group2	N	Yes	Gemmatimonadetes	d__Bacteria;p__Gemmatimonadota;c__Gemmatimonadetes;o__Gemmatimonadales;f__GWC2-71-9;g__WVYX01;s__	N	5.26249	5.50469	416	186057	44551	64.23	5118	5262487	2011	12650.2	Bohai Sea M3, China	Coastal Sediment	38.6675N/119.5475E	k__Bacteria (UID2495)	2993	147	91	4	128	15	0	0	0	95.6	9.28	6.67	d__Bacteria;p__Gemmatimonadota;c__Gemmatimonadetes;o__Gemmatimonadales;f__GWC2-71-9;g__WVYX01;s__	N/A	N/A	N/A	N/A	N/A	GCA_011772755.1	95	d__Bacteria;p__Gemmatimonadota;c__Gemmatimonadetes;o__Gemmatimonadales;f__GWC2-71-9;g__WVYX01;s__WVYX01 sp011772755	76.9	0.12	d__Bacteria;p__Gemmatimonadota;c__Gemmatimonadetes;o__Gemmatimonadales;f__GWC2-71-9;g__;s__	taxonomic classification defined by topology and ANI	N/A	N/A	85.09
	M3-38_Bin_140	Group2	Y	Yes	Gemmatimonadetes	d__Bacteria;p__Gemmatimonadota;c__Gemmatimonadetes;o__Gemmatimonadales;f__GWC2-71-9;g__WVYX01;s__	N	4.14261	4.28398	168	206774	89320	65.41	3912	4142609	2002	24658.4	Bohai Sea M3, China	Coastal Sediment	38.6675N/119.5475E	k__Bacteria (UID2495)	2993	147	91	3	141	3	0	0	0	96.7	3.3	33.33	d__Bacteria;p__Gemmatimonadota;c__Gemmatimonadetes;o__Gemmatimonadales;f__GWC2-71-9;g__WVYX01;s__	N/A	N/A	N/A	N/A	N/A	GCA_011772755.1	95	d__Bacteria;p__Gemmatimonadota;c__Gemmatimonadetes;o__Gemmatimonadales;f__GWC2-71-9;g__WVYX01;s__WVYX01 sp011772755	76.51	0.13	d__Bacteria;p__Gemmatimonadota;c__Gemmatimonadetes;o__Gemmatimonadales;f__GWC2-71-9;g__;s__	taxonomic classification defined by topology and ANI	N/A	N/A	92.2
	M3-38_Bin_144	Group1	Y	Yes	Gemmatimonadetes	d__Bacteria;p__Gemmatimonadota;c__Gemmatimonadetes;o__JACCXV01;f__;g__;s__	N	2.77122	2.89876	159	103902	35950	61.98	2820	2771217	2007	17429	Bohai Sea M3, China	Coastal Sediment	38.6675N/119.5475E	k__Bacteria (UID2495)	2993	147	91	5	139	3	0	0	0	95.6	2.38	0	d__Bacteria;p__Gemmatimonadota;c__Gemmatimonadetes;o__JACCXV01;f__;g__;s__	N/A	N/A	N/A	N/A	N/A	GCA_013696835.1	95	d__Bacteria;p__Gemmatimonadota;c__Gemmatimonadetes;o__JACCXV01;f__JACCXV01;g__JACCXV01;s__JACCXV01 sp013696835	75.44	0.04	d__Bacteria;p__Gemmatimonadota;c__Gemmatimonadetes;o__;f__;g__;s__	taxonomic classification defined by topology and ANI	N/A	N/A	93.39
	M3-38_Bin_14	Group2	Y	Yes	Gemmatimonadetes	d__Bacteria;p__Gemmatimonadota;c__Gemmatimonadetes;o__Gemmatimonadales;f__GWC2-71-9;g__WVYX01;s__	N	4.81191	5.90418	841	27985	7039	57.64	4908	4811910	2002	5721.7	Bohai Sea M3, China	Coastal Sediment	38.6675N/119.5475E	k__Bacteria (UID2495)	2993	147	91	22	119	6	0	0	0	81.5	4.05	16.67	d__Bacteria;p__Gemmatimonadota;c__Gemmatimonadetes;o__Gemmatimonadales;f__GWC2-71-9;g__WVYX01;s__	N/A	N/A	N/A	N/A	N/A	GCA_011772755.1	95	d__Bacteria;p__Gemmatimonadota;c__Gemmatimonadetes;o__Gemmatimonadales;f__GWC2-71-9;g__WVYX01;s__WVYX01 sp011772755	75.82	0.02	d__Bacteria;p__Gemmatimonadota;c__Gemmatimonadetes;o__Gemmatimonadales;f__GWC2-71-9;g__;s__	taxonomic classification defined by topology and ANI	N/A	N/A	75.92
	M3-38_Bin_161	Group2	N	Yes	Gemmatimonadetes	d__Bacteria;p__Gemmatimonadota;c__Gemmatimonadetes;o__Gemmatimonadales;f__GWC2-71-9;g__WVYX01;s__	N	8.82616	9.74297	1538	80611	7578	58.72	9167	8826156	2001	5738.7	Bohai Sea M3, China	Coastal Sediment	38.6675N/119.5475E	k__Bacteria (UID2495)	2993	147	91	11	131	5	0	0	0	90.59	5.49	20	d__Bacteria;p__Gemmatimonadota;c__Gemmatimonadetes;o__Gemmatimonadales;f__GWC2-71-9;g__WVYX01;s__	N/A	N/A	N/A	N/A	N/A	GCA_011772755.1	95	d__Bacteria;p__Gemmatimonadota;c__Gemmatimonadetes;o__Gemmatimonadales;f__GWC2-71-9;g__WVYX01;s__WVYX01 sp011772755	76.87	0.06	d__Bacteria;p__Gemmatimonadota;c__Gemmatimonadetes;o__Gemmatimonadales;f__GWC2-71-9;g__;s__	taxonomic classification defined by topology and ANI	N/A	N/A	76.49
	M3-38_Bin_200	Group3	Y	Yes	Gemmatimonadetes	d__Bacteria;p__Gemmatimonadota;c__Gemmatimonadetes;o__KS3-K002;f__JABDQB01;g__JABDQB01;s__	N	2.89012	3.35553	475	24135	7301	66.01	3028	2890120	2013	6084.5	Bohai Sea M3, China	Coastal Sediment	38.6675N/119.5475E	k__Bacteria (UID2495)	2993	147	91	15	126	6	0	0	0	86.13	3.01	50	d__Bacteria;p__Gemmatimonadota;c__Gemmatimonadetes;o__KS3-K002;f__JABDQB01;g__JABDQB01;s__	N/A	N/A	N/A	N/A	N/A	GCA_013042495.1	95	d__Bacteria;p__Gemmatimonadota;c__Gemmatimonadetes;o__KS3-K002;f__JABDQB01;g__JABDQB01;s__JABDQB01 sp013042495	77.07	0.15	d__Bacteria;p__Gemmatimonadota;c__Gemmatimonadetes;o__KS3-K002;f__JABDQB01;g__;s__	taxonomic classification defined by topology and ANI	N/A	N/A	73.83
	M3-38_Bin_201	Group2	N	Yes	Gemmatimonadetes	d__Bacteria;p__Gemmatimonadota;c__Gemmatimonadetes;o__Gemmatimonadales;f__GWC2-71-9;g__WVYX01;s__	N	5.47412	7.06247	713	54239	9904	64.06	5394	5474119	2003	7677.6	Bohai Sea M3, China	Coastal Sediment	38.6675N/119.5475E	k__Bacteria (UID2495)	2993	147	91	25	114	8	0	0	0	77.51	6.24	25	d__Bacteria;p__Gemmatimonadota;c__Gemmatimonadetes;o__Gemmatimonadales;f__GWC2-71-9;g__WVYX01;s__	N/A	N/A	N/A	N/A	N/A	GCA_011772755.1	95	d__Bacteria;p__Gemmatimonadota;c__Gemmatimonadetes;o__Gemmatimonadales;f__GWC2-71-9;g__WVYX01;s__WVYX01 sp011772755	76.54	0.08	d__Bacteria;p__Gemmatimonadota;c__Gemmatimonadetes;o__Gemmatimonadales;f__GWC2-71-9;g__;s__	taxonomic classification defined by topology and ANI	N/A	N/A	73.5
	M3-38_Bin_232	Group3	Y	Yes	Gemmatimonadetes	d__Bacteria;p__Gemmatimonadota;c__Gemmatimonadetes;o__KS3-K002;f__KS3-K002;g__;s__	N	3.73476	4.02192	407	99343	14081	63.45	3594	3734756	2015	9176.3	Bohai Sea M3, China	Coastal Sediment	38.6675N/119.5475E	k__Bacteria (UID2495)	2993	147	91	7	135	5	0	0	0	92.86	3.5	20	d__Bacteria;p__Gemmatimonadota;c__Gemmatimonadetes;o__KS3-K002;f__KS3-K002;g__;s__	N/A	N/A	N/A	N/A	N/A	GCA_011774835.1	95	d__Bacteria;p__Gemmatimonadota;c__Gemmatimonadetes;o__KS3-K002;f__KS3-K002;g__KS3-K002;s__KS3-K002 sp011774835	76.97	0.19	d__Bacteria;p__Gemmatimonadota;c__Gemmatimonadetes;o__KS3-K002;f__;g__;s__	taxonomic classification defined by topology and ANI	N/A	N/A	84.87
	M3-38_Bin_234	Group2	Y	Yes	Gemmatimonadetes	d__Bacteria;p__Gemmatimonadota;c__Gemmatimonadetes;o__Gemmatimonadales;f__GWC2-71-9;g__WVYX01;s__	N	4.05459	4.82287	521	75275	11009	60.43	4097	4054588	2006	7782.3	Bohai Sea M3, China	Coastal Sediment	38.6675N/119.5475E	k__Bacteria (UID2495)	2993	147	91	17	124	6	0	0	0	84.07	4.52	33.33	d__Bacteria;p__Gemmatimonadota;c__Gemmatimonadetes;o__Gemmatimonadales;f__GWC2-71-9;g__WVYX01;s__	N/A	N/A	N/A	N/A	N/A	GCA_011772755.1	95	d__Bacteria;p__Gemmatimonadota;c__Gemmatimonadetes;o__Gemmatimonadales;f__GWC2-71-9;g__WVYX01;s__WVYX01 sp011772755	77.28	0.05	d__Bacteria;p__Gemmatimonadota;c__Gemmatimonadetes;o__Gemmatimonadales;f__GWC2-71-9;g__;s__	taxonomic classification defined by topology and ANI	N/A	N/A	78.74
	M3-38_Bin_238	Group3	Y	Yes	Gemmatimonadetes	d__Bacteria;p__Gemmatimonadota;c__Gemmatimonadetes;o__KS3-K002;f__JABDQB01;g__;s__	N	4.03077	4.34304	355	63468	18097	66.49	3773	4030773	2101	11354.3	Bohai Sea M3, China	Coastal Sediment	38.6675N/119.5475E	k__Bacteria (UID2495)	2993	147	91	17	126	4	0	0	0	92.81	3.66	50	d__Bacteria;p__Gemmatimonadota;c__Gemmatimonadetes;o__KS3-K002;f__JABDQB01;g__;s__	N/A	N/A	N/A	N/A	N/A	N/A	N/A	N/A	N/A	N/A	d__Bacteria;p__Gemmatimonadota;c__Gemmatimonadetes;o__KS3-K002;f__JABDQB01;g__;s__	taxonomic novelty determined using RED	N/A	N/A	82.97
	M3-38_Bin_253	Group2	Y	Yes	Gemmatimonadetes	d__Bacteria;p__Gemmatimonadota;c__Gemmatimonadetes;o__Gemmatimonadales;f__GWC2-71-9;g__WVYX01;s__	N	4.52111	4.5714	238	301884	43780	66.27	4163	4521112	2011	18996.3	Bohai Sea M3, China	Coastal Sediment	38.6675N/119.5475E	k__Bacteria (UID2495)	2993	147	91	1	144	2	0	0	0	98.9	2.2	0	d__Bacteria;p__Gemmatimonadota;c__Gemmatimonadetes;o__Gemmatimonadales;f__GWC2-71-9;g__WVYX01;s__	N/A	N/A	N/A	N/A	N/A	GCA_011772755.1	95	d__Bacteria;p__Gemmatimonadota;c__Gemmatimonadetes;o__Gemmatimonadales;f__GWC2-71-9;g__WVYX01;s__WVYX01 sp011772755	76.71	0.13	d__Bacteria;p__Gemmatimonadota;c__Gemmatimonadetes;o__Gemmatimonadales;f__GWC2-71-9;g__;s__	taxonomic classification defined by topology and ANI	N/A	N/A	92.65
	M3-38_Bin_269	Group3	Y	Yes	Gemmatimonadetes	d__Bacteria;p__Gemmatimonadota;c__Gemmatimonadetes;o__KS3-K002;f__JABDQB01;g__;s__	N	3.23294	3.50226	323	78301	13564	64.89	3183	3232938	2007	10009.1	Bohai Sea M3, China	Coastal Sediment	38.6675N/119.5475E	k__Bacteria (UID2495)	2993	147	91	9	134	4	0	0	0	92.31	3.85	25	d__Bacteria;p__Gemmatimonadota;c__Gemmatimonadetes;o__KS3-K002;f__JABDQB01;g__;s__	N/A	N/A	N/A	N/A	N/A	N/A	N/A	N/A	N/A	N/A	d__Bacteria;p__Gemmatimonadota;c__Gemmatimonadetes;o__KS3-K002;f__JABDQB01;g__;s__	taxonomic novelty determined using RED	N/A	N/A	80.72
	M3-38_Bin_27	Group2	N	Yes	Gemmatimonadetes	d__Bacteria;p__Gemmatimonadota;c__Gemmatimonadetes;o__Gemmatimonadales;f__GWC2-71-9;g__JABDII01;s__	N	4.7577	7.1191	1078	27216	4766	63.19	5418	4757696	2000	4413.4	Bohai Sea M3, China	Coastal Sediment	38.6675N/119.5475E	k__Bacteria (UID2495)	2993	147	91	37	107	3	0	0	0	66.83	3.3	0	d__Bacteria;p__Gemmatimonadota;c__Gemmatimonadetes;o__Gemmatimonadales;f__GWC2-71-9;g__JABDII01;s__	N/A	N/A	N/A	N/A	N/A	GCA_013003805.1	95	d__Bacteria;p__Gemmatimonadota;c__Gemmatimonadetes;o__Gemmatimonadales;f__GWC2-71-9;g__JABDII01;s__JABDII01 sp013003805	84.75	0.41	d__Bacteria;p__Gemmatimonadota;c__Gemmatimonadetes;o__Gemmatimonadales;f__GWC2-71-9;g__;s__	taxonomic classification defined by topology and ANI	N/A	N/A	56.14
	M3-38_Bin_295	Group3	Y	Yes	Gemmatimonadetes	d__Bacteria;p__Gemmatimonadota;c__Gemmatimonadetes;o__KS3-K002;f__JABDQB01;g__JABDQB01;s__	Y	2.96211	3.06319	89	422923	64862	65.67	2822	2962108	2117	33282.1	Bohai Sea M3, China	Coastal Sediment	38.6675N/119.5475E	k__Bacteria (UID2495)	2993	147	91	3	141	3	0	0	0	96.7	3.3	0	d__Bacteria;p__Gemmatimonadota;c__Gemmatimonadetes;o__KS3-K002;f__JABDQB01;g__JABDQB01;s__	N/A	N/A	N/A	N/A	N/A	GCA_013042495.1	95	d__Bacteria;p__Gemmatimonadota;c__Gemmatimonadetes;o__KS3-K002;f__JABDQB01;g__JABDQB01;s__JABDQB01 sp013042495	77.09	0.13	d__Bacteria;p__Gemmatimonadota;c__Gemmatimonadetes;o__KS3-K002;f__JABDQB01;g__;s__	taxonomic classification defined by topology and ANI	N/A	N/A	89.87
	M3-38_Bin_325	Group2	N	Yes	Gemmatimonadetes	d__Bacteria;p__Gemmatimonadota;c__Gemmatimonadetes;o__Gemmatimonadales;f__GWC2-71-9;g__WVYX01;s__	N	2.3148	2.988	320	60783	10137	67.93	2438	2314801	2003	7233.8	Bohai Sea M3, China	Coastal Sediment	38.6675N/119.5475E	k__Bacteria (UID2495)	2993	147	91	27	118	2	0	0	0	77.47	2.2	50	d__Bacteria;p__Gemmatimonadota;c__Gemmatimonadetes;o__Gemmatimonadales;f__GWC2-71-9;g__WVYX01;s__	N/A	N/A	N/A	N/A	N/A	GCA_011772755.1	95	d__Bacteria;p__Gemmatimonadota;c__Gemmatimonadetes;o__Gemmatimonadales;f__GWC2-71-9;g__WVYX01;s__WVYX01 sp011772755	77.05	0.27	d__Bacteria;p__Gemmatimonadota;c__Gemmatimonadetes;o__Gemmatimonadales;f__GWC2-71-9;g__;s__	taxonomic classification defined by topology and ANI	N/A	N/A	73.73
	M3-38_Bin_355	Group3	N	Yes	Gemmatimonadetes	d__Bacteria;p__Gemmatimonadota;c__Gemmatimonadetes;o__KS3-K002;f__KS3-K002;g__KS3-K002;s__	N	5.21325	5.64755	605	51094	11136	63.27	4986	5213253	2032	8616.9	Bohai Sea M3, China	Coastal Sediment	38.6675N/119.5475E	k__Bacteria (UID2495)	2993	147	91	7	134	6	0	0	0	92.31	6.59	50	d__Bacteria;p__Gemmatimonadota;c__Gemmatimonadetes;o__KS3-K002;f__KS3-K002;g__KS3-K002;s__	N/A	N/A	N/A	N/A	N/A	GCA_011774835.1	95	d__Bacteria;p__Gemmatimonadota;c__Gemmatimonadetes;o__KS3-K002;f__KS3-K002;g__KS3-K002;s__KS3-K002 sp011774835	76.77	0.18	d__Bacteria;p__Gemmatimonadota;c__Gemmatimonadetes;o__KS3-K002;f__;g__;s__	taxonomic classification defined by topology and ANI	N/A	N/A	79.47
	M3-38_Bin_383	Group2	N	Yes	Gemmatimonadetes	d__Bacteria;p__Gemmatimonadota;c__Gemmatimonadetes;o__Gemmatimonadales;f__GWC2-71-9;g__WVYX01;s__	N	6.4925	12.8133	1608	47460	4260	59.84	7380	6492503	2001	4037.6	Bohai Sea M3, China	Coastal Sediment	38.6675N/119.5475E	k__Bacteria (UID2495)	2993	147	91	69	78	0	0	0	0	50.67	0	0	d__Bacteria;p__Gemmatimonadota;c__Gemmatimonadetes;o__Gemmatimonadales;f__GWC2-71-9;g__WVYX01;s__	N/A	N/A	N/A	N/A	N/A	GCA_011772755.1	95	d__Bacteria;p__Gemmatimonadota;c__Gemmatimonadetes;o__Gemmatimonadales;f__GWC2-71-9;g__WVYX01;s__WVYX01 sp011772755	76.43	0.05	d__Bacteria;p__Gemmatimonadota;c__Gemmatimonadetes;o__Gemmatimonadales;f__GWC2-71-9;g__;s__	taxonomic classification defined by topology and ANI	N/A	N/A	47.25
	M3-38_Bin_395	Group2	Y	Yes	Gemmatimonadetes	d__Bacteria;p__Gemmatimonadota;c__Gemmatimonadetes;o__Gemmatimonadales;f__GWC2-71-9;g__WVYX01;s__	N	3.89788	4.69115	769	44545	5798	61.29	4131	3897880	2001	5068.8	Bohai Sea M3, China	Coastal Sediment	38.6675N/119.5475E	k__Bacteria (UID2495)	2993	147	91	21	124	2	0	0	0	83.09	2.2	0	d__Bacteria;p__Gemmatimonadota;c__Gemmatimonadetes;o__Gemmatimonadales;f__GWC2-71-9;g__WVYX01;s__	N/A	N/A	N/A	N/A	N/A	GCA_011772755.1	95	d__Bacteria;p__Gemmatimonadota;c__Gemmatimonadetes;o__Gemmatimonadales;f__GWC2-71-9;g__WVYX01;s__WVYX01 sp011772755	76.5	0.04	d__Bacteria;p__Gemmatimonadota;c__Gemmatimonadetes;o__Gemmatimonadales;f__GWC2-71-9;g__;s__	taxonomic classification defined by topology and ANI	N/A	N/A	76.14
	M3-38_Bin_398	Group3	Y	Yes	Gemmatimonadetes	d__Bacteria;p__Gemmatimonadota;c__Gemmatimonadetes;o__KS3-K002;f__KS3-K002;g__KS3-K002;s__	N	4.32292	4.52472	128	257196	69815	64.46	3850	4322921	2329	33772.8	Bohai Sea M3, China	Coastal Sediment	38.6675N/119.5475E	k__Bacteria (UID2495)	2993	147	91	5	138	4	0	0	0	95.54	4.4	0	d__Bacteria;p__Gemmatimonadota;c__Gemmatimonadetes;o__KS3-K002;f__KS3-K002;g__KS3-K002;s__	N/A	N/A	N/A	N/A	N/A	GCA_011774835.1	95	d__Bacteria;p__Gemmatimonadota;c__Gemmatimonadetes;o__KS3-K002;f__KS3-K002;g__KS3-K002;s__KS3-K002 sp011774835	77.53	0.29	d__Bacteria;p__Gemmatimonadota;c__Gemmatimonadetes;o__KS3-K002;f__;g__;s__	taxonomic classification defined by topology and ANI	N/A	N/A	88.51
	M3-38_Bin_401	Group3	N	Yes	Gemmatimonadetes	d__Bacteria;p__Gemmatimonadota;c__Gemmatimonadetes;o__KS3-K002;f__KS3-K002;g__;s__	N	5.81714	6.4556	414	116294	22340	63.04	5276	5817143	2091	14051.1	Bohai Sea M3, China	Coastal Sediment	38.6675N/119.5475E	k__Bacteria (UID2495)	2993	147	91	9	125	13	0	0	0	90.11	6.69	15.38	d__Bacteria;p__Gemmatimonadota;c__Gemmatimonadetes;o__KS3-K002;f__KS3-K002;g__;s__	N/A	N/A	N/A	N/A	N/A	GCA_011774835.1	95	d__Bacteria;p__Gemmatimonadota;c__Gemmatimonadetes;o__KS3-K002;f__KS3-K002;g__KS3-K002;s__KS3-K002 sp011774835	76.89	0.19	d__Bacteria;p__Gemmatimonadota;c__Gemmatimonadetes;o__KS3-K002;f__;g__;s__	taxonomic classification defined by topology and ANI	N/A	N/A	78.86
	M3-38_Bin_419	Group4	N	Yes	Gemmatimonadetes	d__Bacteria;p__Gemmatimonadota;c__Gemmatimonadetes;o__Longimicrobiales;f__UBA6960;g__;s__	N	5.10005	6.61743	1014	22234	5866	67.7	5086	5100050	2000	5029.6	Bohai Sea M3, China	Coastal Sediment	38.6675N/119.5475E	k__Bacteria (UID2495)	2993	147	91	32	113	2	0	0	0	77.07	2.2	0	d__Bacteria;p__Gemmatimonadota;c__Gemmatimonadetes;o__Longimicrobiales;f__UBA6960;g__;s__	N/A	N/A	N/A	N/A	N/A	N/A	N/A	N/A	N/A	N/A	d__Bacteria;p__Gemmatimonadota;c__Gemmatimonadetes;o__Longimicrobiales;f__UBA6960;g__;s__	taxonomic classification fully defined by topology	N/A	N/A	71.05
	M3-38_Bin_427	Group2	N	Yes	Gemmatimonadetes	d__Bacteria;p__Gemmatimonadota;c__Gemmatimonadetes;o__Gemmatimonadales;f__GWC2-71-9;g__WVYX01;s__	N	4.67215	6.46575	1057	29628	4896	61.61	4893	4672153	2000	4420.2	Bohai Sea M3, China	Coastal Sediment	38.6675N/119.5475E	k__Bacteria (UID2495)	2993	147	91	31	107	8	1	0	0	72.26	6.21	18.18	d__Bacteria;p__Gemmatimonadota;c__Gemmatimonadetes;o__Gemmatimonadales;f__GWC2-71-9;g__WVYX01;s__	N/A	N/A	N/A	N/A	N/A	GCA_011772755.1	95	d__Bacteria;p__Gemmatimonadota;c__Gemmatimonadetes;o__Gemmatimonadales;f__GWC2-71-9;g__WVYX01;s__WVYX01 sp011772755	75.97	0.05	d__Bacteria;p__Gemmatimonadota;c__Gemmatimonadetes;o__Gemmatimonadales;f__GWC2-71-9;g__;s__	taxonomic classification defined by topology and ANI	N/A	N/A	63.89
	M3-38_Bin_42	Group2	N	Yes	Gemmatimonadetes	d__Bacteria;p__Gemmatimonadota;c__Gemmatimonadetes;o__Gemmatimonadales;f__GWC2-71-9;g__;s__	N	9.91845	11.9212	1167	48570	10168	63.23	9786	9918451	2004	8499.1	Bohai Sea M3, China	Coastal Sediment	38.6675N/119.5475E	k__Bacteria (UID2495)	2993	147	91	21	118	7	1	0	0	83.2	8.79	0	d__Bacteria;p__Gemmatimonadota;c__Gemmatimonadetes;o__Gemmatimonadales;f__GWC2-71-9;g__;s__	N/A	N/A	N/A	N/A	N/A	GCA_009692185.1	95	d__Bacteria;p__Gemmatimonadota;c__Gemmatimonadetes;o__Gemmatimonadales;f__GWC2-71-9;g__SHZT01;s__SHZT01 sp009692185	75.77	0.07	d__Bacteria;p__Gemmatimonadota;c__Gemmatimonadetes;o__Gemmatimonadales;f__GWC2-71-9;g__;s__	taxonomic classification defined by topology and ANI	N/A	N/A	71.37
	M3-38_Bin_451	Group3	Y	Yes	Gemmatimonadetes	d__Bacteria;p__Gemmatimonadota;c__Gemmatimonadetes;o__KS3-K002;f__JABDQB01;g__JABDQB01;s__	N	2.93483	3.34454	354	56434	10724	66.79	2973	2934832	2004	8290.5	Bohai Sea M3, China	Coastal Sediment	38.6675N/119.5475E	k__Bacteria (UID2495)	2993	147	91	13	132	2	0	0	0	87.75	2.2	0	d__Bacteria;p__Gemmatimonadota;c__Gemmatimonadetes;o__KS3-K002;f__JABDQB01;g__JABDQB01;s__	N/A	N/A	N/A	N/A	N/A	GCA_013042495.1	95	d__Bacteria;p__Gemmatimonadota;c__Gemmatimonadetes;o__KS3-K002;f__JABDQB01;g__JABDQB01;s__JABDQB01 sp013042495	77.71	0.27	d__Bacteria;p__Gemmatimonadota;c__Gemmatimonadetes;o__KS3-K002;f__JABDQB01;g__;s__	taxonomic classification defined by topology and ANI	N/A	N/A	86.32
	M3-38_Bin_457	Group2	N	Yes	Gemmatimonadetes	d__Bacteria;p__Gemmatimonadota;c__Gemmatimonadetes;o__Gemmatimonadales;f__GWC2-71-9;g__WVYX01;s__	N	3.88453	5.42684	840	26380	5116	59.35	4205	3884533	2003	4624.4	Bohai Sea M3, China	Coastal Sediment	38.6675N/119.5475E	k__Bacteria (UID2495)	2993	147	91	38	104	5	0	0	0	71.58	3.36	20	d__Bacteria;p__Gemmatimonadota;c__Gemmatimonadetes;o__Gemmatimonadales;f__GWC2-71-9;g__WVYX01;s__	N/A	N/A	N/A	N/A	N/A	GCA_011772755.1	95	d__Bacteria;p__Gemmatimonadota;c__Gemmatimonadetes;o__Gemmatimonadales;f__GWC2-71-9;g__WVYX01;s__WVYX01 sp011772755	76.94	0.05	d__Bacteria;p__Gemmatimonadota;c__Gemmatimonadetes;o__Gemmatimonadales;f__GWC2-71-9;g__;s__	taxonomic classification defined by topology and ANI	N/A	N/A	64.48
	M3-38_Bin_47	Group3	Y	Yes	Gemmatimonadetes	d__Bacteria;p__Gemmatimonadota;c__Gemmatimonadetes;o__KS3-K002;f__JABDQB01;g__;s__	N	3.15076	3.70939	210	90005	20362	66.1	3013	3150756	2102	15003.6	Bohai Sea M3, China	Coastal Sediment	38.6675N/119.5475E	k__Bacteria (UID2495)	2993	147	91	23	120	4	0	0	0	84.94	3.85	25	d__Bacteria;p__Gemmatimonadota;c__Gemmatimonadetes;o__KS3-K002;f__JABDQB01;g__;s__	N/A	N/A	N/A	N/A	N/A	N/A	N/A	N/A	N/A	N/A	d__Bacteria;p__Gemmatimonadota;c__Gemmatimonadetes;o__KS3-K002;f__JABDQB01;g__;s__	taxonomic novelty determined using RED	N/A	N/A	75.04
	M3-38_Bin_67	Group3	N	Yes	Gemmatimonadetes	d__Bacteria;p__Gemmatimonadota;c__Gemmatimonadetes;o__KS3-K002;f__JABDQB01;g__;s__	N	2.51506	4.05851	537	38703	5294	65.57	2802	2515059	2001	4683.5	Bohai Sea M3, China	Coastal Sediment	38.6675N/119.5475E	k__Bacteria (UID2495)	2993	147	91	42	104	1	0	0	0	61.97	0.06	0	d__Bacteria;p__Gemmatimonadota;c__Gemmatimonadetes;o__KS3-K002;f__JABDQB01;g__;s__	N/A	N/A	N/A	N/A	N/A	N/A	N/A	N/A	N/A	N/A	d__Bacteria;p__Gemmatimonadota;c__Gemmatimonadetes;o__KS3-K002;f__JABDQB01;g__;s__	taxonomic novelty determined using RED	N/A	N/A	55.83
	M3-38_Bin_71	Group2	N	Yes	Gemmatimonadetes	d__Bacteria;p__Gemmatimonadota;c__Gemmatimonadetes;o__Gemmatimonadales;f__GWC2-71-9;g__WVYX01;s__	N	3.37497	3.77894	332	81603	18920	67.28	3318	3374970	2001	10165.6	Bohai Sea M3, China	Coastal Sediment	38.6675N/119.5475E	k__Bacteria (UID2495)	2993	147	91	23	116	8	0	0	0	89.31	6.69	12.5	d__Bacteria;p__Gemmatimonadota;c__Gemmatimonadetes;o__Gemmatimonadales;f__GWC2-71-9;g__WVYX01;s__	N/A	N/A	N/A	N/A	N/A	GCA_011772755.1	95	d__Bacteria;p__Gemmatimonadota;c__Gemmatimonadetes;o__Gemmatimonadales;f__GWC2-71-9;g__WVYX01;s__WVYX01 sp011772755	76.88	0.21	d__Bacteria;p__Gemmatimonadota;c__Gemmatimonadetes;o__Gemmatimonadales;f__GWC2-71-9;g__;s__	taxonomic classification defined by topology and ANI	N/A	N/A	76.95
	M3-38_Bin_8	Group4	N	Yes	Gemmatimonadetes	d__Bacteria;p__Gemmatimonadota;c__Gemmatimonadetes;o__Longimicrobiales;f__UBA6960;g__;s__	N	4.20078	6.92512	1238	15225	3380	64.03	4557	4200779	2000	3393.2	Bohai Sea M3, China	Coastal Sediment	38.6675N/119.5475E	k__Bacteria (UID2495)	2993	147	91	59	80	7	1	0	0	60.66	9.34	0	d__Bacteria;p__Gemmatimonadota;c__Gemmatimonadetes;o__Longimicrobiales;f__UBA6960;g__;s__	N/A	N/A	N/A	N/A	N/A	N/A	N/A	N/A	N/A	N/A	d__Bacteria;p__Gemmatimonadota;c__Gemmatimonadetes;o__Longimicrobiales;f__UBA6960;g__;s__	taxonomic classification fully defined by topology	N/A	N/A	45.7
	M3-44_Bin_101	Group2	Y	Yes	Gemmatimonadetes	d__Bacteria;p__Gemmatimonadota;c__Gemmatimonadetes;o__Gemmatimonadales;f__GWC2-71-9;g__WVYX01;s__	N	3.96236	4.5644	789	41068	6021	60.9	4424	3962359	2000	5022	Bohai Sea M3, China	Coastal Sediment	38.6675N/119.5475E	k__Bacteria (UID2495)	2993	147	91	12	130	5	0	0	0	86.81	3.36	20	d__Bacteria;p__Gemmatimonadota;c__Gemmatimonadetes;o__Gemmatimonadales;f__GWC2-71-9;g__WVYX01;s__	N/A	N/A	N/A	N/A	N/A	GCA_011772755.1	95	d__Bacteria;p__Gemmatimonadota;c__Gemmatimonadetes;o__Gemmatimonadales;f__GWC2-71-9;g__WVYX01;s__WVYX01 sp011772755	75.92	0.04	d__Bacteria;p__Gemmatimonadota;c__Gemmatimonadetes;o__Gemmatimonadales;f__GWC2-71-9;g__;s__	taxonomic classification defined by topology and ANI	N/A	N/A	82.01
	M3-44_Bin_102	Group3	N	Yes	Gemmatimonadetes	d__Bacteria;p__Gemmatimonadota;c__Gemmatimonadetes;o__KS3-K002;f__;g__;s__	N	3.63865	4.14803	343	64968	18009	66.13	3720	3638648	2040	10608.3	Bohai Sea M3, China	Coastal Sediment	38.6675N/119.5475E	k__Bacteria (UID2495)	2993	147	91	15	125	7	0	0	0	87.72	7.69	42.86	d__Bacteria;p__Gemmatimonadota;c__Gemmatimonadetes;o__KS3-K002;f__;g__;s__	N/A	N/A	N/A	N/A	N/A	N/A	N/A	N/A	N/A	N/A	d__Bacteria;p__Gemmatimonadota;c__Gemmatimonadetes;o__KS3-K002;f__;g__;s__	taxonomic novelty determined using RED	N/A	N/A	77.78
	M3-44_Bin_116	Group2	N	Yes	Gemmatimonadetes	d__Bacteria;p__Gemmatimonadota;c__Gemmatimonadetes;o__Gemmatimonadales;f__GWC2-71-9;g__WVYX01;s__	N	6.25474	11.6108	1698	48693	3703	60.07	7084	6254741	2000	3683.6	Bohai Sea M3, China	Coastal Sediment	38.6675N/119.5475E	k__Bacteria (UID2495)	2993	147	91	55	82	10	0	0	0	53.87	5.99	0	d__Bacteria;p__Gemmatimonadota;c__Gemmatimonadetes;o__Gemmatimonadales;f__GWC2-71-9;g__WVYX01;s__	N/A	N/A	N/A	N/A	N/A	GCA_011772755.1	95	d__Bacteria;p__Gemmatimonadota;c__Gemmatimonadetes;o__Gemmatimonadales;f__GWC2-71-9;g__WVYX01;s__WVYX01 sp011772755	76.31	0.03	d__Bacteria;p__Gemmatimonadota;c__Gemmatimonadetes;o__Gemmatimonadales;f__GWC2-71-9;g__;s__	taxonomic classification defined by topology and ANI	N/A	N/A	49.59
	M3-44_Bin_123	Group2	N	Yes	Gemmatimonadetes	d__Bacteria;p__Gemmatimonadota;c__Gemmatimonadetes;o__Gemmatimonadales;f__GWC2-71-9;g__WVYX01;s__	N	5.94439	6.25792	522	129635	18916	64.09	5551	5944394	2000	11387.7	Bohai Sea M3, China	Coastal Sediment	38.6675N/119.5475E	k__Bacteria (UID2495)	2993	147	91	6	134	7	0	0	0	94.99	5.62	42.86	d__Bacteria;p__Gemmatimonadota;c__Gemmatimonadetes;o__Gemmatimonadales;f__GWC2-71-9;g__WVYX01;s__	N/A	N/A	N/A	N/A	N/A	GCA_011772755.1	95	d__Bacteria;p__Gemmatimonadota;c__Gemmatimonadetes;o__Gemmatimonadales;f__GWC2-71-9;g__WVYX01;s__WVYX01 sp011772755	76.47	0.09	d__Bacteria;p__Gemmatimonadota;c__Gemmatimonadetes;o__Gemmatimonadales;f__GWC2-71-9;g__;s__	taxonomic classification defined by topology and ANI	N/A	N/A	87.49
	M3-44_Bin_125	Group2	Y	Yes	Gemmatimonadetes	d__Bacteria;p__Gemmatimonadota;c__Gemmatimonadetes;o__Gemmatimonadales;f__GWC2-71-9;g__WVYX01;s__	N	6.15751	6.33163	752	77339	14403	59.39	6049	6157512	2002	8188.2	Bohai Sea M3, China	Coastal Sediment	38.6675N/119.5475E	k__Bacteria (UID2495)	2993	147	91	3	139	5	0	0	0	97.25	4.95	20	d__Bacteria;p__Gemmatimonadota;c__Gemmatimonadetes;o__Gemmatimonadales;f__GWC2-71-9;g__WVYX01;s__	N/A	N/A	N/A	N/A	N/A	GCA_011772755.1	95	d__Bacteria;p__Gemmatimonadota;c__Gemmatimonadetes;o__Gemmatimonadales;f__GWC2-71-9;g__WVYX01;s__WVYX01 sp011772755	77.25	0.07	d__Bacteria;p__Gemmatimonadota;c__Gemmatimonadetes;o__Gemmatimonadales;f__GWC2-71-9;g__;s__	taxonomic classification defined by topology and ANI	N/A	N/A	88.41
	M3-44_Bin_126	Group1	Y	Yes	Gemmatimonadetes	d__Bacteria;p__Gemmatimonadota;c__Gemmatimonadetes;o__JACCXV01;f__;g__;s__	N	2.4458	2.78058	392	35299	7659	62.14	2739	2445800	2015	6239.3	Bohai Sea M3, China	Coastal Sediment	38.6675N/119.5475E	k__Bacteria (UID2495)	2993	147	91	18	125	4	0	0	0	87.96	3.48	50	d__Bacteria;p__Gemmatimonadota;c__Gemmatimonadetes;o__JACCXV01;f__;g__;s__	N/A	N/A	N/A	N/A	N/A	GCA_013696835.1	95	d__Bacteria;p__Gemmatimonadota;c__Gemmatimonadetes;o__JACCXV01;f__JACCXV01;g__JACCXV01;s__JACCXV01 sp013696835	74.96	0.04	d__Bacteria;p__Gemmatimonadota;c__Gemmatimonadetes;o__;f__;g__;s__	taxonomic classification defined by topology and ANI	N/A	N/A	79.25
	M3-44_Bin_129	Group2	Y	Yes	Gemmatimonadetes	d__Bacteria;p__Gemmatimonadota;c__Gemmatimonadetes;o__Gemmatimonadales;f__GWC2-71-9;g__WVYX01;s__	N	4.51543	4.66953	159	487337	86602	64.23	4224	4515433	2061	28398.9	Bohai Sea M3, China	Coastal Sediment	38.6675N/119.5475E	k__Bacteria (UID2495)	2993	147	91	3	141	3	0	0	0	96.7	3.3	33.33	d__Bacteria;p__Gemmatimonadota;c__Gemmatimonadetes;o__Gemmatimonadales;f__GWC2-71-9;g__WVYX01;s__	N/A	N/A	N/A	N/A	N/A	GCA_011772755.1	95	d__Bacteria;p__Gemmatimonadota;c__Gemmatimonadetes;o__Gemmatimonadales;f__GWC2-71-9;g__WVYX01;s__WVYX01 sp011772755	76.8	0.12	d__Bacteria;p__Gemmatimonadota;c__Gemmatimonadetes;o__Gemmatimonadales;f__GWC2-71-9;g__;s__	taxonomic classification defined by topology and ANI	N/A	N/A	92.5
	M3-44_Bin_136	Group3	Y	Yes	Gemmatimonadetes	d__Bacteria;p__Gemmatimonadota;c__Gemmatimonadetes;o__KS3-K002;f__JABDQB01;g__;s__	N	4.10755	4.5034	103	122806	61986	66.71	3660	4107552	3337	39879.1	Bohai Sea M3, China	Coastal Sediment	38.6675N/119.5475E	k__Bacteria (UID2495)	2993	147	91	25	119	3	0	0	0	91.21	3.3	0	d__Bacteria;p__Gemmatimonadota;c__Gemmatimonadetes;o__KS3-K002;f__JABDQB01;g__;s__	N/A	N/A	N/A	N/A	N/A	N/A	N/A	N/A	N/A	N/A	d__Bacteria;p__Gemmatimonadota;c__Gemmatimonadetes;o__KS3-K002;f__JABDQB01;g__;s__	taxonomic novelty determined using RED	N/A	N/A	81.52
	M3-44_Bin_137	Group3	Y	Yes	Gemmatimonadetes	d__Bacteria;p__Gemmatimonadota;c__Gemmatimonadetes;o__KS3-K002;f__JABDQB01;g__;s__	N	3.7497	4.65512	118	164146	48572	65.89	3388	3749699	2333	31777.1	Bohai Sea M3, China	Coastal Sediment	38.6675N/119.5475E	k__Bacteria (UID2495)	2993	147	91	27	116	4	0	0	0	80.55	4.4	25	d__Bacteria;p__Gemmatimonadota;c__Gemmatimonadetes;o__KS3-K002;f__JABDQB01;g__;s__	N/A	N/A	N/A	N/A	N/A	N/A	N/A	N/A	N/A	N/A	d__Bacteria;p__Gemmatimonadota;c__Gemmatimonadetes;o__KS3-K002;f__JABDQB01;g__;s__	taxonomic novelty determined using RED	N/A	N/A	79.87
	M3-44_Bin_147	Group2	Y	Yes	Gemmatimonadetes	d__Bacteria;p__Gemmatimonadota;c__Gemmatimonadetes;o__Gemmatimonadales;f__GWC2-71-9;g__WVYX01;s__	N	5.01545	5.13142	404	113599	21021	63.81	4669	5015448	2011	12414.5	Bohai Sea M3, China	Coastal Sediment	38.6675N/119.5475E	k__Bacteria (UID2495)	2993	147	91	3	140	4	0	0	0	97.74	4.4	25	d__Bacteria;p__Gemmatimonadota;c__Gemmatimonadetes;o__Gemmatimonadales;f__GWC2-71-9;g__WVYX01;s__	N/A	N/A	N/A	N/A	N/A	GCA_011772755.1	95	d__Bacteria;p__Gemmatimonadota;c__Gemmatimonadetes;o__Gemmatimonadales;f__GWC2-71-9;g__WVYX01;s__WVYX01 sp011772755	77.36	0.09	d__Bacteria;p__Gemmatimonadota;c__Gemmatimonadetes;o__Gemmatimonadales;f__GWC2-71-9;g__;s__	taxonomic classification defined by topology and ANI	N/A	N/A	89.72
	M3-44_Bin_14	Group2	Y	Yes	Gemmatimonadetes	d__Bacteria;p__Gemmatimonadota;c__Gemmatimonadetes;o__Gemmatimonadales;f__GWC2-71-9;g__WVYX01;s__	N	5.18668	5.75978	566	55668	12576	57.76	4991	5186678	2011	9163.7	Bohai Sea M3, China	Coastal Sediment	38.6675N/119.5475E	k__Bacteria (UID2495)	2993	147	91	10	134	3	0	0	0	90.05	3.3	0	d__Bacteria;p__Gemmatimonadota;c__Gemmatimonadetes;o__Gemmatimonadales;f__GWC2-71-9;g__WVYX01;s__	N/A	N/A	N/A	N/A	N/A	GCA_011772755.1	95	d__Bacteria;p__Gemmatimonadota;c__Gemmatimonadetes;o__Gemmatimonadales;f__GWC2-71-9;g__WVYX01;s__WVYX01 sp011772755	76.59	0.03	d__Bacteria;p__Gemmatimonadota;c__Gemmatimonadetes;o__Gemmatimonadales;f__GWC2-71-9;g__;s__	taxonomic classification defined by topology and ANI	N/A	N/A	82.11
	M3-44_Bin_156	Group2	N	Yes	Gemmatimonadetes	d__Bacteria;p__Gemmatimonadota;c__Gemmatimonadetes;o__Gemmatimonadales;f__GWC2-71-9;g__WVYX01;s__	N	6.84118	8.13748	517	132228	28109	62.83	6557	6841177	2006	13232.5	Bohai Sea M3, China	Coastal Sediment	38.6675N/119.5475E	k__Bacteria (UID2495)	2993	147	91	16	114	17	0	0	0	84.07	9.19	17.65	d__Bacteria;p__Gemmatimonadota;c__Gemmatimonadetes;o__Gemmatimonadales;f__GWC2-71-9;g__WVYX01;s__	N/A	N/A	N/A	N/A	N/A	GCA_011772755.1	95	d__Bacteria;p__Gemmatimonadota;c__Gemmatimonadetes;o__Gemmatimonadales;f__GWC2-71-9;g__WVYX01;s__WVYX01 sp011772755	76.44	0.09	d__Bacteria;p__Gemmatimonadota;c__Gemmatimonadetes;o__Gemmatimonadales;f__GWC2-71-9;g__;s__	taxonomic classification defined by topology and ANI	N/A	N/A	75.8
	M3-44_Bin_163	Group1	Y	Yes	Gemmatimonadetes	d__Bacteria;p__Gemmatimonadota;c__Gemmatimonadetes;o__JACCXV01;f__;g__;s__	N	2.4427	2.81709	326	65330	10892	62.03	2668	2442702	2006	7493	Bohai Sea M3, China	Coastal Sediment	38.6675N/119.5475E	k__Bacteria (UID2495)	2993	147	91	24	117	6	0	0	0	86.71	4.13	50	d__Bacteria;p__Gemmatimonadota;c__Gemmatimonadetes;o__JACCXV01;f__;g__;s__	N/A	N/A	N/A	N/A	N/A	GCA_013696835.1	95	d__Bacteria;p__Gemmatimonadota;c__Gemmatimonadetes;o__JACCXV01;f__JACCXV01;g__JACCXV01;s__JACCXV01 sp013696835	75.67	0.03	d__Bacteria;p__Gemmatimonadota;c__Gemmatimonadetes;o__;f__;g__;s__	taxonomic classification defined by topology and ANI	N/A	N/A	75.14
	M3-44_Bin_197	Group3	Y	Yes	Gemmatimonadetes	d__Bacteria;p__Gemmatimonadota;c__Gemmatimonadetes;o__KS3-K002;f__KS3-K002;g__;s__	N	3.25339	3.66043	437	37887	9773	63.36	3314	3253388	2038	7444.8	Bohai Sea M3, China	Coastal Sediment	38.6675N/119.5475E	k__Bacteria (UID2495)	2993	147	91	12	134	1	0	0	0	88.88	1.1	0	d__Bacteria;p__Gemmatimonadota;c__Gemmatimonadetes;o__KS3-K002;f__KS3-K002;g__;s__	N/A	N/A	N/A	N/A	N/A	GCA_011774835.1	95	d__Bacteria;p__Gemmatimonadota;c__Gemmatimonadetes;o__KS3-K002;f__KS3-K002;g__KS3-K002;s__KS3-K002 sp011774835	77.01	0.18	d__Bacteria;p__Gemmatimonadota;c__Gemmatimonadetes;o__KS3-K002;f__;g__;s__	taxonomic classification defined by topology and ANI	N/A	N/A	80.92
	M3-44_Bin_202	Group2	N	Yes	Gemmatimonadetes	d__Bacteria;p__Gemmatimonadota;c__Gemmatimonadetes;o__Gemmatimonadales;f__GWC2-71-9;g__WVYX01;s__	N	4.01742	7.00021	898	27274	5036	63.38	4243	4017418	2002	4473.7	Bohai Sea M3, China	Coastal Sediment	38.6675N/119.5475E	k__Bacteria (UID2495)	2993	147	91	49	93	5	0	0	0	57.39	5.49	40	d__Bacteria;p__Gemmatimonadota;c__Gemmatimonadetes;o__Gemmatimonadales;f__GWC2-71-9;g__WVYX01;s__	N/A	N/A	N/A	N/A	N/A	GCA_011772755.1	95	d__Bacteria;p__Gemmatimonadota;c__Gemmatimonadetes;o__Gemmatimonadales;f__GWC2-71-9;g__WVYX01;s__WVYX01 sp011772755	76.14	0.06	d__Bacteria;p__Gemmatimonadota;c__Gemmatimonadetes;o__Gemmatimonadales;f__GWC2-71-9;g__;s__	taxonomic classification defined by topology and ANI	N/A	N/A	53.31
	M3-44_Bin_227	Group3	N	Yes	Gemmatimonadetes	d__Bacteria;p__Gemmatimonadota;c__Gemmatimonadetes;o__KS3-K002;f__KS3-K002;g__;s__	N	3.09676	5.74751	818	15886	3977	64	3326	3096756	2001	3785.8	Bohai Sea M3, China	Coastal Sediment	38.6675N/119.5475E	k__Bacteria (UID2495)	2993	147	91	52	78	17	0	0	0	53.88	9.51	17.65	d__Bacteria;p__Gemmatimonadota;c__Gemmatimonadetes;o__KS3-K002;f__KS3-K002;g__;s__	N/A	N/A	N/A	N/A	N/A	GCA_011774835.1	95	d__Bacteria;p__Gemmatimonadota;c__Gemmatimonadetes;o__KS3-K002;f__KS3-K002;g__KS3-K002;s__KS3-K002 sp011774835	76.98	0.22	d__Bacteria;p__Gemmatimonadota;c__Gemmatimonadetes;o__KS3-K002;f__;g__;s__	taxonomic classification defined by topology and ANI	N/A	N/A	46.36
	M3-44_Bin_235	Group3	Y	Yes	Gemmatimonadetes	d__Bacteria;p__Gemmatimonadota;c__Gemmatimonadetes;o__KS3-K002;f__KS3-K002;g__KS3-K002;s__	N	4.09382	4.45175	347	106482	16018	64.3	3769	4093825	2006	11797.8	Bohai Sea M3, China	Coastal Sediment	38.6675N/119.5475E	k__Bacteria (UID2495)	2993	147	91	10	132	5	0	0	0	91.96	4.95	20	d__Bacteria;p__Gemmatimonadota;c__Gemmatimonadetes;o__KS3-K002;f__KS3-K002;g__KS3-K002;s__	N/A	N/A	N/A	N/A	N/A	GCA_011774835.1	95	d__Bacteria;p__Gemmatimonadota;c__Gemmatimonadetes;o__KS3-K002;f__KS3-K002;g__KS3-K002;s__KS3-K002 sp011774835	77.7	0.25	d__Bacteria;p__Gemmatimonadota;c__Gemmatimonadetes;o__KS3-K002;f__;g__;s__	taxonomic classification defined by topology and ANI	N/A	N/A	80.74
	M3-44_Bin_248	Group3	N	Yes	Gemmatimonadetes	d__Bacteria;p__Gemmatimonadota;c__Gemmatimonadetes;o__KS3-K002;f__KS3-K002;g__KS3-K002;s__	N	5.04404	6.11993	640	48505	10343	63.32	4831	5044043	2015	7881.3	Bohai Sea M3, China	Coastal Sediment	38.6675N/119.5475E	k__Bacteria (UID2495)	2993	147	91	18	117	12	0	0	0	82.42	7.92	33.33	d__Bacteria;p__Gemmatimonadota;c__Gemmatimonadetes;o__KS3-K002;f__KS3-K002;g__KS3-K002;s__	N/A	N/A	N/A	N/A	N/A	GCA_011774835.1	95	d__Bacteria;p__Gemmatimonadota;c__Gemmatimonadetes;o__KS3-K002;f__KS3-K002;g__KS3-K002;s__KS3-K002 sp011774835	76.91	0.17	d__Bacteria;p__Gemmatimonadota;c__Gemmatimonadetes;o__KS3-K002;f__;g__;s__	taxonomic classification defined by topology and ANI	N/A	N/A	71.67
	M3-44_Bin_252	Group2	N	Yes	Gemmatimonadetes	d__Bacteria;p__Gemmatimonadota;c__Gemmatimonadetes;o__Gemmatimonadales;f__GWC2-71-9;g__WVYX01;s__	N	2.93627	3.69342	142	160902	37348	63.59	2719	2936268	2339	20677.9	Bohai Sea M3, China	Coastal Sediment	38.6675N/119.5475E	k__Bacteria (UID2495)	2993	147	91	34	113	0	0	0	0	79.5	0	0	d__Bacteria;p__Gemmatimonadota;c__Gemmatimonadetes;o__Gemmatimonadales;f__GWC2-71-9;g__WVYX01;s__	N/A	N/A	N/A	N/A	N/A	GCA_011772755.1	95	d__Bacteria;p__Gemmatimonadota;c__Gemmatimonadetes;o__Gemmatimonadales;f__GWC2-71-9;g__WVYX01;s__WVYX01 sp011772755	76.38	0.1	d__Bacteria;p__Gemmatimonadota;c__Gemmatimonadetes;o__Gemmatimonadales;f__GWC2-71-9;g__;s__	taxonomic classification defined by topology and ANI	N/A	N/A	72.11
	M3-44_Bin_269	Group3	Y	Yes	Gemmatimonadetes	d__Bacteria;p__Gemmatimonadota;c__Gemmatimonadetes;o__KS3-K002;f__JABDQB01;g__JABDQB01;s__	N	3.06932	3.26662	198	105734	24871	66.15	2985	3069318	2005	15501.6	Bohai Sea M3, China	Coastal Sediment	38.6675N/119.5475E	k__Bacteria (UID2495)	2993	147	91	6	138	3	0	0	0	93.96	3.3	0	d__Bacteria;p__Gemmatimonadota;c__Gemmatimonadetes;o__KS3-K002;f__JABDQB01;g__JABDQB01;s__	N/A	N/A	N/A	N/A	N/A	GCA_013042495.1	95	d__Bacteria;p__Gemmatimonadota;c__Gemmatimonadetes;o__KS3-K002;f__JABDQB01;g__JABDQB01;s__JABDQB01 sp013042495	77.26	0.19	d__Bacteria;p__Gemmatimonadota;c__Gemmatimonadetes;o__KS3-K002;f__JABDQB01;g__;s__	taxonomic classification defined by topology and ANI	N/A	N/A	85.98
	M3-44_Bin_295	Group3	Y	Yes	Gemmatimonadetes	d__Bacteria;p__Gemmatimonadota;c__Gemmatimonadetes;o__KS3-K002;f__JABDQB01;g__JABDQB01;s__	N	2.8901	3.05798	376	40326	9737	66.81	2949	2890095	2013	7686.4	Bohai Sea M3, China	Coastal Sediment	38.6675N/119.5475E	k__Bacteria (UID2495)	2993	147	91	5	138	4	0	0	0	94.51	4.4	25	d__Bacteria;p__Gemmatimonadota;c__Gemmatimonadetes;o__KS3-K002;f__JABDQB01;g__JABDQB01;s__	N/A	N/A	N/A	N/A	N/A	GCA_013042495.1	95	d__Bacteria;p__Gemmatimonadota;c__Gemmatimonadetes;o__KS3-K002;f__JABDQB01;g__JABDQB01;s__JABDQB01 sp013042495	77.75	0.26	d__Bacteria;p__Gemmatimonadota;c__Gemmatimonadetes;o__KS3-K002;f__JABDQB01;g__;s__	taxonomic classification defined by topology and ANI	N/A	N/A	85.43
	M3-44_Bin_296	Group3	N	Yes	Gemmatimonadetes	d__Bacteria;p__Gemmatimonadota;c__Gemmatimonadetes;o__KS3-K002;f__;g__;s__	N	2.96539	4.1186	377	29984	9906	66.27	3014	2965393	2001	7865.8	Bohai Sea M3, China	Coastal Sediment	38.6675N/119.5475E	k__Bacteria (UID2495)	2993	147	91	36	107	4	0	0	0	72	2.36	25	d__Bacteria;p__Gemmatimonadota;c__Gemmatimonadetes;o__KS3-K002;f__;g__;s__	N/A	N/A	N/A	N/A	N/A	N/A	N/A	N/A	N/A	N/A	d__Bacteria;p__Gemmatimonadota;c__Gemmatimonadetes;o__KS3-K002;f__;g__;s__	taxonomic novelty determined using RED	N/A	N/A	68.65
	M3-44_Bin_298	Group2	N	Yes	Gemmatimonadetes	d__Bacteria;p__Gemmatimonadota;c__Gemmatimonadetes;o__Gemmatimonadales;f__GWC2-71-9;g__JABDII01;s__	N	1.49558	2.73214	339	19943	4764	63.8	1824	1495575	2004	4411.7	Bohai Sea M3, China	Coastal Sediment	38.6675N/119.5475E	k__Bacteria (UID2495)	2993	147	91	62	81	4	0	0	0	54.74	4.4	50	d__Bacteria;p__Gemmatimonadota;c__Gemmatimonadetes;o__Gemmatimonadales;f__GWC2-71-9;g__JABDII01;s__	N/A	N/A	N/A	N/A	N/A	GCA_013003805.1	95	d__Bacteria;p__Gemmatimonadota;c__Gemmatimonadetes;o__Gemmatimonadales;f__GWC2-71-9;g__JABDII01;s__JABDII01 sp013003805	84.63	0.66	d__Bacteria;p__Gemmatimonadota;c__Gemmatimonadetes;o__Gemmatimonadales;f__GWC2-71-9;g__;s__	taxonomic classification defined by topology and ANI	N/A	N/A	45.42
	M3-44_Bin_339	Group3	Y	Yes	Gemmatimonadetes	d__Bacteria;p__Gemmatimonadota;c__Gemmatimonadetes;o__KS3-K002;f__KS3-K002;g__KS3-K002;s__	N	5.50461	5.89295	494	150409	18159	63.05	5108	5504607	2005	11142.9	Bohai Sea M3, China	Coastal Sediment	38.6675N/119.5475E	k__Bacteria (UID2495)	2993	147	91	7	138	2	0	0	0	93.41	2.2	0	d__Bacteria;p__Gemmatimonadota;c__Gemmatimonadetes;o__KS3-K002;f__KS3-K002;g__KS3-K002;s__	N/A	N/A	N/A	N/A	N/A	GCA_011774835.1	95	d__Bacteria;p__Gemmatimonadota;c__Gemmatimonadetes;o__KS3-K002;f__KS3-K002;g__KS3-K002;s__KS3-K002 sp011774835	76.96	0.19	d__Bacteria;p__Gemmatimonadota;c__Gemmatimonadetes;o__KS3-K002;f__;g__;s__	taxonomic classification defined by topology and ANI	N/A	N/A	85.55
	M3-44_Bin_350	Group3	N	Yes	Gemmatimonadetes	d__Bacteria;p__Gemmatimonadota;c__Gemmatimonadetes;o__KS3-K002;f__KS3-K002;g__KS3-K002;s__	N	2.22595	2.99268	403	35006	6688	65.33	2416	2225953	2002	5523.5	Bohai Sea M3, China	Coastal Sediment	38.6675N/119.5475E	k__Bacteria (UID2495)	2993	147	91	29	117	1	0	0	0	74.38	1.1	100	d__Bacteria;p__Gemmatimonadota;c__Gemmatimonadetes;o__KS3-K002;f__KS3-K002;g__KS3-K002;s__	N/A	N/A	N/A	N/A	N/A	GCA_011774835.1	95	d__Bacteria;p__Gemmatimonadota;c__Gemmatimonadetes;o__KS3-K002;f__KS3-K002;g__KS3-K002;s__KS3-K002 sp011774835	77.95	0.32	d__Bacteria;p__Gemmatimonadota;c__Gemmatimonadetes;o__KS3-K002;f__;g__;s__	taxonomic classification defined by topology and ANI	N/A	N/A	63.69
	M3-44_Bin_354	Group3	N	Yes	Gemmatimonadetes	d__Bacteria;p__Gemmatimonadota;c__Gemmatimonadetes;o__KS3-K002;f__JABDQB01;g__;s__	N	3.30309	3.62141	299	105468	16692	64.9	3278	3303090	2005	11047.1	Bohai Sea M3, China	Coastal Sediment	38.6675N/119.5475E	k__Bacteria (UID2495)	2993	147	91	8	134	5	0	0	0	91.21	5.49	40	d__Bacteria;p__Gemmatimonadota;c__Gemmatimonadetes;o__KS3-K002;f__JABDQB01;g__;s__	N/A	N/A	N/A	N/A	N/A	N/A	N/A	N/A	N/A	N/A	d__Bacteria;p__Gemmatimonadota;c__Gemmatimonadetes;o__KS3-K002;f__JABDQB01;g__;s__	taxonomic novelty determined using RED	N/A	N/A	81.04
	M3-44_Bin_359	Group2	Y	Yes	Gemmatimonadetes	d__Bacteria;p__Gemmatimonadota;c__Gemmatimonadetes;o__Gemmatimonadales;f__GWC2-71-9;g__WVYX01;s__	N	4.95353	5.39836	507	115198	14517	60.44	4877	4953531	2002	9770.3	Bohai Sea M3, China	Coastal Sediment	38.6675N/119.5475E	k__Bacteria (UID2495)	2993	147	91	8	135	4	0	0	0	91.76	3.36	0	d__Bacteria;p__Gemmatimonadota;c__Gemmatimonadetes;o__Gemmatimonadales;f__GWC2-71-9;g__WVYX01;s__	N/A	N/A	N/A	N/A	N/A	GCA_011772755.1	95	d__Bacteria;p__Gemmatimonadota;c__Gemmatimonadetes;o__Gemmatimonadales;f__GWC2-71-9;g__WVYX01;s__WVYX01 sp011772755	76.82	0.07	d__Bacteria;p__Gemmatimonadota;c__Gemmatimonadetes;o__Gemmatimonadales;f__GWC2-71-9;g__;s__	taxonomic classification defined by topology and ANI	N/A	N/A	85.27
	M3-44_Bin_379	Group2	Y	Yes	Gemmatimonadetes	d__Bacteria;p__Gemmatimonadota;c__Gemmatimonadetes;o__Gemmatimonadales;f__GWC2-71-9;g__WVYX01;s__	N	3.61218	3.73545	110	202789	74389	65.85	3339	3612178	2043	32838	Bohai Sea M3, China	Coastal Sediment	38.6675N/119.5475E	k__Bacteria (UID2495)	2993	147	91	3	141	3	0	0	0	96.7	3.3	33.33	d__Bacteria;p__Gemmatimonadota;c__Gemmatimonadetes;o__Gemmatimonadales;f__GWC2-71-9;g__WVYX01;s__	N/A	N/A	N/A	N/A	N/A	GCA_011772755.1	95	d__Bacteria;p__Gemmatimonadota;c__Gemmatimonadetes;o__Gemmatimonadales;f__GWC2-71-9;g__WVYX01;s__WVYX01 sp011772755	76.67	0.13	d__Bacteria;p__Gemmatimonadota;c__Gemmatimonadetes;o__Gemmatimonadales;f__GWC2-71-9;g__;s__	taxonomic classification defined by topology and ANI	N/A	N/A	92.34
	M3-44_Bin_381	Group3	Y	Yes	Gemmatimonadetes	d__Bacteria;p__Gemmatimonadota;c__Gemmatimonadetes;o__KS3-K002;f__KS3-K002;g__;s__	N	3.83173	4.60434	529	42165	8924	64.43	3796	3831733	2057	7243.4	Bohai Sea M3, China	Coastal Sediment	38.6675N/119.5475E	k__Bacteria (UID2495)	2993	147	91	25	117	5	0	0	0	83.22	4.95	20	d__Bacteria;p__Gemmatimonadota;c__Gemmatimonadetes;o__KS3-K002;f__KS3-K002;g__;s__	N/A	N/A	N/A	N/A	N/A	GCA_011774835.1	95	d__Bacteria;p__Gemmatimonadota;c__Gemmatimonadetes;o__KS3-K002;f__KS3-K002;g__KS3-K002;s__KS3-K002 sp011774835	77.3	0.24	d__Bacteria;p__Gemmatimonadota;c__Gemmatimonadetes;o__KS3-K002;f__;g__;s__	taxonomic classification defined by topology and ANI	N/A	N/A	69.92
	M3-44_Bin_388	Group3	Y	Yes	Gemmatimonadetes	d__Bacteria;p__Gemmatimonadota;c__Gemmatimonadetes;o__KS3-K002;f__JABDQB01;g__JABDQB01;s__	Y	2.80849	2.98331	127	159315	39178	65.85	2745	2808487	2026	22114.1	Bohai Sea M3, China	Coastal Sediment	38.6675N/119.5475E	k__Bacteria (UID2495)	2993	147	91	6	138	3	0	0	0	94.14	3.3	0	d__Bacteria;p__Gemmatimonadota;c__Gemmatimonadetes;o__KS3-K002;f__JABDQB01;g__JABDQB01;s__	N/A	N/A	N/A	N/A	N/A	GCA_013042495.1	95	d__Bacteria;p__Gemmatimonadota;c__Gemmatimonadetes;o__KS3-K002;f__JABDQB01;g__JABDQB01;s__JABDQB01 sp013042495	76.97	0.12	d__Bacteria;p__Gemmatimonadota;c__Gemmatimonadetes;o__KS3-K002;f__JABDQB01;g__;s__	taxonomic classification defined by topology and ANI	N/A	N/A	86.7
	M3-44_Bin_400	Group1	N	Yes	Gemmatimonadetes	d__Bacteria;p__Gemmatimonadota;c__Gemmatimonadetes;o__JACCXV01;f__;g__;s__	N	2.37701	2.6871	197	102564	18586	62.12	2551	2377005	2000	12066	Bohai Sea M3, China	Coastal Sediment	38.6675N/119.5475E	k__Bacteria (UID2495)	2993	147	91	13	118	14	2	0	0	88.46	8.87	55	d__Bacteria;p__Gemmatimonadota;c__Gemmatimonadetes;o__JACCXV01;f__;g__;s__	N/A	N/A	N/A	N/A	N/A	GCA_013696835.1	95	d__Bacteria;p__Gemmatimonadota;c__Gemmatimonadetes;o__JACCXV01;f__JACCXV01;g__JACCXV01;s__JACCXV01 sp013696835	75.6	0.03	d__Bacteria;p__Gemmatimonadota;c__Gemmatimonadetes;o__;f__;g__;s__	taxonomic classification defined by topology and ANI	N/A	N/A	76.41
	M3-44_Bin_409	Group2	N	Yes	Gemmatimonadetes	d__Bacteria;p__Gemmatimonadota;c__Gemmatimonadetes;o__Gemmatimonadales;f__GWC2-71-9;g__WVYX01;s__	N	4.73448	6.61332	860	22962	6425	62.66	4701	4734478	2004	5505.2	Bohai Sea M3, China	Coastal Sediment	38.6675N/119.5475E	k__Bacteria (UID2495)	2993	147	91	42	102	3	0	0	0	71.59	3.3	66.67	d__Bacteria;p__Gemmatimonadota;c__Gemmatimonadetes;o__Gemmatimonadales;f__GWC2-71-9;g__WVYX01;s__	N/A	N/A	N/A	N/A	N/A	GCA_011772755.1	95	d__Bacteria;p__Gemmatimonadota;c__Gemmatimonadetes;o__Gemmatimonadales;f__GWC2-71-9;g__WVYX01;s__WVYX01 sp011772755	75.84	0.06	d__Bacteria;p__Gemmatimonadota;c__Gemmatimonadetes;o__Gemmatimonadales;f__GWC2-71-9;g__;s__	taxonomic classification defined by topology and ANI	N/A	N/A	60.63
	M3-44_Bin_424	Group3	Y	Yes	Gemmatimonadetes	d__Bacteria;p__Gemmatimonadota;c__Gemmatimonadetes;o__KS3-K002;f__JABDQB01;g__;s__	N	3.9927	4.51101	235	81807	29296	66.53	3639	3992698	2080	16990.2	Bohai Sea M3, China	Coastal Sediment	38.6675N/119.5475E	k__Bacteria (UID2495)	2993	147	91	16	127	4	0	0	0	88.51	4.4	50	d__Bacteria;p__Gemmatimonadota;c__Gemmatimonadetes;o__KS3-K002;f__JABDQB01;g__;s__	N/A	N/A	N/A	N/A	N/A	N/A	N/A	N/A	N/A	N/A	d__Bacteria;p__Gemmatimonadota;c__Gemmatimonadetes;o__KS3-K002;f__JABDQB01;g__;s__	taxonomic novelty determined using RED	N/A	N/A	85.73
	M3-44_Bin_430	Group4	N	Yes	Gemmatimonadetes	d__Bacteria;p__Gemmatimonadota;c__Gemmatimonadetes;o__Longimicrobiales;f__UBA6960;g__SZUA-318;s__	N	2.53503	4.66341	760	19460	3323	68.18	2862	2535032	2001	3335.6	Bohai Sea M3, China	Coastal Sediment	38.6675N/119.5475E	k__Bacteria (UID2495)	2993	147	91	56	89	2	0	0	0	54.36	1.2	50	d__Bacteria;p__Gemmatimonadota;c__Gemmatimonadetes;o__Longimicrobiales;f__UBA6960;g__SZUA-318;s__	N/A	N/A	N/A	N/A	N/A	GCA_003248075.1	95	d__Bacteria;p__Gemmatimonadota;c__Gemmatimonadetes;o__Longimicrobiales;f__UBA6960;g__SZUA-318;s__SZUA-318 sp003248075	77.02	0.28	d__Bacteria;p__Gemmatimonadota;c__Gemmatimonadetes;o__Longimicrobiales;f__UBA6960;g__;s__	taxonomic classification defined by topology and ANI	N/A	N/A	49.37
	M3-44_Bin_431	Group3	Y	Yes	Gemmatimonadetes	d__Bacteria;p__Gemmatimonadota;c__Gemmatimonadetes;o__KS3-K002;f__JABDQB01;g__;s__	Y	3.31415	3.42725	49	512745	126507	65.15	3021	3314154	2484	67635.8	Bohai Sea M3, China	Coastal Sediment	38.6675N/119.5475E	k__Bacteria (UID2495)	2993	147	91	3	141	3	0	0	0	96.7	3.3	0	d__Bacteria;p__Gemmatimonadota;c__Gemmatimonadetes;o__KS3-K002;f__JABDQB01;g__;s__	N/A	N/A	N/A	N/A	N/A	N/A	N/A	N/A	N/A	N/A	d__Bacteria;p__Gemmatimonadota;c__Gemmatimonadetes;o__KS3-K002;f__JABDQB01;g__;s__	taxonomic novelty determined using RED	N/A	N/A	92.08
	M3-44_Bin_432	Group4	Y	Yes	Gemmatimonadetes	d__Bacteria;p__Gemmatimonadota;c__Gemmatimonadetes;o__Longimicrobiales;f__UBA6960;g__;s__	N	6.05312	6.60172	639	60272	13018	67.61	5562	6053115	2013	9472.8	Bohai Sea M3, China	Coastal Sediment	38.6675N/119.5475E	k__Bacteria (UID2495)	2993	147	91	9	134	4	0	0	0	91.69	3.36	25	d__Bacteria;p__Gemmatimonadota;c__Gemmatimonadetes;o__Longimicrobiales;f__UBA6960;g__;s__	N/A	N/A	N/A	N/A	N/A	N/A	N/A	N/A	N/A	N/A	d__Bacteria;p__Gemmatimonadota;c__Gemmatimonadetes;o__Longimicrobiales;f__UBA6960;g__;s__	taxonomic classification fully defined by topology	N/A	N/A	81.46
	M3-44_Bin_64	Group2	N	Yes	Gemmatimonadetes	d__Bacteria;p__Gemmatimonadota;c__Gemmatimonadetes;o__Gemmatimonadales;f__GWC2-71-9;g__WVYX01;s__	N	2.56621	3.38461	392	61131	8526	67.25	2758	2566211	2014	6546.5	Bohai Sea M3, China	Coastal Sediment	38.6675N/119.5475E	k__Bacteria (UID2495)	2993	147	91	26	120	1	0	0	0	75.82	0.06	100	d__Bacteria;p__Gemmatimonadota;c__Gemmatimonadetes;o__Gemmatimonadales;f__GWC2-71-9;g__WVYX01;s__	N/A	N/A	N/A	N/A	N/A	GCA_011772755.1	95	d__Bacteria;p__Gemmatimonadota;c__Gemmatimonadetes;o__Gemmatimonadales;f__GWC2-71-9;g__WVYX01;s__WVYX01 sp011772755	77.21	0.25	d__Bacteria;p__Gemmatimonadota;c__Gemmatimonadetes;o__Gemmatimonadales;f__GWC2-71-9;g__;s__	taxonomic classification defined by topology and ANI	N/A	N/A	73.26
	M3-44_Bin_68	Group2	N	Yes	Gemmatimonadetes	d__Bacteria;p__Gemmatimonadota;c__Gemmatimonadetes;o__Gemmatimonadales;f__GWC2-71-9;g__WVYX01;s__	N	3.59543	4.00115	373	104408	18593	66.32	3549	3595432	2001	9639.2	Bohai Sea M3, China	Coastal Sediment	38.6675N/119.5475E	k__Bacteria (UID2495)	2993	147	91	22	114	10	1	0	0	89.86	7.4	15.38	d__Bacteria;p__Gemmatimonadota;c__Gemmatimonadetes;o__Gemmatimonadales;f__GWC2-71-9;g__WVYX01;s__	N/A	N/A	N/A	N/A	N/A	GCA_011772755.1	95	d__Bacteria;p__Gemmatimonadota;c__Gemmatimonadetes;o__Gemmatimonadales;f__GWC2-71-9;g__WVYX01;s__WVYX01 sp011772755	76.9	0.2	d__Bacteria;p__Gemmatimonadota;c__Gemmatimonadetes;o__Gemmatimonadales;f__GWC2-71-9;g__;s__	taxonomic classification defined by topology and ANI	N/A	N/A	77.27
	M3-44_Bin_91	Group2	N	Yes	Gemmatimonadetes	d__Bacteria;p__Gemmatimonadota;c__Gemmatimonadetes;o__Gemmatimonadales;f__GWC2-71-9;g__WVYX01;s__	N	3.00859	4.1578	518	33186	7308	67.04	3164	3008586	2006	5808.1	Bohai Sea M3, China	Coastal Sediment	38.6675N/119.5475E	k__Bacteria (UID2495)	2993	147	91	42	97	8	0	0	0	72.36	4.65	50	d__Bacteria;p__Gemmatimonadota;c__Gemmatimonadetes;o__Gemmatimonadales;f__GWC2-71-9;g__WVYX01;s__	N/A	N/A	N/A	N/A	N/A	GCA_011772755.1	95	d__Bacteria;p__Gemmatimonadota;c__Gemmatimonadetes;o__Gemmatimonadales;f__GWC2-71-9;g__WVYX01;s__WVYX01 sp011772755	76.56	0.2	d__Bacteria;p__Gemmatimonadota;c__Gemmatimonadetes;o__Gemmatimonadales;f__GWC2-71-9;g__;s__	taxonomic classification defined by topology and ANI	N/A	N/A	66.15
	M3-44_Bin_93	Group2	Y	Yes	Gemmatimonadetes	d__Bacteria;p__Gemmatimonadota;c__Gemmatimonadetes;o__Gemmatimonadales;f__GWC2-71-9;g__WVYX01;s__	N	4.71493	4.76737	258	333932	55600	66.27	4408	4714932	2004	18274.9	Bohai Sea M3, China	Coastal Sediment	38.6675N/119.5475E	k__Bacteria (UID2495)	2993	147	91	1	140	6	0	0	0	98.9	4.95	0	d__Bacteria;p__Gemmatimonadota;c__Gemmatimonadetes;o__Gemmatimonadales;f__GWC2-71-9;g__WVYX01;s__	N/A	N/A	N/A	N/A	N/A	GCA_011772755.1	95	d__Bacteria;p__Gemmatimonadota;c__Gemmatimonadetes;o__Gemmatimonadales;f__GWC2-71-9;g__WVYX01;s__WVYX01 sp011772755	76.72	0.12	d__Bacteria;p__Gemmatimonadota;c__Gemmatimonadetes;o__Gemmatimonadales;f__GWC2-71-9;g__;s__	taxonomic classification defined by topology and ANI	N/A	N/A	90.83
	M3-44_Bin_97	Group2	Y	Yes	Gemmatimonadetes	d__Bacteria;p__Gemmatimonadota;c__Gemmatimonadetes;o__Gemmatimonadales;f__GWC2-71-9;g__WVYX01;s__	N	3.49645	4.05809	558	44062	8401	63.59	3784	3496449	2002	6266	Bohai Sea M3, China	Coastal Sediment	38.6675N/119.5475E	k__Bacteria (UID2495)	2993	147	91	15	129	3	0	0	0	86.16	3.3	0	d__Bacteria;p__Gemmatimonadota;c__Gemmatimonadetes;o__Gemmatimonadales;f__GWC2-71-9;g__WVYX01;s__	N/A	N/A	N/A	N/A	N/A	GCA_011772755.1	95	d__Bacteria;p__Gemmatimonadota;c__Gemmatimonadetes;o__Gemmatimonadales;f__GWC2-71-9;g__WVYX01;s__WVYX01 sp011772755	76.26	0.07	d__Bacteria;p__Gemmatimonadota;c__Gemmatimonadetes;o__Gemmatimonadales;f__GWC2-71-9;g__;s__	taxonomic classification defined by topology and ANI	N/A	N/A	78.74
	M8-12_Bin_104	Group4	N	Yes	Gemmatimonadetes	d__Bacteria;p__Gemmatimonadota;c__Gemmatimonadetes;o__Longimicrobiales;f__UBA6960;g__SZUA-318;s__	N	5.10944	6.26848	855	43303	7529	65.55	5064	5109439	2001	5976	Bohai Sea M8, China	Coastal Sediment	39.6928N/120.6606E	k__Bacteria (UID2495)	2993	147	91	36	102	9	0	0	0	81.51	9.34	22.22	d__Bacteria;p__Gemmatimonadota;c__Gemmatimonadetes;o__Longimicrobiales;f__UBA6960;g__SZUA-318;s__	N/A	N/A	N/A	N/A	N/A	GCA_003248075.1	95	d__Bacteria;p__Gemmatimonadota;c__Gemmatimonadetes;o__Longimicrobiales;f__UBA6960;g__SZUA-318;s__SZUA-318 sp003248075	76.56	0.17	d__Bacteria;p__Gemmatimonadota;c__Gemmatimonadetes;o__Longimicrobiales;f__UBA6960;g__;s__	taxonomic classification defined by topology and ANI	N/A	N/A	63.19
	M8-12_Bin_10	Group3	N	Yes	Gemmatimonadetes	d__Bacteria;p__Gemmatimonadota;c__Gemmatimonadetes;o__KS3-K002;f__JABDQB01;g__JABDQB01;s__	N	3.02173	3.98172	582	26247	5996	65.24	3180	3021730	2006	5192	Bohai Sea M8, China	Coastal Sediment	39.6928N/120.6606E	k__Bacteria (UID2495)	2993	147	91	28	110	9	0	0	0	75.89	1.1	88.89	d__Bacteria;p__Gemmatimonadota;c__Gemmatimonadetes;o__KS3-K002;f__JABDQB01;g__JABDQB01;s__	N/A	N/A	N/A	N/A	N/A	GCA_013042495.1	95	d__Bacteria;p__Gemmatimonadota;c__Gemmatimonadetes;o__KS3-K002;f__JABDQB01;g__JABDQB01;s__JABDQB01 sp013042495	79.8	0.48	d__Bacteria;p__Gemmatimonadota;c__Gemmatimonadetes;o__KS3-K002;f__JABDQB01;g__;s__	taxonomic classification defined by topology and ANI	N/A	N/A	66.81
	M8-12_Bin_114	Group3	N	Yes	Gemmatimonadetes	d__Bacteria;p__Gemmatimonadota;c__Gemmatimonadetes;o__KS3-K002;f__JABDQB01;g__;s__	N	3.22799	4.42736	662	24111	5528	64.38	3448	3227991	2000	4876.1	Bohai Sea M8, China	Coastal Sediment	39.6928N/120.6606E	k__Bacteria (UID2495)	2993	147	91	29	109	9	0	0	0	72.91	3.76	55.56	d__Bacteria;p__Gemmatimonadota;c__Gemmatimonadetes;o__KS3-K002;f__JABDQB01;g__;s__	N/A	N/A	N/A	N/A	N/A	GCA_013042495.1	95	d__Bacteria;p__Gemmatimonadota;c__Gemmatimonadetes;o__KS3-K002;f__JABDQB01;g__JABDQB01;s__JABDQB01 sp013042495	76.52	0.12	d__Bacteria;p__Gemmatimonadota;c__Gemmatimonadetes;o__KS3-K002;f__JABDQB01;g__;s__	taxonomic classification defined by topology and ANI	N/A	N/A	66.39
	M8-12_Bin_122	Group3	N	Yes	Gemmatimonadetes	d__Bacteria;p__Gemmatimonadota;c__Gemmatimonadetes;o__KS3-K002;f__JABDQB01;g__JABDQB01;s__	N	3.39626	3.47265	146	344945	63888	65.08	3229	3396256	2002	23262	Bohai Sea M8, China	Coastal Sediment	39.6928N/120.6606E	k__Bacteria (UID2495)	2993	147	91	2	142	3	0	0	0	97.8	3.3	0	d__Bacteria;p__Gemmatimonadota;c__Gemmatimonadetes;o__KS3-K002;f__JABDQB01;g__JABDQB01;s__	N/A	N/A	N/A	N/A	N/A	GCA_013042495.1	95	d__Bacteria;p__Gemmatimonadota;c__Gemmatimonadetes;o__KS3-K002;f__JABDQB01;g__JABDQB01;s__JABDQB01 sp013042495	79.69	0.62	d__Bacteria;p__Gemmatimonadota;c__Gemmatimonadetes;o__KS3-K002;f__JABDQB01;g__;s__	taxonomic classification defined by topology and ANI	N/A	N/A	91.88
	M8-12_Bin_146	Group2	N	Yes	Gemmatimonadetes	d__Bacteria;p__Gemmatimonadota;c__Gemmatimonadetes;o__Gemmatimonadales;f__GWC2-71-9;g__WVYX01;s__	N	4.61097	5.7265	373	129347	17788	59.28	4337	4610974	2007	12361.9	Bohai Sea M8, China	Coastal Sediment	39.6928N/120.6606E	k__Bacteria (UID2495)	2993	147	91	25	114	8	0	0	0	80.52	7.21	12.5	d__Bacteria;p__Gemmatimonadota;c__Gemmatimonadetes;o__Gemmatimonadales;f__GWC2-71-9;g__WVYX01;s__	N/A	N/A	N/A	N/A	N/A	GCA_011772755.1	95	d__Bacteria;p__Gemmatimonadota;c__Gemmatimonadetes;o__Gemmatimonadales;f__GWC2-71-9;g__WVYX01;s__WVYX01 sp011772755	76.5	0.06	d__Bacteria;p__Gemmatimonadota;c__Gemmatimonadetes;o__Gemmatimonadales;f__GWC2-71-9;g__;s__	taxonomic classification defined by topology and ANI	N/A	N/A	77.13
	M8-12_Bin_169	Group4	N	Yes	Gemmatimonadetes	d__Bacteria;p__Gemmatimonadota;c__Gemmatimonadetes;o__Longimicrobiales;f__UBA6960;g__;s__	N	3.73508	4.94712	589	37803	7868	68.4	3650	3735077	2001	6341.4	Bohai Sea M8, China	Coastal Sediment	39.6928N/120.6606E	k__Bacteria (UID2495)	2993	147	91	40	102	5	0	0	0	75.5	5.49	0	d__Bacteria;p__Gemmatimonadota;c__Gemmatimonadetes;o__Longimicrobiales;f__UBA6960;g__;s__	N/A	N/A	N/A	N/A	N/A	GCA_002346665.1	95	d__Bacteria;p__Gemmatimonadota;c__Gemmatimonadetes;o__Longimicrobiales;f__UBA6960;g__UBA2988;s__UBA2988 sp002346665	75.38	0.03	d__Bacteria;p__Gemmatimonadota;c__Gemmatimonadetes;o__Longimicrobiales;f__UBA6960;g__;s__	taxonomic classification defined by topology and ANI	N/A	N/A	65.69
	M8-12_Bin_188	Group3	N	Yes	Gemmatimonadetes	d__Bacteria;p__Gemmatimonadota;c__Gemmatimonadetes;o__KS3-K002;f__KS3-K002;g__;s__	N	1.68387	3.06381	511	14580	3290	63.94	1864	1683868	2004	3295.2	Bohai Sea M8, China	Coastal Sediment	39.6928N/120.6606E	k__Bacteria (UID2495)	2993	147	91	59	80	8	0	0	0	54.96	4.13	12.5	d__Bacteria;p__Gemmatimonadota;c__Gemmatimonadetes;o__KS3-K002;f__KS3-K002;g__;s__	N/A	N/A	N/A	N/A	N/A	GCA_011774835.1	95	d__Bacteria;p__Gemmatimonadota;c__Gemmatimonadetes;o__KS3-K002;f__KS3-K002;g__KS3-K002;s__KS3-K002 sp011774835	77.69	0.27	d__Bacteria;p__Gemmatimonadota;c__Gemmatimonadetes;o__KS3-K002;f__;g__;s__	taxonomic classification defined by topology and ANI	N/A	N/A	49.69
	M8-12_Bin_207	Group2	N	Yes	Gemmatimonadetes	d__Bacteria;p__Gemmatimonadota;c__Gemmatimonadetes;o__Gemmatimonadales;f__GWC2-71-9;g__WVYX01;s__	N	4.4034	5.82769	690	41593	7683	66.64	4333	4403401	2001	6381.7	Bohai Sea M8, China	Coastal Sediment	39.6928N/120.6606E	k__Bacteria (UID2495)	2993	147	91	28	116	3	0	0	0	75.56	1.75	33.33	d__Bacteria;p__Gemmatimonadota;c__Gemmatimonadetes;o__Gemmatimonadales;f__GWC2-71-9;g__WVYX01;s__	N/A	N/A	N/A	N/A	N/A	GCA_011772755.1	95	d__Bacteria;p__Gemmatimonadota;c__Gemmatimonadetes;o__Gemmatimonadales;f__GWC2-71-9;g__WVYX01;s__WVYX01 sp011772755	76.16	0.1	d__Bacteria;p__Gemmatimonadota;c__Gemmatimonadetes;o__Gemmatimonadales;f__GWC2-71-9;g__;s__	taxonomic classification defined by topology and ANI	N/A	N/A	68.73
	M8-12_Bin_208	Group3	Y	Yes	Gemmatimonadetes	d__Bacteria;p__Gemmatimonadota;c__Gemmatimonadetes;o__KS3-K002;f__JABDQB01;g__;s__	N	3.92633	4.17872	307	80307	19433	65.08	3637	3926329	2003	12789.3	Bohai Sea M8, China	Coastal Sediment	39.6928N/120.6606E	k__Bacteria (UID2495)	2993	147	91	6	139	2	0	0	0	93.96	2.2	0	d__Bacteria;p__Gemmatimonadota;c__Gemmatimonadetes;o__KS3-K002;f__JABDQB01;g__;s__	N/A	N/A	N/A	N/A	N/A	N/A	N/A	N/A	N/A	N/A	d__Bacteria;p__Gemmatimonadota;c__Gemmatimonadetes;o__KS3-K002;f__JABDQB01;g__;s__	taxonomic novelty determined using RED	N/A	N/A	91.13
	M8-12_Bin_220	Group3	Y	Yes	Gemmatimonadetes	d__Bacteria;p__Gemmatimonadota;c__Gemmatimonadetes;o__KS3-K002;f__JABDQB01;g__JABDQB01;s__	N	3.10795	3.21401	136	152103	37235	66.77	2896	3107948	2205	22852.6	Bohai Sea M8, China	Coastal Sediment	39.6928N/120.6606E	k__Bacteria (UID2495)	2993	147	91	3	141	3	0	0	0	96.7	3.3	0	d__Bacteria;p__Gemmatimonadota;c__Gemmatimonadetes;o__KS3-K002;f__JABDQB01;g__JABDQB01;s__	N/A	N/A	N/A	N/A	N/A	GCA_013042495.1	95	d__Bacteria;p__Gemmatimonadota;c__Gemmatimonadetes;o__KS3-K002;f__JABDQB01;g__JABDQB01;s__JABDQB01 sp013042495	77.76	0.28	d__Bacteria;p__Gemmatimonadota;c__Gemmatimonadetes;o__KS3-K002;f__JABDQB01;g__;s__	taxonomic classification defined by topology and ANI	N/A	N/A	91.05
	M8-12_Bin_227	Group3	Y	Yes	Gemmatimonadetes	d__Bacteria;p__Gemmatimonadota;c__Gemmatimonadetes;o__KS3-K002;f__JABDQB01;g__JABDQB01;s__	N	2.9005	2.99949	333	86359	12906	65.82	2944	2900504	2066	8710.2	Bohai Sea M8, China	Coastal Sediment	39.6928N/120.6606E	k__Bacteria (UID2495)	2993	147	91	3	139	5	0	0	0	96.7	4.95	20	d__Bacteria;p__Gemmatimonadota;c__Gemmatimonadetes;o__KS3-K002;f__JABDQB01;g__JABDQB01;s__	N/A	N/A	N/A	N/A	N/A	GCA_013042495.1	95	d__Bacteria;p__Gemmatimonadota;c__Gemmatimonadetes;o__KS3-K002;f__JABDQB01;g__JABDQB01;s__JABDQB01 sp013042495	79.74	0.51	d__Bacteria;p__Gemmatimonadota;c__Gemmatimonadetes;o__KS3-K002;f__JABDQB01;g__;s__	taxonomic classification defined by topology and ANI	N/A	N/A	92.54
	M8-12_Bin_231	Group2	N	Yes	Gemmatimonadetes	d__Bacteria;p__Gemmatimonadota;c__Gemmatimonadetes;o__Gemmatimonadales;f__GWC2-71-9;g__WVYX01;s__	N	3.05797	4.78032	778	21036	4138	66.25	3314	3057968	2000	3930.6	Bohai Sea M8, China	Coastal Sediment	39.6928N/120.6606E	k__Bacteria (UID2495)	2993	147	91	50	95	2	0	0	0	63.97	1.2	50	d__Bacteria;p__Gemmatimonadota;c__Gemmatimonadetes;o__Gemmatimonadales;f__GWC2-71-9;g__WVYX01;s__	N/A	N/A	N/A	N/A	N/A	GCA_011772755.1	95	d__Bacteria;p__Gemmatimonadota;c__Gemmatimonadetes;o__Gemmatimonadales;f__GWC2-71-9;g__WVYX01;s__WVYX01 sp011772755	76.58	0.11	d__Bacteria;p__Gemmatimonadota;c__Gemmatimonadetes;o__Gemmatimonadales;f__GWC2-71-9;g__;s__	taxonomic classification defined by topology and ANI	N/A	N/A	53.07
	M8-12_Bin_244	Group2	Y	Yes	Gemmatimonadetes	d__Bacteria;p__Gemmatimonadota;c__Gemmatimonadetes;o__Gemmatimonadales;f__GWC2-71-9;g__WVYX01;s__	Y	3.24003	3.3506	94	179078	97009	66.17	3012	3240027	2264	34468.4	Bohai Sea M8, China	Coastal Sediment	39.6928N/120.6606E	k__Bacteria (UID2495)	2993	147	91	3	141	3	0	0	0	96.7	2.26	33.33	d__Bacteria;p__Gemmatimonadota;c__Gemmatimonadetes;o__Gemmatimonadales;f__GWC2-71-9;g__WVYX01;s__	N/A	N/A	N/A	N/A	N/A	GCA_011772755.1	95	d__Bacteria;p__Gemmatimonadota;c__Gemmatimonadetes;o__Gemmatimonadales;f__GWC2-71-9;g__WVYX01;s__WVYX01 sp011772755	76.68	0.16	d__Bacteria;p__Gemmatimonadota;c__Gemmatimonadetes;o__Gemmatimonadales;f__GWC2-71-9;g__;s__	taxonomic classification defined by topology and ANI	N/A	N/A	93.33
	M8-12_Bin_273	Group2	Y	Yes	Gemmatimonadetes	d__Bacteria;p__Gemmatimonadota;c__Gemmatimonadetes;o__Gemmatimonadales;f__GWC2-71-9;g__WVYX01;s__	N	3.44463	3.68764	65	290985	122623	67.47	3145	3444629	2663	52994.3	Bohai Sea M8, China	Coastal Sediment	39.6928N/120.6606E	k__Bacteria (UID2495)	2993	147	91	22	122	3	0	0	0	93.41	3.3	0	d__Bacteria;p__Gemmatimonadota;c__Gemmatimonadetes;o__Gemmatimonadales;f__GWC2-71-9;g__WVYX01;s__	N/A	N/A	N/A	N/A	N/A	GCA_011772755.1	95	d__Bacteria;p__Gemmatimonadota;c__Gemmatimonadetes;o__Gemmatimonadales;f__GWC2-71-9;g__WVYX01;s__WVYX01 sp011772755	77.03	0.21	d__Bacteria;p__Gemmatimonadota;c__Gemmatimonadetes;o__Gemmatimonadales;f__GWC2-71-9;g__;s__	taxonomic classification defined by topology and ANI	N/A	N/A	86.6
	M8-12_Bin_274	Group3	N	Yes	Gemmatimonadetes	d__Bacteria;p__Gemmatimonadota;c__Gemmatimonadetes;o__KS3-K002;f__JABDQB01;g__;s__	N	2.6383	3.36647	427	49486	7933	66.12	2878	2638300	2001	6178.7	Bohai Sea M8, China	Coastal Sediment	39.6928N/120.6606E	k__Bacteria (UID2495)	2993	147	91	24	118	5	0	0	0	78.37	3.91	40	d__Bacteria;p__Gemmatimonadota;c__Gemmatimonadetes;o__KS3-K002;f__JABDQB01;g__;s__	N/A	N/A	N/A	N/A	N/A	N/A	N/A	N/A	N/A	N/A	d__Bacteria;p__Gemmatimonadota;c__Gemmatimonadetes;o__KS3-K002;f__JABDQB01;g__;s__	taxonomic novelty determined using RED	N/A	N/A	72.58
	M8-12_Bin_284	Group4	N	Yes	Gemmatimonadetes	d__Bacteria;p__Gemmatimonadota;c__Gemmatimonadetes;o__Longimicrobiales;f__UBA6960;g__;s__	N	3.03063	4.59674	722	20227	4685	63.19	3305	3030628	2000	4197.5	Bohai Sea M8, China	Coastal Sediment	39.6928N/120.6606E	k__Bacteria (UID2495)	2993	147	91	48	92	6	1	0	0	65.93	7.14	0	d__Bacteria;p__Gemmatimonadota;c__Gemmatimonadetes;o__Longimicrobiales;f__UBA6960;g__;s__	N/A	N/A	N/A	N/A	N/A	N/A	N/A	N/A	N/A	N/A	d__Bacteria;p__Gemmatimonadota;c__Gemmatimonadetes;o__Longimicrobiales;f__UBA6960;g__;s__	taxonomic novelty determined using RED	N/A	N/A	53.98
	M8-12_Bin_28	Group4	N	Yes	Gemmatimonadetes	d__Bacteria;p__Gemmatimonadota;c__Gemmatimonadetes;o__Longimicrobiales;f__UBA6960;g__;s__	N	2.16554	3.67352	611	10113	3597	65.46	2317	2165542	2000	3544.3	Bohai Sea M8, China	Coastal Sediment	39.6928N/120.6606E	k__Bacteria (UID2495)	2993	147	91	61	85	1	0	0	0	58.95	1.1	0	d__Bacteria;p__Gemmatimonadota;c__Gemmatimonadetes;o__Longimicrobiales;f__UBA6960;g__;s__	N/A	N/A	N/A	N/A	N/A	N/A	N/A	N/A	N/A	N/A	d__Bacteria;p__Gemmatimonadota;c__Gemmatimonadetes;o__Longimicrobiales;f__UBA6960;g__;s__	taxonomic classification fully defined by topology	N/A	N/A	53.13
	M8-12_Bin_307	Group4	Y	Yes	Gemmatimonadetes	d__Bacteria;p__Gemmatimonadota;c__Gemmatimonadetes;o__Longimicrobiales;f__UBA6960;g__;s__	N	3.45928	3.51732	335	49169	14857	66.91	3246	3459281	2005	10326.2	Bohai Sea M8, China	Coastal Sediment	39.6928N/120.6606E	k__Bacteria (UID2495)	2993	147	91	2	143	2	0	0	0	98.35	2.2	0	d__Bacteria;p__Gemmatimonadota;c__Gemmatimonadetes;o__Longimicrobiales;f__UBA6960;g__;s__	N/A	N/A	N/A	N/A	N/A	N/A	N/A	N/A	N/A	N/A	d__Bacteria;p__Gemmatimonadota;c__Gemmatimonadetes;o__Longimicrobiales;f__UBA6960;g__;s__	taxonomic classification fully defined by topology	N/A	N/A	83.58
	M8-12_Bin_30	Group2	N	Yes	Gemmatimonadetes	d__Bacteria;p__Gemmatimonadota;c__Gemmatimonadetes;o__Gemmatimonadales;f__GWC2-71-9;g__WVYX01;s__	N	2.52215	4.25966	536	25455	5422	65.72	2735	2522146	2001	4705.5	Bohai Sea M8, China	Coastal Sediment	39.6928N/120.6606E	k__Bacteria (UID2495)	2993	147	91	46	94	6	1	0	0	59.21	3.7	22.22	d__Bacteria;p__Gemmatimonadota;c__Gemmatimonadetes;o__Gemmatimonadales;f__GWC2-71-9;g__WVYX01;s__	N/A	N/A	N/A	N/A	N/A	GCA_011772755.1	95	d__Bacteria;p__Gemmatimonadota;c__Gemmatimonadetes;o__Gemmatimonadales;f__GWC2-71-9;g__WVYX01;s__WVYX01 sp011772755	75.72	0.08	d__Bacteria;p__Gemmatimonadota;c__Gemmatimonadetes;o__Gemmatimonadales;f__GWC2-71-9;g__;s__	taxonomic classification defined by topology and ANI	N/A	N/A	55.83
	M8-12_Bin_314	Group3	N	Yes	Gemmatimonadetes	d__Bacteria;p__Gemmatimonadota;c__Gemmatimonadetes;o__KS3-K002;f__JABDQB01;g__JABDQB01;s__	N	2.00009	3.19299	471	15902	4554	64.85	2206	2000087	2002	4246.5	Bohai Sea M8, China	Coastal Sediment	39.6928N/120.6606E	k__Bacteria (UID2495)	2993	147	91	45	100	2	0	0	0	62.64	2.2	0	d__Bacteria;p__Gemmatimonadota;c__Gemmatimonadetes;o__KS3-K002;f__JABDQB01;g__JABDQB01;s__	N/A	N/A	N/A	N/A	N/A	GCA_013042495.1	95	d__Bacteria;p__Gemmatimonadota;c__Gemmatimonadetes;o__KS3-K002;f__JABDQB01;g__JABDQB01;s__JABDQB01 sp013042495	79.41	0.43	d__Bacteria;p__Gemmatimonadota;c__Gemmatimonadetes;o__KS3-K002;f__JABDQB01;g__;s__	taxonomic classification defined by topology and ANI	N/A	N/A	56.36
	M8-12_Bin_64	Group4	Y	Yes	Gemmatimonadetes	d__Bacteria;p__Gemmatimonadota;c__Gemmatimonadetes;o__Longimicrobiales;f__UBA6960;g__;s__	N	5.68039	6.01036	641	90818	13525	67.79	5195	5680389	2010	8861.8	Bohai Sea M8, China	Coastal Sediment	39.6928N/120.6606E	k__Bacteria (UID2495)	2993	147	91	6	135	6	0	0	0	94.51	3.56	0	d__Bacteria;p__Gemmatimonadota;c__Gemmatimonadetes;o__Longimicrobiales;f__UBA6960;g__;s__	N/A	N/A	N/A	N/A	N/A	N/A	N/A	N/A	N/A	N/A	d__Bacteria;p__Gemmatimonadota;c__Gemmatimonadetes;o__Longimicrobiales;f__UBA6960;g__;s__	taxonomic classification fully defined by topology	N/A	N/A	82.71
	M8-12_Bin_65	Group3	N	Yes	Gemmatimonadetes	d__Bacteria;p__Gemmatimonadota;c__Gemmatimonadetes;o__KS3-K002;f__KS3-K002;g__KS3-K002;s__	N	3.61094	5.12918	771	20190	5435	64.18	3778	3610941	2005	4683.5	Bohai Sea M8, China	Coastal Sediment	39.6928N/120.6606E	k__Bacteria (UID2495)	2993	147	91	43	100	4	0	0	0	70.4	4.4	0	d__Bacteria;p__Gemmatimonadota;c__Gemmatimonadetes;o__KS3-K002;f__KS3-K002;g__KS3-K002;s__	N/A	N/A	N/A	N/A	N/A	GCA_011774835.1	95	d__Bacteria;p__Gemmatimonadota;c__Gemmatimonadetes;o__KS3-K002;f__KS3-K002;g__KS3-K002;s__KS3-K002 sp011774835	77.42	0.25	d__Bacteria;p__Gemmatimonadota;c__Gemmatimonadetes;o__KS3-K002;f__;g__;s__	taxonomic classification defined by topology and ANI	N/A	N/A	60.97
	M8-12_Bin_82	Group4	N	Yes	Gemmatimonadetes	d__Bacteria;p__Gemmatimonadota;c__Gemmatimonadetes;o__Longimicrobiales;f__UBA6960;g__SZUA-318;s__	N	3.3315	4.84935	833	18513	4309	68.34	3496	3331503	2003	3999.4	Bohai Sea M8, China	Coastal Sediment	39.6928N/120.6606E	k__Bacteria (UID2495)	2993	147	91	45	99	3	0	0	0	68.7	2.26	33.33	d__Bacteria;p__Gemmatimonadota;c__Gemmatimonadetes;o__Longimicrobiales;f__UBA6960;g__SZUA-318;s__	N/A	N/A	N/A	N/A	N/A	GCA_003248075.1	95	d__Bacteria;p__Gemmatimonadota;c__Gemmatimonadetes;o__Longimicrobiales;f__UBA6960;g__SZUA-318;s__SZUA-318 sp003248075	77.08	0.28	d__Bacteria;p__Gemmatimonadota;c__Gemmatimonadetes;o__Longimicrobiales;f__UBA6960;g__;s__	taxonomic classification defined by topology and ANI	N/A	N/A	59.16
	M8-12_Bin_85	Group4	N	Yes	Gemmatimonadetes	d__Bacteria;p__Gemmatimonadota;c__Gemmatimonadetes;o__Longimicrobiales;f__UBA6960;g__JABDNZ01;s__	N	5.46799	5.52881	570	88167	15119	63.04	4971	5467989	2016	9593	Bohai Sea M8, China	Coastal Sediment	39.6928N/120.6606E	k__Bacteria (UID2495)	2993	147	91	1	141	5	0	0	0	98.9	5.49	0	d__Bacteria;p__Gemmatimonadota;c__Gemmatimonadetes;o__Longimicrobiales;f__UBA6960;g__JABDNZ01;s__	N/A	N/A	N/A	N/A	N/A	GCA_013043565.1	95	d__Bacteria;p__Gemmatimonadota;c__Gemmatimonadetes;o__Longimicrobiales;f__UBA6960;g__JABDNZ01;s__JABDNZ01 sp013043565	77.1	0.18	d__Bacteria;p__Gemmatimonadota;c__Gemmatimonadetes;o__Longimicrobiales;f__UBA6960;g__;s__	taxonomic classification defined by topology and ANI	N/A	N/A	89.5
	M8-2_Bin_113	Group3	Y	Yes	Gemmatimonadetes	d__Bacteria;p__Gemmatimonadota;c__Gemmatimonadetes;o__KS3-K002;f__JABDQB01;g__JABDQB01;s__	N	3.27244	3.38412	268	79722	20182	65.06	3161	3272444	2001	12210.6	Bohai Sea M8, China	Coastal Sediment	39.6928N/120.6606E	k__Bacteria (UID2495)	2993	147	91	3	140	4	0	0	0	96.7	3.4	0	d__Bacteria;p__Gemmatimonadota;c__Gemmatimonadetes;o__KS3-K002;f__JABDQB01;g__JABDQB01;s__	N/A	N/A	N/A	N/A	N/A	GCA_013042495.1	95	d__Bacteria;p__Gemmatimonadota;c__Gemmatimonadetes;o__KS3-K002;f__JABDQB01;g__JABDQB01;s__JABDQB01 sp013042495	79.61	0.57	d__Bacteria;p__Gemmatimonadota;c__Gemmatimonadetes;o__KS3-K002;f__JABDQB01;g__;s__	taxonomic classification defined by topology and ANI	N/A	N/A	90.07
	M8-2_Bin_12	Group4	N	Yes	Gemmatimonadetes	d__Bacteria;p__Gemmatimonadota;c__Gemmatimonadetes;o__Longimicrobiales;f__UBA6960;g__UBA2589;s__	N	2.88819	4.15388	213	45043	16160	64.38	2705	2888190	2801	13559.6	Bohai Sea M8, China	Coastal Sediment	39.6928N/120.6606E	k__Bacteria (UID2495)	2993	147	91	46	95	5	1	0	0	69.53	7.69	0	d__Bacteria;p__Gemmatimonadota;c__Gemmatimonadetes;o__Longimicrobiales;f__UBA6960;g__UBA2589;s__	N/A	N/A	N/A	N/A	N/A	N/A	N/A	N/A	N/A	N/A	d__Bacteria;p__Gemmatimonadota;c__Gemmatimonadetes;o__Longimicrobiales;f__UBA6960;g__UBA2589;s__	ANI	N/A	GCA_002390225.1, s__UBA2589 sp002390225, 95.0, 76.84, 0.16; GCA_013002885.1, s__UBA2589 sp013002885, 95.0, 76.79, 0.14; GCA_002348465.1, s__UBA2589 sp002348465, 95.0, 76.11, 0.05; GCA_002500925.1, s__UBA2589 sp002500925, 95.0, 75.84, 0.04; GCA_002348265.1, s__UBA2589 sp002348265, 95.0, 75.47, 0.03	62.02
	M8-2_Bin_173	Group4	N	Yes	Gemmatimonadetes	d__Bacteria;p__Gemmatimonadota;c__Gemmatimonadetes;o__Longimicrobiales;f__UBA6960;g__UBA2589;s__	N	4.32614	4.7467	170	210292	55006	63.98	3884	4326138	2001	25447.9	Bohai Sea M8, China	Coastal Sediment	39.6928N/120.6606E	k__Bacteria (UID2495)	2993	147	91	10	133	3	1	0	0	91.14	5.49	0	d__Bacteria;p__Gemmatimonadota;c__Gemmatimonadetes;o__Longimicrobiales;f__UBA6960;g__UBA2589;s__	N/A	N/A	N/A	N/A	N/A	N/A	N/A	N/A	N/A	N/A	d__Bacteria;p__Gemmatimonadota;c__Gemmatimonadetes;o__Longimicrobiales;f__UBA6960;g__UBA2589;s__	ANI	N/A	GCA_002390225.1, s__UBA2589 sp002390225, 95.0, 77.08, 0.22; GCA_013002885.1, s__UBA2589 sp013002885, 95.0, 76.94, 0.17; GCA_002348465.1, s__UBA2589 sp002348465, 95.0, 76.43, 0.05; GCA_002348265.1, s__UBA2589 sp002348265, 95.0, 76.23, 0.04; GCA_002500925.1, s__UBA2589 sp002500925, 95.0, 76.11, 0.05	83.64
	M8-2_Bin_192	Group3	Y	Yes	Gemmatimonadetes	d__Bacteria;p__Gemmatimonadota;c__Gemmatimonadetes;o__KS3-K002;f__JABDQB01;g__;s__	Y	3.70313	4.08463	395	79714	14360	65.09	3518	3703130	2012	9375	Bohai Sea M8, China	Coastal Sediment	39.6928N/120.6606E	k__Bacteria (UID2495)	2993	147	91	9	133	5	0	0	0	90.66	3.95	20	d__Bacteria;p__Gemmatimonadota;c__Gemmatimonadetes;o__KS3-K002;f__JABDQB01;g__;s__	N/A	N/A	N/A	N/A	N/A	N/A	N/A	N/A	N/A	N/A	d__Bacteria;p__Gemmatimonadota;c__Gemmatimonadetes;o__KS3-K002;f__JABDQB01;g__;s__	taxonomic novelty determined using RED	N/A	N/A	86.86
	M8-2_Bin_195	Group3	Y	Yes	Gemmatimonadetes	d__Bacteria;p__Gemmatimonadota;c__Gemmatimonadetes;o__KS3-K002;f__JABDQB01;g__JABDQB01;s__	Y	3.30199	3.47578	310	96425	19061	65.74	3246	3301995	2003	10651.6	Bohai Sea M8, China	Coastal Sediment	39.6928N/120.6606E	k__Bacteria (UID2495)	2993	147	91	15	129	3	0	0	0	95	3.3	0	d__Bacteria;p__Gemmatimonadota;c__Gemmatimonadetes;o__KS3-K002;f__JABDQB01;g__JABDQB01;s__	N/A	N/A	N/A	N/A	N/A	GCA_013042495.1	95	d__Bacteria;p__Gemmatimonadota;c__Gemmatimonadetes;o__KS3-K002;f__JABDQB01;g__JABDQB01;s__JABDQB01 sp013042495	79.59	0.56	d__Bacteria;p__Gemmatimonadota;c__Gemmatimonadetes;o__KS3-K002;f__JABDQB01;g__;s__	taxonomic classification defined by topology and ANI	N/A	N/A	88.07
	M8-2_Bin_230	Group4	Y	Yes	Gemmatimonadetes	d__Bacteria;p__Gemmatimonadota;c__Gemmatimonadetes;o__Longimicrobiales;f__UBA6960;g__;s__	N	3.75534	3.92817	209	110214	32622	65.45	3293	3755335	2043	17968.1	Bohai Sea M8, China	Coastal Sediment	39.6928N/120.6606E	k__Bacteria (UID2495)	2993	147	91	5	139	3	0	0	0	95.6	3.3	0	d__Bacteria;p__Gemmatimonadota;c__Gemmatimonadetes;o__Longimicrobiales;f__UBA6960;g__;s__	N/A	N/A	N/A	N/A	N/A	N/A	N/A	N/A	N/A	N/A	d__Bacteria;p__Gemmatimonadota;c__Gemmatimonadetes;o__Longimicrobiales;f__UBA6960;g__;s__	taxonomic classification fully defined by topology	N/A	N/A	89.3
	M8-2_Bin_233	Group4	N	Yes	Gemmatimonadetes	d__Bacteria;p__Gemmatimonadota;c__Gemmatimonadetes;o__Longimicrobiales;f__UBA6960;g__;s__	N	2.645	4.21245	673	16551	4096	62.48	2891	2644995	2006	3930.2	Bohai Sea M8, China	Coastal Sediment	39.6928N/120.6606E	k__Bacteria (UID2495)	2993	147	91	45	96	6	0	0	0	62.79	3.05	0	d__Bacteria;p__Gemmatimonadota;c__Gemmatimonadetes;o__Longimicrobiales;f__UBA6960;g__;s__	N/A	N/A	N/A	N/A	N/A	N/A	N/A	N/A	N/A	N/A	d__Bacteria;p__Gemmatimonadota;c__Gemmatimonadetes;o__Longimicrobiales;f__UBA6960;g__;s__	taxonomic classification fully defined by topology	N/A	N/A	50.31
	M8-2_Bin_246	Group3	N	Yes	Gemmatimonadetes	d__Bacteria;p__Gemmatimonadota;c__Gemmatimonadetes;o__KS3-K002;f__JABDQB01;g__JABDQB01;s__	N	2.13601	2.67738	505	15897	4762	66.94	2335	2136012	2005	4229.7	Bohai Sea M8, China	Coastal Sediment	39.6928N/120.6606E	k__Bacteria (UID2495)	2993	147	91	32	112	3	0	0	0	79.78	2.75	33.33	d__Bacteria;p__Gemmatimonadota;c__Gemmatimonadetes;o__KS3-K002;f__JABDQB01;g__JABDQB01;s__	N/A	N/A	N/A	N/A	N/A	GCA_013042495.1	95	d__Bacteria;p__Gemmatimonadota;c__Gemmatimonadetes;o__KS3-K002;f__JABDQB01;g__JABDQB01;s__JABDQB01 sp013042495	77.75	0.21	d__Bacteria;p__Gemmatimonadota;c__Gemmatimonadetes;o__KS3-K002;f__JABDQB01;g__;s__	taxonomic classification defined by topology and ANI	N/A	N/A	67.7
	M8-2_Bin_261	Group2	Y	Yes	Gemmatimonadetes	d__Bacteria;p__Gemmatimonadota;c__Gemmatimonadetes;o__Gemmatimonadales;f__GWC2-71-9;g__WVYX01;s__	N	2.80665	3.50481	493	31953	6765	66.2	2937	2806653	2006	5693	Bohai Sea M8, China	Coastal Sediment	39.6928N/120.6606E	k__Bacteria (UID2495)	2993	147	91	28	115	4	0	0	0	80.08	3.85	25	d__Bacteria;p__Gemmatimonadota;c__Gemmatimonadetes;o__Gemmatimonadales;f__GWC2-71-9;g__WVYX01;s__	N/A	N/A	N/A	N/A	N/A	GCA_011772755.1	95	d__Bacteria;p__Gemmatimonadota;c__Gemmatimonadetes;o__Gemmatimonadales;f__GWC2-71-9;g__WVYX01;s__WVYX01 sp011772755	76.44	0.17	d__Bacteria;p__Gemmatimonadota;c__Gemmatimonadetes;o__Gemmatimonadales;f__GWC2-71-9;g__;s__	taxonomic classification defined by topology and ANI	N/A	N/A	73.4
	M8-2_Bin_287	Group2	Y	Yes	Gemmatimonadetes	d__Bacteria;p__Gemmatimonadota;c__Gemmatimonadetes;o__Gemmatimonadales;f__GWC2-71-9;g__WVYX01;s__	N	3.14634	3.56808	429	52637	9716	67.49	3205	3146336	2011	7334.1	Bohai Sea M8, China	Coastal Sediment	39.6928N/120.6606E	k__Bacteria (UID2495)	2993	147	91	14	128	5	0	0	0	88.18	3.46	20	d__Bacteria;p__Gemmatimonadota;c__Gemmatimonadetes;o__Gemmatimonadales;f__GWC2-71-9;g__WVYX01;s__	N/A	N/A	N/A	N/A	N/A	GCA_011772755.1	95	d__Bacteria;p__Gemmatimonadota;c__Gemmatimonadetes;o__Gemmatimonadales;f__GWC2-71-9;g__WVYX01;s__WVYX01 sp011772755	77	0.21	d__Bacteria;p__Gemmatimonadota;c__Gemmatimonadetes;o__Gemmatimonadales;f__GWC2-71-9;g__;s__	taxonomic classification defined by topology and ANI	N/A	N/A	78.76
	M8-2_Bin_2	Group3	N	Yes	Gemmatimonadetes	d__Bacteria;p__Gemmatimonadota;c__Gemmatimonadetes;o__KS3-K002;f__;g__;s__	N	2.39214	3.44044	707	20327	3317	65.72	2689	2392137	2000	3383.5	Bohai Sea M8, China	Coastal Sediment	39.6928N/120.6606E	k__Bacteria (UID2495)	2993	147	91	43	102	2	0	0	0	69.53	1.65	50	d__Bacteria;p__Gemmatimonadota;c__Gemmatimonadetes;o__KS3-K002;f__;g__;s__	N/A	N/A	N/A	N/A	N/A	N/A	N/A	N/A	N/A	N/A	d__Bacteria;p__Gemmatimonadota;c__Gemmatimonadetes;o__KS3-K002;f__;g__;s__	taxonomic novelty determined using RED	N/A	N/A	57.57
	M8-2_Bin_65	Group3	N	Yes	Gemmatimonadetes	d__Bacteria;p__Gemmatimonadota;c__Gemmatimonadetes;o__KS3-K002;f__;g__;s__	N	3.57975	3.79452	368	104749	17597	65.12	3536	3579746	2002	9727.6	Bohai Sea M8, China	Coastal Sediment	39.6928N/120.6606E	k__Bacteria (UID2495)	2993	147	91	7	131	9	0	0	0	94.34	6.31	33.33	d__Bacteria;p__Gemmatimonadota;c__Gemmatimonadetes;o__KS3-K002;f__;g__;s__	N/A	N/A	N/A	N/A	N/A	N/A	N/A	N/A	N/A	N/A	d__Bacteria;p__Gemmatimonadota;c__Gemmatimonadetes;o__KS3-K002;f__;g__;s__	taxonomic novelty determined using RED	N/A	N/A	80.98
	M8-32_Bin_109	Group2	N	Yes	Gemmatimonadetes	d__Bacteria;p__Gemmatimonadota;c__Gemmatimonadetes;o__Gemmatimonadales;f__GWC2-71-9;g__WVYX01;s__	N	2.11136	3.76021	600	14077	3528	65.39	2404	2111358	2001	3518.9	Bohai Sea M8, China	Coastal Sediment	39.6928N/120.6606E	k__Bacteria (UID2495)	2993	147	91	55	91	1	0	0	0	56.15	1.1	0	d__Bacteria;p__Gemmatimonadota;c__Gemmatimonadetes;o__Gemmatimonadales;f__GWC2-71-9;g__WVYX01;s__	N/A	N/A	N/A	N/A	N/A	GCA_011772755.1	95	d__Bacteria;p__Gemmatimonadota;c__Gemmatimonadetes;o__Gemmatimonadales;f__GWC2-71-9;g__WVYX01;s__WVYX01 sp011772755	77.06	0.15	d__Bacteria;p__Gemmatimonadota;c__Gemmatimonadetes;o__Gemmatimonadales;f__GWC2-71-9;g__;s__	taxonomic classification defined by topology and ANI	N/A	N/A	51.76
	M8-32_Bin_122	Group4	Y	Yes	Gemmatimonadetes	d__Bacteria;p__Gemmatimonadota;c__Gemmatimonadetes;o__Longimicrobiales;f__UBA6960;g__;s__	Y	3.68329	3.76615	95	255455	82792	66.91	3197	3683290	2028	38771.5	Bohai Sea M8, China	Coastal Sediment	39.6928N/120.6606E	k__Bacteria (UID2495)	2993	147	91	2	142	3	0	0	0	97.8	3.3	0	d__Bacteria;p__Gemmatimonadota;c__Gemmatimonadetes;o__Longimicrobiales;f__UBA6960;g__;s__	N/A	N/A	N/A	N/A	N/A	N/A	N/A	N/A	N/A	N/A	d__Bacteria;p__Gemmatimonadota;c__Gemmatimonadetes;o__Longimicrobiales;f__UBA6960;g__;s__	taxonomic classification fully defined by topology	N/A	N/A	90.55
	M8-32_Bin_127	Group3	N	Yes	Gemmatimonadetes	d__Bacteria;p__Gemmatimonadota;c__Gemmatimonadetes;o__KS3-K002;f__KS3-K002;g__KS3-K002;s__	N	3.0609	4.40607	528	26346	6731	63.27	3123	3060899	2000	5797.2	Bohai Sea M8, China	Coastal Sediment	39.6928N/120.6606E	k__Bacteria (UID2495)	2993	147	91	50	95	2	0	0	0	69.47	2.2	0	d__Bacteria;p__Gemmatimonadota;c__Gemmatimonadetes;o__KS3-K002;f__KS3-K002;g__KS3-K002;s__	N/A	N/A	N/A	N/A	N/A	GCA_011774835.1	95	d__Bacteria;p__Gemmatimonadota;c__Gemmatimonadetes;o__KS3-K002;f__KS3-K002;g__KS3-K002;s__KS3-K002 sp011774835	76.87	0.15	d__Bacteria;p__Gemmatimonadota;c__Gemmatimonadetes;o__KS3-K002;f__;g__;s__	taxonomic classification defined by topology and ANI	N/A	N/A	55.45
	M8-32_Bin_135	Group4	Y	Yes	Gemmatimonadetes	d__Bacteria;p__Gemmatimonadota;c__Gemmatimonadetes;o__Longimicrobiales;f__UBA6960;g__;s__	N	5.72351	6.09144	391	138392	26448	67.83	5020	5723515	2005	14638.1	Bohai Sea M8, China	Coastal Sediment	39.6928N/120.6606E	k__Bacteria (UID2495)	2993	147	91	8	136	3	0	0	0	93.96	3.3	0	d__Bacteria;p__Gemmatimonadota;c__Gemmatimonadetes;o__Longimicrobiales;f__UBA6960;g__;s__	N/A	N/A	N/A	N/A	N/A	N/A	N/A	N/A	N/A	N/A	d__Bacteria;p__Gemmatimonadota;c__Gemmatimonadetes;o__Longimicrobiales;f__UBA6960;g__;s__	taxonomic classification fully defined by topology	N/A	N/A	86.58
	M8-32_Bin_138	Group2	N	Yes	Gemmatimonadetes	d__Bacteria;p__Gemmatimonadota;c__Gemmatimonadetes;o__Gemmatimonadales;f__GWC2-71-9;g__;s__	N	4.76054	5.25504	554	83639	13007	66.31	4559	4760537	2002	8593	Bohai Sea M8, China	Coastal Sediment	39.6928N/120.6606E	k__Bacteria (UID2495)	2993	147	91	11	131	4	1	0	0	90.59	5.59	14.29	d__Bacteria;p__Gemmatimonadota;c__Gemmatimonadetes;o__Gemmatimonadales;f__GWC2-71-9;g__;s__	N/A	N/A	N/A	N/A	N/A	N/A	N/A	N/A	N/A	N/A	d__Bacteria;p__Gemmatimonadota;c__Gemmatimonadetes;o__Gemmatimonadales;f__GWC2-71-9;g__;s__	taxonomic classification fully defined by topology	N/A	N/A	86.42
	M8-32_Bin_152	Group3	N	Yes	Gemmatimonadetes	d__Bacteria;p__Gemmatimonadota;c__Gemmatimonadetes;o__KS3-K002;f__KS3-K002;g__;s__	N	4.70411	6.32188	887	25468	6358	63.04	4671	4704109	2004	5303.4	Bohai Sea M8, China	Coastal Sediment	39.6928N/120.6606E	k__Bacteria (UID2495)	2993	147	91	45	97	5	0	0	0	74.41	4.4	20	d__Bacteria;p__Gemmatimonadota;c__Gemmatimonadetes;o__KS3-K002;f__KS3-K002;g__;s__	N/A	N/A	N/A	N/A	N/A	GCA_011774835.1	95	d__Bacteria;p__Gemmatimonadota;c__Gemmatimonadetes;o__KS3-K002;f__KS3-K002;g__KS3-K002;s__KS3-K002 sp011774835	76.79	0.14	d__Bacteria;p__Gemmatimonadota;c__Gemmatimonadetes;o__KS3-K002;f__;g__;s__	taxonomic classification defined by topology and ANI	N/A	N/A	59.2
	M8-32_Bin_158	Group3	N	Yes	Gemmatimonadetes	d__Bacteria;p__Gemmatimonadota;c__Gemmatimonadetes;o__KS3-K002;f__KS3-K002;g__KS3-K002;s__	N	2.89119	4.78992	680	20286	4634	64.19	3076	2891193	2001	4251.8	Bohai Sea M8, China	Coastal Sediment	39.6928N/120.6606E	k__Bacteria (UID2495)	2993	147	91	48	92	7	0	0	0	60.36	0.94	28.57	d__Bacteria;p__Gemmatimonadota;c__Gemmatimonadetes;o__KS3-K002;f__KS3-K002;g__KS3-K002;s__	N/A	N/A	N/A	N/A	N/A	GCA_011774835.1	95	d__Bacteria;p__Gemmatimonadota;c__Gemmatimonadetes;o__KS3-K002;f__KS3-K002;g__KS3-K002;s__KS3-K002 sp011774835	78.33	0.37	d__Bacteria;p__Gemmatimonadota;c__Gemmatimonadetes;o__KS3-K002;f__;g__;s__	taxonomic classification defined by topology and ANI	N/A	N/A	54.1
	M8-32_Bin_167	Group3	N	Yes	Gemmatimonadetes	d__Bacteria;p__Gemmatimonadota;c__Gemmatimonadetes;o__KS3-K002;f__JABDQB01;g__;s__	N	2.80816	4.43067	732	25911	4070	66.12	3165	2808159	2001	3836.3	Bohai Sea M8, China	Coastal Sediment	39.6928N/120.6606E	k__Bacteria (UID2495)	2993	147	91	55	84	8	0	0	0	63.38	4.21	25	d__Bacteria;p__Gemmatimonadota;c__Gemmatimonadetes;o__KS3-K002;f__JABDQB01;g__;s__	N/A	N/A	N/A	N/A	N/A	N/A	N/A	N/A	N/A	N/A	d__Bacteria;p__Gemmatimonadota;c__Gemmatimonadetes;o__KS3-K002;f__JABDQB01;g__;s__	taxonomic novelty determined using RED	N/A	N/A	53.96
	M8-32_Bin_173	Group4	Y	Yes	Gemmatimonadetes	d__Bacteria;p__Gemmatimonadota;c__Gemmatimonadetes;o__Longimicrobiales;f__UBA6960;g__;s__	N	6.46005	6.83531	300	196870	46535	67.52	5595	6460048	2100	21533.5	Bohai Sea M8, China	Coastal Sediment	39.6928N/120.6606E	k__Bacteria (UID2495)	2993	147	91	5	139	3	0	0	0	94.51	3.3	0	d__Bacteria;p__Gemmatimonadota;c__Gemmatimonadetes;o__Longimicrobiales;f__UBA6960;g__;s__	N/A	N/A	N/A	N/A	N/A	N/A	N/A	N/A	N/A	N/A	d__Bacteria;p__Gemmatimonadota;c__Gemmatimonadetes;o__Longimicrobiales;f__UBA6960;g__;s__	taxonomic classification fully defined by topology	N/A	N/A	88.11
	M8-32_Bin_183	Group2	Y	Yes	Gemmatimonadetes	d__Bacteria;p__Gemmatimonadota;c__Gemmatimonadetes;o__Gemmatimonadales;f__GWC2-71-9;g__WVYX01;s__	N	4.47943	4.63229	293	142786	26550	66.26	4185	4479427	2048	15288.1	Bohai Sea M8, China	Coastal Sediment	39.6928N/120.6606E	k__Bacteria (UID2495)	2993	147	91	4	137	6	0	0	0	96.7	4.95	33.33	d__Bacteria;p__Gemmatimonadota;c__Gemmatimonadetes;o__Gemmatimonadales;f__GWC2-71-9;g__WVYX01;s__	N/A	N/A	N/A	N/A	N/A	GCA_011772755.1	95	d__Bacteria;p__Gemmatimonadota;c__Gemmatimonadetes;o__Gemmatimonadales;f__GWC2-71-9;g__WVYX01;s__WVYX01 sp011772755	76.79	0.13	d__Bacteria;p__Gemmatimonadota;c__Gemmatimonadetes;o__Gemmatimonadales;f__GWC2-71-9;g__;s__	taxonomic classification defined by topology and ANI	N/A	N/A	87.39
	M8-32_Bin_184	Group2	Y	Yes	Gemmatimonadetes	d__Bacteria;p__Gemmatimonadota;c__Gemmatimonadetes;o__Gemmatimonadales;f__GWC2-71-9;g__WVYX01;s__	N	3.31368	3.46619	149	122030	45020	67.5	3103	3313681	2039	22239.5	Bohai Sea M8, China	Coastal Sediment	39.6928N/120.6606E	k__Bacteria (UID2495)	2993	147	91	4	140	3	0	0	0	95.6	3.3	0	d__Bacteria;p__Gemmatimonadota;c__Gemmatimonadetes;o__Gemmatimonadales;f__GWC2-71-9;g__WVYX01;s__	N/A	N/A	N/A	N/A	N/A	GCA_011772755.1	95	d__Bacteria;p__Gemmatimonadota;c__Gemmatimonadetes;o__Gemmatimonadales;f__GWC2-71-9;g__WVYX01;s__WVYX01 sp011772755	76.96	0.24	d__Bacteria;p__Gemmatimonadota;c__Gemmatimonadetes;o__Gemmatimonadales;f__GWC2-71-9;g__;s__	taxonomic classification defined by topology and ANI	N/A	N/A	91.21
	M8-32_Bin_201	Group3	Y	Yes	Gemmatimonadetes	d__Bacteria;p__Gemmatimonadota;c__Gemmatimonadetes;o__KS3-K002;f__JABDQB01;g__JABDQB01;s__	N	2.98979	3.36271	270	47688	15829	66.73	2912	2989786	2014	11073.3	Bohai Sea M8, China	Coastal Sediment	39.6928N/120.6606E	k__Bacteria (UID2495)	2993	147	91	11	132	4	0	0	0	88.91	4.4	50	d__Bacteria;p__Gemmatimonadota;c__Gemmatimonadetes;o__KS3-K002;f__JABDQB01;g__JABDQB01;s__	N/A	N/A	N/A	N/A	N/A	GCA_013042495.1	95	d__Bacteria;p__Gemmatimonadota;c__Gemmatimonadetes;o__KS3-K002;f__JABDQB01;g__JABDQB01;s__JABDQB01 sp013042495	77.65	0.28	d__Bacteria;p__Gemmatimonadota;c__Gemmatimonadetes;o__KS3-K002;f__JABDQB01;g__;s__	taxonomic classification defined by topology and ANI	N/A	N/A	86.58
	M8-32_Bin_206	Group3	N	Yes	Gemmatimonadetes	d__Bacteria;p__Gemmatimonadota;c__Gemmatimonadetes;o__KS3-K002;f__KS3-K002;g__;s__	N	3.38783	5.21686	798	27598	4545	61.68	3611	3387830	2000	4245.4	Bohai Sea M8, China	Coastal Sediment	39.6928N/120.6606E	k__Bacteria (UID2495)	2993	147	91	43	100	4	0	0	0	64.94	3.3	0	d__Bacteria;p__Gemmatimonadota;c__Gemmatimonadetes;o__KS3-K002;f__KS3-K002;g__;s__	N/A	N/A	N/A	N/A	N/A	GCA_011774835.1	95	d__Bacteria;p__Gemmatimonadota;c__Gemmatimonadetes;o__KS3-K002;f__KS3-K002;g__KS3-K002;s__KS3-K002 sp011774835	76.58	0.17	d__Bacteria;p__Gemmatimonadota;c__Gemmatimonadetes;o__KS3-K002;f__;g__;s__	taxonomic classification defined by topology and ANI	N/A	N/A	60.14
	M8-32_Bin_209	Group2	Y	Yes	Gemmatimonadetes	d__Bacteria;p__Gemmatimonadota;c__Gemmatimonadetes;o__Gemmatimonadales;f__GWC2-71-9;g__WVYX01;s__	N	4.52629	4.76201	240	116185	30651	64.1	4247	4526294	2011	18859.6	Bohai Sea M8, China	Coastal Sediment	39.6928N/120.6606E	k__Bacteria (UID2495)	2993	147	91	5	139	3	0	0	0	95.05	3.3	0	d__Bacteria;p__Gemmatimonadota;c__Gemmatimonadetes;o__Gemmatimonadales;f__GWC2-71-9;g__WVYX01;s__	N/A	N/A	N/A	N/A	N/A	GCA_011772755.1	95	d__Bacteria;p__Gemmatimonadota;c__Gemmatimonadetes;o__Gemmatimonadales;f__GWC2-71-9;g__WVYX01;s__WVYX01 sp011772755	76.4	0.08	d__Bacteria;p__Gemmatimonadota;c__Gemmatimonadetes;o__Gemmatimonadales;f__GWC2-71-9;g__;s__	taxonomic classification defined by topology and ANI	N/A	N/A	90.15
	M8-32_Bin_211	Group4	Y	Yes	Gemmatimonadetes	d__Bacteria;p__Gemmatimonadota;c__Gemmatimonadetes;o__Longimicrobiales;f__UBA6960;g__SZUA-318;s__	N	5.7986	5.8631	421	144033	26509	68.07	5158	5798601	2000	13773.4	Bohai Sea M8, China	Coastal Sediment	39.6928N/120.6606E	k__Bacteria (UID2495)	2993	147	91	1	142	4	0	0	0	98.9	4.4	0	d__Bacteria;p__Gemmatimonadota;c__Gemmatimonadetes;o__Longimicrobiales;f__UBA6960;g__SZUA-318;s__	N/A	N/A	N/A	N/A	N/A	GCA_003248075.1	95	d__Bacteria;p__Gemmatimonadota;c__Gemmatimonadetes;o__Longimicrobiales;f__UBA6960;g__SZUA-318;s__SZUA-318 sp003248075	77	0.24	d__Bacteria;p__Gemmatimonadota;c__Gemmatimonadetes;o__Longimicrobiales;f__UBA6960;g__;s__	taxonomic classification defined by topology and ANI	N/A	N/A	89.68
	M8-32_Bin_213	Group3	Y	Yes	Gemmatimonadetes	d__Bacteria;p__Gemmatimonadota;c__Gemmatimonadetes;o__KS3-K002;f__KS3-K002;g__KS3-K002;s__	N	3.97236	4.25261	303	87083	21213	65.06	3670	3972360	2003	13110.1	Bohai Sea M8, China	Coastal Sediment	39.6928N/120.6606E	k__Bacteria (UID2495)	2993	147	91	7	137	3	0	0	0	93.41	3.3	0	d__Bacteria;p__Gemmatimonadota;c__Gemmatimonadetes;o__KS3-K002;f__KS3-K002;g__KS3-K002;s__	N/A	N/A	N/A	N/A	N/A	GCA_011774835.1	95	d__Bacteria;p__Gemmatimonadota;c__Gemmatimonadetes;o__KS3-K002;f__KS3-K002;g__KS3-K002;s__KS3-K002 sp011774835	77.97	0.27	d__Bacteria;p__Gemmatimonadota;c__Gemmatimonadetes;o__KS3-K002;f__;g__;s__	taxonomic classification defined by topology and ANI	N/A	N/A	85.61
	M8-32_Bin_220	Group2	Y	Yes	Gemmatimonadetes	d__Bacteria;p__Gemmatimonadota;c__Gemmatimonadetes;o__Gemmatimonadales;f__GWC2-71-9;g__WVYX01;s__	N	3.04046	3.1804	272	53639	15691	66.23	2977	3040461	2057	11178.2	Bohai Sea M8, China	Coastal Sediment	39.6928N/120.6606E	k__Bacteria (UID2495)	2993	147	91	4	140	3	0	0	0	95.6	2.3	0	d__Bacteria;p__Gemmatimonadota;c__Gemmatimonadetes;o__Gemmatimonadales;f__GWC2-71-9;g__WVYX01;s__	N/A	N/A	N/A	N/A	N/A	GCA_011772755.1	95	d__Bacteria;p__Gemmatimonadota;c__Gemmatimonadetes;o__Gemmatimonadales;f__GWC2-71-9;g__WVYX01;s__WVYX01 sp011772755	76.57	0.17	d__Bacteria;p__Gemmatimonadota;c__Gemmatimonadetes;o__Gemmatimonadales;f__GWC2-71-9;g__;s__	taxonomic classification defined by topology and ANI	N/A	N/A	89.99
	M8-32_Bin_239	Group3	Y	Yes	Gemmatimonadetes	d__Bacteria;p__Gemmatimonadota;c__Gemmatimonadetes;o__KS3-K002;f__KS3-K002;g__KS3-K002;s__	N	4.19893	4.54873	333	91789	16729	64.47	3931	4198932	2068	12609.4	Bohai Sea M8, China	Coastal Sediment	39.6928N/120.6606E	k__Bacteria (UID2495)	2993	147	91	7	134	6	0	0	0	92.31	4.09	33.33	d__Bacteria;p__Gemmatimonadota;c__Gemmatimonadetes;o__KS3-K002;f__KS3-K002;g__KS3-K002;s__	N/A	N/A	N/A	N/A	N/A	GCA_011774835.1	95	d__Bacteria;p__Gemmatimonadota;c__Gemmatimonadetes;o__KS3-K002;f__KS3-K002;g__KS3-K002;s__KS3-K002 sp011774835	77.43	0.26	d__Bacteria;p__Gemmatimonadota;c__Gemmatimonadetes;o__KS3-K002;f__;g__;s__	taxonomic classification defined by topology and ANI	N/A	N/A	86.48
	M8-32_Bin_247	Group4	Y	Yes	Gemmatimonadetes	d__Bacteria;p__Gemmatimonadota;c__Gemmatimonadetes;o__Longimicrobiales;f__UBA6960;g__UBA2589;s__	N	5.01507	5.49838	641	43385	10571	67.43	4741	5015074	2010	7823.8	Bohai Sea M8, China	Coastal Sediment	39.6928N/120.6606E	k__Bacteria (UID2495)	2993	147	91	11	132	4	0	0	0	91.21	4.4	25	d__Bacteria;p__Gemmatimonadota;c__Gemmatimonadetes;o__Longimicrobiales;f__UBA6960;g__UBA2589;s__	N/A	N/A	N/A	N/A	N/A	N/A	N/A	N/A	N/A	N/A	d__Bacteria;p__Gemmatimonadota;c__Gemmatimonadetes;o__Longimicrobiales;f__UBA6960;g__UBA2589;s__	ANI	N/A	GCA_013002885.1, s__UBA2589 sp013002885, 95.0, 77.11, 0.2; GCA_002390225.1, s__UBA2589 sp002390225, 95.0, 77.09, 0.21; GCA_002348465.1, s__UBA2589 sp002348465, 95.0, 75.94, 0.05; GCA_002500925.1, s__UBA2589 sp002500925, 95.0, 75.77, 0.06; GCA_002348265.1, s__UBA2589 sp002348265, 95.0, 75.67, 0.05	80.74
	M8-32_Bin_256	Group2	Y	Yes	Gemmatimonadetes	d__Bacteria;p__Gemmatimonadota;c__Gemmatimonadetes;o__Gemmatimonadales;f__GWC2-71-9;g__WVYX01;s__	N	4.56164	5.2505	652	62225	9028	66.64	4473	4561637	2001	6996.4	Bohai Sea M8, China	Coastal Sediment	39.6928N/120.6606E	k__Bacteria (UID2495)	2993	147	91	18	125	4	0	0	0	86.88	3.36	0	d__Bacteria;p__Gemmatimonadota;c__Gemmatimonadetes;o__Gemmatimonadales;f__GWC2-71-9;g__WVYX01;s__	N/A	N/A	N/A	N/A	N/A	GCA_011772755.1	95	d__Bacteria;p__Gemmatimonadota;c__Gemmatimonadetes;o__Gemmatimonadales;f__GWC2-71-9;g__WVYX01;s__WVYX01 sp011772755	76.13	0.11	d__Bacteria;p__Gemmatimonadota;c__Gemmatimonadetes;o__Gemmatimonadales;f__GWC2-71-9;g__;s__	taxonomic classification defined by topology and ANI	N/A	N/A	78.82
	M8-32_Bin_274	Group4	N	Yes	Gemmatimonadetes	d__Bacteria;p__Gemmatimonadota;c__Gemmatimonadetes;o__Longimicrobiales;f__UBA6960;g__JABDNZ01;s__	N	4.75373	5.32989	883	28257	6394	63.03	4639	4753730	2003	5383.6	Bohai Sea M8, China	Coastal Sediment	39.6928N/120.6606E	k__Bacteria (UID2495)	2993	147	91	15	127	5	0	0	0	89.19	5.49	0	d__Bacteria;p__Gemmatimonadota;c__Gemmatimonadetes;o__Longimicrobiales;f__UBA6960;g__JABDNZ01;s__	N/A	N/A	N/A	N/A	N/A	GCA_013043565.1	95	d__Bacteria;p__Gemmatimonadota;c__Gemmatimonadetes;o__Longimicrobiales;f__UBA6960;g__JABDNZ01;s__JABDNZ01 sp013043565	77.13	0.15	d__Bacteria;p__Gemmatimonadota;c__Gemmatimonadetes;o__Longimicrobiales;f__UBA6960;g__;s__	taxonomic classification defined by topology and ANI	N/A	N/A	77.7
	M8-32_Bin_283	Group2	N	Yes	Gemmatimonadetes	d__Bacteria;p__Gemmatimonadota;c__Gemmatimonadetes;o__Gemmatimonadales;f__GWC2-71-9;g__WVYX01;s__	N	3.11204	3.63089	155	76735	31716	67.71	2987	3112040	2288	20077.7	Bohai Sea M8, China	Coastal Sediment	39.6928N/120.6606E	k__Bacteria (UID2495)	2993	147	91	29	110	8	0	0	0	85.71	6.17	50	d__Bacteria;p__Gemmatimonadota;c__Gemmatimonadetes;o__Gemmatimonadales;f__GWC2-71-9;g__WVYX01;s__	N/A	N/A	N/A	N/A	N/A	GCA_011772755.1	95	d__Bacteria;p__Gemmatimonadota;c__Gemmatimonadetes;o__Gemmatimonadales;f__GWC2-71-9;g__WVYX01;s__WVYX01 sp011772755	77	0.21	d__Bacteria;p__Gemmatimonadota;c__Gemmatimonadetes;o__Gemmatimonadales;f__GWC2-71-9;g__;s__	taxonomic classification defined by topology and ANI	N/A	N/A	79.63
	M8-32_Bin_286	Group3	Y	Yes	Gemmatimonadetes	d__Bacteria;p__Gemmatimonadota;c__Gemmatimonadetes;o__KS3-K002;f__JABDQB01;g__;s__	N	3.84565	4.19556	375	114576	14009	65.07	3598	3845647	2008	10255.1	Bohai Sea M8, China	Coastal Sediment	39.6928N/120.6606E	k__Bacteria (UID2495)	2993	147	91	9	136	2	0	0	0	91.66	2.2	0	d__Bacteria;p__Gemmatimonadota;c__Gemmatimonadetes;o__KS3-K002;f__JABDQB01;g__;s__	N/A	N/A	N/A	N/A	N/A	N/A	N/A	N/A	N/A	N/A	d__Bacteria;p__Gemmatimonadota;c__Gemmatimonadetes;o__KS3-K002;f__JABDQB01;g__;s__	taxonomic novelty determined using RED	N/A	N/A	87.81
	M8-32_Bin_70	Group3	Y	Yes	Gemmatimonadetes	d__Bacteria;p__Gemmatimonadota;c__Gemmatimonadetes;o__KS3-K002;f__JABDQB01;g__JABDQB01;s__	N	3.36734	3.44309	309	152149	18750	65.75	3292	3367345	2020	10897.6	Bohai Sea M8, China	Coastal Sediment	39.6928N/120.6606E	k__Bacteria (UID2495)	2993	147	91	2	141	4	0	0	0	97.8	3.4	25	d__Bacteria;p__Gemmatimonadota;c__Gemmatimonadetes;o__KS3-K002;f__JABDQB01;g__JABDQB01;s__	N/A	N/A	N/A	N/A	N/A	GCA_013042495.1	95	d__Bacteria;p__Gemmatimonadota;c__Gemmatimonadetes;o__KS3-K002;f__JABDQB01;g__JABDQB01;s__JABDQB01 sp013042495	79.76	0.57	d__Bacteria;p__Gemmatimonadota;c__Gemmatimonadetes;o__KS3-K002;f__JABDQB01;g__;s__	taxonomic classification defined by topology and ANI	N/A	N/A	88.74
	M8-32_Bin_87	Group2	N	Yes	Gemmatimonadetes	d__Bacteria;p__Gemmatimonadota;c__Gemmatimonadetes;o__Gemmatimonadales;f__GWC2-71-9;g__;s__	N	5.65137	9.63083	1610	13302	3571	62.67	6159	5651371	2000	3510.2	Bohai Sea M8, China	Coastal Sediment	39.6928N/120.6606E	k__Bacteria (UID2495)	2993	147	91	51	93	3	0	0	0	58.68	2.75	0	d__Bacteria;p__Gemmatimonadota;c__Gemmatimonadetes;o__Gemmatimonadales;f__GWC2-71-9;g__;s__	N/A	N/A	N/A	N/A	N/A	N/A	N/A	N/A	N/A	N/A	d__Bacteria;p__Gemmatimonadota;c__Gemmatimonadetes;o__Gemmatimonadales;f__GWC2-71-9;g__;s__	taxonomic classification fully defined by topology	N/A	N/A	55.99
	M8-32_Bin_92	Group2	N	Yes	Gemmatimonadetes	d__Bacteria;p__Gemmatimonadota;c__Gemmatimonadetes;o__Gemmatimonadales;f__GWC2-71-9;g__JABDII01;s__	N	3.59395	4.36053	741	27213	5619	62.65	3954	3593952	2000	4850.1	Bohai Sea M8, China	Coastal Sediment	39.6928N/120.6606E	k__Bacteria (UID2495)	2993	147	91	17	120	10	0	0	0	82.42	8.86	0	d__Bacteria;p__Gemmatimonadota;c__Gemmatimonadetes;o__Gemmatimonadales;f__GWC2-71-9;g__JABDII01;s__	N/A	N/A	N/A	N/A	N/A	GCA_013003805.1	95	d__Bacteria;p__Gemmatimonadota;c__Gemmatimonadetes;o__Gemmatimonadales;f__GWC2-71-9;g__JABDII01;s__JABDII01 sp013003805	84.71	0.55	d__Bacteria;p__Gemmatimonadota;c__Gemmatimonadetes;o__Gemmatimonadales;f__GWC2-71-9;g__;s__	taxonomic classification defined by topology and ANI	N/A	N/A	75.4
	M8-32_Bin_99	Group2	N	Yes	Gemmatimonadetes	d__Bacteria;p__Gemmatimonadota;c__Gemmatimonadetes;o__Gemmatimonadales;f__GWC2-71-9;g__WVYX01;s__	N	3.118	4.59205	879	41079	3580	60.56	3636	3117999	2000	3547.2	Bohai Sea M8, China	Coastal Sediment	39.6928N/120.6606E	k__Bacteria (UID2495)	2993	147	91	36	108	3	0	0	0	67.9	2.75	0	d__Bacteria;p__Gemmatimonadota;c__Gemmatimonadetes;o__Gemmatimonadales;f__GWC2-71-9;g__WVYX01;s__	N/A	N/A	N/A	N/A	N/A	GCA_011772755.1	95	d__Bacteria;p__Gemmatimonadota;c__Gemmatimonadetes;o__Gemmatimonadales;f__GWC2-71-9;g__WVYX01;s__WVYX01 sp011772755	75.75	0.05	d__Bacteria;p__Gemmatimonadota;c__Gemmatimonadetes;o__Gemmatimonadales;f__GWC2-71-9;g__;s__	taxonomic classification defined by topology and ANI	N/A	N/A	62.97
	M8-44_Bin_110	Group2	Y	Yes	Gemmatimonadetes	d__Bacteria;p__Gemmatimonadota;c__Gemmatimonadetes;o__Gemmatimonadales;f__GWC2-71-9;g__WVYX01;s__	N	5.96959	6.76211	835	69927	10728	59.76	6299	5969590	2001	7149.2	Bohai Sea M8, China	Coastal Sediment	39.6928N/120.6606E	k__Bacteria (UID2495)	2993	147	91	13	130	4	0	0	0	88.28	3.36	0	d__Bacteria;p__Gemmatimonadota;c__Gemmatimonadetes;o__Gemmatimonadales;f__GWC2-71-9;g__WVYX01;s__	N/A	N/A	N/A	N/A	N/A	GCA_011772755.1	95	d__Bacteria;p__Gemmatimonadota;c__Gemmatimonadetes;o__Gemmatimonadales;f__GWC2-71-9;g__WVYX01;s__WVYX01 sp011772755	76.82	0.07	d__Bacteria;p__Gemmatimonadota;c__Gemmatimonadetes;o__Gemmatimonadales;f__GWC2-71-9;g__;s__	taxonomic classification defined by topology and ANI	N/A	N/A	84.36
	M8-44_Bin_119	Group2	N	Yes	Gemmatimonadetes	d__Bacteria;p__Gemmatimonadota;c__Gemmatimonadetes;o__Gemmatimonadales;f__GWC2-71-9;g__JABDII01;s__	N	2.78169	4.56015	712	28635	4013	63.48	3314	2781694	2000	3906.9	Bohai Sea M8, China	Coastal Sediment	39.6928N/120.6606E	k__Bacteria (UID2495)	2993	147	91	60	83	4	0	0	0	61	3.85	0	d__Bacteria;p__Gemmatimonadota;c__Gemmatimonadetes;o__Gemmatimonadales;f__GWC2-71-9;g__JABDII01;s__	N/A	N/A	N/A	N/A	N/A	GCA_013003805.1	95	d__Bacteria;p__Gemmatimonadota;c__Gemmatimonadetes;o__Gemmatimonadales;f__GWC2-71-9;g__JABDII01;s__JABDII01 sp013003805	84.11	0.41	d__Bacteria;p__Gemmatimonadota;c__Gemmatimonadetes;o__Gemmatimonadales;f__GWC2-71-9;g__;s__	taxonomic classification defined by topology and ANI	N/A	N/A	48.36
	M8-44_Bin_129	Group2	Y	Yes	Gemmatimonadetes	d__Bacteria;p__Gemmatimonadota;c__Gemmatimonadetes;o__Gemmatimonadales;f__GWC2-71-9;g__WVYX01;s__	N	4.85904	5.45898	823	44024	7878	61	5176	4859039	2002	5904.1	Bohai Sea M8, China	Coastal Sediment	39.6928N/120.6606E	k__Bacteria (UID2495)	2993	147	91	10	134	3	0	0	0	89.01	2.75	0	d__Bacteria;p__Gemmatimonadota;c__Gemmatimonadetes;o__Gemmatimonadales;f__GWC2-71-9;g__WVYX01;s__	N/A	N/A	N/A	N/A	N/A	GCA_011772755.1	95	d__Bacteria;p__Gemmatimonadota;c__Gemmatimonadetes;o__Gemmatimonadales;f__GWC2-71-9;g__WVYX01;s__WVYX01 sp011772755	75.97	0.06	d__Bacteria;p__Gemmatimonadota;c__Gemmatimonadetes;o__Gemmatimonadales;f__GWC2-71-9;g__;s__	taxonomic classification defined by topology and ANI	N/A	N/A	83.3
	M8-44_Bin_132	Group2	N	Yes	Gemmatimonadetes	d__Bacteria;p__Gemmatimonadota;c__Gemmatimonadetes;o__Gemmatimonadales;f__GWC2-71-9;g__WVYX01;s__	N	3.29878	5.36039	638	32004	5925	66.69	3540	3298782	2002	5170.5	Bohai Sea M8, China	Coastal Sediment	39.6928N/120.6606E	k__Bacteria (UID2495)	2993	147	91	64	79	3	1	0	0	61.54	5.49	100	d__Bacteria;p__Gemmatimonadota;c__Gemmatimonadetes;o__Gemmatimonadales;f__GWC2-71-9;g__WVYX01;s__	N/A	N/A	N/A	N/A	N/A	GCA_011772755.1	95	d__Bacteria;p__Gemmatimonadota;c__Gemmatimonadetes;o__Gemmatimonadales;f__GWC2-71-9;g__WVYX01;s__WVYX01 sp011772755	76.75	0.16	d__Bacteria;p__Gemmatimonadota;c__Gemmatimonadetes;o__Gemmatimonadales;f__GWC2-71-9;g__;s__	taxonomic classification defined by topology and ANI	N/A	N/A	46.3
	M8-44_Bin_134	Group2	Y	Yes	Gemmatimonadetes	d__Bacteria;p__Gemmatimonadota;c__Gemmatimonadetes;o__Gemmatimonadales;f__GWC2-71-9;g__WVYX01;s__	N	4.10648	4.62702	595	57266	9994	63.55	4312	4106482	2000	6901.7	Bohai Sea M8, China	Coastal Sediment	39.6928N/120.6606E	k__Bacteria (UID2495)	2993	147	91	13	132	2	0	0	0	88.75	2.2	0	d__Bacteria;p__Gemmatimonadota;c__Gemmatimonadetes;o__Gemmatimonadales;f__GWC2-71-9;g__WVYX01;s__	N/A	N/A	N/A	N/A	N/A	GCA_011772755.1	95	d__Bacteria;p__Gemmatimonadota;c__Gemmatimonadetes;o__Gemmatimonadales;f__GWC2-71-9;g__WVYX01;s__WVYX01 sp011772755	76.23	0.06	d__Bacteria;p__Gemmatimonadota;c__Gemmatimonadetes;o__Gemmatimonadales;f__GWC2-71-9;g__;s__	taxonomic classification defined by topology and ANI	N/A	N/A	84.32
	M8-44_Bin_136	Group4	Y	Yes	Gemmatimonadetes	d__Bacteria;p__Gemmatimonadota;c__Gemmatimonadetes;o__Longimicrobiales;f__UBA6960;g__;s__	N	6.50132	6.58561	312	309000	50706	67.51	5721	6501316	2027	20837.6	Bohai Sea M8, China	Coastal Sediment	39.6928N/120.6606E	k__Bacteria (UID2495)	2993	147	91	2	140	5	0	0	0	98.72	4.46	20	d__Bacteria;p__Gemmatimonadota;c__Gemmatimonadetes;o__Longimicrobiales;f__UBA6960;g__;s__	N/A	N/A	N/A	N/A	N/A	N/A	N/A	N/A	N/A	N/A	d__Bacteria;p__Gemmatimonadota;c__Gemmatimonadetes;o__Longimicrobiales;f__UBA6960;g__;s__	taxonomic classification fully defined by topology	N/A	N/A	88.74
	M8-44_Bin_139	Group2	N	Yes	Gemmatimonadetes	d__Bacteria;p__Gemmatimonadota;c__Gemmatimonadetes;o__Gemmatimonadales;f__GWC2-71-9;g__WVYX01;s__	N	4.85306	6.43984	1153	25823	4529	59.19	5203	4853061	2000	4209.1	Bohai Sea M8, China	Coastal Sediment	39.6928N/120.6606E	k__Bacteria (UID2495)	2993	147	91	26	106	14	1	0	0	75.36	6.7	11.76	d__Bacteria;p__Gemmatimonadota;c__Gemmatimonadetes;o__Gemmatimonadales;f__GWC2-71-9;g__WVYX01;s__	N/A	N/A	N/A	N/A	N/A	GCA_011772755.1	95	d__Bacteria;p__Gemmatimonadota;c__Gemmatimonadetes;o__Gemmatimonadales;f__GWC2-71-9;g__WVYX01;s__WVYX01 sp011772755	76.36	0.04	d__Bacteria;p__Gemmatimonadota;c__Gemmatimonadetes;o__Gemmatimonadales;f__GWC2-71-9;g__;s__	taxonomic classification defined by topology and ANI	N/A	N/A	64.34
	M8-44_Bin_140	Group1	Y	Yes	Gemmatimonadetes	d__Bacteria;p__Gemmatimonadota;c__Gemmatimonadetes;o__JACCXV01;f__;g__;s__	N	2.48028	2.87036	337	67683	10401	62.18	2688	2480278	2000	7359.9	Bohai Sea M8, China	Coastal Sediment	39.6928N/120.6606E	k__Bacteria (UID2495)	2993	147	91	19	124	4	0	0	0	86.41	3.48	75	d__Bacteria;p__Gemmatimonadota;c__Gemmatimonadetes;o__JACCXV01;f__;g__;s__	N/A	N/A	N/A	N/A	N/A	GCA_013696835.1	95	d__Bacteria;p__Gemmatimonadota;c__Gemmatimonadetes;o__JACCXV01;f__JACCXV01;g__JACCXV01;s__JACCXV01 sp013696835	75.23	0.04	d__Bacteria;p__Gemmatimonadota;c__Gemmatimonadetes;o__;f__;g__;s__	taxonomic classification defined by topology and ANI	N/A	N/A	75.06
	M8-44_Bin_144	Group2	N	Yes	Gemmatimonadetes	d__Bacteria;p__Gemmatimonadota;c__Gemmatimonadetes;o__Gemmatimonadales;f__GWC2-71-9;g__WVYX01;s__	N	3.07703	4.93114	919	10687	3438	62.36	3409	3077031	2000	3348.2	Bohai Sea M8, China	Coastal Sediment	39.6928N/120.6606E	k__Bacteria (UID2495)	2993	147	91	48	86	12	1	0	0	62.4	8.99	0	d__Bacteria;p__Gemmatimonadota;c__Gemmatimonadetes;o__Gemmatimonadales;f__GWC2-71-9;g__WVYX01;s__	N/A	N/A	N/A	N/A	N/A	GCA_011772755.1	95	d__Bacteria;p__Gemmatimonadota;c__Gemmatimonadetes;o__Gemmatimonadales;f__GWC2-71-9;g__WVYX01;s__WVYX01 sp011772755	75.63	0.05	d__Bacteria;p__Gemmatimonadota;c__Gemmatimonadetes;o__Gemmatimonadales;f__GWC2-71-9;g__;s__	taxonomic classification defined by topology and ANI	N/A	N/A	53.56
	M8-44_Bin_145	Group1	N	Yes	Gemmatimonadetes	d__Bacteria;p__Gemmatimonadota;c__Gemmatimonadetes;o__JACCXV01;f__;g__;s__	N	2.58825	2.96546	349	49723	11132	61.86	2854	2588251	2004	7416.2	Bohai Sea M8, China	Coastal Sediment	39.6928N/120.6606E	k__Bacteria (UID2495)	2993	147	91	18	117	11	1	0	0	87.28	6.83	21.43	d__Bacteria;p__Gemmatimonadota;c__Gemmatimonadetes;o__JACCXV01;f__;g__;s__	N/A	N/A	N/A	N/A	N/A	GCA_013696835.1	95	d__Bacteria;p__Gemmatimonadota;c__Gemmatimonadetes;o__JACCXV01;f__JACCXV01;g__JACCXV01;s__JACCXV01 sp013696835	75.44	0.04	d__Bacteria;p__Gemmatimonadota;c__Gemmatimonadetes;o__;f__;g__;s__	taxonomic classification defined by topology and ANI	N/A	N/A	75.34
	M8-44_Bin_146	Group1	Y	Yes	Gemmatimonadetes	d__Bacteria;p__Gemmatimonadota;c__Gemmatimonadetes;o__JACCXV01;f__;g__;s__	N	2.52639	2.86829	286	58897	13667	62.03	2731	2526389	2015	8833.5	Bohai Sea M8, China	Coastal Sediment	39.6928N/120.6606E	k__Bacteria (UID2495)	2993	147	91	15	126	6	0	0	0	88.08	4.68	50	d__Bacteria;p__Gemmatimonadota;c__Gemmatimonadetes;o__JACCXV01;f__;g__;s__	N/A	N/A	N/A	N/A	N/A	GCA_013696835.1	95	d__Bacteria;p__Gemmatimonadota;c__Gemmatimonadetes;o__JACCXV01;f__JACCXV01;g__JACCXV01;s__JACCXV01 sp013696835	75.22	0.03	d__Bacteria;p__Gemmatimonadota;c__Gemmatimonadetes;o__;f__;g__;s__	taxonomic classification defined by topology and ANI	N/A	N/A	81.12
	M8-44_Bin_150	Group3	N	Yes	Gemmatimonadetes	d__Bacteria;p__Gemmatimonadota;c__Gemmatimonadetes;o__KS3-K002;f__KS3-K002;g__;s__	N	5.02616	6.1392	719	46455	8649	63.06	4807	5026163	2002	6990.5	Bohai Sea M8, China	Coastal Sediment	39.6928N/120.6606E	k__Bacteria (UID2495)	2993	147	91	17	124	5	1	0	0	81.87	5.49	50	d__Bacteria;p__Gemmatimonadota;c__Gemmatimonadetes;o__KS3-K002;f__KS3-K002;g__;s__	N/A	N/A	N/A	N/A	N/A	GCA_011774835.1	95	d__Bacteria;p__Gemmatimonadota;c__Gemmatimonadetes;o__KS3-K002;f__KS3-K002;g__KS3-K002;s__KS3-K002 sp011774835	76.84	0.16	d__Bacteria;p__Gemmatimonadota;c__Gemmatimonadetes;o__KS3-K002;f__;g__;s__	taxonomic classification defined by topology and ANI	N/A	N/A	79.63
	M8-44_Bin_155	Group2	Y	Yes	Gemmatimonadetes	d__Bacteria;p__Gemmatimonadota;c__Gemmatimonadetes;o__Gemmatimonadales;f__GWC2-71-9;g__WVYX01;s__	N	3.83265	3.91887	133	191081	52605	65.76	3549	3832655	2083	28817	Bohai Sea M8, China	Coastal Sediment	39.6928N/120.6606E	k__Bacteria (UID2495)	2993	147	91	2	143	2	0	0	0	97.8	2.2	0	d__Bacteria;p__Gemmatimonadota;c__Gemmatimonadetes;o__Gemmatimonadales;f__GWC2-71-9;g__WVYX01;s__	N/A	N/A	N/A	N/A	N/A	GCA_011772755.1	95	d__Bacteria;p__Gemmatimonadota;c__Gemmatimonadetes;o__Gemmatimonadales;f__GWC2-71-9;g__WVYX01;s__WVYX01 sp011772755	76.67	0.13	d__Bacteria;p__Gemmatimonadota;c__Gemmatimonadetes;o__Gemmatimonadales;f__GWC2-71-9;g__;s__	taxonomic classification defined by topology and ANI	N/A	N/A	92.95
	M8-44_Bin_158	Group2	Y	Yes	Gemmatimonadetes	d__Bacteria;p__Gemmatimonadota;c__Gemmatimonadetes;o__Gemmatimonadales;f__GWC2-71-9;g__WVYX01;s__	N	3.20377	3.35122	175	86535	31797	67.6	3039	3203768	2009	18307.2	Bohai Sea M8, China	Coastal Sediment	39.6928N/120.6606E	k__Bacteria (UID2495)	2993	147	91	5	139	3	0	0	0	95.6	3.3	0	d__Bacteria;p__Gemmatimonadota;c__Gemmatimonadetes;o__Gemmatimonadales;f__GWC2-71-9;g__WVYX01;s__	N/A	N/A	N/A	N/A	N/A	GCA_011772755.1	95	d__Bacteria;p__Gemmatimonadota;c__Gemmatimonadetes;o__Gemmatimonadales;f__GWC2-71-9;g__WVYX01;s__WVYX01 sp011772755	76.98	0.24	d__Bacteria;p__Gemmatimonadota;c__Gemmatimonadetes;o__Gemmatimonadales;f__GWC2-71-9;g__;s__	taxonomic classification defined by topology and ANI	N/A	N/A	90.07
	M8-44_Bin_172	Group3	Y	Yes	Gemmatimonadetes	d__Bacteria;p__Gemmatimonadota;c__Gemmatimonadetes;o__KS3-K002;f__JABDQB01;g__;s__	N	3.74388	3.96136	440	71863	11344	65.07	3580	3743881	2000	8508.8	Bohai Sea M8, China	Coastal Sediment	39.6928N/120.6606E	k__Bacteria (UID2495)	2993	147	91	5	137	5	0	0	0	94.51	4.46	20	d__Bacteria;p__Gemmatimonadota;c__Gemmatimonadetes;o__KS3-K002;f__JABDQB01;g__;s__	N/A	N/A	N/A	N/A	N/A	N/A	N/A	N/A	N/A	N/A	d__Bacteria;p__Gemmatimonadota;c__Gemmatimonadetes;o__KS3-K002;f__JABDQB01;g__;s__	taxonomic novelty determined using RED	N/A	N/A	86.18
	M8-44_Bin_191	Group4	Y	Yes	Gemmatimonadetes	d__Bacteria;p__Gemmatimonadota;c__Gemmatimonadetes;o__Longimicrobiales;f__UBA6960;g__UBA822;s__	N	3.2103	3.54847	389	52166	11677	63.98	3190	3210305	2000	8252.7	Bohai Sea M8, China	Coastal Sediment	39.6928N/120.6606E	k__Bacteria (UID2495)	2993	147	91	13	130	4	0	0	0	90.47	3.4	25	d__Bacteria;p__Gemmatimonadota;c__Gemmatimonadetes;o__Longimicrobiales;f__UBA6960;g__UBA822;s__	N/A	N/A	N/A	N/A	N/A	N/A	N/A	N/A	N/A	N/A	d__Bacteria;p__Gemmatimonadota;c__Gemmatimonadetes;o__Longimicrobiales;f__UBA6960;g__;s__	taxonomic novelty determined using RED	N/A	N/A	83.38
	M8-44_Bin_1	Group3	Y	Yes	Gemmatimonadetes	d__Bacteria;p__Gemmatimonadota;c__Gemmatimonadetes;o__KS3-K002;f__KS3-K002;g__KS3-K002;s__	N	4.32164	5.38724	699	47227	7485	63.25	4270	4321641	2015	6182.6	Bohai Sea M8, China	Coastal Sediment	39.6928N/120.6606E	k__Bacteria (UID2495)	2993	147	91	21	123	3	0	0	0	80.22	2.26	0	d__Bacteria;p__Gemmatimonadota;c__Gemmatimonadetes;o__KS3-K002;f__KS3-K002;g__KS3-K002;s__	N/A	N/A	N/A	N/A	N/A	GCA_011774835.1	95	d__Bacteria;p__Gemmatimonadota;c__Gemmatimonadetes;o__KS3-K002;f__KS3-K002;g__KS3-K002;s__KS3-K002 sp011774835	76.62	0.14	d__Bacteria;p__Gemmatimonadota;c__Gemmatimonadetes;o__KS3-K002;f__;g__;s__	taxonomic classification defined by topology and ANI	N/A	N/A	71.73
	M8-44_Bin_203	Group3	Y	Yes	Gemmatimonadetes	d__Bacteria;p__Gemmatimonadota;c__Gemmatimonadetes;o__KS3-K002;f__KS3-K002;g__KS3-K002;s__	N	3.28366	4.02311	661	26182	5738	64.35	3410	3283659	2001	4967.7	Bohai Sea M8, China	Coastal Sediment	39.6928N/120.6606E	k__Bacteria (UID2495)	2993	147	91	25	119	3	0	0	0	81.62	2.3	33.33	d__Bacteria;p__Gemmatimonadota;c__Gemmatimonadetes;o__KS3-K002;f__KS3-K002;g__KS3-K002;s__	N/A	N/A	N/A	N/A	N/A	GCA_011774835.1	95	d__Bacteria;p__Gemmatimonadota;c__Gemmatimonadetes;o__KS3-K002;f__KS3-K002;g__KS3-K002;s__KS3-K002 sp011774835	78.58	0.36	d__Bacteria;p__Gemmatimonadota;c__Gemmatimonadetes;o__KS3-K002;f__;g__;s__	taxonomic classification defined by topology and ANI	N/A	N/A	70.56
	M8-44_Bin_217	Group3	Y	Yes	Gemmatimonadetes	d__Bacteria;p__Gemmatimonadota;c__Gemmatimonadetes;o__KS3-K002;f__KS3-K002;g__KS3-K002;s__	N	3.56392	3.93109	466	62273	10146	65.19	3482	3563923	2011	7647.9	Bohai Sea M8, China	Coastal Sediment	39.6928N/120.6606E	k__Bacteria (UID2495)	2993	147	91	10	133	4	0	0	0	90.66	4.4	25	d__Bacteria;p__Gemmatimonadota;c__Gemmatimonadetes;o__KS3-K002;f__KS3-K002;g__KS3-K002;s__	N/A	N/A	N/A	N/A	N/A	GCA_011774835.1	95	d__Bacteria;p__Gemmatimonadota;c__Gemmatimonadetes;o__KS3-K002;f__KS3-K002;g__KS3-K002;s__KS3-K002 sp011774835	77.83	0.27	d__Bacteria;p__Gemmatimonadota;c__Gemmatimonadetes;o__KS3-K002;f__;g__;s__	taxonomic classification defined by topology and ANI	N/A	N/A	80.33
	M8-44_Bin_243	Group3	Y	Yes	Gemmatimonadetes	d__Bacteria;p__Gemmatimonadota;c__Gemmatimonadetes;o__KS3-K002;f__JABDQB01;g__JABDQB01;s__	N	2.96097	3.11517	240	67132	19727	65.72	2954	2960968	2222	12337.4	Bohai Sea M8, China	Coastal Sediment	39.6928N/120.6606E	k__Bacteria (UID2495)	2993	147	91	5	140	2	0	0	0	95.05	2.2	0	d__Bacteria;p__Gemmatimonadota;c__Gemmatimonadetes;o__KS3-K002;f__JABDQB01;g__JABDQB01;s__	N/A	N/A	N/A	N/A	N/A	GCA_013042495.1	95	d__Bacteria;p__Gemmatimonadota;c__Gemmatimonadetes;o__KS3-K002;f__JABDQB01;g__JABDQB01;s__JABDQB01 sp013042495	76.83	0.12	d__Bacteria;p__Gemmatimonadota;c__Gemmatimonadetes;o__KS3-K002;f__JABDQB01;g__;s__	taxonomic classification defined by topology and ANI	N/A	N/A	87.59
	M8-44_Bin_24	Group3	N	Yes	Gemmatimonadetes	d__Bacteria;p__Gemmatimonadota;c__Gemmatimonadetes;o__KS3-K002;f__JABDQB01;g__;s__	N	3.27577	4.67166	916	26647	3578	65.28	3715	3275771	2001	3576.2	Bohai Sea M8, China	Coastal Sediment	39.6928N/120.6606E	k__Bacteria (UID2495)	2993	147	91	45	96	6	0	0	0	70.12	6.04	83.33	d__Bacteria;p__Gemmatimonadota;c__Gemmatimonadetes;o__KS3-K002;f__JABDQB01;g__;s__	N/A	N/A	N/A	N/A	N/A	N/A	N/A	N/A	N/A	N/A	d__Bacteria;p__Gemmatimonadota;c__Gemmatimonadetes;o__KS3-K002;f__JABDQB01;g__;s__	taxonomic novelty determined using RED	N/A	N/A	59.24
	M8-44_Bin_267	Group3	Y	Yes	Gemmatimonadetes	d__Bacteria;p__Gemmatimonadota;c__Gemmatimonadetes;o__KS3-K002;f__KS3-K002;g__;s__	N	4.12951	4.73025	389	78290	14544	64.42	3947	4129510	2021	10615.7	Bohai Sea M8, China	Coastal Sediment	39.6928N/120.6606E	k__Bacteria (UID2495)	2993	147	91	13	129	5	0	0	0	87.3	4.95	20	d__Bacteria;p__Gemmatimonadota;c__Gemmatimonadetes;o__KS3-K002;f__KS3-K002;g__;s__	N/A	N/A	N/A	N/A	N/A	GCA_011774835.1	95	d__Bacteria;p__Gemmatimonadota;c__Gemmatimonadetes;o__KS3-K002;f__KS3-K002;g__KS3-K002;s__KS3-K002 sp011774835	77.45	0.25	d__Bacteria;p__Gemmatimonadota;c__Gemmatimonadetes;o__KS3-K002;f__;g__;s__	taxonomic classification defined by topology and ANI	N/A	N/A	83.8
	M8-44_Bin_274	Group3	N	Yes	Gemmatimonadetes	d__Bacteria;p__Gemmatimonadota;c__Gemmatimonadetes;o__KS3-K002;f__JABDQB01;g__;s__	N	2.64848	3.49634	589	19632	4772	64.98	2894	2648477	2007	4496.6	Bohai Sea M8, China	Coastal Sediment	39.6928N/120.6606E	k__Bacteria (UID2495)	2993	147	91	36	107	4	0	0	0	75.75	3.3	50	d__Bacteria;p__Gemmatimonadota;c__Gemmatimonadetes;o__KS3-K002;f__JABDQB01;g__;s__	N/A	N/A	N/A	N/A	N/A	N/A	N/A	N/A	N/A	N/A	d__Bacteria;p__Gemmatimonadota;c__Gemmatimonadetes;o__KS3-K002;f__JABDQB01;g__;s__	taxonomic novelty determined using RED	N/A	N/A	64.4
	M8-44_Bin_290	Group2	Y	Yes	Gemmatimonadetes	d__Bacteria;p__Gemmatimonadota;c__Gemmatimonadetes;o__Gemmatimonadales;f__GWC2-71-9;g__WVYX01;s__	N	4.30686	4.40374	372	74805	17066	66.3	4099	4306858	2004	11577.6	Bohai Sea M8, China	Coastal Sediment	39.6928N/120.6606E	k__Bacteria (UID2495)	2993	147	91	2	143	2	0	0	0	97.8	2.2	0	d__Bacteria;p__Gemmatimonadota;c__Gemmatimonadetes;o__Gemmatimonadales;f__GWC2-71-9;g__WVYX01;s__	N/A	N/A	N/A	N/A	N/A	GCA_011772755.1	95	d__Bacteria;p__Gemmatimonadota;c__Gemmatimonadetes;o__Gemmatimonadales;f__GWC2-71-9;g__WVYX01;s__WVYX01 sp011772755	76.75	0.12	d__Bacteria;p__Gemmatimonadota;c__Gemmatimonadetes;o__Gemmatimonadales;f__GWC2-71-9;g__;s__	taxonomic classification defined by topology and ANI	N/A	N/A	89.36
	M8-44_Bin_318	Group4	Y	Yes	Gemmatimonadetes	d__Bacteria;p__Gemmatimonadota;c__Gemmatimonadetes;o__Longimicrobiales;f__UBA6960;g__SZUA-318;s__	N	5.25545	5.46589	709	81997	10100	68.18	4980	5255454	2002	7412.5	Bohai Sea M8, China	Coastal Sediment	39.6928N/120.6606E	k__Bacteria (UID2495)	2993	147	91	4	140	3	0	0	0	96.15	3.3	0	d__Bacteria;p__Gemmatimonadota;c__Gemmatimonadetes;o__Longimicrobiales;f__UBA6960;g__SZUA-318;s__	N/A	N/A	N/A	N/A	N/A	GCA_003248075.1	95	d__Bacteria;p__Gemmatimonadota;c__Gemmatimonadetes;o__Longimicrobiales;f__UBA6960;g__SZUA-318;s__SZUA-318 sp003248075	76.8	0.24	d__Bacteria;p__Gemmatimonadota;c__Gemmatimonadetes;o__Longimicrobiales;f__UBA6960;g__;s__	taxonomic classification defined by topology and ANI	N/A	N/A	83.96
	M8-44_Bin_319	Group3	N	Yes	Gemmatimonadetes	d__Bacteria;p__Gemmatimonadota;c__Gemmatimonadetes;o__KS3-K002;f__JABDQB01;g__;s__	N	4.20934	4.40307	423	59817	13850	66.48	3983	4209335	2002	9951.1	Bohai Sea M8, China	Coastal Sediment	39.6928N/120.6606E	k__Bacteria (UID2495)	2993	147	91	4	135	8	0	0	0	95.6	7.69	25	d__Bacteria;p__Gemmatimonadota;c__Gemmatimonadetes;o__KS3-K002;f__JABDQB01;g__;s__	N/A	N/A	N/A	N/A	N/A	N/A	N/A	N/A	N/A	N/A	d__Bacteria;p__Gemmatimonadota;c__Gemmatimonadetes;o__KS3-K002;f__JABDQB01;g__;s__	taxonomic novelty determined using RED	N/A	N/A	86.36
	M8-44_Bin_321	Group1	N	Yes	Gemmatimonadetes	d__Bacteria;p__Gemmatimonadota;c__Gemmatimonadetes;o__JACCXV01;f__;g__;s__	N	2.0316	2.76973	372	22973	6226	62.19	2364	2031600	2026	5461.3	Bohai Sea M8, China	Coastal Sediment	39.6928N/120.6606E	k__Bacteria (UID2495)	2993	147	91	41	104	2	0	0	0	73.35	0.61	100	d__Bacteria;p__Gemmatimonadota;c__Gemmatimonadetes;o__JACCXV01;f__;g__;s__	N/A	N/A	N/A	N/A	N/A	GCA_013696835.1	95	d__Bacteria;p__Gemmatimonadota;c__Gemmatimonadetes;o__JACCXV01;f__JACCXV01;g__JACCXV01;s__JACCXV01 sp013696835	74.99	0.03	d__Bacteria;p__Gemmatimonadota;c__Gemmatimonadetes;o__;f__;g__;s__	taxonomic classification defined by topology and ANI	N/A	N/A	62.4
	M8-44_Bin_322	Group4	N	Yes	Gemmatimonadetes	d__Bacteria;p__Gemmatimonadota;c__Gemmatimonadetes;o__Longimicrobiales;f__UBA6960;g__;s__	N	2.83446	3.97484	603	20405	5228	66.87	2911	2834459	2007	4700.6	Bohai Sea M8, China	Coastal Sediment	39.6928N/120.6606E	k__Bacteria (UID2495)	2993	147	91	34	112	1	0	0	0	71.31	1.1	0	d__Bacteria;p__Gemmatimonadota;c__Gemmatimonadetes;o__Longimicrobiales;f__UBA6960;g__;s__	N/A	N/A	N/A	N/A	N/A	N/A	N/A	N/A	N/A	N/A	d__Bacteria;p__Gemmatimonadota;c__Gemmatimonadetes;o__Longimicrobiales;f__UBA6960;g__;s__	taxonomic classification fully defined by topology	N/A	N/A	66.03
	M8-44_Bin_332	Group3	Y	Yes	Gemmatimonadetes	d__Bacteria;p__Gemmatimonadota;c__Gemmatimonadetes;o__KS3-K002;f__JABDQB01;g__JABDQB01;s__	N	3.32542	3.51859	288	107786	18798	65.75	3280	3325420	2015	11546.6	Bohai Sea M8, China	Coastal Sediment	39.6928N/120.6606E	k__Bacteria (UID2495)	2993	147	91	5	138	4	0	0	0	94.51	4.4	25	d__Bacteria;p__Gemmatimonadota;c__Gemmatimonadetes;o__KS3-K002;f__JABDQB01;g__JABDQB01;s__	N/A	N/A	N/A	N/A	N/A	GCA_013042495.1	95	d__Bacteria;p__Gemmatimonadota;c__Gemmatimonadetes;o__KS3-K002;f__JABDQB01;g__JABDQB01;s__JABDQB01 sp013042495	79.8	0.57	d__Bacteria;p__Gemmatimonadota;c__Gemmatimonadetes;o__KS3-K002;f__JABDQB01;g__;s__	taxonomic classification defined by topology and ANI	N/A	N/A	89.7
	M8-44_Bin_343	Group4	N	Yes	Gemmatimonadetes	d__Bacteria;p__Gemmatimonadota;c__Gemmatimonadetes;o__Longimicrobiales;f__UBA6960;g__;s__	N	5.30638	6.14805	782	54161	9032	67.8	5067	5306381	2000	6785.7	Bohai Sea M8, China	Coastal Sediment	39.6928N/120.6606E	k__Bacteria (UID2495)	2993	147	91	20	120	7	0	0	0	86.31	5.66	14.29	d__Bacteria;p__Gemmatimonadota;c__Gemmatimonadetes;o__Longimicrobiales;f__UBA6960;g__;s__	N/A	N/A	N/A	N/A	N/A	N/A	N/A	N/A	N/A	N/A	d__Bacteria;p__Gemmatimonadota;c__Gemmatimonadetes;o__Longimicrobiales;f__UBA6960;g__;s__	taxonomic classification fully defined by topology	N/A	N/A	76.14
	M8-44_Bin_353	Group2	Y	Yes	Gemmatimonadetes	d__Bacteria;p__Gemmatimonadota;c__Gemmatimonadetes;o__Gemmatimonadales;f__GWC2-71-9;g__WVYX01;s__	N	3.16549	3.31118	155	99760	35280	66.22	2990	3165486	2083	20422.5	Bohai Sea M8, China	Coastal Sediment	39.6928N/120.6606E	k__Bacteria (UID2495)	2993	147	91	10	135	2	0	0	0	95.6	2.2	0	d__Bacteria;p__Gemmatimonadota;c__Gemmatimonadetes;o__Gemmatimonadales;f__GWC2-71-9;g__WVYX01;s__	N/A	N/A	N/A	N/A	N/A	GCA_011772755.1	95	d__Bacteria;p__Gemmatimonadota;c__Gemmatimonadetes;o__Gemmatimonadales;f__GWC2-71-9;g__WVYX01;s__WVYX01 sp011772755	76.55	0.17	d__Bacteria;p__Gemmatimonadota;c__Gemmatimonadetes;o__Gemmatimonadales;f__GWC2-71-9;g__;s__	taxonomic classification defined by topology and ANI	N/A	N/A	87.53
	M8-44_Bin_360	Group3	N	Yes	Gemmatimonadetes	d__Bacteria;p__Gemmatimonadota;c__Gemmatimonadetes;o__KS3-K002;f__JABDQB01;g__JABDQB01;s__	N	2.80534	3.1167	346	72886	10619	66.81	2856	2805343	2006	8107.9	Bohai Sea M8, China	Coastal Sediment	39.6928N/120.6606E	k__Bacteria (UID2495)	2993	147	91	10	130	7	0	0	0	90.01	5.07	42.86	d__Bacteria;p__Gemmatimonadota;c__Gemmatimonadetes;o__KS3-K002;f__JABDQB01;g__JABDQB01;s__	N/A	N/A	N/A	N/A	N/A	GCA_013042495.1	95	d__Bacteria;p__Gemmatimonadota;c__Gemmatimonadetes;o__KS3-K002;f__JABDQB01;g__JABDQB01;s__JABDQB01 sp013042495	77.67	0.26	d__Bacteria;p__Gemmatimonadota;c__Gemmatimonadetes;o__KS3-K002;f__JABDQB01;g__;s__	taxonomic classification defined by topology and ANI	N/A	N/A	84.44
	M8-44_Bin_362	Group4	N	Yes	Gemmatimonadetes	d__Bacteria;p__Gemmatimonadota;c__Gemmatimonadetes;o__Longimicrobiales;f__UBA6960;g__JABDNZ01;s__	N	5.75808	5.82212	604	64685	15107	62.93	5216	5758079	2004	9533.2	Bohai Sea M8, China	Coastal Sediment	39.6928N/120.6606E	k__Bacteria (UID2495)	2993	147	91	1	141	5	0	0	0	98.9	5.49	0	d__Bacteria;p__Gemmatimonadota;c__Gemmatimonadetes;o__Longimicrobiales;f__UBA6960;g__JABDNZ01;s__	N/A	N/A	N/A	N/A	N/A	GCA_013043565.1	95	d__Bacteria;p__Gemmatimonadota;c__Gemmatimonadetes;o__Longimicrobiales;f__UBA6960;g__JABDNZ01;s__JABDNZ01 sp013043565	77.02	0.19	d__Bacteria;p__Gemmatimonadota;c__Gemmatimonadetes;o__Longimicrobiales;f__UBA6960;g__;s__	taxonomic classification defined by topology and ANI	N/A	N/A	89.68
	M8-44_Bin_84	Group3	N	Yes	Gemmatimonadetes	d__Bacteria;p__Gemmatimonadota;c__Gemmatimonadetes;o__KS3-K002;f__;g__;s__	N	2.03575	4.06662	509	17923	4372	65.23	2369	2035751	2001	3999.5	Bohai Sea M8, China	Coastal Sediment	39.6928N/120.6606E	k__Bacteria (UID2495)	2993	147	91	64	83	0	0	0	0	50.06	0	0	d__Bacteria;p__Gemmatimonadota;c__Gemmatimonadetes;o__KS3-K002;f__;g__;s__	N/A	N/A	N/A	N/A	N/A	N/A	N/A	N/A	N/A	N/A	d__Bacteria;p__Gemmatimonadota;c__Gemmatimonadetes;o__KS3-K002;f__;g__;s__	taxonomic novelty determined using RED	N/A	N/A	38.89
	M8-44_Bin_95	Group2	N	Yes	Gemmatimonadetes	d__Bacteria;p__Gemmatimonadota;c__Gemmatimonadetes;o__Gemmatimonadales;f__GWC2-71-9;g__WVYX01;s__	N	3.50096	3.91694	321	108376	22780	66.9	3418	3500965	2007	10906.4	Bohai Sea M8, China	Coastal Sediment	39.6928N/120.6606E	k__Bacteria (UID2495)	2993	147	91	18	115	14	0	0	0	89.38	7.74	14.29	d__Bacteria;p__Gemmatimonadota;c__Gemmatimonadetes;o__Gemmatimonadales;f__GWC2-71-9;g__WVYX01;s__	N/A	N/A	N/A	N/A	N/A	GCA_011772755.1	95	d__Bacteria;p__Gemmatimonadota;c__Gemmatimonadetes;o__Gemmatimonadales;f__GWC2-71-9;g__WVYX01;s__WVYX01 sp011772755	76.97	0.21	d__Bacteria;p__Gemmatimonadota;c__Gemmatimonadetes;o__Gemmatimonadales;f__GWC2-71-9;g__;s__	taxonomic classification defined by topology and ANI	N/A	N/A	77.33
	M8-58_Bin_102	Group3	N	Yes	Gemmatimonadetes	d__Bacteria;p__Gemmatimonadota;c__Gemmatimonadetes;o__KS3-K002;f__;g__;s__	N	2.28172	4.09131	563	33560	4316	64.71	2447	2281722	2000	4052.8	Bohai Sea M8, China	Coastal Sediment	39.6928N/120.6606E	k__Bacteria (UID2495)	2993	147	91	66	73	7	1	0	0	55.77	4.58	10	d__Bacteria;p__Gemmatimonadota;c__Gemmatimonadetes;o__KS3-K002;f__;g__;s__	N/A	N/A	N/A	N/A	N/A	N/A	N/A	N/A	N/A	N/A	d__Bacteria;p__Gemmatimonadota;c__Gemmatimonadetes;o__KS3-K002;f__;g__;s__	taxonomic novelty determined using RED	N/A	N/A	43.97
	M8-58_Bin_122	Group2	N	Yes	Gemmatimonadetes	d__Bacteria;p__Gemmatimonadota;c__Gemmatimonadetes;o__Gemmatimonadales;f__GWC2-71-9;g__WVYX01;s__	N	6.42832	7.13861	877	53581	10686	57.72	6391	6428317	2004	7329.9	Bohai Sea M8, China	Coastal Sediment	39.6928N/120.6606E	k__Bacteria (UID2495)	2993	147	91	11	129	7	0	0	0	90.05	6.14	0	d__Bacteria;p__Gemmatimonadota;c__Gemmatimonadetes;o__Gemmatimonadales;f__GWC2-71-9;g__WVYX01;s__	N/A	N/A	N/A	N/A	N/A	GCA_011772755.1	95	d__Bacteria;p__Gemmatimonadota;c__Gemmatimonadetes;o__Gemmatimonadales;f__GWC2-71-9;g__WVYX01;s__WVYX01 sp011772755	75.89	0.03	d__Bacteria;p__Gemmatimonadota;c__Gemmatimonadetes;o__Gemmatimonadales;f__GWC2-71-9;g__;s__	taxonomic classification defined by topology and ANI	N/A	N/A	83.4
	M8-58_Bin_130	Group2	N	Yes	Gemmatimonadetes	d__Bacteria;p__Gemmatimonadota;c__Gemmatimonadetes;o__Gemmatimonadales;f__GWC2-71-9;g__WVYX01;s__	N	3.30306	4.12934	743	43936	4796	61.23	3849	3303057	2007	4445.6	Bohai Sea M8, China	Coastal Sediment	39.6928N/120.6606E	k__Bacteria (UID2495)	2993	147	91	23	118	6	0	0	0	79.99	4.95	33.33	d__Bacteria;p__Gemmatimonadota;c__Gemmatimonadetes;o__Gemmatimonadales;f__GWC2-71-9;g__WVYX01;s__	N/A	N/A	N/A	N/A	N/A	GCA_011772755.1	95	d__Bacteria;p__Gemmatimonadota;c__Gemmatimonadetes;o__Gemmatimonadales;f__GWC2-71-9;g__WVYX01;s__WVYX01 sp011772755	76.28	0.05	d__Bacteria;p__Gemmatimonadota;c__Gemmatimonadetes;o__Gemmatimonadales;f__GWC2-71-9;g__;s__	taxonomic classification defined by topology and ANI	N/A	N/A	70.9
	M8-58_Bin_142	Group2	N	Yes	Gemmatimonadetes	d__Bacteria;p__Gemmatimonadota;c__Gemmatimonadetes;o__Gemmatimonadales;f__GWC2-71-9;g__;s__	N	3.488	5.1897	865	24707	4337	65.91	3792	3488000	2003	4032.4	Bohai Sea M8, China	Coastal Sediment	39.6928N/120.6606E	k__Bacteria (UID2495)	2993	147	91	41	100	6	0	0	0	67.21	3.43	0	d__Bacteria;p__Gemmatimonadota;c__Gemmatimonadetes;o__Gemmatimonadales;f__GWC2-71-9;g__;s__	N/A	N/A	N/A	N/A	N/A	N/A	N/A	N/A	N/A	N/A	d__Bacteria;p__Gemmatimonadota;c__Gemmatimonadetes;o__Gemmatimonadales;f__GWC2-71-9;g__;s__	taxonomic classification fully defined by topology	N/A	N/A	57.61
	M8-58_Bin_153	Group2	Y	Yes	Gemmatimonadetes	d__Bacteria;p__Gemmatimonadota;c__Gemmatimonadetes;o__Gemmatimonadales;f__GWC2-71-9;g__WVYX01;s__	Y	5.96278	6.59016	788	73800	11235	59.24	6027	5962776	2001	7567	Bohai Sea M8, China	Coastal Sediment	39.6928N/120.6606E	k__Bacteria (UID2495)	2993	147	91	11	129	7	0	0	0	90.48	4.95	0	d__Bacteria;p__Gemmatimonadota;c__Gemmatimonadetes;o__Gemmatimonadales;f__GWC2-71-9;g__WVYX01;s__	N/A	N/A	N/A	N/A	N/A	GCA_011772755.1	95	d__Bacteria;p__Gemmatimonadota;c__Gemmatimonadetes;o__Gemmatimonadales;f__GWC2-71-9;g__WVYX01;s__WVYX01 sp011772755	77.24	0.07	d__Bacteria;p__Gemmatimonadota;c__Gemmatimonadetes;o__Gemmatimonadales;f__GWC2-71-9;g__;s__	taxonomic classification defined by topology and ANI	N/A	N/A	82.27
	M8-58_Bin_155	Group1	N	Yes	Gemmatimonadetes	d__Bacteria;p__Gemmatimonadota;c__Gemmatimonadetes;o__JACCXV01;f__;g__;s__	N	1.89483	2.99389	403	25715	5325	62	2277	1894832	2000	4701.8	Bohai Sea M8, China	Coastal Sediment	39.6928N/120.6606E	k__Bacteria (UID2495)	2993	147	91	51	83	12	1	0	0	63.29	3.81	80	d__Bacteria;p__Gemmatimonadota;c__Gemmatimonadetes;o__JACCXV01;f__;g__;s__	N/A	N/A	N/A	N/A	N/A	GCA_013696835.1	95	d__Bacteria;p__Gemmatimonadota;c__Gemmatimonadetes;o__JACCXV01;f__JACCXV01;g__JACCXV01;s__JACCXV01 sp013696835	75.85	0.02	d__Bacteria;p__Gemmatimonadota;c__Gemmatimonadetes;o__;f__;g__;s__	taxonomic classification defined by topology and ANI	N/A	N/A	51.62
	M8-58_Bin_158	Group1	N	Yes	Gemmatimonadetes	d__Bacteria;p__Gemmatimonadota;c__Gemmatimonadetes;o__JACCXV01;f__;g__;s__	N	2.36725	2.58829	220	78413	17866	62.2	2515	2367247	2000	10760.2	Bohai Sea M8, China	Coastal Sediment	39.6928N/120.6606E	k__Bacteria (UID2495)	2993	147	91	12	129	6	0	0	0	91.46	5.68	33.33	d__Bacteria;p__Gemmatimonadota;c__Gemmatimonadetes;o__JACCXV01;f__;g__;s__	N/A	N/A	N/A	N/A	N/A	GCA_013696835.1	95	d__Bacteria;p__Gemmatimonadota;c__Gemmatimonadetes;o__JACCXV01;f__JACCXV01;g__JACCXV01;s__JACCXV01 sp013696835	75.09	0.04	d__Bacteria;p__Gemmatimonadota;c__Gemmatimonadetes;o__;f__;g__;s__	taxonomic classification defined by topology and ANI	N/A	N/A	85.21
	M8-58_Bin_19	Group3	N	Yes	Gemmatimonadetes	d__Bacteria;p__Gemmatimonadota;c__Gemmatimonadetes;o__KS3-K002;f__KS3-K002;g__KS3-K002;s__	N	6.18606	7.05125	760	68924	10834	63.17	5982	6186064	2004	8139.6	Bohai Sea M8, China	Coastal Sediment	39.6928N/120.6606E	k__Bacteria (UID2495)	2993	147	91	15	127	5	0	0	0	87.73	5.49	20	d__Bacteria;p__Gemmatimonadota;c__Gemmatimonadetes;o__KS3-K002;f__KS3-K002;g__KS3-K002;s__	N/A	N/A	N/A	N/A	N/A	GCA_011774835.1	95	d__Bacteria;p__Gemmatimonadota;c__Gemmatimonadetes;o__KS3-K002;f__KS3-K002;g__KS3-K002;s__KS3-K002 sp011774835	76.58	0.18	d__Bacteria;p__Gemmatimonadota;c__Gemmatimonadetes;o__KS3-K002;f__;g__;s__	taxonomic classification defined by topology and ANI	N/A	N/A	74.31
	M8-58_Bin_213	Group2	Y	Yes	Gemmatimonadetes	d__Bacteria;p__Gemmatimonadota;c__Gemmatimonadetes;o__Gemmatimonadales;f__GWC2-71-9;g__WVYX01;s__	Y	2.87467	2.98978	196	92361	26959	67.76	2782	2874673	2038	14666.7	Bohai Sea M8, China	Coastal Sediment	39.6928N/120.6606E	k__Bacteria (UID2495)	2993	147	91	4	140	3	0	0	0	96.15	3.3	0	d__Bacteria;p__Gemmatimonadota;c__Gemmatimonadetes;o__Gemmatimonadales;f__GWC2-71-9;g__WVYX01;s__	N/A	N/A	N/A	N/A	N/A	GCA_011772755.1	95	d__Bacteria;p__Gemmatimonadota;c__Gemmatimonadetes;o__Gemmatimonadales;f__GWC2-71-9;g__WVYX01;s__WVYX01 sp011772755	77.07	0.26	d__Bacteria;p__Gemmatimonadota;c__Gemmatimonadetes;o__Gemmatimonadales;f__GWC2-71-9;g__;s__	taxonomic classification defined by topology and ANI	N/A	N/A	87.45
	M8-58_Bin_228	Group4	Y	Yes	Gemmatimonadetes	d__Bacteria;p__Gemmatimonadota;c__Gemmatimonadetes;o__Longimicrobiales;f__UBA6960;g__UBA822;s__	N	3.83791	3.92424	253	112636	30910	64.12	3573	3837910	2016	15169.6	Bohai Sea M8, China	Coastal Sediment	39.6928N/120.6606E	k__Bacteria (UID2495)	2993	147	91	2	140	5	0	0	0	97.8	4.95	0	d__Bacteria;p__Gemmatimonadota;c__Gemmatimonadetes;o__Longimicrobiales;f__UBA6960;g__UBA822;s__	N/A	N/A	N/A	N/A	N/A	N/A	N/A	N/A	N/A	N/A	d__Bacteria;p__Gemmatimonadota;c__Gemmatimonadetes;o__Longimicrobiales;f__UBA6960;g__;s__	taxonomic novelty determined using RED	N/A	N/A	87.14
	M8-58_Bin_23	Group2	N	Yes	Gemmatimonadetes	d__Bacteria;p__Gemmatimonadota;c__Gemmatimonadetes;o__Gemmatimonadales;f__GWC2-71-9;g__WVYX01;s__	N	3.25694	5.5942	524	37454	8246	66.68	3375	3256943	2001	6215.5	Bohai Sea M8, China	Coastal Sediment	39.6928N/120.6606E	k__Bacteria (UID2495)	2993	147	91	56	82	8	1	0	0	58.22	1.42	90.91	d__Bacteria;p__Gemmatimonadota;c__Gemmatimonadetes;o__Gemmatimonadales;f__GWC2-71-9;g__WVYX01;s__	N/A	N/A	N/A	N/A	N/A	GCA_011772755.1	95	d__Bacteria;p__Gemmatimonadota;c__Gemmatimonadetes;o__Gemmatimonadales;f__GWC2-71-9;g__WVYX01;s__WVYX01 sp011772755	76.57	0.18	d__Bacteria;p__Gemmatimonadota;c__Gemmatimonadetes;o__Gemmatimonadales;f__GWC2-71-9;g__;s__	taxonomic classification defined by topology and ANI	N/A	N/A	53.5
	M8-58_Bin_269	Group3	N	Yes	Gemmatimonadetes	d__Bacteria;p__Gemmatimonadota;c__Gemmatimonadetes;o__KS3-K002;f__JABDQB01;g__JABDQB01;s__	N	1.9528	3.0982	495	14353	4192	65.75	2229	1952795	2012	3945	Bohai Sea M8, China	Coastal Sediment	39.6928N/120.6606E	k__Bacteria (UID2495)	2993	147	91	47	97	3	0	0	0	63.03	2.75	33.33	d__Bacteria;p__Gemmatimonadota;c__Gemmatimonadetes;o__KS3-K002;f__JABDQB01;g__JABDQB01;s__	N/A	N/A	N/A	N/A	N/A	GCA_013042495.1	95	d__Bacteria;p__Gemmatimonadota;c__Gemmatimonadetes;o__KS3-K002;f__JABDQB01;g__JABDQB01;s__JABDQB01 sp013042495	79.22	0.48	d__Bacteria;p__Gemmatimonadota;c__Gemmatimonadetes;o__KS3-K002;f__JABDQB01;g__;s__	taxonomic classification defined by topology and ANI	N/A	N/A	55.07
	M8-58_Bin_26	Group2	N	Yes	Gemmatimonadetes	d__Bacteria;p__Gemmatimonadota;c__Gemmatimonadetes;o__Gemmatimonadales;f__GWC2-71-9;g__WVYX01;s__	N	3.0157	5.86712	776	16721	4099	64.71	3253	3015702	2000	3886.2	Bohai Sea M8, China	Coastal Sediment	39.6928N/120.6606E	k__Bacteria (UID2495)	2993	147	91	71	68	7	1	0	0	51.4	9.89	10	d__Bacteria;p__Gemmatimonadota;c__Gemmatimonadetes;o__Gemmatimonadales;f__GWC2-71-9;g__WVYX01;s__	N/A	N/A	N/A	N/A	N/A	GCA_011772755.1	95	d__Bacteria;p__Gemmatimonadota;c__Gemmatimonadetes;o__Gemmatimonadales;f__GWC2-71-9;g__WVYX01;s__WVYX01 sp011772755	75.63	0.05	d__Bacteria;p__Gemmatimonadota;c__Gemmatimonadetes;o__Gemmatimonadales;f__GWC2-71-9;g__;s__	taxonomic classification defined by topology and ANI	N/A	N/A	39.17
	M8-58_Bin_273	Group3	N	Yes	Gemmatimonadetes	d__Bacteria;p__Gemmatimonadota;c__Gemmatimonadetes;o__KS3-K002;f__JABDQB01;g__;s__	N	4.25666	4.42158	286	79379	26413	66.46	3951	4256655	2021	14883.4	Bohai Sea M8, China	Coastal Sediment	39.6928N/120.6606E	k__Bacteria (UID2495)	2993	147	91	5	136	6	0	0	0	96.27	5.59	16.67	d__Bacteria;p__Gemmatimonadota;c__Gemmatimonadetes;o__KS3-K002;f__JABDQB01;g__;s__	N/A	N/A	N/A	N/A	N/A	N/A	N/A	N/A	N/A	N/A	d__Bacteria;p__Gemmatimonadota;c__Gemmatimonadetes;o__KS3-K002;f__JABDQB01;g__;s__	taxonomic novelty determined using RED	N/A	N/A	88.72
	M8-58_Bin_274	Group3	Y	Yes	Gemmatimonadetes	d__Bacteria;p__Gemmatimonadota;c__Gemmatimonadetes;o__KS3-K002;f__JABDQB01;g__JABDQB01;s__	N	3.53628	3.94851	416	50204	11741	65.82	3413	3536283	2000	8500.7	Bohai Sea M8, China	Coastal Sediment	39.6928N/120.6606E	k__Bacteria (UID2495)	2993	147	91	13	132	2	0	0	0	89.56	2.2	0	d__Bacteria;p__Gemmatimonadota;c__Gemmatimonadetes;o__KS3-K002;f__JABDQB01;g__JABDQB01;s__	N/A	N/A	N/A	N/A	N/A	GCA_013042495.1	95	d__Bacteria;p__Gemmatimonadota;c__Gemmatimonadetes;o__KS3-K002;f__JABDQB01;g__JABDQB01;s__JABDQB01 sp013042495	78.16	0.33	d__Bacteria;p__Gemmatimonadota;c__Gemmatimonadetes;o__KS3-K002;f__JABDQB01;g__;s__	taxonomic classification defined by topology and ANI	N/A	N/A	84.81
	M8-58_Bin_283	Group3	N	Yes	Gemmatimonadetes	d__Bacteria;p__Gemmatimonadota;c__Gemmatimonadetes;o__KS3-K002;f__KS3-K002;g__KS3-K002;s__	N	3.09633	4.38946	720	16273	4703	64.33	3205	3096327	2001	4300.5	Bohai Sea M8, China	Coastal Sediment	39.6928N/120.6606E	k__Bacteria (UID2495)	2993	147	91	46	93	8	0	0	0	70.54	7.79	0	d__Bacteria;p__Gemmatimonadota;c__Gemmatimonadetes;o__KS3-K002;f__KS3-K002;g__KS3-K002;s__	N/A	N/A	N/A	N/A	N/A	GCA_011774835.1	95	d__Bacteria;p__Gemmatimonadota;c__Gemmatimonadetes;o__KS3-K002;f__KS3-K002;g__KS3-K002;s__KS3-K002 sp011774835	77.61	0.27	d__Bacteria;p__Gemmatimonadota;c__Gemmatimonadetes;o__KS3-K002;f__;g__;s__	taxonomic classification defined by topology and ANI	N/A	N/A	62.52
	M8-58_Bin_286	Group3	Y	Yes	Gemmatimonadetes	d__Bacteria;p__Gemmatimonadota;c__Gemmatimonadetes;o__KS3-K002;f__JABDQB01;g__;s__	N	3.59079	4.07581	479	74432	9796	65.08	3524	3590786	2013	7496.4	Bohai Sea M8, China	Coastal Sediment	39.6928N/120.6606E	k__Bacteria (UID2495)	2993	147	91	13	130	4	0	0	0	88.1	3.4	0	d__Bacteria;p__Gemmatimonadota;c__Gemmatimonadetes;o__KS3-K002;f__JABDQB01;g__;s__	N/A	N/A	N/A	N/A	N/A	N/A	N/A	N/A	N/A	N/A	d__Bacteria;p__Gemmatimonadota;c__Gemmatimonadetes;o__KS3-K002;f__JABDQB01;g__;s__	taxonomic novelty determined using RED	N/A	N/A	82.69
	M8-58_Bin_303	Group3	N	Yes	Gemmatimonadetes	d__Bacteria;p__Gemmatimonadota;c__Gemmatimonadetes;o__KS3-K002;f__KS3-K002;g__;s__	N	5.64421	6.38052	513	128321	17579	63.05	5211	5644209	2016	11002.4	Bohai Sea M8, China	Coastal Sediment	39.6928N/120.6606E	k__Bacteria (UID2495)	2993	147	91	11	131	4	1	0	0	88.46	6.04	14.29	d__Bacteria;p__Gemmatimonadota;c__Gemmatimonadetes;o__KS3-K002;f__KS3-K002;g__;s__	N/A	N/A	N/A	N/A	N/A	GCA_011774835.1	95	d__Bacteria;p__Gemmatimonadota;c__Gemmatimonadetes;o__KS3-K002;f__KS3-K002;g__KS3-K002;s__KS3-K002 sp011774835	76.86	0.19	d__Bacteria;p__Gemmatimonadota;c__Gemmatimonadetes;o__KS3-K002;f__;g__;s__	taxonomic classification defined by topology and ANI	N/A	N/A	83.76
	M8-58_Bin_309	Group3	Y	Yes	Gemmatimonadetes	d__Bacteria;p__Gemmatimonadota;c__Gemmatimonadetes;o__KS3-K002;f__JABDQB01;g__;s__	N	3.43216	3.94909	307	92903	16556	66.11	3467	3432156	2073	11179.7	Bohai Sea M8, China	Coastal Sediment	39.6928N/120.6606E	k__Bacteria (UID2495)	2993	147	91	20	124	3	0	0	0	86.91	1.75	66.67	d__Bacteria;p__Gemmatimonadota;c__Gemmatimonadetes;o__KS3-K002;f__JABDQB01;g__;s__	N/A	N/A	N/A	N/A	N/A	N/A	N/A	N/A	N/A	N/A	d__Bacteria;p__Gemmatimonadota;c__Gemmatimonadetes;o__KS3-K002;f__JABDQB01;g__;s__	taxonomic novelty determined using RED	N/A	N/A	77.63
	M8-58_Bin_324	Group1	Y	Yes	Gemmatimonadetes	d__Bacteria;p__Gemmatimonadota;c__Gemmatimonadetes;o__JACCXV01;f__;g__;s__	N	2.34079	2.72439	221	60003	17868	62	2484	2340792	2030	10591.8	Bohai Sea M8, China	Coastal Sediment	39.6928N/120.6606E	k__Bacteria (UID2495)	2993	147	91	17	125	5	0	0	0	85.92	2.58	20	d__Bacteria;p__Gemmatimonadota;c__Gemmatimonadetes;o__JACCXV01;f__;g__;s__	N/A	N/A	N/A	N/A	N/A	GCA_013696835.1	95	d__Bacteria;p__Gemmatimonadota;c__Gemmatimonadetes;o__JACCXV01;f__JACCXV01;g__JACCXV01;s__JACCXV01 sp013696835	75.75	0.03	d__Bacteria;p__Gemmatimonadota;c__Gemmatimonadetes;o__;f__;g__;s__	taxonomic classification defined by topology and ANI	N/A	N/A	77.82
	M8-58_Bin_338	Group2	N	Yes	Gemmatimonadetes	d__Bacteria;p__Gemmatimonadota;c__Gemmatimonadetes;o__Gemmatimonadales;f__GWC2-71-9;g__WVYX01;s__	N	5.44493	5.93389	574	80810	13833	62.79	5089	5444933	2025	9485.9	Bohai Sea M8, China	Coastal Sediment	39.6928N/120.6606E	k__Bacteria (UID2495)	2993	147	91	9	126	12	0	0	0	91.76	5.19	33.33	d__Bacteria;p__Gemmatimonadota;c__Gemmatimonadetes;o__Gemmatimonadales;f__GWC2-71-9;g__WVYX01;s__	N/A	N/A	N/A	N/A	N/A	GCA_011772755.1	95	d__Bacteria;p__Gemmatimonadota;c__Gemmatimonadetes;o__Gemmatimonadales;f__GWC2-71-9;g__WVYX01;s__WVYX01 sp011772755	75.77	0.07	d__Bacteria;p__Gemmatimonadota;c__Gemmatimonadetes;o__Gemmatimonadales;f__GWC2-71-9;g__;s__	taxonomic classification defined by topology and ANI	N/A	N/A	84.47
	M8-58_Bin_343	Group1	Y	Yes	Gemmatimonadetes	d__Bacteria;p__Gemmatimonadota;c__Gemmatimonadetes;o__JACCXV01;f__;g__;s__	N	2.43675	2.76495	228	66927	18380	62.06	2624	2436750	2003	10687.5	Bohai Sea M8, China	Coastal Sediment	39.6928N/120.6606E	k__Bacteria (UID2495)	2993	147	91	27	116	4	0	0	0	88.13	4.4	0	d__Bacteria;p__Gemmatimonadota;c__Gemmatimonadetes;o__JACCXV01;f__;g__;s__	N/A	N/A	N/A	N/A	N/A	GCA_013696835.1	95	d__Bacteria;p__Gemmatimonadota;c__Gemmatimonadetes;o__JACCXV01;f__JACCXV01;g__JACCXV01;s__JACCXV01 sp013696835	75.62	0.03	d__Bacteria;p__Gemmatimonadota;c__Gemmatimonadetes;o__;f__;g__;s__	taxonomic classification defined by topology and ANI	N/A	N/A	76.59
	M8-58_Bin_346	Group3	Y	Yes	Gemmatimonadetes	d__Bacteria;p__Gemmatimonadota;c__Gemmatimonadetes;o__KS3-K002;f__KS3-K002;g__KS3-K002;s__	N	4.19973	4.49939	277	80993	20207	64.43	3881	4199729	2171	15161.5	Bohai Sea M8, China	Coastal Sediment	39.6928N/120.6606E	k__Bacteria (UID2495)	2993	147	91	7	136	4	0	0	0	93.34	4.4	0	d__Bacteria;p__Gemmatimonadota;c__Gemmatimonadetes;o__KS3-K002;f__KS3-K002;g__KS3-K002;s__	N/A	N/A	N/A	N/A	N/A	GCA_011774835.1	95	d__Bacteria;p__Gemmatimonadota;c__Gemmatimonadetes;o__KS3-K002;f__KS3-K002;g__KS3-K002;s__KS3-K002 sp011774835	77.66	0.27	d__Bacteria;p__Gemmatimonadota;c__Gemmatimonadetes;o__KS3-K002;f__;g__;s__	taxonomic classification defined by topology and ANI	N/A	N/A	85.75
	M8-58_Bin_359	Group2	Y	Yes	Gemmatimonadetes	d__Bacteria;p__Gemmatimonadota;c__Gemmatimonadetes;o__Gemmatimonadales;f__GWC2-71-9;g__WVYX01;s__	N	3.1643	3.6662	366	45706	12058	64.12	3271	3164297	2015	8645.6	Bohai Sea M8, China	Coastal Sediment	39.6928N/120.6606E	k__Bacteria (UID2495)	2993	147	91	18	127	2	0	0	0	86.31	2.2	0	d__Bacteria;p__Gemmatimonadota;c__Gemmatimonadetes;o__Gemmatimonadales;f__GWC2-71-9;g__WVYX01;s__	N/A	N/A	N/A	N/A	N/A	GCA_011772755.1	95	d__Bacteria;p__Gemmatimonadota;c__Gemmatimonadetes;o__Gemmatimonadales;f__GWC2-71-9;g__WVYX01;s__WVYX01 sp011772755	76.17	0.07	d__Bacteria;p__Gemmatimonadota;c__Gemmatimonadetes;o__Gemmatimonadales;f__GWC2-71-9;g__;s__	taxonomic classification defined by topology and ANI	N/A	N/A	80.78
	M8-58_Bin_366	Group3	Y	Yes	Gemmatimonadetes	d__Bacteria;p__Gemmatimonadota;c__Gemmatimonadetes;o__KS3-K002;f__KS3-K002;g__;s__	N	2.48398	3.01636	344	58052	9330	65.28	2503	2483975	2011	7220.9	Bohai Sea M8, China	Coastal Sediment	39.6928N/120.6606E	k__Bacteria (UID2495)	2993	147	91	19	127	1	0	0	0	82.35	1.1	0	d__Bacteria;p__Gemmatimonadota;c__Gemmatimonadetes;o__KS3-K002;f__KS3-K002;g__;s__	N/A	N/A	N/A	N/A	N/A	GCA_011774835.1	95	d__Bacteria;p__Gemmatimonadota;c__Gemmatimonadetes;o__KS3-K002;f__KS3-K002;g__KS3-K002;s__KS3-K002 sp011774835	78.15	0.31	d__Bacteria;p__Gemmatimonadota;c__Gemmatimonadetes;o__KS3-K002;f__;g__;s__	taxonomic classification defined by topology and ANI	N/A	N/A	75.14
	M8-58_Bin_36	Group2	N	Yes	Gemmatimonadetes	d__Bacteria;p__Gemmatimonadota;c__Gemmatimonadetes;o__Gemmatimonadales;f__GWC2-71-9;g__WVYX01;s__	N	2.79782	4.89642	123	82600	26564	62.81	2642	2797816	4253	22746.5	Bohai Sea M8, China	Coastal Sediment	39.6928N/120.6606E	k__Bacteria (UID2495)	2993	147	91	61	84	2	0	0	0	57.14	2.2	0	d__Bacteria;p__Gemmatimonadota;c__Gemmatimonadetes;o__Gemmatimonadales;f__GWC2-71-9;g__WVYX01;s__	N/A	N/A	N/A	N/A	N/A	GCA_011772755.1	95	d__Bacteria;p__Gemmatimonadota;c__Gemmatimonadetes;o__Gemmatimonadales;f__GWC2-71-9;g__WVYX01;s__WVYX01 sp011772755	76.19	0.05	d__Bacteria;p__Gemmatimonadota;c__Gemmatimonadetes;o__Gemmatimonadales;f__GWC2-71-9;g__;s__	taxonomic classification defined by topology and ANI	N/A	N/A	52.07
	M8-58_Bin_370	Group3	N	Yes	Gemmatimonadetes	d__Bacteria;p__Gemmatimonadota;c__Gemmatimonadetes;o__KS3-K002;f__KS3-K002;g__KS3-K002;s__	N	3.63975	4.30128	608	36109	7204	64.22	3691	3639746	2029	5986.4	Bohai Sea M8, China	Coastal Sediment	39.6928N/120.6606E	k__Bacteria (UID2495)	2993	147	91	17	123	7	0	0	0	84.62	5.14	0	d__Bacteria;p__Gemmatimonadota;c__Gemmatimonadetes;o__KS3-K002;f__KS3-K002;g__KS3-K002;s__	N/A	N/A	N/A	N/A	N/A	GCA_011774835.1	95	d__Bacteria;p__Gemmatimonadota;c__Gemmatimonadetes;o__KS3-K002;f__KS3-K002;g__KS3-K002;s__KS3-K002 sp011774835	78.51	0.34	d__Bacteria;p__Gemmatimonadota;c__Gemmatimonadetes;o__KS3-K002;f__;g__;s__	taxonomic classification defined by topology and ANI	N/A	N/A	79.71
	M8-58_Bin_372	Group3	N	Yes	Gemmatimonadetes	d__Bacteria;p__Gemmatimonadota;c__Gemmatimonadetes;o__KS3-K002;f__JABDQB01;g__;s__	N	2.13404	4.2183	505	21730	4743	65.38	2344	2134038	2005	4225.8	Bohai Sea M8, China	Coastal Sediment	39.6928N/120.6606E	k__Bacteria (UID2495)	2993	147	91	65	79	3	0	0	0	50.59	1.65	0	d__Bacteria;p__Gemmatimonadota;c__Gemmatimonadetes;o__KS3-K002;f__JABDQB01;g__;s__	N/A	N/A	N/A	N/A	N/A	N/A	N/A	N/A	N/A	N/A	d__Bacteria;p__Gemmatimonadota;c__Gemmatimonadetes;o__KS3-K002;f__JABDQB01;g__;s__	taxonomic novelty determined using RED	N/A	N/A	45.38
	M8-58_Bin_394	Group3	Y	Yes	Gemmatimonadetes	d__Bacteria;p__Gemmatimonadota;c__Gemmatimonadetes;o__KS3-K002;f__JABDQB01;g__JABDQB01;s__	Y	2.80216	2.94809	114	150063	43047	65.81	2697	2802164	2068	24580.4	Bohai Sea M8, China	Coastal Sediment	39.6928N/120.6606E	k__Bacteria (UID2495)	2993	147	91	5	138	4	0	0	0	95.05	4.4	25	d__Bacteria;p__Gemmatimonadota;c__Gemmatimonadetes;o__KS3-K002;f__JABDQB01;g__JABDQB01;s__	N/A	N/A	N/A	N/A	N/A	GCA_013042495.1	95	d__Bacteria;p__Gemmatimonadota;c__Gemmatimonadetes;o__KS3-K002;f__JABDQB01;g__JABDQB01;s__JABDQB01 sp013042495	76.75	0.12	d__Bacteria;p__Gemmatimonadota;c__Gemmatimonadetes;o__KS3-K002;f__JABDQB01;g__;s__	taxonomic classification defined by topology and ANI	N/A	N/A	86.02
	M8-58_Bin_422	Group3	N	Yes	Gemmatimonadetes	d__Bacteria;p__Gemmatimonadota;c__Gemmatimonadetes;o__KS3-K002;f__KS3-K002;g__KS3-K002;s__	N	4.36902	4.88159	321	81375	20513	61.83	4055	4369024	2025	13610.7	Bohai Sea M8, China	Coastal Sediment	39.6928N/120.6606E	k__Bacteria (UID2495)	2993	147	91	11	130	6	0	0	0	89.5	5.49	16.67	d__Bacteria;p__Gemmatimonadota;c__Gemmatimonadetes;o__KS3-K002;f__KS3-K002;g__KS3-K002;s__	N/A	N/A	N/A	N/A	N/A	GCA_011774835.1	95	d__Bacteria;p__Gemmatimonadota;c__Gemmatimonadetes;o__KS3-K002;f__KS3-K002;g__KS3-K002;s__KS3-K002 sp011774835	76.55	0.17	d__Bacteria;p__Gemmatimonadota;c__Gemmatimonadetes;o__KS3-K002;f__;g__;s__	taxonomic classification defined by topology and ANI	N/A	N/A	83.36
	M8-58_Bin_425	Group4	Y	Yes	Gemmatimonadetes	d__Bacteria;p__Gemmatimonadota;c__Gemmatimonadetes;o__Longimicrobiales;f__UBA6960;g__SZUA-318;s__	N	5.67241	5.83281	499	84143	18962	68.14	5135	5672410	2028	11367.6	Bohai Sea M8, China	Coastal Sediment	39.6928N/120.6606E	k__Bacteria (UID2495)	2993	147	91	3	142	2	0	0	0	97.25	2.2	0	d__Bacteria;p__Gemmatimonadota;c__Gemmatimonadetes;o__Longimicrobiales;f__UBA6960;g__SZUA-318;s__	N/A	N/A	N/A	N/A	N/A	GCA_003248075.1	95	d__Bacteria;p__Gemmatimonadota;c__Gemmatimonadetes;o__Longimicrobiales;f__UBA6960;g__SZUA-318;s__SZUA-318 sp003248075	77.1	0.22	d__Bacteria;p__Gemmatimonadota;c__Gemmatimonadetes;o__Longimicrobiales;f__UBA6960;g__;s__	taxonomic classification defined by topology and ANI	N/A	N/A	84.14
	M8-58_Bin_427	Group2	Y	Yes	Gemmatimonadetes	d__Bacteria;p__Gemmatimonadota;c__Gemmatimonadetes;o__Gemmatimonadales;f__GWC2-71-9;g__WVYX01;s__	N	4.60228	4.65346	193	332170	48648	66.25	4188	4602276	2211	23846	Bohai Sea M8, China	Coastal Sediment	39.6928N/120.6606E	k__Bacteria (UID2495)	2993	147	91	1	144	2	0	0	0	98.9	2.2	0	d__Bacteria;p__Gemmatimonadota;c__Gemmatimonadetes;o__Gemmatimonadales;f__GWC2-71-9;g__WVYX01;s__	N/A	N/A	N/A	N/A	N/A	GCA_011772755.1	95	d__Bacteria;p__Gemmatimonadota;c__Gemmatimonadetes;o__Gemmatimonadales;f__GWC2-71-9;g__WVYX01;s__WVYX01 sp011772755	76.71	0.13	d__Bacteria;p__Gemmatimonadota;c__Gemmatimonadetes;o__Gemmatimonadales;f__GWC2-71-9;g__;s__	taxonomic classification defined by topology and ANI	N/A	N/A	93.51
	M8-58_Bin_431	Group4	Y	Yes	Gemmatimonadetes	d__Bacteria;p__Gemmatimonadota;c__Gemmatimonadetes;o__Longimicrobiales;f__UBA6960;g__;s__	N	6.30786	6.41369	354	198898	33437	67.59	5532	6307863	2009	17818.8	Bohai Sea M8, China	Coastal Sediment	39.6928N/120.6606E	k__Bacteria (UID2495)	2993	147	91	2	140	5	0	0	0	98.35	3.91	40	d__Bacteria;p__Gemmatimonadota;c__Gemmatimonadetes;o__Longimicrobiales;f__UBA6960;g__;s__	N/A	N/A	N/A	N/A	N/A	N/A	N/A	N/A	N/A	N/A	d__Bacteria;p__Gemmatimonadota;c__Gemmatimonadetes;o__Longimicrobiales;f__UBA6960;g__;s__	taxonomic classification fully defined by topology	N/A	N/A	87.35
	M8-58_Bin_433	Group3	N	Yes	Gemmatimonadetes	d__Bacteria;p__Gemmatimonadota;c__Gemmatimonadetes;o__KS3-K002;f__JABDQB01;g__;s__	N	3.20029	3.34758	147	95615	42775	65	3012	3200291	2049	21770.7	Bohai Sea M8, China	Coastal Sediment	39.6928N/120.6606E	k__Bacteria (UID2495)	2993	147	91	4	138	4	1	0	0	95.6	6.04	14.29	d__Bacteria;p__Gemmatimonadota;c__Gemmatimonadetes;o__KS3-K002;f__JABDQB01;g__;s__	N/A	N/A	N/A	N/A	N/A	N/A	N/A	N/A	N/A	N/A	d__Bacteria;p__Gemmatimonadota;c__Gemmatimonadetes;o__KS3-K002;f__JABDQB01;g__;s__	taxonomic novelty determined using RED	N/A	N/A	87.89
	M8-58_Bin_437	Group3	N	Yes	Gemmatimonadetes	d__Bacteria;p__Gemmatimonadota;c__Gemmatimonadetes;o__KS3-K002;f__JABDQB01;g__JABDQB01;s__	N	2.48264	2.93629	417	34513	7366	66.96	2645	2482637	2032	5953.6	Bohai Sea M8, China	Coastal Sediment	39.6928N/120.6606E	k__Bacteria (UID2495)	2993	147	91	15	122	10	0	0	0	84.55	5.53	40	d__Bacteria;p__Gemmatimonadota;c__Gemmatimonadetes;o__KS3-K002;f__JABDQB01;g__JABDQB01;s__	N/A	N/A	N/A	N/A	N/A	GCA_013042495.1	95	d__Bacteria;p__Gemmatimonadota;c__Gemmatimonadetes;o__KS3-K002;f__JABDQB01;g__JABDQB01;s__JABDQB01 sp013042495	77.72	0.22	d__Bacteria;p__Gemmatimonadota;c__Gemmatimonadetes;o__KS3-K002;f__JABDQB01;g__;s__	taxonomic classification defined by topology and ANI	N/A	N/A	77.33
	M8-58_Bin_455	Group2	N	Yes	Gemmatimonadetes	d__Bacteria;p__Gemmatimonadota;c__Gemmatimonadetes;o__Gemmatimonadales;f__GWC2-71-9;g__WVYX01;s__	N	2.06379	3.63024	537	12856	4105	66.23	2337	2063792	2006	3843.2	Bohai Sea M8, China	Coastal Sediment	39.6928N/120.6606E	k__Bacteria (UID2495)	2993	147	91	61	85	1	0	0	0	56.85	1.1	0	d__Bacteria;p__Gemmatimonadota;c__Gemmatimonadetes;o__Gemmatimonadales;f__GWC2-71-9;g__WVYX01;s__	N/A	N/A	N/A	N/A	N/A	GCA_011772755.1	95	d__Bacteria;p__Gemmatimonadota;c__Gemmatimonadetes;o__Gemmatimonadales;f__GWC2-71-9;g__WVYX01;s__WVYX01 sp011772755	76.77	0.18	d__Bacteria;p__Gemmatimonadota;c__Gemmatimonadetes;o__Gemmatimonadales;f__GWC2-71-9;g__;s__	taxonomic classification defined by topology and ANI	N/A	N/A	48.72
	M8-58_Bin_458	Group2	Y	Yes	Gemmatimonadetes	d__Bacteria;p__Gemmatimonadota;c__Gemmatimonadetes;o__Gemmatimonadales;f__GWC2-71-9;g__WVYX01;s__	N	3.52692	3.68925	128	202844	58094	65.9	3283	3526921	2043	27554.1	Bohai Sea M8, China	Coastal Sediment	39.6928N/120.6606E	k__Bacteria (UID2495)	2993	147	91	4	141	2	0	0	0	95.6	2.2	0	d__Bacteria;p__Gemmatimonadota;c__Gemmatimonadetes;o__Gemmatimonadales;f__GWC2-71-9;g__WVYX01;s__	N/A	N/A	N/A	N/A	N/A	GCA_011772755.1	95	d__Bacteria;p__Gemmatimonadota;c__Gemmatimonadetes;o__Gemmatimonadales;f__GWC2-71-9;g__WVYX01;s__WVYX01 sp011772755	76.64	0.13	d__Bacteria;p__Gemmatimonadota;c__Gemmatimonadetes;o__Gemmatimonadales;f__GWC2-71-9;g__;s__	taxonomic classification defined by topology and ANI	N/A	N/A	89.5
	M8-58_Bin_459	Group2	Y	Yes	Gemmatimonadetes	d__Bacteria;p__Gemmatimonadota;c__Gemmatimonadetes;o__Gemmatimonadales;f__GWC2-71-9;g__WVYX01;s__	N	5.55019	6.39054	376	94413	23899	64.08	5062	5550187	2101	14761.1	Bohai Sea M8, China	Coastal Sediment	39.6928N/120.6606E	k__Bacteria (UID2495)	2993	147	91	30	112	5	0	0	0	86.85	4.95	20	d__Bacteria;p__Gemmatimonadota;c__Gemmatimonadetes;o__Gemmatimonadales;f__GWC2-71-9;g__WVYX01;s__	N/A	N/A	N/A	N/A	N/A	GCA_011772755.1	95	d__Bacteria;p__Gemmatimonadota;c__Gemmatimonadetes;o__Gemmatimonadales;f__GWC2-71-9;g__WVYX01;s__WVYX01 sp011772755	76.42	0.09	d__Bacteria;p__Gemmatimonadota;c__Gemmatimonadetes;o__Gemmatimonadales;f__GWC2-71-9;g__;s__	taxonomic classification defined by topology and ANI	N/A	N/A	77.11
	M8-58_Bin_472	Group3	N	Yes	Gemmatimonadetes	d__Bacteria;p__Gemmatimonadota;c__Gemmatimonadetes;o__KS3-K002;f__KS3-K002;g__;s__	N	3.61651	3.82942	427	46032	11466	64.34	3464	3616505	2005	8469.6	Bohai Sea M8, China	Coastal Sediment	39.6928N/120.6606E	k__Bacteria (UID2495)	2993	147	91	6	134	7	0	0	0	94.44	6.59	28.57	d__Bacteria;p__Gemmatimonadota;c__Gemmatimonadetes;o__KS3-K002;f__KS3-K002;g__;s__	N/A	N/A	N/A	N/A	N/A	GCA_011774835.1	95	d__Bacteria;p__Gemmatimonadota;c__Gemmatimonadetes;o__KS3-K002;f__KS3-K002;g__KS3-K002;s__KS3-K002 sp011774835	77.53	0.25	d__Bacteria;p__Gemmatimonadota;c__Gemmatimonadetes;o__KS3-K002;f__;g__;s__	taxonomic classification defined by topology and ANI	N/A	N/A	84.04
	M8-58_Bin_476	Group4	N	Yes	Gemmatimonadetes	d__Bacteria;p__Gemmatimonadota;c__Gemmatimonadetes;o__Longimicrobiales;f__UBA6960;g__JABDNZ01;s__	N	5.48245	6.14832	762	38806	9401	61.22	5301	5482454	2000	7194.8	Bohai Sea M8, China	Coastal Sediment	39.6928N/120.6606E	k__Bacteria (UID2495)	2993	147	91	42	99	6	0	0	0	89.17	5.49	33.33	d__Bacteria;p__Gemmatimonadota;c__Gemmatimonadetes;o__Longimicrobiales;f__UBA6960;g__JABDNZ01;s__	N/A	N/A	N/A	N/A	N/A	GCA_013043565.1	95	d__Bacteria;p__Gemmatimonadota;c__Gemmatimonadetes;o__Longimicrobiales;f__UBA6960;g__JABDNZ01;s__JABDNZ01 sp013043565	78.64	0.31	d__Bacteria;p__Gemmatimonadota;c__Gemmatimonadetes;o__Longimicrobiales;f__UBA6960;g__;s__	taxonomic classification defined by topology and ANI	N/A	N/A	71.13
	M8-58_Bin_51	Group2	N	Yes	Gemmatimonadetes	d__Bacteria;p__Gemmatimonadota;c__Gemmatimonadetes;o__Gemmatimonadales;f__GWC2-71-9;g__JABDII01;s__	N	5.06164	9.91118	1279	26634	4113	63.35	5920	5061638	2000	3957.5	Bohai Sea M8, China	Coastal Sediment	39.6928N/120.6606E	k__Bacteria (UID2495)	2993	147	91	68	72	7	0	0	0	51.07	6.14	85.71	d__Bacteria;p__Gemmatimonadota;c__Gemmatimonadetes;o__Gemmatimonadales;f__GWC2-71-9;g__JABDII01;s__	N/A	N/A	N/A	N/A	N/A	GCA_013003805.1	95	d__Bacteria;p__Gemmatimonadota;c__Gemmatimonadetes;o__Gemmatimonadales;f__GWC2-71-9;g__JABDII01;s__JABDII01 sp013003805	83.52	0.32	d__Bacteria;p__Gemmatimonadota;c__Gemmatimonadetes;o__Gemmatimonadales;f__GWC2-71-9;g__;s__	taxonomic classification defined by topology and ANI	N/A	N/A	38.16
	M8-58_Bin_55	Group2	Y	Yes	Gemmatimonadetes	d__Bacteria;p__Gemmatimonadota;c__Gemmatimonadetes;o__Gemmatimonadales;f__GWC2-71-9;g__WVYX01;s__	N	5.82309	6.02181	598	188931	15899	60.34	5705	5823089	2000	9737.6	Bohai Sea M8, China	Coastal Sediment	39.6928N/120.6606E	k__Bacteria (UID2495)	2993	147	91	3	139	5	0	0	0	96.7	4.46	20	d__Bacteria;p__Gemmatimonadota;c__Gemmatimonadetes;o__Gemmatimonadales;f__GWC2-71-9;g__WVYX01;s__	N/A	N/A	N/A	N/A	N/A	GCA_011772755.1	95	d__Bacteria;p__Gemmatimonadota;c__Gemmatimonadetes;o__Gemmatimonadales;f__GWC2-71-9;g__WVYX01;s__WVYX01 sp011772755	77.73	0.07	d__Bacteria;p__Gemmatimonadota;c__Gemmatimonadetes;o__Gemmatimonadales;f__GWC2-71-9;g__;s__	taxonomic classification defined by topology and ANI	N/A	N/A	89.91
	M8-58_Bin_61	Group2	N	Yes	Gemmatimonadetes	d__Bacteria;p__Gemmatimonadota;c__Gemmatimonadetes;o__Gemmatimonadales;f__GWC2-71-9;g__WVYX01;s__	N	2.36647	3.65252	631	17489	3883	67.26	2788	2366467	2000	3750.3	Bohai Sea M8, China	Coastal Sediment	39.6928N/120.6606E	k__Bacteria (UID2495)	2993	147	91	39	101	7	0	0	0	64.79	6.59	57.14	d__Bacteria;p__Gemmatimonadota;c__Gemmatimonadetes;o__Gemmatimonadales;f__GWC2-71-9;g__WVYX01;s__	N/A	N/A	N/A	N/A	N/A	GCA_011772755.1	95	d__Bacteria;p__Gemmatimonadota;c__Gemmatimonadetes;o__Gemmatimonadales;f__GWC2-71-9;g__WVYX01;s__WVYX01 sp011772755	76.99	0.2	d__Bacteria;p__Gemmatimonadota;c__Gemmatimonadetes;o__Gemmatimonadales;f__GWC2-71-9;g__;s__	taxonomic classification defined by topology and ANI	N/A	N/A	56.92
	M8-58_Bin_97	Group2	Y	Yes	Gemmatimonadetes	d__Bacteria;p__Gemmatimonadota;c__Gemmatimonadetes;o__Gemmatimonadales;f__GWC2-71-9;g__WVYX01;s__	N	3.1616	3.596	246	91006	21657	67.43	3075	3161601	2000	12852	Bohai Sea M8, China	Coastal Sediment	39.6928N/120.6606E	k__Bacteria (UID2495)	2993	147	91	27	119	1	0	0	0	87.92	1.1	0	d__Bacteria;p__Gemmatimonadota;c__Gemmatimonadetes;o__Gemmatimonadales;f__GWC2-71-9;g__WVYX01;s__	N/A	N/A	N/A	N/A	N/A	GCA_011772755.1	95	d__Bacteria;p__Gemmatimonadota;c__Gemmatimonadetes;o__Gemmatimonadales;f__GWC2-71-9;g__WVYX01;s__WVYX01 sp011772755	76.89	0.2	d__Bacteria;p__Gemmatimonadota;c__Gemmatimonadetes;o__Gemmatimonadales;f__GWC2-71-9;g__;s__	taxonomic classification defined by topology and ANI	N/A	N/A	78.9
	M8-58_Bin_98	Group4	N	Yes	Gemmatimonadetes	d__Bacteria;p__Gemmatimonadota;c__Gemmatimonadetes;o__Longimicrobiales;f__UBA6960;g__JABDNZ01;s__	N	3.29589	5.24656	844	16436	4190	63.1	3456	3295889	2001	3905.1	Bohai Sea M8, China	Coastal Sediment	39.6928N/120.6606E	k__Bacteria (UID2495)	2993	147	91	43	100	4	0	0	0	62.82	3.85	0	d__Bacteria;p__Gemmatimonadota;c__Gemmatimonadetes;o__Longimicrobiales;f__UBA6960;g__JABDNZ01;s__	N/A	N/A	N/A	N/A	N/A	GCA_013043565.1	95	d__Bacteria;p__Gemmatimonadota;c__Gemmatimonadetes;o__Longimicrobiales;f__UBA6960;g__JABDNZ01;s__JABDNZ01 sp013043565	76.77	0.16	d__Bacteria;p__Gemmatimonadota;c__Gemmatimonadetes;o__Longimicrobiales;f__UBA6960;g__;s__	taxonomic classification defined by topology and ANI	N/A	N/A	54.14
	M8-62_Bin_100	Group2	N	Yes	Gemmatimonadetes	d__Bacteria;p__Gemmatimonadota;c__Gemmatimonadetes;o__Gemmatimonadales;f__GWC2-71-9;g__WVYX01;s__	N	3.30301	4.54209	535	42482	8178	66.69	3481	3303010	2004	6173.9	Bohai Sea M8, China	Coastal Sediment	39.6928N/120.6606E	k__Bacteria (UID2495)	2993	147	91	49	92	6	0	0	0	72.72	4.5	66.67	d__Bacteria;p__Gemmatimonadota;c__Gemmatimonadetes;o__Gemmatimonadales;f__GWC2-71-9;g__WVYX01;s__	N/A	N/A	N/A	N/A	N/A	GCA_011772755.1	95	d__Bacteria;p__Gemmatimonadota;c__Gemmatimonadetes;o__Gemmatimonadales;f__GWC2-71-9;g__WVYX01;s__WVYX01 sp011772755	76.46	0.18	d__Bacteria;p__Gemmatimonadota;c__Gemmatimonadetes;o__Gemmatimonadales;f__GWC2-71-9;g__;s__	taxonomic classification defined by topology and ANI	N/A	N/A	55.89
	M8-62_Bin_106	Group2	N	Yes	Gemmatimonadetes	d__Bacteria;p__Gemmatimonadota;c__Gemmatimonadetes;o__Gemmatimonadales;f__GWC2-71-9;g__WVYX01;s__	N	6.22686	8.16637	1267	31824	5764	59.44	6638	6226860	2000	4914.6	Bohai Sea M8, China	Coastal Sediment	39.6928N/120.6606E	k__Bacteria (UID2495)	2993	147	91	33	100	13	1	0	0	76.25	8.94	37.5	d__Bacteria;p__Gemmatimonadota;c__Gemmatimonadetes;o__Gemmatimonadales;f__GWC2-71-9;g__WVYX01;s__	N/A	N/A	N/A	N/A	N/A	GCA_011772755.1	95	d__Bacteria;p__Gemmatimonadota;c__Gemmatimonadetes;o__Gemmatimonadales;f__GWC2-71-9;g__WVYX01;s__WVYX01 sp011772755	77.45	0.05	d__Bacteria;p__Gemmatimonadota;c__Gemmatimonadetes;o__Gemmatimonadales;f__GWC2-71-9;g__;s__	taxonomic classification defined by topology and ANI	N/A	N/A	64.56
	M8-62_Bin_109	Group2	Y	Yes	Gemmatimonadetes	d__Bacteria;p__Gemmatimonadota;c__Gemmatimonadetes;o__Gemmatimonadales;f__GWC2-71-9;g__WVYX01;s__	Y	6.1964	6.96616	475	164139	28650	63.91	5767	6196399	2010	13045.1	Bohai Sea M8, China	Coastal Sediment	39.6928N/120.6606E	k__Bacteria (UID2495)	2993	147	91	11	132	4	0	0	0	88.95	4.4	0	d__Bacteria;p__Gemmatimonadota;c__Gemmatimonadetes;o__Gemmatimonadales;f__GWC2-71-9;g__WVYX01;s__	N/A	N/A	N/A	N/A	N/A	GCA_011772755.1	95	d__Bacteria;p__Gemmatimonadota;c__Gemmatimonadetes;o__Gemmatimonadales;f__GWC2-71-9;g__WVYX01;s__WVYX01 sp011772755	76.54	0.09	d__Bacteria;p__Gemmatimonadota;c__Gemmatimonadetes;o__Gemmatimonadales;f__GWC2-71-9;g__;s__	taxonomic classification defined by topology and ANI	N/A	N/A	88.43
	M8-62_Bin_117	Group2	Y	Yes	Gemmatimonadetes	d__Bacteria;p__Gemmatimonadota;c__Gemmatimonadetes;o__Gemmatimonadales;f__GWC2-71-9;g__WVYX01;s__	N	3.99217	4.08197	236	216396	67617	65.47	3795	3992170	2000	16916	Bohai Sea M8, China	Coastal Sediment	39.6928N/120.6606E	k__Bacteria (UID2495)	2993	147	91	2	141	4	0	0	0	97.8	4.4	0	d__Bacteria;p__Gemmatimonadota;c__Gemmatimonadetes;o__Gemmatimonadales;f__GWC2-71-9;g__WVYX01;s__	N/A	N/A	N/A	N/A	N/A	GCA_011772755.1	95	d__Bacteria;p__Gemmatimonadota;c__Gemmatimonadetes;o__Gemmatimonadales;f__GWC2-71-9;g__WVYX01;s__WVYX01 sp011772755	76.6	0.13	d__Bacteria;p__Gemmatimonadota;c__Gemmatimonadetes;o__Gemmatimonadales;f__GWC2-71-9;g__;s__	taxonomic classification defined by topology and ANI	N/A	N/A	92.97
	M8-62_Bin_123	Group4	Y	Yes	Gemmatimonadetes	d__Bacteria;p__Gemmatimonadota;c__Gemmatimonadetes;o__Longimicrobiales;f__UBA6960;g__UBA822;s__	N	3.20355	3.95402	577	28630	7277	64.03	3291	3203548	2000	5552.1	Bohai Sea M8, China	Coastal Sediment	39.6928N/120.6606E	k__Bacteria (UID2495)	2993	147	91	29	116	2	0	0	0	81.02	2.2	0	d__Bacteria;p__Gemmatimonadota;c__Gemmatimonadetes;o__Longimicrobiales;f__UBA6960;g__UBA822;s__	N/A	N/A	N/A	N/A	N/A	N/A	N/A	N/A	N/A	N/A	d__Bacteria;p__Gemmatimonadota;c__Gemmatimonadetes;o__Longimicrobiales;f__UBA6960;g__;s__	taxonomic novelty determined using RED	N/A	N/A	66.11
	M8-62_Bin_126	Group2	Y	Yes	Gemmatimonadetes	d__Bacteria;p__Gemmatimonadota;c__Gemmatimonadetes;o__Gemmatimonadales;f__GWC2-71-9;g__WVYX01;s__	N	6.34405	6.95544	958	50687	8871	62.57	6226	6344054	2003	6622.2	Bohai Sea M8, China	Coastal Sediment	39.6928N/120.6606E	k__Bacteria (UID2495)	2993	147	91	11	130	6	0	0	0	91.21	3.73	16.67	d__Bacteria;p__Gemmatimonadota;c__Gemmatimonadetes;o__Gemmatimonadales;f__GWC2-71-9;g__WVYX01;s__	N/A	N/A	N/A	N/A	N/A	GCA_011772755.1	95	d__Bacteria;p__Gemmatimonadota;c__Gemmatimonadetes;o__Gemmatimonadales;f__GWC2-71-9;g__WVYX01;s__WVYX01 sp011772755	75.77	0.07	d__Bacteria;p__Gemmatimonadota;c__Gemmatimonadetes;o__Gemmatimonadales;f__GWC2-71-9;g__;s__	taxonomic classification defined by topology and ANI	N/A	N/A	81.44
	M8-62_Bin_130	Group1	Y	Yes	Gemmatimonadetes	d__Bacteria;p__Gemmatimonadota;c__Gemmatimonadetes;o__JACCXV01;f__;g__;s__	N	2.56276	2.95521	279	66532	13897	62.06	2745	2562756	2008	9185.5	Bohai Sea M8, China	Coastal Sediment	39.6928N/120.6606E	k__Bacteria (UID2495)	2993	147	91	20	122	5	0	0	0	86.72	3.58	40	d__Bacteria;p__Gemmatimonadota;c__Gemmatimonadetes;o__JACCXV01;f__;g__;s__	N/A	N/A	N/A	N/A	N/A	GCA_013696835.1	95	d__Bacteria;p__Gemmatimonadota;c__Gemmatimonadetes;o__JACCXV01;f__JACCXV01;g__JACCXV01;s__JACCXV01 sp013696835	75.78	0.04	d__Bacteria;p__Gemmatimonadota;c__Gemmatimonadetes;o__;f__;g__;s__	taxonomic classification defined by topology and ANI	N/A	N/A	77.07
	M8-62_Bin_149	Group3	N	Yes	Gemmatimonadetes	d__Bacteria;p__Gemmatimonadota;c__Gemmatimonadetes;o__KS3-K002;f__KS3-K002;g__KS3-K002;s__	N	4.17678	4.48345	446	54671	13095	64.36	3883	4176784	2019	9365	Bohai Sea M8, China	Coastal Sediment	39.6928N/120.6606E	k__Bacteria (UID2495)	2993	147	91	8	134	5	0	0	0	93.16	5.49	20	d__Bacteria;p__Gemmatimonadota;c__Gemmatimonadetes;o__KS3-K002;f__KS3-K002;g__KS3-K002;s__	N/A	N/A	N/A	N/A	N/A	GCA_011774835.1	95	d__Bacteria;p__Gemmatimonadota;c__Gemmatimonadetes;o__KS3-K002;f__KS3-K002;g__KS3-K002;s__KS3-K002 sp011774835	77.78	0.27	d__Bacteria;p__Gemmatimonadota;c__Gemmatimonadetes;o__KS3-K002;f__;g__;s__	taxonomic classification defined by topology and ANI	N/A	N/A	82.21
	M8-62_Bin_160	Group3	Y	Yes	Gemmatimonadetes	d__Bacteria;p__Gemmatimonadota;c__Gemmatimonadetes;o__KS3-K002;f__KS3-K002;g__;s__	N	5.79412	6.43005	544	61719	16581	63.04	5352	5794122	2032	10651	Bohai Sea M8, China	Coastal Sediment	39.6928N/120.6606E	k__Bacteria (UID2495)	2993	147	91	12	132	2	1	0	0	90.11	3.85	20	d__Bacteria;p__Gemmatimonadota;c__Gemmatimonadetes;o__KS3-K002;f__KS3-K002;g__;s__	N/A	N/A	N/A	N/A	N/A	GCA_011774835.1	95	d__Bacteria;p__Gemmatimonadota;c__Gemmatimonadetes;o__KS3-K002;f__KS3-K002;g__KS3-K002;s__KS3-K002 sp011774835	76.7	0.19	d__Bacteria;p__Gemmatimonadota;c__Gemmatimonadetes;o__KS3-K002;f__;g__;s__	taxonomic classification defined by topology and ANI	N/A	N/A	82.01
	M8-62_Bin_168	Group4	N	Yes	Gemmatimonadetes	d__Bacteria;p__Gemmatimonadota;c__Gemmatimonadetes;o__Longimicrobiales;f__UBA6960;g__JABDNZ01;s__	N	4.45148	5.91795	1005	19876	4876	61.24	4634	4451485	2000	4429.3	Bohai Sea M8, China	Coastal Sediment	39.6928N/120.6606E	k__Bacteria (UID2495)	2993	147	91	41	102	4	0	0	0	75.22	3.4	25	d__Bacteria;p__Gemmatimonadota;c__Gemmatimonadetes;o__Longimicrobiales;f__UBA6960;g__JABDNZ01;s__	N/A	N/A	N/A	N/A	N/A	GCA_013043565.1	95	d__Bacteria;p__Gemmatimonadota;c__Gemmatimonadetes;o__Longimicrobiales;f__UBA6960;g__JABDNZ01;s__JABDNZ01 sp013043565	78.87	0.28	d__Bacteria;p__Gemmatimonadota;c__Gemmatimonadetes;o__Longimicrobiales;f__UBA6960;g__;s__	taxonomic classification defined by topology and ANI	N/A	N/A	62.28
	M8-62_Bin_171	Group3	N	Yes	Gemmatimonadetes	d__Bacteria;p__Gemmatimonadota;c__Gemmatimonadetes;o__KS3-K002;f__JABDQB01;g__JABDQB01;s__	N	2.6033	3.48361	461	33779	6775	66.86	2774	2603302	2000	5647.1	Bohai Sea M8, China	Coastal Sediment	39.6928N/120.6606E	k__Bacteria (UID2495)	2993	147	91	23	110	14	0	0	0	74.73	4.79	21.43	d__Bacteria;p__Gemmatimonadota;c__Gemmatimonadetes;o__KS3-K002;f__JABDQB01;g__JABDQB01;s__	N/A	N/A	N/A	N/A	N/A	GCA_013042495.1	95	d__Bacteria;p__Gemmatimonadota;c__Gemmatimonadetes;o__KS3-K002;f__JABDQB01;g__JABDQB01;s__JABDQB01 sp013042495	77.93	0.22	d__Bacteria;p__Gemmatimonadota;c__Gemmatimonadetes;o__KS3-K002;f__JABDQB01;g__;s__	taxonomic classification defined by topology and ANI	N/A	N/A	74.61
	M8-62_Bin_182	Group3	Y	Yes	Gemmatimonadetes	d__Bacteria;p__Gemmatimonadota;c__Gemmatimonadetes;o__KS3-K002;f__JABDQB01;g__;s__	N	3.37584	3.8559	525	35915	7873	65.12	3328	3375838	2032	6430.2	Bohai Sea M8, China	Coastal Sediment	39.6928N/120.6606E	k__Bacteria (UID2495)	2993	147	91	14	128	5	0	0	0	87.55	4.4	40	d__Bacteria;p__Gemmatimonadota;c__Gemmatimonadetes;o__KS3-K002;f__JABDQB01;g__;s__	N/A	N/A	N/A	N/A	N/A	N/A	N/A	N/A	N/A	N/A	d__Bacteria;p__Gemmatimonadota;c__Gemmatimonadetes;o__KS3-K002;f__JABDQB01;g__;s__	taxonomic novelty determined using RED	N/A	N/A	80.96
	M8-62_Bin_191	Group2	Y	Yes	Gemmatimonadetes	d__Bacteria;p__Gemmatimonadota;c__Gemmatimonadetes;o__Gemmatimonadales;f__GWC2-71-9;g__WVYX01;s__	Y	5.04893	5.79338	431	103763	19023	57.51	4692	5048934	2013	11714.5	Bohai Sea M8, China	Coastal Sediment	39.6928N/120.6606E	k__Bacteria (UID2495)	2993	147	91	20	124	3	0	0	0	87.15	3.3	0	d__Bacteria;p__Gemmatimonadota;c__Gemmatimonadetes;o__Gemmatimonadales;f__GWC2-71-9;g__WVYX01;s__	N/A	N/A	N/A	N/A	N/A	GCA_011772755.1	95	d__Bacteria;p__Gemmatimonadota;c__Gemmatimonadetes;o__Gemmatimonadales;f__GWC2-71-9;g__WVYX01;s__WVYX01 sp011772755	76.2	0.03	d__Bacteria;p__Gemmatimonadota;c__Gemmatimonadetes;o__Gemmatimonadales;f__GWC2-71-9;g__;s__	taxonomic classification defined by topology and ANI	N/A	N/A	82.29
	M8-62_Bin_193	Group3	Y	Yes	Gemmatimonadetes	d__Bacteria;p__Gemmatimonadota;c__Gemmatimonadetes;o__KS3-K002;f__KS3-K002;g__KS3-K002;s__	N	4.98355	5.41044	646	55666	9974	63.28	4756	4983552	2007	7714.5	Bohai Sea M8, China	Coastal Sediment	39.6928N/120.6606E	k__Bacteria (UID2495)	2993	147	91	10	132	4	1	0	0	92.11	4.5	28.57	d__Bacteria;p__Gemmatimonadota;c__Gemmatimonadetes;o__KS3-K002;f__KS3-K002;g__KS3-K002;s__	N/A	N/A	N/A	N/A	N/A	GCA_011774835.1	95	d__Bacteria;p__Gemmatimonadota;c__Gemmatimonadetes;o__KS3-K002;f__KS3-K002;g__KS3-K002;s__KS3-K002 sp011774835	76.79	0.17	d__Bacteria;p__Gemmatimonadota;c__Gemmatimonadetes;o__KS3-K002;f__;g__;s__	taxonomic classification defined by topology and ANI	N/A	N/A	79.75
	M8-62_Bin_196	Group3	Y	Yes	Gemmatimonadetes	d__Bacteria;p__Gemmatimonadota;c__Gemmatimonadetes;o__KS3-K002;f__KS3-K002;g__;s__	N	2.655	3.17887	418	38045	7920	65.3	2752	2654996	2005	6351.7	Bohai Sea M8, China	Coastal Sediment	39.6928N/120.6606E	k__Bacteria (UID2495)	2993	147	91	17	128	2	0	0	0	83.52	0.13	50	d__Bacteria;p__Gemmatimonadota;c__Gemmatimonadetes;o__KS3-K002;f__KS3-K002;g__;s__	N/A	N/A	N/A	N/A	N/A	GCA_011774835.1	95	d__Bacteria;p__Gemmatimonadota;c__Gemmatimonadetes;o__KS3-K002;f__KS3-K002;g__KS3-K002;s__KS3-K002 sp011774835	78.11	0.3	d__Bacteria;p__Gemmatimonadota;c__Gemmatimonadetes;o__KS3-K002;f__;g__;s__	taxonomic classification defined by topology and ANI	N/A	N/A	73.6
	M8-62_Bin_197	Group3	N	Yes	Gemmatimonadetes	d__Bacteria;p__Gemmatimonadota;c__Gemmatimonadetes;o__KS3-K002;f__KS3-K002;g__KS3-K002;s__	N	3.09637	4.40262	685	13952	5018	64.43	3270	3096365	2006	4520.2	Bohai Sea M8, China	Coastal Sediment	39.6928N/120.6606E	k__Bacteria (UID2495)	2993	147	91	35	109	3	0	0	0	70.33	2.75	0	d__Bacteria;p__Gemmatimonadota;c__Gemmatimonadetes;o__KS3-K002;f__KS3-K002;g__KS3-K002;s__	N/A	N/A	N/A	N/A	N/A	GCA_011774835.1	95	d__Bacteria;p__Gemmatimonadota;c__Gemmatimonadetes;o__KS3-K002;f__KS3-K002;g__KS3-K002;s__KS3-K002 sp011774835	77.48	0.24	d__Bacteria;p__Gemmatimonadota;c__Gemmatimonadetes;o__KS3-K002;f__;g__;s__	taxonomic classification defined by topology and ANI	N/A	N/A	60.95
	M8-62_Bin_1	Group2	N	Yes	Gemmatimonadetes	d__Bacteria;p__Gemmatimonadota;c__Gemmatimonadetes;o__Gemmatimonadales;f__GWC2-71-9;g__WVYX01;s__	N	3.17948	5.54497	532	31420	7180	66.59	3283	3179484	2010	5976.5	Bohai Sea M8, China	Coastal Sediment	39.6928N/120.6606E	k__Bacteria (UID2495)	2993	147	91	61	79	7	0	0	0	57.34	3.11	85.71	d__Bacteria;p__Gemmatimonadota;c__Gemmatimonadetes;o__Gemmatimonadales;f__GWC2-71-9;g__WVYX01;s__	N/A	N/A	N/A	N/A	N/A	GCA_011772755.1	95	d__Bacteria;p__Gemmatimonadota;c__Gemmatimonadetes;o__Gemmatimonadales;f__GWC2-71-9;g__WVYX01;s__WVYX01 sp011772755	76.62	0.17	d__Bacteria;p__Gemmatimonadota;c__Gemmatimonadetes;o__Gemmatimonadales;f__GWC2-71-9;g__;s__	taxonomic classification defined by topology and ANI	N/A	N/A	50.35
	M8-62_Bin_206	Group3	N	Yes	Gemmatimonadetes	d__Bacteria;p__Gemmatimonadota;c__Gemmatimonadetes;o__KS3-K002;f__;g__;s__	N	2.18591	3.5268	463	21123	5298	66.17	2471	2185912	2000	4721.2	Bohai Sea M8, China	Coastal Sediment	39.6928N/120.6606E	k__Bacteria (UID2495)	2993	147	91	51	94	2	0	0	0	61.98	2.2	0	d__Bacteria;p__Gemmatimonadota;c__Gemmatimonadetes;o__KS3-K002;f__;g__;s__	N/A	N/A	N/A	N/A	N/A	N/A	N/A	N/A	N/A	N/A	d__Bacteria;p__Gemmatimonadota;c__Gemmatimonadetes;o__KS3-K002;f__;g__;s__	taxonomic novelty determined using RED	N/A	N/A	53.44
	M8-62_Bin_211	Group2	Y	Yes	Gemmatimonadetes	d__Bacteria;p__Gemmatimonadota;c__Gemmatimonadetes;o__Gemmatimonadales;f__GWC2-71-9;g__WVYX01;s__	N	5.62276	5.74925	458	131149	22433	60.41	5413	5622764	2001	12276.8	Bohai Sea M8, China	Coastal Sediment	39.6928N/120.6606E	k__Bacteria (UID2495)	2993	147	91	2	141	4	0	0	0	97.8	3.36	0	d__Bacteria;p__Gemmatimonadota;c__Gemmatimonadetes;o__Gemmatimonadales;f__GWC2-71-9;g__WVYX01;s__	N/A	N/A	N/A	N/A	N/A	GCA_011772755.1	95	d__Bacteria;p__Gemmatimonadota;c__Gemmatimonadetes;o__Gemmatimonadales;f__GWC2-71-9;g__WVYX01;s__WVYX01 sp011772755	77.22	0.07	d__Bacteria;p__Gemmatimonadota;c__Gemmatimonadetes;o__Gemmatimonadales;f__GWC2-71-9;g__;s__	taxonomic classification defined by topology and ANI	N/A	N/A	91.26
	M8-62_Bin_229	Group4	Y	Yes	Gemmatimonadetes	d__Bacteria;p__Gemmatimonadota;c__Gemmatimonadetes;o__Longimicrobiales;f__UBA6960;g__;s__	N	6.66645	6.7406	288	211124	54514	67.49	5733	6666453	2014	23147.4	Bohai Sea M8, China	Coastal Sediment	39.6928N/120.6606E	k__Bacteria (UID2495)	2993	147	91	1	143	3	0	0	0	98.9	3.3	0	d__Bacteria;p__Gemmatimonadota;c__Gemmatimonadetes;o__Longimicrobiales;f__UBA6960;g__;s__	N/A	N/A	N/A	N/A	N/A	N/A	N/A	N/A	N/A	N/A	d__Bacteria;p__Gemmatimonadota;c__Gemmatimonadetes;o__Longimicrobiales;f__UBA6960;g__;s__	taxonomic classification fully defined by topology	N/A	N/A	89.8
	M8-62_Bin_238	Group3	Y	Yes	Gemmatimonadetes	d__Bacteria;p__Gemmatimonadota;c__Gemmatimonadetes;o__KS3-K002;f__JABDQB01;g__JABDQB01;s__	Y	3.03398	3.17362	118	385531	47872	65.71	2935	3033981	2071	25711.7	Bohai Sea M8, China	Coastal Sediment	39.6928N/120.6606E	k__Bacteria (UID2495)	2993	147	91	4	140	3	0	0	0	95.6	3.3	0	d__Bacteria;p__Gemmatimonadota;c__Gemmatimonadetes;o__KS3-K002;f__JABDQB01;g__JABDQB01;s__	N/A	N/A	N/A	N/A	N/A	GCA_013042495.1	95	d__Bacteria;p__Gemmatimonadota;c__Gemmatimonadetes;o__KS3-K002;f__JABDQB01;g__JABDQB01;s__JABDQB01 sp013042495	76.89	0.13	d__Bacteria;p__Gemmatimonadota;c__Gemmatimonadetes;o__KS3-K002;f__JABDQB01;g__;s__	taxonomic classification defined by topology and ANI	N/A	N/A	89.4
	M8-62_Bin_261	Group4	Y	Yes	Gemmatimonadetes	d__Bacteria;p__Gemmatimonadota;c__Gemmatimonadetes;o__Longimicrobiales;f__UBA6960;g__SZUA-318;s__	N	4.42723	5.0999	893	30003	5688	68.3	4431	4427227	2000	4957.7	Bohai Sea M8, China	Coastal Sediment	39.6928N/120.6606E	k__Bacteria (UID2495)	2993	147	91	14	129	4	0	0	0	86.81	4.4	25	d__Bacteria;p__Gemmatimonadota;c__Gemmatimonadetes;o__Longimicrobiales;f__UBA6960;g__SZUA-318;s__	N/A	N/A	N/A	N/A	N/A	GCA_003248075.1	95	d__Bacteria;p__Gemmatimonadota;c__Gemmatimonadetes;o__Longimicrobiales;f__UBA6960;g__SZUA-318;s__SZUA-318 sp003248075	76.79	0.26	d__Bacteria;p__Gemmatimonadota;c__Gemmatimonadetes;o__Longimicrobiales;f__UBA6960;g__;s__	taxonomic classification defined by topology and ANI	N/A	N/A	75.82
	M8-62_Bin_304	Group2	Y	Yes	Gemmatimonadetes	d__Bacteria;p__Gemmatimonadota;c__Gemmatimonadetes;o__Gemmatimonadales;f__GWC2-71-9;g__WVYX01;s__	N	2.93247	3.13936	189	102101	25864	67.8	2838	2932473	2002	15515.7	Bohai Sea M8, China	Coastal Sediment	39.6928N/120.6606E	k__Bacteria (UID2495)	2993	147	91	8	135	4	0	0	0	93.41	3.66	0	d__Bacteria;p__Gemmatimonadota;c__Gemmatimonadetes;o__Gemmatimonadales;f__GWC2-71-9;g__WVYX01;s__	N/A	N/A	N/A	N/A	N/A	GCA_011772755.1	95	d__Bacteria;p__Gemmatimonadota;c__Gemmatimonadetes;o__Gemmatimonadales;f__GWC2-71-9;g__WVYX01;s__WVYX01 sp011772755	77.16	0.25	d__Bacteria;p__Gemmatimonadota;c__Gemmatimonadetes;o__Gemmatimonadales;f__GWC2-71-9;g__;s__	taxonomic classification defined by topology and ANI	N/A	N/A	86.76
	M8-62_Bin_309	Group3	Y	Yes	Gemmatimonadetes	d__Bacteria;p__Gemmatimonadota;c__Gemmatimonadetes;o__KS3-K002;f__JABDQB01;g__;s__	N	4.3642	4.46237	246	145554	26245	66.45	3947	4364199	2009	17740.6	Bohai Sea M8, China	Coastal Sediment	39.6928N/120.6606E	k__Bacteria (UID2495)	2993	147	91	2	141	4	0	0	0	97.8	4.4	25	d__Bacteria;p__Gemmatimonadota;c__Gemmatimonadetes;o__KS3-K002;f__JABDQB01;g__;s__	N/A	N/A	N/A	N/A	N/A	N/A	N/A	N/A	N/A	N/A	d__Bacteria;p__Gemmatimonadota;c__Gemmatimonadetes;o__KS3-K002;f__JABDQB01;g__;s__	taxonomic novelty determined using RED	N/A	N/A	91.05
	M8-62_Bin_30	Group2	N	Yes	Gemmatimonadetes	d__Bacteria;p__Gemmatimonadota;c__Gemmatimonadetes;o__Gemmatimonadales;f__GWC2-71-9;g__WVYX01;s__	N	6.1315	6.94709	1048	47120	7180	63.62	6638	6131502	2000	5850.7	Bohai Sea M8, China	Coastal Sediment	39.6928N/120.6606E	k__Bacteria (UID2495)	2993	147	91	13	125	9	0	0	0	88.26	9.89	0	d__Bacteria;p__Gemmatimonadota;c__Gemmatimonadetes;o__Gemmatimonadales;f__GWC2-71-9;g__WVYX01;s__	N/A	N/A	N/A	N/A	N/A	GCA_011772755.1	95	d__Bacteria;p__Gemmatimonadota;c__Gemmatimonadetes;o__Gemmatimonadales;f__GWC2-71-9;g__WVYX01;s__WVYX01 sp011772755	76.13	0.07	d__Bacteria;p__Gemmatimonadota;c__Gemmatimonadetes;o__Gemmatimonadales;f__GWC2-71-9;g__;s__	taxonomic classification defined by topology and ANI	N/A	N/A	78.68
	M8-62_Bin_340	Group3	N	Yes	Gemmatimonadetes	d__Bacteria;p__Gemmatimonadota;c__Gemmatimonadetes;o__KS3-K002;f__JABDQB01;g__;s__	N	3.45164	3.99172	472	39610	10155	64.85	3488	3451643	2000	7312.8	Bohai Sea M8, China	Coastal Sediment	39.6928N/120.6606E	k__Bacteria (UID2495)	2993	147	91	15	127	5	0	0	0	86.47	5.49	40	d__Bacteria;p__Gemmatimonadota;c__Gemmatimonadetes;o__KS3-K002;f__JABDQB01;g__;s__	N/A	N/A	N/A	N/A	N/A	N/A	N/A	N/A	N/A	N/A	d__Bacteria;p__Gemmatimonadota;c__Gemmatimonadetes;o__KS3-K002;f__JABDQB01;g__;s__	taxonomic novelty determined using RED	N/A	N/A	77.13
	M8-62_Bin_360	Group3	Y	Yes	Gemmatimonadetes	d__Bacteria;p__Gemmatimonadota;c__Gemmatimonadetes;o__KS3-K002;f__KS3-K002;g__KS3-K002;s__	N	3.91943	4.37388	493	40358	10775	64.24	3775	3919434	2015	7950.2	Bohai Sea M8, China	Coastal Sediment	39.6928N/120.6606E	k__Bacteria (UID2495)	2993	147	91	19	125	3	0	0	0	89.61	1.71	66.67	d__Bacteria;p__Gemmatimonadota;c__Gemmatimonadetes;o__KS3-K002;f__KS3-K002;g__KS3-K002;s__	N/A	N/A	N/A	N/A	N/A	GCA_011774835.1	95	d__Bacteria;p__Gemmatimonadota;c__Gemmatimonadetes;o__KS3-K002;f__KS3-K002;g__KS3-K002;s__KS3-K002 sp011774835	78.62	0.34	d__Bacteria;p__Gemmatimonadota;c__Gemmatimonadetes;o__KS3-K002;f__;g__;s__	taxonomic classification defined by topology and ANI	N/A	N/A	78.76
	M8-62_Bin_375	Group2	Y	Yes	Gemmatimonadetes	d__Bacteria;p__Gemmatimonadota;c__Gemmatimonadetes;o__Gemmatimonadales;f__GWC2-71-9;g__WVYX01;s__	N	4.53018	4.58057	201	282718	51009	66.25	4138	4530184	2051	22538.2	Bohai Sea M8, China	Coastal Sediment	39.6928N/120.6606E	k__Bacteria (UID2495)	2993	147	91	1	144	2	0	0	0	98.9	2.2	0	d__Bacteria;p__Gemmatimonadota;c__Gemmatimonadetes;o__Gemmatimonadales;f__GWC2-71-9;g__WVYX01;s__	N/A	N/A	N/A	N/A	N/A	GCA_011772755.1	95	d__Bacteria;p__Gemmatimonadota;c__Gemmatimonadetes;o__Gemmatimonadales;f__GWC2-71-9;g__WVYX01;s__WVYX01 sp011772755	76.65	0.13	d__Bacteria;p__Gemmatimonadota;c__Gemmatimonadetes;o__Gemmatimonadales;f__GWC2-71-9;g__;s__	taxonomic classification defined by topology and ANI	N/A	N/A	93.51
	M8-62_Bin_385	Group3	Y	Yes	Gemmatimonadetes	d__Bacteria;p__Gemmatimonadota;c__Gemmatimonadetes;o__KS3-K002;f__KS3-K002;g__;s__	N	3.71383	4.02627	503	76666	9286	64.4	3652	3713830	2004	7383.4	Bohai Sea M8, China	Coastal Sediment	39.6928N/120.6606E	k__Bacteria (UID2495)	2993	147	91	8	134	5	0	0	0	92.24	4.46	60	d__Bacteria;p__Gemmatimonadota;c__Gemmatimonadetes;o__KS3-K002;f__KS3-K002;g__;s__	N/A	N/A	N/A	N/A	N/A	GCA_011774835.1	95	d__Bacteria;p__Gemmatimonadota;c__Gemmatimonadetes;o__KS3-K002;f__KS3-K002;g__KS3-K002;s__KS3-K002 sp011774835	77.52	0.25	d__Bacteria;p__Gemmatimonadota;c__Gemmatimonadetes;o__KS3-K002;f__;g__;s__	taxonomic classification defined by topology and ANI	N/A	N/A	82.75
	M8-62_Bin_50	Group2	N	Yes	Gemmatimonadetes	d__Bacteria;p__Gemmatimonadota;c__Gemmatimonadetes;o__Gemmatimonadales;f__GWC2-71-9;g__JABDII01;s__	N	3.87027	7.20453	1001	26359	3931	63.4	4429	3870274	2000	3866.4	Bohai Sea M8, China	Coastal Sediment	39.6928N/120.6606E	k__Bacteria (UID2495)	2993	147	91	62	82	3	0	0	0	53.72	3.3	66.67	d__Bacteria;p__Gemmatimonadota;c__Gemmatimonadetes;o__Gemmatimonadales;f__GWC2-71-9;g__JABDII01;s__	N/A	N/A	N/A	N/A	N/A	GCA_013003805.1	95	d__Bacteria;p__Gemmatimonadota;c__Gemmatimonadetes;o__Gemmatimonadales;f__GWC2-71-9;g__JABDII01;s__JABDII01 sp013003805	84.28	0.36	d__Bacteria;p__Gemmatimonadota;c__Gemmatimonadetes;o__Gemmatimonadales;f__GWC2-71-9;g__;s__	taxonomic classification defined by topology and ANI	N/A	N/A	44.71
	M8-62_Bin_72	Group2	N	Yes	Gemmatimonadetes	d__Bacteria;p__Gemmatimonadota;c__Gemmatimonadetes;o__Gemmatimonadales;f__GWC2-71-9;g__WVYX01;s__	N	3.11889	3.93402	284	63366	19794	67	3056	3118888	2006	10982	Bohai Sea M8, China	Coastal Sediment	39.6928N/120.6606E	k__Bacteria (UID2495)	2993	147	91	41	103	3	0	0	0	79.28	3.3	0	d__Bacteria;p__Gemmatimonadota;c__Gemmatimonadetes;o__Gemmatimonadales;f__GWC2-71-9;g__WVYX01;s__	N/A	N/A	N/A	N/A	N/A	GCA_011772755.1	95	d__Bacteria;p__Gemmatimonadota;c__Gemmatimonadetes;o__Gemmatimonadales;f__GWC2-71-9;g__WVYX01;s__WVYX01 sp011772755	76.95	0.2	d__Bacteria;p__Gemmatimonadota;c__Gemmatimonadetes;o__Gemmatimonadales;f__GWC2-71-9;g__;s__	taxonomic classification defined by topology and ANI	N/A	N/A	71.47
	M8-62_Bin_88	Group1	Y	Yes	Gemmatimonadetes	d__Bacteria;p__Gemmatimonadota;c__Gemmatimonadetes;o__JACCXV01;f__;g__;s__	N	2.29647	2.55703	294	36540	9433	62.18	2498	2296468	2003	7811.1	Bohai Sea M8, China	Coastal Sediment	39.6928N/120.6606E	k__Bacteria (UID2495)	2993	147	91	13	128	6	0	0	0	89.81	4.68	16.67	d__Bacteria;p__Gemmatimonadota;c__Gemmatimonadetes;o__JACCXV01;f__;g__;s__	N/A	N/A	N/A	N/A	N/A	GCA_013696835.1	95	d__Bacteria;p__Gemmatimonadota;c__Gemmatimonadetes;o__JACCXV01;f__JACCXV01;g__JACCXV01;s__JACCXV01 sp013696835	75.32	0.02	d__Bacteria;p__Gemmatimonadota;c__Gemmatimonadetes;o__;f__;g__;s__	taxonomic classification defined by topology and ANI	N/A	N/A	85.29
	M8-62_Bin_94	Group2	N	Yes	Gemmatimonadetes	d__Bacteria;p__Gemmatimonadota;c__Gemmatimonadetes;o__Gemmatimonadales;f__GWC2-71-9;g__WVYX01;s__	N	3.18229	4.14955	732	28456	4758	60.82	3713	3182289	2000	4347.4	Bohai Sea M8, China	Coastal Sediment	39.6928N/120.6606E	k__Bacteria (UID2495)	2993	147	91	27	119	1	0	0	0	76.69	1.1	0	d__Bacteria;p__Gemmatimonadota;c__Gemmatimonadetes;o__Gemmatimonadales;f__GWC2-71-9;g__WVYX01;s__	N/A	N/A	N/A	N/A	N/A	GCA_011772755.1	95	d__Bacteria;p__Gemmatimonadota;c__Gemmatimonadetes;o__Gemmatimonadales;f__GWC2-71-9;g__WVYX01;s__WVYX01 sp011772755	76.59	0.04	d__Bacteria;p__Gemmatimonadota;c__Gemmatimonadetes;o__Gemmatimonadales;f__GWC2-71-9;g__;s__	taxonomic classification defined by topology and ANI	N/A	N/A	72.29
	Meg19_02_Bin_143	Group3	Y	Yes	Gemmatimonadetes	d__Bacteria;p__Gemmatimonadota;c__Gemmatimonadetes;o__KS3-K002;f__JABDQB01;g__JABDQB01;s__	N	3.37282	3.48792	229	172413	24631	65.07	3180	3372821	2079	14728.5	Guaymas Basin Megamat19, Mexico	Hydrothermal Vent Sediment	27.010833N/111.415556W	k__Bacteria (UID2495)	2993	147	91	3	141	3	0	0	0	96.7	3.3	0	d__Bacteria;p__Gemmatimonadota;c__Gemmatimonadetes;o__KS3-K002;f__JABDQB01;g__JABDQB01;s__	N/A	N/A	N/A	N/A	N/A	GCA_013042495.1	95	d__Bacteria;p__Gemmatimonadota;c__Gemmatimonadetes;o__KS3-K002;f__JABDQB01;g__JABDQB01;s__JABDQB01 sp013042495	80.86	0.69	d__Bacteria;p__Gemmatimonadota;c__Gemmatimonadetes;o__KS3-K002;f__JABDQB01;g__;s__	taxonomic classification defined by topology and ANI	N/A	N/A	91.76
	Meg19_02_Bin_160	Group3	N	Yes	Gemmatimonadetes	d__Bacteria;p__Gemmatimonadota;c__Gemmatimonadetes;o__KS3-K002;f__JABDQB01;g__JABDQB01;s__	N	2.48397	3.96927	601	25748	4363	65.24	2799	2483972	2003	4133.1	Guaymas Basin Megamat19, Mexico	Hydrothermal Vent Sediment	27.010833N/111.415556W	k__Bacteria (UID2495)	2993	147	91	62	80	4	1	0	0	62.58	6.04	71.43	d__Bacteria;p__Gemmatimonadota;c__Gemmatimonadetes;o__KS3-K002;f__JABDQB01;g__JABDQB01;s__	N/A	N/A	N/A	N/A	N/A	GCA_013042495.1	95	d__Bacteria;p__Gemmatimonadota;c__Gemmatimonadetes;o__KS3-K002;f__JABDQB01;g__JABDQB01;s__JABDQB01 sp013042495	77.84	0.28	d__Bacteria;p__Gemmatimonadota;c__Gemmatimonadetes;o__KS3-K002;f__JABDQB01;g__;s__	taxonomic classification defined by topology and ANI	N/A	N/A	46.95
	Meg19_02_Bin_60	Group3	N	Yes	Gemmatimonadetes	d__Bacteria;p__Gemmatimonadota;c__Gemmatimonadetes;o__KS3-K002;f__JABDQB01;g__;s__	N	2.37653	3.75203	603	26453	4099	59.74	2732	2376533	2007	3941.2	Guaymas Basin Megamat19, Mexico	Hydrothermal Vent Sediment	27.010833N/111.415556W	k__Bacteria (UID2495)	2993	147	91	55	84	8	0	0	0	63.34	8.79	87.5	d__Bacteria;p__Gemmatimonadota;c__Gemmatimonadetes;o__KS3-K002;f__JABDQB01;g__;s__	N/A	N/A	N/A	N/A	N/A	GCA_013042495.1	95	d__Bacteria;p__Gemmatimonadota;c__Gemmatimonadetes;o__KS3-K002;f__JABDQB01;g__JABDQB01;s__JABDQB01 sp013042495	75.39	0.02	d__Bacteria;p__Gemmatimonadota;c__Gemmatimonadetes;o__KS3-K002;f__JABDQB01;g__;s__	taxonomic classification defined by topology and ANI	N/A	N/A	46.42
	Meg19_46_Bin_115	Group3	N	Yes	Gemmatimonadetes	d__Bacteria;p__Gemmatimonadota;c__Gemmatimonadetes;o__KS3-K002;f__JABDQB01;g__;s__	N	3.20692	5.3422	603	27834	6301	66.17	3279	3206922	2017	5318.3	Guaymas Basin Megamat19, Mexico	Hydrothermal Vent Sediment	27.010833N/111.415556W	k__Bacteria (UID2495)	2993	147	91	70	76	1	0	0	0	60.03	1.1	0	d__Bacteria;p__Gemmatimonadota;c__Gemmatimonadetes;o__KS3-K002;f__JABDQB01;g__;s__	N/A	N/A	N/A	N/A	N/A	N/A	N/A	N/A	N/A	N/A	d__Bacteria;p__Gemmatimonadota;c__Gemmatimonadetes;o__KS3-K002;f__JABDQB01;g__;s__	taxonomic novelty determined using RED	N/A	N/A	52.61
	Meg19_46_Bin_122	Group2	N	Yes	Gemmatimonadetes	d__Bacteria;p__Gemmatimonadota;c__Gemmatimonadetes;o__Gemmatimonadales;f__GWC2-71-9;g__WVYX01;s__	N	2.07937	3.48654	600	14567	3446	63.47	2333	2079374	2006	3465.6	Guaymas Basin Megamat19, Mexico	Hydrothermal Vent Sediment	27.010833N/111.415556W	k__Bacteria (UID2495)	2993	147	91	51	91	5	0	0	0	59.64	2.03	20	d__Bacteria;p__Gemmatimonadota;c__Gemmatimonadetes;o__Gemmatimonadales;f__GWC2-71-9;g__WVYX01;s__	N/A	N/A	N/A	N/A	N/A	GCA_011772755.1	95	d__Bacteria;p__Gemmatimonadota;c__Gemmatimonadetes;o__Gemmatimonadales;f__GWC2-71-9;g__WVYX01;s__WVYX01 sp011772755	76.6	0.12	d__Bacteria;p__Gemmatimonadota;c__Gemmatimonadetes;o__Gemmatimonadales;f__GWC2-71-9;g__;s__	taxonomic classification defined by topology and ANI	N/A	N/A	49.06
	Meg19_46_Bin_208	Group3	N	Yes	Gemmatimonadetes	d__Bacteria;p__Gemmatimonadota;c__Gemmatimonadetes;o__KS3-K002;f__JABDQB01;g__JABDQB01;s__	N	3.17566	3.26546	236	108703	22484	65.09	3060	3175663	2086	13456.2	Guaymas Basin Megamat19, Mexico	Hydrothermal Vent Sediment	27.010833N/111.415556W	k__Bacteria (UID2495)	2993	147	91	3	139	5	0	0	0	97.25	5.49	20	d__Bacteria;p__Gemmatimonadota;c__Gemmatimonadetes;o__KS3-K002;f__JABDQB01;g__JABDQB01;s__	N/A	N/A	N/A	N/A	N/A	GCA_013042495.1	95	d__Bacteria;p__Gemmatimonadota;c__Gemmatimonadetes;o__KS3-K002;f__JABDQB01;g__JABDQB01;s__JABDQB01 sp013042495	80.8	0.67	d__Bacteria;p__Gemmatimonadota;c__Gemmatimonadetes;o__KS3-K002;f__JABDQB01;g__;s__	taxonomic classification defined by topology and ANI	N/A	N/A	89.32
	Meg19_46_Bin_236	Group4	Y	Yes	Gemmatimonadetes	d__Bacteria;p__Gemmatimonadota;c__Gemmatimonadetes;o__Longimicrobiales;f__UBA6960;g__JABDNZ01;s__	N	3.14173	3.79665	574	45469	6572	60.47	3119	3141731	2001	5473.4	Guaymas Basin Megamat19, Mexico	Hydrothermal Vent Sediment	27.010833N/111.415556W	k__Bacteria (UID2495)	2993	147	91	31	115	1	0	0	0	82.75	1.1	0	d__Bacteria;p__Gemmatimonadota;c__Gemmatimonadetes;o__Longimicrobiales;f__UBA6960;g__JABDNZ01;s__	N/A	N/A	N/A	N/A	N/A	GCA_013043565.1	95	d__Bacteria;p__Gemmatimonadota;c__Gemmatimonadetes;o__Longimicrobiales;f__UBA6960;g__JABDNZ01;s__JABDNZ01 sp013043565	77.14	0.21	d__Bacteria;p__Gemmatimonadota;c__Gemmatimonadetes;o__Longimicrobiales;f__UBA6960;g__;s__	taxonomic classification defined by topology and ANI	N/A	N/A	69.47
	Meg19_46_Bin_38	Group2	N	Yes	Gemmatimonadetes	d__Bacteria;p__Gemmatimonadota;c__Gemmatimonadetes;o__Gemmatimonadales;f__GWC2-71-9;g__WVYX01;s__	N	3.37101	4.64646	637	37084	6079	61.03	3503	3371010	2008	5292	Guaymas Basin Megamat19, Mexico	Hydrothermal Vent Sediment	27.010833N/111.415556W	k__Bacteria (UID2495)	2993	147	91	45	100	2	0	0	0	72.55	2.2	50	d__Bacteria;p__Gemmatimonadota;c__Gemmatimonadetes;o__Gemmatimonadales;f__GWC2-71-9;g__WVYX01;s__	N/A	N/A	N/A	N/A	N/A	GCA_011772755.1	95	d__Bacteria;p__Gemmatimonadota;c__Gemmatimonadetes;o__Gemmatimonadales;f__GWC2-71-9;g__WVYX01;s__WVYX01 sp011772755	75.38	0.04	d__Bacteria;p__Gemmatimonadota;c__Gemmatimonadetes;o__Gemmatimonadales;f__GWC2-71-9;g__;s__	taxonomic classification defined by topology and ANI	N/A	N/A	65.91
	Meg19_46_Bin_59	Group3	N	Yes	Gemmatimonadetes	d__Bacteria;p__Gemmatimonadota;c__Gemmatimonadetes;o__KS3-K002;f__JABDQB01;g__;s__	N	1.74535	3.11004	326	25495	6382	59.35	1977	1745352	2024	5353.8	Guaymas Basin Megamat19, Mexico	Hydrothermal Vent Sediment	27.010833N/111.415556W	k__Bacteria (UID2495)	2993	147	91	58	79	9	1	0	0	56.12	9.09	33.33	d__Bacteria;p__Gemmatimonadota;c__Gemmatimonadetes;o__KS3-K002;f__JABDQB01;g__;s__	N/A	N/A	N/A	N/A	N/A	GCA_013042495.1	95	d__Bacteria;p__Gemmatimonadota;c__Gemmatimonadetes;o__KS3-K002;f__JABDQB01;g__JABDQB01;s__JABDQB01 sp013042495	76.7	0.02	d__Bacteria;p__Gemmatimonadota;c__Gemmatimonadetes;o__KS3-K002;f__JABDQB01;g__;s__	taxonomic classification defined by topology and ANI	N/A	N/A	47.75
	Meg19_46_Bin_6	Group3	N	Yes	Gemmatimonadetes	d__Bacteria;p__Gemmatimonadota;c__Gemmatimonadetes;o__KS3-K002;f__JABDQB01;g__;s__	N	2.10673	3.47186	654	13157	3139	65	2438	2106727	2000	3221.3	Guaymas Basin Megamat19, Mexico	Hydrothermal Vent Sediment	27.010833N/111.415556W	k__Bacteria (UID2495)	2993	147	91	60	81	6	0	0	0	60.68	6.59	66.67	d__Bacteria;p__Gemmatimonadota;c__Gemmatimonadetes;o__KS3-K002;f__JABDQB01;g__;s__	N/A	N/A	N/A	N/A	N/A	GCA_013042495.1	95	d__Bacteria;p__Gemmatimonadota;c__Gemmatimonadetes;o__KS3-K002;f__JABDQB01;g__JABDQB01;s__JABDQB01 sp013042495	76.92	0.09	d__Bacteria;p__Gemmatimonadota;c__Gemmatimonadetes;o__KS3-K002;f__JABDQB01;g__;s__	taxonomic classification defined by topology and ANI	N/A	N/A	41.55
	Meg19_46_Bin_99	Group4	N	Yes	Gemmatimonadetes	d__Bacteria;p__Gemmatimonadota;c__Gemmatimonadetes;o__Longimicrobiales;f__UBA6960;g__;s__	N	3.15313	5.62355	859	18647	3790	64.2	3409	3153125	2000	3670.7	Guaymas Basin Megamat19, Mexico	Hydrothermal Vent Sediment	27.010833N/111.415556W	k__Bacteria (UID2495)	2993	147	91	62	78	7	0	0	0	56.07	6.04	0	d__Bacteria;p__Gemmatimonadota;c__Gemmatimonadetes;o__Longimicrobiales;f__UBA6960;g__;s__	N/A	N/A	N/A	N/A	N/A	N/A	N/A	N/A	N/A	N/A	d__Bacteria;p__Gemmatimonadota;c__Gemmatimonadetes;o__Longimicrobiales;f__UBA6960;g__;s__	taxonomic classification fully defined by topology	N/A	N/A	50.7
	Meg22_02_Bin_135	Group3	Y	Yes	Gemmatimonadetes	d__Bacteria;p__Gemmatimonadota;c__Gemmatimonadetes;o__KS3-K002;f__JABDQB01;g__JABDQB01;s__	N	3.03338	3.45056	493	43150	7927	65.01	3092	3033383	2002	6152.9	Guaymas Basin Megamat22, Mexico	Hydrothermal Vent Sediment	27.010833N/111.415556W	k__Bacteria (UID2495)	2993	147	91	12	129	6	0	0	0	87.91	4.6	16.67	d__Bacteria;p__Gemmatimonadota;c__Gemmatimonadetes;o__KS3-K002;f__JABDQB01;g__JABDQB01;s__	N/A	N/A	N/A	N/A	N/A	GCA_013042495.1	95	d__Bacteria;p__Gemmatimonadota;c__Gemmatimonadetes;o__KS3-K002;f__JABDQB01;g__JABDQB01;s__JABDQB01 sp013042495	80.82	0.55	d__Bacteria;p__Gemmatimonadota;c__Gemmatimonadetes;o__KS3-K002;f__JABDQB01;g__;s__	taxonomic classification defined by topology and ANI	N/A	N/A	80.8
	Meg22_02_Bin_58	Group2	N	Yes	Gemmatimonadetes	d__Bacteria;p__Gemmatimonadota;c__Gemmatimonadetes;o__Gemmatimonadales;f__GWC2-71-9;g__N074bin45;s__	N	3.22945	4.1192	666	44306	5570	63.1	3507	3229450	2004	4849	Guaymas Basin Megamat22, Mexico	Hydrothermal Vent Sediment	27.010833N/111.415556W	k__Bacteria (UID2495)	2993	147	91	27	112	8	0	0	0	78.4	7.24	87.5	d__Bacteria;p__Gemmatimonadota;c__Gemmatimonadetes;o__Gemmatimonadales;f__GWC2-71-9;g__N074bin45;s__	N/A	N/A	N/A	N/A	N/A	GCA_004357415.1	95	d__Bacteria;p__Gemmatimonadota;c__Gemmatimonadetes;o__Gemmatimonadales;f__GWC2-71-9;g__N074bin45;s__N074bin45 sp004357415	83.13	0.58	d__Bacteria;p__Gemmatimonadota;c__Gemmatimonadetes;o__Gemmatimonadales;f__GWC2-71-9;g__;s__	taxonomic classification defined by topology and ANI	N/A	N/A	69.57
	Meg22_02_Bin_61	Group4	N	Yes	Gemmatimonadetes	d__Bacteria;p__Gemmatimonadota;c__Gemmatimonadetes;o__Longimicrobiales;f__UBA6960;g__JABDNZ01;s__	N	3.6395	4.70767	804	27013	5037	60.44	3718	3639503	2003	4526.7	Guaymas Basin Megamat22, Mexico	Hydrothermal Vent Sediment	27.010833N/111.415556W	k__Bacteria (UID2495)	2993	147	91	25	116	6	0	0	0	77.31	6.59	0	d__Bacteria;p__Gemmatimonadota;c__Gemmatimonadetes;o__Longimicrobiales;f__UBA6960;g__JABDNZ01;s__	N/A	N/A	N/A	N/A	N/A	GCA_013043565.1	95	d__Bacteria;p__Gemmatimonadota;c__Gemmatimonadetes;o__Longimicrobiales;f__UBA6960;g__JABDNZ01;s__JABDNZ01 sp013043565	77.43	0.21	d__Bacteria;p__Gemmatimonadota;c__Gemmatimonadetes;o__Longimicrobiales;f__UBA6960;g__;s__	taxonomic classification defined by topology and ANI	N/A	N/A	68.14
	Meg22_02_Bin_96	Group2	N	Yes	Gemmatimonadetes	d__Bacteria;p__Gemmatimonadota;c__Gemmatimonadetes;o__Gemmatimonadales;f__GWC2-71-9;g__WVYX01;s__	N	1.60515	3.20006	549	9720	2829	57.3	1840	1605149	2001	2923.8	Guaymas Basin Megamat22, Mexico	Hydrothermal Vent Sediment	27.010833N/111.415556W	k__Bacteria (UID2495)	2993	147	91	59	79	9	0	0	0	50.16	7.14	11.11	d__Bacteria;p__Gemmatimonadota;c__Gemmatimonadetes;o__Gemmatimonadales;f__GWC2-71-9;g__WVYX01;s__	N/A	N/A	N/A	N/A	N/A	GCA_011772755.1	95	d__Bacteria;p__Gemmatimonadota;c__Gemmatimonadetes;o__Gemmatimonadales;f__GWC2-71-9;g__WVYX01;s__WVYX01 sp011772755	75.3	0.02	d__Bacteria;p__Gemmatimonadota;c__Gemmatimonadetes;o__Gemmatimonadales;f__GWC2-71-9;g__;s__	taxonomic classification defined by topology and ANI	N/A	N/A	43.14
	Meg22_24_Bin_123	Group2	N	Yes	Gemmatimonadetes	d__Bacteria;p__Gemmatimonadota;c__Gemmatimonadetes;o__Gemmatimonadales;f__GWC2-71-9;g__N074bin45;s__	N	2.92776	4.16289	665	26348	4771	62.98	3326	2927764	2008	4402.7	Guaymas Basin Megamat22, Mexico	Hydrothermal Vent Sediment	27.010833N/111.415556W	k__Bacteria (UID2495)	2993	147	91	30	116	1	0	0	0	70.33	1.1	0	d__Bacteria;p__Gemmatimonadota;c__Gemmatimonadetes;o__Gemmatimonadales;f__GWC2-71-9;g__N074bin45;s__	N/A	N/A	N/A	N/A	N/A	GCA_004357415.1	95	d__Bacteria;p__Gemmatimonadota;c__Gemmatimonadetes;o__Gemmatimonadales;f__GWC2-71-9;g__N074bin45;s__N074bin45 sp004357415	83.16	0.47	d__Bacteria;p__Gemmatimonadota;c__Gemmatimonadetes;o__Gemmatimonadales;f__GWC2-71-9;g__;s__	taxonomic classification defined by topology and ANI	N/A	N/A	61.56
	Meg22_24_Bin_152	Group4	N	Yes	Gemmatimonadetes	d__Bacteria;p__Gemmatimonadota;c__Gemmatimonadetes;o__Longimicrobiales;f__UBA6960;g__JABDNZ01;s__	N	3.00243	4.14357	484	39319	7723	60.15	2959	3002433	2000	6203.4	Guaymas Basin Megamat22, Mexico	Hydrothermal Vent Sediment	27.010833N/111.415556W	k__Bacteria (UID2495)	2993	147	91	32	112	3	0	0	0	72.46	2.3	33.33	d__Bacteria;p__Gemmatimonadota;c__Gemmatimonadetes;o__Longimicrobiales;f__UBA6960;g__JABDNZ01;s__	N/A	N/A	N/A	N/A	N/A	GCA_013043565.1	95	d__Bacteria;p__Gemmatimonadota;c__Gemmatimonadetes;o__Longimicrobiales;f__UBA6960;g__JABDNZ01;s__JABDNZ01 sp013043565	77.61	0.23	d__Bacteria;p__Gemmatimonadota;c__Gemmatimonadetes;o__Longimicrobiales;f__UBA6960;g__;s__	taxonomic classification defined by topology and ANI	N/A	N/A	66.85
	Meg22_24_Bin_163	Group3	N	Yes	Gemmatimonadetes	d__Bacteria;p__Gemmatimonadota;c__Gemmatimonadetes;o__KS3-K002;f__JABDQB01;g__JABDQB01;s__	N	3.16055	3.59766	486	36908	8604	65.05	3217	3160548	2007	6503.2	Guaymas Basin Megamat22, Mexico	Hydrothermal Vent Sediment	27.010833N/111.415556W	k__Bacteria (UID2495)	2993	147	91	14	129	3	1	0	0	87.85	5.49	0	d__Bacteria;p__Gemmatimonadota;c__Gemmatimonadetes;o__KS3-K002;f__JABDQB01;g__JABDQB01;s__	N/A	N/A	N/A	N/A	N/A	GCA_013042495.1	95	d__Bacteria;p__Gemmatimonadota;c__Gemmatimonadetes;o__KS3-K002;f__JABDQB01;g__JABDQB01;s__JABDQB01 sp013042495	80.74	0.59	d__Bacteria;p__Gemmatimonadota;c__Gemmatimonadetes;o__KS3-K002;f__JABDQB01;g__;s__	taxonomic classification defined by topology and ANI	N/A	N/A	78.78
	Meg22_24_Bin_194	Group3	N	Yes	Gemmatimonadetes	d__Bacteria;p__Gemmatimonadota;c__Gemmatimonadetes;o__KS3-K002;f__JABDQB01;g__JABDQB01;s__	N	2.40584	3.85427	667	19996	3735	65.06	2758	2405835	2000	3606.9	Guaymas Basin Megamat22, Mexico	Hydrothermal Vent Sediment	27.010833N/111.415556W	k__Bacteria (UID2495)	2993	147	91	57	80	10	0	0	0	62.42	7.71	60	d__Bacteria;p__Gemmatimonadota;c__Gemmatimonadetes;o__KS3-K002;f__JABDQB01;g__JABDQB01;s__	N/A	N/A	N/A	N/A	N/A	GCA_013042495.1	95	d__Bacteria;p__Gemmatimonadota;c__Gemmatimonadetes;o__KS3-K002;f__JABDQB01;g__JABDQB01;s__JABDQB01 sp013042495	78.01	0.29	d__Bacteria;p__Gemmatimonadota;c__Gemmatimonadetes;o__KS3-K002;f__JABDQB01;g__;s__	taxonomic classification defined by topology and ANI	N/A	N/A	50.7
	Meg22_24_Bin_22	Group4	N	Yes	Gemmatimonadetes	d__Bacteria;p__Gemmatimonadota;c__Gemmatimonadetes;o__Longimicrobiales;f__UBA6960;g__JABDNZ01;s__	N	2.85146	4.76753	757	18745	3985	60.75	2996	2851460	2002	3766.8	Guaymas Basin Megamat22, Mexico	Hydrothermal Vent Sediment	27.010833N/111.415556W	k__Bacteria (UID2495)	2993	147	91	64	75	8	0	0	0	59.81	6.59	25	d__Bacteria;p__Gemmatimonadota;c__Gemmatimonadetes;o__Longimicrobiales;f__UBA6960;g__JABDNZ01;s__	N/A	N/A	N/A	N/A	N/A	GCA_013043565.1	95	d__Bacteria;p__Gemmatimonadota;c__Gemmatimonadetes;o__Longimicrobiales;f__UBA6960;g__JABDNZ01;s__JABDNZ01 sp013043565	77.41	0.16	d__Bacteria;p__Gemmatimonadota;c__Gemmatimonadetes;o__Longimicrobiales;f__UBA6960;g__;s__	taxonomic classification defined by topology and ANI	N/A	N/A	44.49
	Meg22_46_Bin_203	Group3	N	Yes	Gemmatimonadetes	d__Bacteria;p__Gemmatimonadota;c__Gemmatimonadetes;o__KS3-K002;f__JABDQB01;g__;s__	N	2.31059	2.79158	347	39269	8926	59.25	2493	2310594	2005	6658.8	Guaymas Basin Megamat22, Mexico	Hydrothermal Vent Sediment	27.010833N/111.415556W	k__Bacteria (UID2495)	2993	147	91	18	122	7	0	0	0	82.77	5.69	57.14	d__Bacteria;p__Gemmatimonadota;c__Gemmatimonadetes;o__KS3-K002;f__JABDQB01;g__;s__	N/A	N/A	N/A	N/A	N/A	GCA_013042495.1	95	d__Bacteria;p__Gemmatimonadota;c__Gemmatimonadetes;o__KS3-K002;f__JABDQB01;g__JABDQB01;s__JABDQB01 sp013042495	77.19	0.03	d__Bacteria;p__Gemmatimonadota;c__Gemmatimonadetes;o__KS3-K002;f__JABDQB01;g__;s__	taxonomic classification defined by topology and ANI	N/A	N/A	78.68
	Meg22_46_Bin_250	Group2	N	Yes	Gemmatimonadetes	d__Bacteria;p__Gemmatimonadota;c__Gemmatimonadetes;o__Gemmatimonadales;f__GWC2-71-9;g__N074bin45;s__	N	2.76331	3.69773	611	23286	5166	63.13	3007	2763314	2001	4522.6	Guaymas Basin Megamat22, Mexico	Hydrothermal Vent Sediment	27.010833N/111.415556W	k__Bacteria (UID2495)	2993	147	91	28	119	0	0	0	0	74.73	0	0	d__Bacteria;p__Gemmatimonadota;c__Gemmatimonadetes;o__Gemmatimonadales;f__GWC2-71-9;g__N074bin45;s__	N/A	N/A	N/A	N/A	N/A	GCA_004357415.1	95	d__Bacteria;p__Gemmatimonadota;c__Gemmatimonadetes;o__Gemmatimonadales;f__GWC2-71-9;g__N074bin45;s__N074bin45 sp004357415	83.11	0.53	d__Bacteria;p__Gemmatimonadota;c__Gemmatimonadetes;o__Gemmatimonadales;f__GWC2-71-9;g__;s__	taxonomic classification defined by topology and ANI	N/A	N/A	68.79
	Meg22_46_Bin_67	Group3	N	Yes	Gemmatimonadetes	d__Bacteria;p__Gemmatimonadota;c__Gemmatimonadetes;o__KS3-K002;f__JABDQB01;g__JABDQB01;s__	N	3.35667	3.60544	594	38844	6955	65.01	3499	3356666	2001	5651	Guaymas Basin Megamat22, Mexico	Hydrothermal Vent Sediment	27.010833N/111.415556W	k__Bacteria (UID203)	5449	104	58	5	86	11	2	0	0	93.1	5.75	23.53	d__Bacteria;p__Gemmatimonadota;c__Gemmatimonadetes;o__KS3-K002;f__JABDQB01;g__JABDQB01;s__	N/A	N/A	N/A	N/A	N/A	GCA_013042495.1	95	d__Bacteria;p__Gemmatimonadota;c__Gemmatimonadetes;o__KS3-K002;f__JABDQB01;g__JABDQB01;s__JABDQB01 sp013042495	80.55	0.59	d__Bacteria;p__Gemmatimonadota;c__Gemmatimonadetes;o__KS3-K002;f__JABDQB01;g__;s__	taxonomic classification defined by topology and ANI	N/A	N/A	75.52
	SY70-4-3_Bin_34	Group4	N	Yes	Gemmatimonadetes	d__Bacteria;p__Gemmatimonadota;c__Gemmatimonadetes;o__Longimicrobiales;f__UBA6960;g__JABDNZ01;s__	N	3.13592	4.15574	813	16749	4005	61.5	3312	3135925	2002	3857.2	Haima Cold Seep SY70-4, China	Cold Seep Sediment	16.73N/110.47E	k__Bacteria (UID2495)	2993	147	91	26	120	1	0	0	0	75.46	1.1	0	d__Bacteria;p__Gemmatimonadota;c__Gemmatimonadetes;o__Longimicrobiales;f__UBA6960;g__JABDNZ01;s__	N/A	N/A	N/A	N/A	N/A	GCA_013043565.1	95	d__Bacteria;p__Gemmatimonadota;c__Gemmatimonadetes;o__Longimicrobiales;f__UBA6960;g__JABDNZ01;s__JABDNZ01 sp013043565	77.88	0.24	d__Bacteria;p__Gemmatimonadota;c__Gemmatimonadetes;o__Longimicrobiales;f__UBA6960;g__;s__	taxonomic classification defined by topology and ANI	N/A	N/A	71.13
	SY70-5-5_Bin_57	Group4	N	Yes	Gemmatimonadetes	d__Bacteria;p__Gemmatimonadota;c__Gemmatimonadetes;o__Longimicrobiales;f__UBA6960;g__JABDNZ01;s__	N	3.19993	4.48483	742	19776	4709	61.47	3393	3199927	2003	4312.6	Haima Cold Seep SY70-5, China	Cold Seep Sediment	16.73N/110.47E	k__Bacteria (UID2495)	2993	147	91	37	104	6	0	0	0	71.35	5.59	0	d__Bacteria;p__Gemmatimonadota;c__Gemmatimonadetes;o__Longimicrobiales;f__UBA6960;g__JABDNZ01;s__	N/A	N/A	N/A	N/A	N/A	GCA_013043565.1	95	d__Bacteria;p__Gemmatimonadota;c__Gemmatimonadetes;o__Longimicrobiales;f__UBA6960;g__JABDNZ01;s__JABDNZ01 sp013043565	77.79	0.28	d__Bacteria;p__Gemmatimonadota;c__Gemmatimonadetes;o__Longimicrobiales;f__UBA6960;g__;s__	taxonomic classification defined by topology and ANI	N/A	N/A	57.2
	SY70-5-5_Bin_72	Group4	N	Yes	Gemmatimonadetes	d__Bacteria;p__Gemmatimonadota;c__Gemmatimonadetes;o__Longimicrobiales;f__UBA6960;g__JABDNZ01;s__	N	2.41173	3.78607	649	23437	3808	63.48	2539	2411729	2001	3716.1	Haima Cold Seep SY70-5, China	Cold Seep Sediment	16.73N/110.47E	k__Bacteria (UID2495)	2993	147	91	42	102	3	0	0	0	63.7	3.3	0	d__Bacteria;p__Gemmatimonadota;c__Gemmatimonadetes;o__Longimicrobiales;f__UBA6960;g__JABDNZ01;s__	N/A	N/A	N/A	N/A	N/A	GCA_013043565.1	95	d__Bacteria;p__Gemmatimonadota;c__Gemmatimonadetes;o__Longimicrobiales;f__UBA6960;g__JABDNZ01;s__JABDNZ01 sp013043565	77.27	0.19	d__Bacteria;p__Gemmatimonadota;c__Gemmatimonadetes;o__Longimicrobiales;f__UBA6960;g__;s__	taxonomic classification defined by topology and ANI	N/A	N/A	56.96
	SY72-5-1_Bin_1	Group3	Y	Yes	Gemmatimonadetes	d__Bacteria;p__Gemmatimonadota;c__Gemmatimonadetes;o__KS3-K002;f__JABDQB01;g__;s__	N	2.71419	2.83912	304	98530	14308	66.55	2684	2714194	2003	8928.3	Haima Cold Seep SY70-5, China	Cold Seep Sediment	16.73N/110.47E	k__Bacteria (UID2495)	2993	147	91	4	136	6	1	0	0	95.6	4.8	44.44	d__Bacteria;p__Gemmatimonadota;c__Gemmatimonadetes;o__KS3-K002;f__JABDQB01;g__;s__	N/A	N/A	N/A	N/A	N/A	N/A	N/A	N/A	N/A	N/A	d__Bacteria;p__Gemmatimonadota;c__Gemmatimonadetes;o__KS3-K002;f__JABDQB01;g__;s__	taxonomic novelty determined using RED	N/A	N/A	89.34
	TC87O_Bin_23	Group2	N	Yes	Gemmatimonadetes	d__Bacteria;p__Gemmatimonadota;c__Gemmatimonadetes;o__Gemmatimonadales;f__GWC2-71-9;g__;s__	N	4.29786	5.06107	817	46831	6468	56.86	4460	4297861	2004	5260.5	Longqi Vent, Southwest Indian Ocean	Hydrothermal Vent Oxide	37.78021S/49.64818E	k__Bacteria (UID2495)	2993	147	91	21	119	7	0	0	0	84.92	6.14	57.14	d__Bacteria;p__Gemmatimonadota;c__Gemmatimonadetes;o__Gemmatimonadales;f__GWC2-71-9;g__;s__	N/A	N/A	N/A	N/A	N/A	N/A	N/A	N/A	N/A	N/A	d__Bacteria;p__Gemmatimonadota;c__Gemmatimonadetes;o__Gemmatimonadales;f__GWC2-71-9;g__;s__	taxonomic classification fully defined by topology	N/A	N/A	79.25
	TC87O_Bin_5	Group3	N	Yes	Gemmatimonadetes	d__Bacteria;p__Gemmatimonadota;c__Gemmatimonadetes;o__KS3-K002;f__JABDQB01;g__;s__	N	3.7372	4.0728	482	70904	11032	62.44	4035	3737200	2011	7753.5	Longqi Vent, Southwest Indian Ocean	Hydrothermal Vent Oxide	37.78021S/49.64818E	k__Bacteria (UID2495)	2993	147	91	8	127	12	0	0	0	91.76	6.19	8.33	d__Bacteria;p__Gemmatimonadota;c__Gemmatimonadetes;o__KS3-K002;f__JABDQB01;g__;s__	N/A	N/A	N/A	N/A	N/A	GCA_013042495.1	95	d__Bacteria;p__Gemmatimonadota;c__Gemmatimonadetes;o__KS3-K002;f__JABDQB01;g__JABDQB01;s__JABDQB01 sp013042495	76.17	0.04	d__Bacteria;p__Gemmatimonadota;c__Gemmatimonadetes;o__KS3-K002;f__JABDQB01;g__;s__	taxonomic classification defined by topology and ANI	N/A	N/A	82.35
GCA_000010305	Gemmatimonas_aurantiaca_T-27	Group2	Y	NO	Gemmatimonadetes	d__Bacteria;p__Gemmatimonadota;c__Gemmatimonadetes;o__Gemmatimonadales;f__Gemmatimonadaceae;g__Gemmatimonas;s__Gemmatimonas	NA	4.63696	4.68854	1	4636964	4636964	64.27	4004	4636964	4636964	4636964	Anaerobic–aerobic sequential batch waster treatment reactor	Engineered System	Unknown	k__Bacteria (UID2495)	2993	147	91	1	142	4	0	0	0	98.9	4.4	0	d__Bacteria;p__Gemmatimonadota;c__Gemmatimonadetes;o__Gemmatimonadales;f__Gemmatimonadaceae;g__Gemmatimonas;s__Gemmatimonas aurantiaca	GCF_000010305.1	95	d__Bacteria;p__Gemmatimonadota;c__Gemmatimonadetes;o__Gemmatimonadales;f__Gemmatimonadaceae;g__Gemmatimonas;s__Gemmatimonas aurantiaca	100	1	GCF_000010305.1	95	d__Bacteria;p__Gemmatimonadota;c__Gemmatimonadetes;o__Gemmatimonadales;f__Gemmatimonadaceae;g__Gemmatimonas;s__Gemmatimonas aurantiaca	100	1	d__Bacteria;p__Gemmatimonadota;c__Gemmatimonadetes;o__Gemmatimonadales;f__Gemmatimonadaceae;g__Gemmatimonas;s__	taxonomic classification defined by topology and ANI	topological placement and ANI have congruent species assignments	GCA_002483225.1, s__Gemmatimonas sp002483225, 95.0, 79.29, 0.38; GCF_000695095.2, s__Gemmatimonas phototrophica, 95.0, 78.85, 0.29; GCA_002331565.1, s__Gemmatimonas sp002331565, 95.0, 78.77, 0.44; GCF_013004105.1, s__Gemmatimonas sp013004105, 95.0, 78.76, 0.31; GCA_903900795.1, s__Gemmatimonas sp903900795, 95.0, 78.47, 0.33; GCA_002737115.1, s__Gemmatimonas sp002737115, 95.0, 78.32, 0.37; GCA_903…	91.68
GCA_000522985	Gemmatirosa_kalamazoonesis_strain_KBS708	Group2	Y	NO	Gemmatimonadetes	d__Bacteria;p__Gemmatimonadota;c__Gemmatimonadetes;o__Gemmatimonadales;f__Gemmatimonadaceae;g__Gemmatirosa;s__Gemmatirosa	NA	7.47921	7.60469	4	5311527	5311527	72.61	6375	7479215	20952	1.8698e+06	Unknown	Other	Unknown	k__Bacteria (UID2495)	2993	147	91	2	143	2	0	0	0	98.35	2.2	0	d__Bacteria;p__Gemmatimonadota;c__Gemmatimonadetes;o__Gemmatimonadales;f__Gemmatimonadaceae;g__Gemmatirosa;s__Gemmatirosa kalamazoonesis	GCF_000522985.1	95	d__Bacteria;p__Gemmatimonadota;c__Gemmatimonadetes;o__Gemmatimonadales;f__Gemmatimonadaceae;g__Gemmatirosa;s__Gemmatirosa kalamazoonesis	100	0.99	GCF_000522985.1	95	d__Bacteria;p__Gemmatimonadota;c__Gemmatimonadetes;o__Gemmatimonadales;f__Gemmatimonadaceae;g__Gemmatirosa;s__Gemmatirosa kalamazoonesis	100	0.99	d__Bacteria;p__Gemmatimonadota;c__Gemmatimonadetes;o__Gemmatimonadales;f__Gemmatimonadaceae;g__;s__	taxonomic classification defined by topology and ANI	topological placement and ANI have congruent species assignments	N/A	93.09
GCA_000695095	Gemmatimonas_phototrophica_strain_AP64	Group2	Y	NO	Gemmatimonadetes	d__Bacteria;p__Gemmatimonadota;c__Gemmatimonadetes;o__Gemmatimonadales;f__Gemmatimonadaceae;g__Gemmatimonas;s__Gemmatimonas	NA	4.71655	4.76901	1	4716552	4716552	64.37	3963	4716552	4716552	4716552	Swan Lake, Western Gobi Desert, China	Freshwater	42.005N/101.585E	k__Bacteria (UID2495)	2993	147	91	1	143	3	0	0	0	98.9	3.3	0	d__Bacteria;p__Gemmatimonadota;c__Gemmatimonadetes;o__Gemmatimonadales;f__Gemmatimonadaceae;g__Gemmatimonas;s__Gemmatimonas phototrophica	GCF_000695095.2	95	d__Bacteria;p__Gemmatimonadota;c__Gemmatimonadetes;o__Gemmatimonadales;f__Gemmatimonadaceae;g__Gemmatimonas;s__Gemmatimonas phototrophica	100	1	GCF_000695095.2	95	d__Bacteria;p__Gemmatimonadota;c__Gemmatimonadetes;o__Gemmatimonadales;f__Gemmatimonadaceae;g__Gemmatimonas;s__Gemmatimonas phototrophica	100	1	d__Bacteria;p__Gemmatimonadota;c__Gemmatimonadetes;o__Gemmatimonadales;f__Gemmatimonadaceae;g__Gemmatimonas;s__	taxonomic classification defined by topology and ANI	topological placement and ANI have congruent species assignments	GCA_002331565.1, s__Gemmatimonas sp002331565, 95.0, 79.97, 0.59; GCA_002483225.1, s__Gemmatimonas sp002483225, 95.0, 79.28, 0.37; GCF_000010305.1, s__Gemmatimonas aurantiaca, 95.0, 78.85, 0.29; GCA_002737115.1, s__Gemmatimonas sp002737115, 95.0, 78.64, 0.38; GCF_013004105.1, s__Gemmatimonas sp013004105, 95.0, 78.45, 0.32; GCA_903900795.1, s__Gemmatimonas sp903900795, 95.0, 78.39, 0.36; GCA_903894…	92.61
GCA_001303165	Gemmatimonas_sp_SG8_28	Group2	N	NO	Gemmatimonadetes	d__Bacteria;p__Gemmatimonadota;c__Gemmatimonadetes;o__Gemmatimonadales;f__GWC2-71-9;g__WVYX01;s__	NA	3.85651	5.08372	430	46899	9214	67.18	3676	3856507	5000	8968.6	White Oak River Estuary, USA	Lake Sediment	34.7414N/77.1234W	k__Bacteria (UID2495)	2993	147	91	34	106	7	0	0	0	75.86	6.69	0	d__Bacteria;p__Gemmatimonadota;c__Gemmatimonadetes;o__Gemmatimonadales;f__GWC2-71-9;g__WVYX01;s__	N/A	N/A	N/A	N/A	N/A	GCA_011772755.1	95	d__Bacteria;p__Gemmatimonadota;c__Gemmatimonadetes;o__Gemmatimonadales;f__GWC2-71-9;g__WVYX01;s__WVYX01 sp011772755	76.53	0.12	d__Bacteria;p__Gemmatimonadota;c__Gemmatimonadetes;o__Gemmatimonadales;f__GWC2-71-9;g__;s__	taxonomic classification defined by topology and ANI	N/A	N/A	54.79
GCA_001724275	Gemmatimonadetes_bacterium_SCN	Group2	Y	NO	Gemmatimonadetes	d__Bacteria;p__Gemmatimonadota;c__Gemmatimonadetes;o__Gemmatimonadales;f__Gemmatimonadaceae;g__SCN-70-22;s__SCN-70-22	NA	4.69747	4.80314	84	358948	101991	70.18	3982	4697473	5400	55922.3	University of Cape Town, South Africa	Engineered System	33.96S/18.46E	k__Bacteria (UID2495)	2993	147	91	3	140	4	0	0	0	97.8	4.4	0	d__Bacteria;p__Gemmatimonadota;c__Gemmatimonadetes;o__Gemmatimonadales;f__Gemmatimonadaceae;g__SCN-70-22;s__SCN-70-22 sp001724275	GCA_001724275.1	95	d__Bacteria;p__Gemmatimonadota;c__Gemmatimonadetes;o__Gemmatimonadales;f__Gemmatimonadaceae;g__SCN-70-22;s__SCN-70-22 sp001724275	100	1	GCA_001724275.1	95	d__Bacteria;p__Gemmatimonadota;c__Gemmatimonadetes;o__Gemmatimonadales;f__Gemmatimonadaceae;g__SCN-70-22;s__SCN-70-22 sp001724275	100	1	d__Bacteria;p__Gemmatimonadota;c__Gemmatimonadetes;o__Gemmatimonadales;f__Gemmatimonadaceae;g__SCN-70-22;s__	taxonomic classification defined by topology and ANI	topological placement and ANI have congruent species assignments	GCA_014379705.1, s__SCN-70-22 sp014379705, 95.0, 77.38, 0.24; GCA_902826615.1, s__SCN-70-22 sp902826615, 95.0, 77.07, 0.22	90.07
GCA_001802015	Gemmatimonadetes_bacterium_GWC2_71_9	Group2	N	NO	Gemmatimonadetes	d__Bacteria;p__Gemmatimonadota;c__Gemmatimonadetes;o__Gemmatimonadales;f__GWC2-71-9;g__;s__	NA	2.22728	3.36701	172	72238	14866	69.88	2263	2227275	4716	12949.3	Rifle, USA	Lake Sediment	39.5369N/107.7828W	k__Bacteria (UID2495)	2993	147	91	51	95	1	0	0	0	66.15	1.1	0	d__Bacteria;p__Gemmatimonadota;c__Gemmatimonadetes;o__Gemmatimonadales;f__GWC2-71-9;g__;s__	N/A	N/A	N/A	N/A	N/A	GCA_003157095.1	95	d__Bacteria;p__Gemmatimonadota;c__Gemmatimonadetes;o__Gemmatimonadales;f__GWC2-71-9;g__Fen-1245;s__Fen-1245 sp003157095	78.09	0.31	d__Bacteria;p__Gemmatimonadota;c__Gemmatimonadetes;o__Gemmatimonadales;f__GWC2-71-9;g__;s__	taxonomic classification defined by topology and ANI	N/A	N/A	62.95
GCA_001802045	Gemmatimonadetes_bacterium_RBG_16_66_8	Group2	N	NO	Gemmatimonadetes	d__Bacteria;p__Gemmatimonadota;c__Gemmatimonadetes;o__Gemmatimonadales;f__GWC2-71-9;g__HRBIN33;s__	NA	2.64574	4.45035	276	54182	10663	65	2796	2645735	2520	9586	Rifle, USA	Lake Sediment	39.5369N/107.7828W	k__Bacteria (UID2495)	2993	147	91	54	89	4	0	0	0	59.45	2.33	75	d__Bacteria;p__Gemmatimonadota;c__Gemmatimonadetes;o__Gemmatimonadales;f__GWC2-71-9;g__HRBIN33;s__	N/A	N/A	N/A	N/A	N/A	GCA_002923375.1	95	d__Bacteria;p__Gemmatimonadota;c__Gemmatimonadetes;o__Gemmatimonadales;f__GWC2-71-9;g__HRBIN33;s__HRBIN33 sp002923375	76.34	0.12	d__Bacteria;p__Gemmatimonadota;c__Gemmatimonadetes;o__Gemmatimonadales;f__GWC2-71-9;g__;s__	taxonomic classification defined by topology and ANI	N/A	N/A	54.97
GCA_001802055	Gemmatimonadetes_bacterium_RIFCSPLOWO2_02_FULL_71_11	Group2	N	NO	Gemmatimonadetes	d__Bacteria;p__Gemmatimonadota;c__Gemmatimonadetes;o__Gemmatimonadales;f__GWC2-71-9;g__;s__	NA	1.78252	3.13273	176	28449	11235	69.69	1822	1782525	4859	10128	Rifle, USA	Lake Sediment	39.5369N/107.7828W	k__Bacteria (UID2495)	2993	147	91	58	89	0	0	0	0	56.9	0	0	d__Bacteria;p__Gemmatimonadota;c__Gemmatimonadetes;o__Gemmatimonadales;f__GWC2-71-9;g__;s__	N/A	N/A	N/A	N/A	N/A	GCA_003157095.1	95	d__Bacteria;p__Gemmatimonadota;c__Gemmatimonadetes;o__Gemmatimonadales;f__GWC2-71-9;g__Fen-1245;s__Fen-1245 sp003157095	78.43	0.35	d__Bacteria;p__Gemmatimonadota;c__Gemmatimonadetes;o__Gemmatimonadales;f__GWC2-71-9;g__;s__	taxonomic classification defined by topology and ANI	N/A	N/A	54.56
GCA_001802605	Gemmatimonadetes_bacterium_GWC2_71_10	Group2	N	NO	Gemmatimonadetes	d__Bacteria;p__Gemmatimonadota;c__Gemmatimonadetes;o__Gemmatimonadales;f__GWC2-71-9;g__;s__	NA	2.25924	3.68735	205	52461	12210	69.13	2291	2259237	4634	11020.7	Rifle, USA	Lake Sediment	39.5369N/107.7828W	k__Bacteria (UID2495)	2993	147	91	53	91	3	0	0	0	61.27	2.75	0	d__Bacteria;p__Gemmatimonadota;c__Gemmatimonadetes;o__Gemmatimonadales;f__GWC2-71-9;g__;s__	N/A	N/A	N/A	N/A	N/A	GCA_003157095.1	95	d__Bacteria;p__Gemmatimonadota;c__Gemmatimonadetes;o__Gemmatimonadales;f__GWC2-71-9;g__Fen-1245;s__Fen-1245 sp003157095	77.16	0.27	d__Bacteria;p__Gemmatimonadota;c__Gemmatimonadetes;o__Gemmatimonadales;f__GWC2-71-9;g__;s__	taxonomic classification defined by topology and ANI	N/A	N/A	54.48
GCA_001915025	Gemmatimonadetes_bacterium_13_2_20CM_2_65_7	Group2	Y	NO	Gemmatimonadetes	d__Bacteria;p__Gemmatimonadota;c__Gemmatimonadetes;o__Gemmatimonadales;f__GWC2-71-9;g__20CM-2-65-7;s__20CM-2-65-7	NA	2.6841	3.29661	101	95883	36308	65.07	2625	2684096	4042	26575.2	Angelo Coast Range Reserve, USA	Meadow Soil	39.74N/123.63W	k__Bacteria (UID2495)	2993	147	91	32	115	0	0	0	0	81.42	0	0	d__Bacteria;p__Gemmatimonadota;c__Gemmatimonadetes;o__Gemmatimonadales;f__GWC2-71-9;g__20CM-2-65-7;s__20CM-2-65-7 sp001915025	GCA_001915025.1	95	d__Bacteria;p__Gemmatimonadota;c__Gemmatimonadetes;o__Gemmatimonadales;f__GWC2-71-9;g__20CM-2-65-7;s__20CM-2-65-7 sp001915025	100	0.99	GCA_001915025.1	95	d__Bacteria;p__Gemmatimonadota;c__Gemmatimonadetes;o__Gemmatimonadales;f__GWC2-71-9;g__20CM-2-65-7;s__20CM-2-65-7 sp001915025	100	0.99	d__Bacteria;p__Gemmatimonadota;c__Gemmatimonadetes;o__Gemmatimonadales;f__GWC2-71-9;g__20CM-2-65-7;s__	taxonomic classification defined by topology and ANI	topological placement and ANI have congruent species assignments	GCA_003221825.1, s__20CM-2-65-7 sp003221825, 95.0, 80.06, 0.54; GCA_003222195.1, s__20CM-2-65-7 sp003222195, 95.0, 79.89, 0.6; GCA_003223395.1, s__20CM-2-65-7 sp003223395, 95.0, 79.87, 0.59; GCA_003221985.1, s__20CM-2-65-7 sp003221985, 95.0, 79.82, 0.51; GCA_003220955.1, s__20CM-2-65-7 sp003220955, 95.0, 79.58, 0.51; GCA_003221895.1, s__20CM-2-65-7 sp003221895, 95.0, 79.52, 0.57; GCA_003221075.1,…	71.77
GCA_001917625	Gemmatimonadetes_bacterium_13_1_40CM_70_15	Group2	N	NO	Gemmatimonadetes	d__Bacteria;p__Gemmatimonadota;c__Gemmatimonadetes;o__Gemmatimonadales;f__GWC2-71-9;g__13-1-40CM-70-15;s__13-1-40CM-70-15	NA	1.56834	2.42365	104	41615	17387	69.75	1578	1568343	1736	15080.2	Angelo, USA	Meadow Soil	39.74N/123.63W	k__Bacteria (UID2495)	2993	147	91	65	82	0	0	0	0	64.71	0	0	d__Bacteria;p__Gemmatimonadota;c__Gemmatimonadetes;o__Gemmatimonadales;f__GWC2-71-9;g__13-1-40CM-70-15;s__13-1-40CM-70-15 sp003223415	GCA_003223415.1	95	d__Bacteria;p__Gemmatimonadota;c__Gemmatimonadetes;o__Gemmatimonadales;f__GWC2-71-9;g__13-1-40CM-70-15;s__13-1-40CM-70-15 sp003223415	99.3	0.96	GCA_003223415.1	95	d__Bacteria;p__Gemmatimonadota;c__Gemmatimonadetes;o__Gemmatimonadales;f__GWC2-71-9;g__13-1-40CM-70-15;s__13-1-40CM-70-15 sp003223415	99.3	0.96	d__Bacteria;p__Gemmatimonadota;c__Gemmatimonadetes;o__Gemmatimonadales;f__GWC2-71-9;g__;s__	taxonomic classification defined by topology and ANI	topological placement and ANI have congruent species assignments	N/A	55.61
GCA_001919895	Gemmatimonadetes_bacterium_13_1_20CM_4_66_11	Group2	Y	NO	Gemmatimonadetes	d__Bacteria;p__Gemmatimonadota;c__Gemmatimonadetes;o__Gemmatimonadales;f__GWC2-71-9;g__20CM-2-65-7;s__20CM-2-65-7	NA	3.09751	3.5016	120	132690	31113	65.88	3073	3097512	7613	25812.6	Angelo Coast Range Reserve, USA	Meadow Soil	39.74N/123.63W	k__Bacteria (UID2495)	2993	147	91	27	120	0	0	0	0	88.46	0	0	d__Bacteria;p__Gemmatimonadota;c__Gemmatimonadetes;o__Gemmatimonadales;f__GWC2-71-9;g__20CM-2-65-7;s__20CM-2-65-7 sp003222195	GCA_003222195.1	95	d__Bacteria;p__Gemmatimonadota;c__Gemmatimonadetes;o__Gemmatimonadales;f__GWC2-71-9;g__20CM-2-65-7;s__20CM-2-65-7 sp003222195	99.68	0.91	GCA_003222195.1	95	d__Bacteria;p__Gemmatimonadota;c__Gemmatimonadetes;o__Gemmatimonadales;f__GWC2-71-9;g__20CM-2-65-7;s__20CM-2-65-7 sp003222195	99.68	0.91	d__Bacteria;p__Gemmatimonadota;c__Gemmatimonadetes;o__Gemmatimonadales;f__GWC2-71-9;g__20CM-2-65-7;s__	taxonomic classification defined by topology and ANI	topological placement and ANI have congruent species assignments	GCA_003220955.1, s__20CM-2-65-7 sp003220955, 95.0, 93.04, 0.8; GCA_003220985.1, s__20CM-2-65-7 sp003220985, 95.0, 83.44, 0.68; GCA_003221825.1, s__20CM-2-65-7 sp003221825, 95.0, 82.13, 0.69; GCA_003223395.1, s__20CM-2-65-7 sp003223395, 95.0, 82.03, 0.67; GCA_003221075.1, s__20CM-2-65-7 sp003221075, 95.0, 81.53, 0.62; GCA_003221985.1, s__20CM-2-65-7 sp003221985, 95.0, 81.09, 0.57; GCA_003221895.1,…	78.04
GCA_002215645	Gemmatimonadetes_bacterium_2013_60CM_65_52	Group2	Y	NO	Gemmatimonadetes	d__Bacteria;p__Gemmatimonadota;c__Gemmatimonadetes;o__Gemmatimonadales;f__Gemmatimonadaceae;g__AG11;s__AG11	NA	4.20164	4.29615	14	949366	622937	64.99	3717	4201639	20080	300117	Laytonville, California, USA	Meadow Soil	39.74N/123.63W	k__Bacteria (UID2495)	2993	147	91	2	142	3	0	0	0	97.8	3.3	0	d__Bacteria;p__Gemmatimonadota;c__Gemmatimonadetes;o__Gemmatimonadales;f__Gemmatimonadaceae;g__AG11;s__AG11 sp002215645	GCA_002215645.1	95	d__Bacteria;p__Gemmatimonadota;c__Gemmatimonadetes;o__Gemmatimonadales;f__Gemmatimonadaceae;g__AG11;s__AG11 sp002215645	100	1	GCA_002215645.1	95	d__Bacteria;p__Gemmatimonadota;c__Gemmatimonadetes;o__Gemmatimonadales;f__Gemmatimonadaceae;g__AG11;s__AG11 sp002215645	100	1	d__Bacteria;p__Gemmatimonadota;c__Gemmatimonadetes;o__Gemmatimonadales;f__Gemmatimonadaceae;g__AG11;s__	taxonomic classification defined by topology and ANI	topological placement and ANI have congruent species assignments	GCA_013361335.1, s__AG11 sp013361335, 95.0, 78.88, 0.35; GCA_003223455.1, s__AG11 sp003223455, 95.0, 78.27, 0.3; GCA_014378185.1, s__AG11 sp014378185, 95.0, 78.17, 0.34	92.81
GCA_002238865	Gemmatimonadetes_bacterium_bin94	Group4	Y	NO	Gemmatimonadetes	d__Bacteria;p__Gemmatimonadota;c__Gemmatimonadetes;o__Longimicrobiales;f__UBA6960;g__Bin94;s__Bin94	NA	4.42054	4.51998	83	327699	89414	66.9	3696	4420540	1617	53259.5	Marine Biology Station Piran, Slovenia	Seawater	45.5178N/13.5682E	k__Bacteria (UID2495)	2993	147	91	2	142	3	0	0	0	97.8	3.3	0	d__Bacteria;p__Gemmatimonadota;c__Gemmatimonadetes;o__Longimicrobiales;f__UBA6960;g__Bin94;s__Bin94 sp002238865	GCA_002238865.1	95	d__Bacteria;p__Gemmatimonadota;c__Gemmatimonadetes;o__Longimicrobiales;f__UBA6960;g__Bin94;s__Bin94 sp002238865	100	0.99	GCA_002238865.1	95	d__Bacteria;p__Gemmatimonadota;c__Gemmatimonadetes;o__Longimicrobiales;f__UBA6960;g__Bin94;s__Bin94 sp002238865	100	0.99	d__Bacteria;p__Gemmatimonadota;c__Gemmatimonadetes;o__Longimicrobiales;f__UBA6960;g__Bin94;s__	taxonomic classification defined by topology and ANI	topological placement and ANI have congruent species assignments	GCA_009838975.1, s__Bin94 sp009838975, 95.0, 80.01, 0.46; GCA_009841165.1, s__Bin94 sp009841165, 95.0, 79.75, 0.47; GCA_009844885.1, s__Bin94 sp009844885, 95.0, 79.59, 0.48; GCA_009840215.1, s__Bin94 sp009840215, 95.0, 79.3, 0.43; GCA_009841475.1, s__Bin94 sp009841475, 95.0, 79.04, 0.39	92.14
GCA_002291775	Gemmatimonadales_bacterium_UBA1007	Group4	N	NO	Gemmatimonadetes	d__Bacteria;p__Gemmatimonadota;c__Gemmatimonadetes;o__Longimicrobiales;f__UBA6960;g__UBA822;s__	NA	1.62329	2.62287	182	40219	11437	60.12	1608	1623293	2583	8919.2	Saline water, including plankton	Seawater	61.9898S/49.3613W	k__Bacteria (UID2495)	2993	147	91	60	84	3	0	0	0	61.89	2.3	33.33	d__Bacteria;p__Gemmatimonadota;c__Gemmatimonadetes;o__Longimicrobiales;f__UBA6960;g__UBA822;s__	N/A	N/A	N/A	N/A	N/A	N/A	N/A	N/A	N/A	N/A	d__Bacteria;p__Gemmatimonadota;c__Gemmatimonadetes;o__Longimicrobiales;f__UBA6960;g__;s__	taxonomic novelty determined using RED	N/A	N/A	52.83
GCA_002295045	Gemmatimonadales_bacterium_UBA887	Group4	Y	NO	Gemmatimonadetes	d__Bacteria;p__Gemmatimonadota;c__Gemmatimonadetes;o__Longimicrobiales;f__UBA6960;g__UBA1138;s__UBA1138	NA	2.16839	2.65084	235	45507	12617	50.5	2040	2168390	2511	9227.2	Saline water, including plankton	Seawater	Unknown	k__Bacteria (UID2495)	2993	147	91	21	125	1	0	0	0	81.8	1.1	0	d__Bacteria;p__Gemmatimonadota;c__Gemmatimonadetes;o__Longimicrobiales;f__UBA6960;g__UBA1138;s__UBA1138 sp002313925	GCA_002313925.1	95	d__Bacteria;p__Gemmatimonadota;c__Gemmatimonadetes;o__Longimicrobiales;f__UBA6960;g__UBA1138;s__UBA1138 sp002313925	96.27	0.85	GCA_002313925.1	95	d__Bacteria;p__Gemmatimonadota;c__Gemmatimonadetes;o__Longimicrobiales;f__UBA6960;g__UBA1138;s__UBA1138 sp002313925	96.27	0.85	d__Bacteria;p__Gemmatimonadota;c__Gemmatimonadetes;o__Longimicrobiales;f__UBA6960;g__UBA1138;s__	taxonomic classification defined by topology and ANI	topological placement and ANI have congruent species assignments	GCA_002501085.1, s__UBA1138 sp002501085, 95.0, 94.85, 0.87; GCA_012960225.1, s__UBA1138 sp012960225, 95.0, 94.05, 0.93; GCA_002724575.1, s__UBA1138 sp002724575, 95.0, 87.44, 0.79; GCA_002311875.1, s__UBA1138 sp002311875, 95.0, 81.98, 0.84; GCA_003447875.1, s__UBA1138 sp003447875, 95.0, 77.24, 0.09; GCA_009937285.1, s__UBA1138 sp009937285, 95.0, 76.42, 0.03	77.31
GCA_002295625	Gemmatimonadales_bacterium_UBA829	Group4	N	NO	Gemmatimonadetes	d__Bacteria;p__Gemmatimonadota;c__Gemmatimonadetes;o__Longimicrobiales;f__UBA6960;g__UBA2589;s__UBA2589	NA	2.64311	2.84849	93	149597	56322	53.89	2360	2643112	2659	28420.6	Saline water, including plankton	Seawater	61.9898S/49.3613W	k__Bacteria (UID2495)	2993	147	91	9	133	5	0	0	0	92.79	5.49	0	d__Bacteria;p__Gemmatimonadota;c__Gemmatimonadetes;o__Longimicrobiales;f__UBA6960;g__UBA2589;s__UBA2589 sp002348265	GCA_002348265.1	95	d__Bacteria;p__Gemmatimonadota;c__Gemmatimonadetes;o__Longimicrobiales;f__UBA6960;g__UBA2589;s__UBA2589 sp002348265	99.77	0.94	GCA_002348265.1	95	d__Bacteria;p__Gemmatimonadota;c__Gemmatimonadetes;o__Longimicrobiales;f__UBA6960;g__UBA2589;s__UBA2589 sp002348265	99.77	0.94	d__Bacteria;p__Gemmatimonadota;c__Gemmatimonadetes;o__Longimicrobiales;f__UBA6960;g__UBA2589;s__	taxonomic classification defined by topology and ANI	topological placement and ANI have congruent species assignments	GCA_002348465.1, s__UBA2589 sp002348465, 95.0, 93.96, 0.88; GCA_002500925.1, s__UBA2589 sp002500925, 95.0, 91.59, 0.87; GCA_002390225.1, s__UBA2589 sp002390225, 95.0, 76.13, 0.09; GCA_013002885.1, s__UBA2589 sp013002885, 95.0, 76.1, 0.03	85.65
GCA_002295725	Gemmatimonadales_bacterium_UBA822	Group4	Y	NO	Gemmatimonadetes	d__Bacteria;p__Gemmatimonadota;c__Gemmatimonadetes;o__Longimicrobiales;f__UBA6960;g__UBA822;s__UBA822	NA	2.49241	3.06418	309	50470	11025	59.92	2387	2492405	2517	8066	Unknown	Seawater	Unknown	k__Bacteria (UID2495)	2993	147	91	22	123	2	0	0	0	81.34	2.2	0	d__Bacteria;p__Gemmatimonadota;c__Gemmatimonadetes;o__Longimicrobiales;f__UBA6960;g__UBA822;s__UBA822 sp002731735	GCA_002731735.1	95	d__Bacteria;p__Gemmatimonadota;c__Gemmatimonadetes;o__Longimicrobiales;f__UBA6960;g__UBA822;s__UBA822 sp002731735	97.68	0.69	GCA_002731735.1	95	d__Bacteria;p__Gemmatimonadota;c__Gemmatimonadetes;o__Longimicrobiales;f__UBA6960;g__UBA822;s__UBA822 sp002731735	97.68	0.69	d__Bacteria;p__Gemmatimonadota;c__Gemmatimonadetes;o__Longimicrobiales;f__UBA6960;g__UBA822;s__	taxonomic classification defined by topology and ANI	topological placement and ANI have congruent species assignments	GCA_002712565.1, s__UBA822 sp002712565, 95.0, 97.64, 0.51	74.13
GCA_002311435	Gemmatimonadales_bacterium_UBA1138	Group4	N	NO	Gemmatimonadetes	d__Bacteria;p__Gemmatimonadota;c__Gemmatimonadetes;o__Longimicrobiales;f__UBA6960;g__UBA1138;s__UBA1138	NA	4.28734	4.71343	133	287184	68401	63.06	4164	4287337	2613	32235.6	Mid Cayman Rise, Atlantic Ocean	Hydrothermal Vent Plume	18.5467N/81.7183W	k__Bacteria (UID2495)	2993	147	91	11	126	10	0	0	0	90.96	5.82	0	d__Bacteria;p__Gemmatimonadota;c__Gemmatimonadetes;o__Longimicrobiales;f__UBA6960;g__UBA1138;s__UBA1138 sp003447875	GCA_003447875.1	95	d__Bacteria;p__Gemmatimonadota;c__Gemmatimonadetes;o__Longimicrobiales;f__UBA6960;g__UBA1138;s__UBA1138 sp003447875	99.62	0.92	GCA_003447875.1	95	d__Bacteria;p__Gemmatimonadota;c__Gemmatimonadetes;o__Longimicrobiales;f__UBA6960;g__UBA1138;s__UBA1138 sp003447875	99.62	0.92	d__Bacteria;p__Gemmatimonadota;c__Gemmatimonadetes;o__Longimicrobiales;f__UBA6960;g__UBA1138;s__	taxonomic classification defined by topology and ANI	topological placement and ANI have congruent species assignments	GCA_012960225.1, s__UBA1138 sp012960225, 95.0, 77.19, 0.05; GCA_009937285.1, s__UBA1138 sp009937285, 95.0, 77.14, 0.15; GCA_002501085.1, s__UBA1138 sp002501085, 95.0, 76.71, 0.05; GCA_002724575.1, s__UBA1138 sp002724575, 95.0, 76.66, 0.03; GCA_002311875.1, s__UBA1138 sp002311875, 95.0, 76.61, 0.08; GCA_002313925.1, s__UBA1138 sp002313925, 95.0, 76.35, 0.06	81.85
GCA_002313235	Gemmatimonadales_bacterium_UBA1125	Group4	N	NO	Gemmatimonadetes	d__Bacteria;p__Gemmatimonadota;c__Gemmatimonadetes;o__Longimicrobiales;f__UBA6960;g__UBA822;s__	NA	1.52085	2.0675	114	76735	19512	59.94	1503	1520854	2532	13340.8	Saline water, including plankton	Seawater	61.9898S/49.3613W	k__Bacteria (UID2495)	2993	147	91	42	103	2	0	0	0	73.56	2.2	0	d__Bacteria;p__Gemmatimonadota;c__Gemmatimonadetes;o__Longimicrobiales;f__UBA6960;g__UBA822;s__	N/A	N/A	N/A	N/A	N/A	N/A	N/A	N/A	N/A	N/A	d__Bacteria;p__Gemmatimonadota;c__Gemmatimonadetes;o__Longimicrobiales;f__UBA6960;g__;s__	taxonomic novelty determined using RED	N/A	N/A	72.09
GCA_002313925	Gemmatimonadales_bacterium_UBA1120	Group4	N	NO	Gemmatimonadetes	d__Bacteria;p__Gemmatimonadota;c__Gemmatimonadetes;o__Longimicrobiales;f__UBA6960;g__UBA1138;s__UBA1138	NA	2.35027	2.99359	148	100635	24910	52.09	2155	2350269	2506	15880.2	Saline water, including plankton	Seawater	61.9898S/49.3613W	k__Bacteria (UID2495)	2993	147	91	24	121	2	0	0	0	78.51	2.2	0	d__Bacteria;p__Gemmatimonadota;c__Gemmatimonadetes;o__Longimicrobiales;f__UBA6960;g__UBA1138;s__UBA1138 sp002313925	GCA_002313925.1	95	d__Bacteria;p__Gemmatimonadota;c__Gemmatimonadetes;o__Longimicrobiales;f__UBA6960;g__UBA1138;s__UBA1138 sp002313925	100	0.97	GCA_002313925.1	95	d__Bacteria;p__Gemmatimonadota;c__Gemmatimonadetes;o__Longimicrobiales;f__UBA6960;g__UBA1138;s__UBA1138 sp002313925	100	0.97	d__Bacteria;p__Gemmatimonadota;c__Gemmatimonadetes;o__Longimicrobiales;f__UBA6960;g__UBA1138;s__	taxonomic classification defined by topology and ANI	topological placement and ANI have congruent species assignments	GCA_012960225.1, s__UBA1138 sp012960225, 95.0, 94.76, 0.94; GCA_002501085.1, s__UBA1138 sp002501085, 95.0, 94.3, 0.86; GCA_002724575.1, s__UBA1138 sp002724575, 95.0, 87.45, 0.79; GCA_002311875.1, s__UBA1138 sp002311875, 95.0, 82.41, 0.85; GCA_003447875.1, s__UBA1138 sp003447875, 95.0, 76.69, 0.06; GCA_009937285.1, s__UBA1138 sp009937285, 95.0, 76.48, 0.02	76.18
GCA_002331565	Gemmatimonas_sp_UBA2094	Group2	N	NO	Gemmatimonadetes	d__Bacteria;p__Gemmatimonadota;c__Gemmatimonadetes;o__Gemmatimonadales;f__Gemmatimonadaceae;g__Gemmatimonas;s__Gemmatimonas	NA	2.65352	4.22536	243	64915	14441	65.05	2511	2653523	2513	10919.8	Highgate Springs, USA	Freshwater	44.979N/73.105W	k__Bacteria (UID2495)	2993	147	91	57	90	0	0	0	0	62.8	0	0	d__Bacteria;p__Gemmatimonadota;c__Gemmatimonadetes;o__Gemmatimonadales;f__Gemmatimonadaceae;g__Gemmatimonas;s__Gemmatimonas sp002331565	GCA_002331565.1	95	d__Bacteria;p__Gemmatimonadota;c__Gemmatimonadetes;o__Gemmatimonadales;f__Gemmatimonadaceae;g__Gemmatimonas;s__Gemmatimonas sp002331565	100	0.98	GCA_002331565.1	95	d__Bacteria;p__Gemmatimonadota;c__Gemmatimonadetes;o__Gemmatimonadales;f__Gemmatimonadaceae;g__Gemmatimonas;s__Gemmatimonas sp002331565	100	0.98	d__Bacteria;p__Gemmatimonadota;c__Gemmatimonadetes;o__Gemmatimonadales;f__Gemmatimonadaceae;g__Gemmatimonas;s__	taxonomic classification defined by topology and ANI	topological placement and ANI have congruent species assignments	GCF_000695095.2, s__Gemmatimonas phototrophica, 95.0, 79.97, 0.59; GCA_002483225.1, s__Gemmatimonas sp002483225, 95.0, 79.47, 0.51; GCF_000010305.1, s__Gemmatimonas aurantiaca, 95.0, 78.77, 0.44; GCF_013004105.1, s__Gemmatimonas sp013004105, 95.0, 78.76, 0.5; GCA_903900795.1, s__Gemmatimonas sp903900795, 95.0, 78.67, 0.41; GCA_002737115.1, s__Gemmatimonas sp002737115, 95.0, 78.53, 0.36; GCA_90389…	55.87
GCA_002339385	Gemmatimonadales_bacterium_UBA2589	Group4	N	NO	Gemmatimonadetes	d__Bacteria;p__Gemmatimonadota;c__Gemmatimonadetes;o__Longimicrobiales;f__UBA6960;g__UBA2589;s__UBA2589	NA	2.38726	2.5278	150	80249	23881	54.47	2196	2387255	2548	15915	Saline water, including plankton	Seawater	61.9898S/49.3613W	k__Bacteria (UID2495)	2993	147	91	6	136	5	0	0	0	94.44	5.49	20	d__Bacteria;p__Gemmatimonadota;c__Gemmatimonadetes;o__Longimicrobiales;f__UBA6960;g__UBA2589;s__UBA2589 sp002500925	GCA_002500925.1	95	d__Bacteria;p__Gemmatimonadota;c__Gemmatimonadetes;o__Longimicrobiales;f__UBA6960;g__UBA2589;s__UBA2589 sp002500925	99.48	0.88	GCA_002500925.1	95	d__Bacteria;p__Gemmatimonadota;c__Gemmatimonadetes;o__Longimicrobiales;f__UBA6960;g__UBA2589;s__UBA2589 sp002500925	99.48	0.88	d__Bacteria;p__Gemmatimonadota;c__Gemmatimonadetes;o__Longimicrobiales;f__UBA6960;g__UBA2589;s__	taxonomic classification defined by topology and ANI	topological placement and ANI have congruent species assignments	GCA_002348465.1, s__UBA2589 sp002348465, 95.0, 92.06, 0.85; GCA_002348265.1, s__UBA2589 sp002348265, 95.0, 91.5, 0.87; GCA_002390225.1, s__UBA2589 sp002390225, 95.0, 76.39, 0.1; GCA_013002885.1, s__UBA2589 sp013002885, 95.0, 75.86, 0.04	85.37
GCA_002346665	Gemmatimonadales_bacterium_UBA2988	Group4	Y	NO	Gemmatimonadetes	d__Bacteria;p__Gemmatimonadota;c__Gemmatimonadetes;o__Longimicrobiales;f__UBA6960;g__UBA2988;s__UBA2988	NA	1.99979	2.05443	30	298476	116557	61.29	1895	1999786	3338	66659.5	Unknown	Seawater	Unknown	k__Bacteria (UID2495)	2993	147	91	8	136	3	0	0	0	97.34	3.3	0	d__Bacteria;p__Gemmatimonadota;c__Gemmatimonadetes;o__Longimicrobiales;f__UBA6960;g__UBA2988;s__UBA2988 sp002346665	GCA_002346665.1	95	d__Bacteria;p__Gemmatimonadota;c__Gemmatimonadetes;o__Longimicrobiales;f__UBA6960;g__UBA2988;s__UBA2988 sp002346665	100	1	GCA_002346665.1	95	d__Bacteria;p__Gemmatimonadota;c__Gemmatimonadetes;o__Longimicrobiales;f__UBA6960;g__UBA2988;s__UBA2988 sp002346665	100	1	d__Bacteria;p__Gemmatimonadota;c__Gemmatimonadetes;o__Longimicrobiales;f__UBA6960;g__;s__	taxonomic classification defined by topology and ANI	topological placement and ANI have congruent species assignments	N/A	87.57
GCA_002347035	Gemmatimonadales_bacterium_UBA2982	Group4	Y	NO	Gemmatimonadetes	d__Bacteria;p__Gemmatimonadota;c__Gemmatimonadetes;o__Longimicrobiales;f__UBA6960;g__UBA2982;s__UBA2982	NA	1.85	2.07982	34	310422	96536	53.78	1701	1849998	3094	54411.7	Unknown	Seawater	Unknown	k__Bacteria (UID2495)	2993	147	91	11	132	4	0	0	0	88.95	3.85	0	d__Bacteria;p__Gemmatimonadota;c__Gemmatimonadetes;o__Longimicrobiales;f__UBA6960;g__UBA2982;s__UBA2982 sp002347035	GCA_002347035.1	95	d__Bacteria;p__Gemmatimonadota;c__Gemmatimonadetes;o__Longimicrobiales;f__UBA6960;g__UBA2982;s__UBA2982 sp002347035	100	1	GCA_002347035.1	95	d__Bacteria;p__Gemmatimonadota;c__Gemmatimonadetes;o__Longimicrobiales;f__UBA6960;g__UBA2982;s__UBA2982 sp002347035	100	1	d__Bacteria;p__Gemmatimonadota;c__Gemmatimonadetes;o__Longimicrobiales;f__UBA6960;g__UBA2982;s__	taxonomic classification defined by topology and ANI	topological placement and ANI have congruent species assignments	GCA_009692205.1, s__UBA2982 sp009692205, 95.0, 76.18, 0.04	86.32
GCA_002348265	Gemmatimonadales_bacterium_UBA2975	Group4	Y	NO	Gemmatimonadetes	d__Bacteria;p__Gemmatimonadota;c__Gemmatimonadetes;o__Longimicrobiales;f__UBA6960;g__UBA2589;s__UBA2589	NA	2.40915	2.61183	91	198584	57169	53.94	2143	2409152	2533	26474.2	Unknown	Seawater	Unknown	k__Bacteria (UID2495)	2993	147	91	8	135	4	0	0	0	92.24	4.4	0	d__Bacteria;p__Gemmatimonadota;c__Gemmatimonadetes;o__Longimicrobiales;f__UBA6960;g__UBA2589;s__UBA2589 sp002348265	GCA_002348265.1	95	d__Bacteria;p__Gemmatimonadota;c__Gemmatimonadetes;o__Longimicrobiales;f__UBA6960;g__UBA2589;s__UBA2589 sp002348265	100	0.99	GCA_002348265.1	95	d__Bacteria;p__Gemmatimonadota;c__Gemmatimonadetes;o__Longimicrobiales;f__UBA6960;g__UBA2589;s__UBA2589 sp002348265	100	0.99	d__Bacteria;p__Gemmatimonadota;c__Gemmatimonadetes;o__Longimicrobiales;f__UBA6960;g__UBA2589;s__	taxonomic classification defined by topology and ANI	topological placement and ANI have congruent species assignments	GCA_002348465.1, s__UBA2589 sp002348465, 95.0, 93.86, 0.88; GCA_002500925.1, s__UBA2589 sp002500925, 95.0, 91.55, 0.84; GCA_002390225.1, s__UBA2589 sp002390225, 95.0, 76.26, 0.09; GCA_013002885.1, s__UBA2589 sp013002885, 95.0, 76.08, 0.03	87.17
GCA_002348465	Gemmatimonadales_bacterium_UBA2960	Group4	Y	NO	Gemmatimonadetes	d__Bacteria;p__Gemmatimonadota;c__Gemmatimonadetes;o__Longimicrobiales;f__UBA6960;g__UBA2589;s__UBA2589	NA	2.26614	2.68946	150	74687	25390	53.66	2069	2266138	2594	15107.6	Unknown	Seawater	Unknown	k__Bacteria (UID2495)	2993	147	91	31	114	2	0	0	0	84.26	2.2	0	d__Bacteria;p__Gemmatimonadota;c__Gemmatimonadetes;o__Longimicrobiales;f__UBA6960;g__UBA2589;s__UBA2589 sp002348465	GCA_002348465.1	95	d__Bacteria;p__Gemmatimonadota;c__Gemmatimonadetes;o__Longimicrobiales;f__UBA6960;g__UBA2589;s__UBA2589 sp002348465	100	0.98	GCA_002348465.1	95	d__Bacteria;p__Gemmatimonadota;c__Gemmatimonadetes;o__Longimicrobiales;f__UBA6960;g__UBA2589;s__UBA2589 sp002348465	100	0.98	d__Bacteria;p__Gemmatimonadota;c__Gemmatimonadetes;o__Longimicrobiales;f__UBA6960;g__UBA2589;s__	taxonomic classification defined by topology and ANI	topological placement and ANI have congruent species assignments	GCA_002348265.1, s__UBA2589 sp002348265, 95.0, 93.86, 0.88; GCA_002500925.1, s__UBA2589 sp002500925, 95.0, 92.06, 0.86; GCA_013002885.1, s__UBA2589 sp013002885, 95.0, 77.01, 0.04; GCA_002390225.1, s__UBA2589 sp002390225, 95.0, 76.68, 0.11	79.63
GCA_002348665	Gemmatimonadales_bacterium_UBA2981	Group4	Y	NO	Gemmatimonadetes	d__Bacteria;p__Gemmatimonadota;c__Gemmatimonadetes;o__Longimicrobiales;f__UBA6960;g__UBA1138;s__UBA1138	NA	2.23998	2.69747	224	124484	14480	50.6	2118	2239983	2532	9999.9	Unknown	Seawater	Unknown	k__Bacteria (UID2495)	2993	147	91	27	117	3	0	0	0	83.04	3.3	33.33	d__Bacteria;p__Gemmatimonadota;c__Gemmatimonadetes;o__Longimicrobiales;f__UBA6960;g__UBA1138;s__UBA1138 sp002724575	GCA_002724575.1	95	d__Bacteria;p__Gemmatimonadota;c__Gemmatimonadetes;o__Longimicrobiales;f__UBA6960;g__UBA1138;s__UBA1138 sp002724575	95.16	0.76	GCA_002724575.1	95	d__Bacteria;p__Gemmatimonadota;c__Gemmatimonadetes;o__Longimicrobiales;f__UBA6960;g__UBA1138;s__UBA1138 sp002724575	95.16	0.76	d__Bacteria;p__Gemmatimonadota;c__Gemmatimonadetes;o__Longimicrobiales;f__UBA6960;g__UBA1138;s__	taxonomic classification defined by topology and ANI	topological placement and ANI have congruent species assignments	GCA_002313925.1, s__UBA1138 sp002313925, 95.0, 87.56, 0.78; GCA_002501085.1, s__UBA1138 sp002501085, 95.0, 87.42, 0.8; GCA_012960225.1, s__UBA1138 sp012960225, 95.0, 87.0, 0.86; GCA_002311875.1, s__UBA1138 sp002311875, 95.0, 79.93, 0.67; GCA_009937285.1, s__UBA1138 sp009937285, 95.0, 77.01, 0.01; GCA_003447875.1, s__UBA1138 sp003447875, 95.0, 76.59, 0.03	70.7
GCA_002348755	Gemmatimonadales_bacterium_UBA2969	Group4	N	NO	Gemmatimonadetes	d__Bacteria;p__Gemmatimonadota;c__Gemmatimonadetes;o__Longimicrobiales;f__UBA6960;g__GCA-2718595;s__GCA-2718595	NA	2.02284	2.41447	169	59530	17101	44.93	1916	2022841	2527	11969.5	Saline water, including plankton	Seawater	61.9898S/49.3613W	k__Bacteria (UID2495)	2993	147	91	26	116	5	0	0	0	83.78	5.49	40	d__Bacteria;p__Gemmatimonadota;c__Gemmatimonadetes;o__Longimicrobiales;f__UBA6960;g__GCA-2718595;s__GCA-2718595 sp002718595	GCA_002718595.1	95	d__Bacteria;p__Gemmatimonadota;c__Gemmatimonadetes;o__Longimicrobiales;f__UBA6960;g__GCA-2718595;s__GCA-2718595 sp002718595	97.14	0.93	GCA_002718595.1	95	d__Bacteria;p__Gemmatimonadota;c__Gemmatimonadetes;o__Longimicrobiales;f__UBA6960;g__GCA-2718595;s__GCA-2718595 sp002718595	97.14	0.93	d__Bacteria;p__Gemmatimonadota;c__Gemmatimonadetes;o__Longimicrobiales;f__UBA6960;g__GCA-2718595;s__	taxonomic classification defined by topology and ANI	topological placement and ANI have congruent species assignments	GCA_012959595.1, s__GCA-2718595 sp012959595, 95.0, 77.54, 0.23	72.82
GCA_002377325	Gemmatimonadales_bacterium_UBA3512	Group4	Y	NO	Gemmatimonadetes	d__Bacteria;p__Gemmatimonadota;c__Gemmatimonadetes;o__Longimicrobiales;f__UBA6960;g__UBA2589;s__UBA2589	NA	2.38776	2.59032	223	67760	14043	53.81	2247	2387756	2504	10707.4	Unknown	Seawater	Unknown	k__Bacteria (UID2495)	2993	147	91	9	134	4	0	0	0	92.18	4.4	0	d__Bacteria;p__Gemmatimonadota;c__Gemmatimonadetes;o__Longimicrobiales;f__UBA6960;g__UBA2589;s__UBA2589 sp002500925	GCA_002500925.1	95	d__Bacteria;p__Gemmatimonadota;c__Gemmatimonadetes;o__Longimicrobiales;f__UBA6960;g__UBA2589;s__UBA2589 sp002500925	99.52	0.9	GCA_002500925.1	95	d__Bacteria;p__Gemmatimonadota;c__Gemmatimonadetes;o__Longimicrobiales;f__UBA6960;g__UBA2589;s__UBA2589 sp002500925	99.52	0.9	d__Bacteria;p__Gemmatimonadota;c__Gemmatimonadetes;o__Longimicrobiales;f__UBA6960;g__UBA2589;s__	taxonomic classification defined by topology and ANI	topological placement and ANI have congruent species assignments	GCA_002348465.1, s__UBA2589 sp002348465, 95.0, 91.97, 0.81; GCA_002348265.1, s__UBA2589 sp002348265, 95.0, 91.45, 0.88; GCA_002390225.1, s__UBA2589 sp002390225, 95.0, 76.65, 0.12; GCA_013002885.1, s__UBA2589 sp013002885, 95.0, 76.01, 0.06	84.75
GCA_002377365	Gemmatimonadales_bacterium_UBA3511	Group4	Y	NO	Gemmatimonadetes	d__Bacteria;p__Gemmatimonadota;c__Gemmatimonadetes;o__Longimicrobiales;f__UBA6960;g__GCA-2718595;s__GCA-2718595	NA	2.00428	2.42678	112	111554	35130	44.67	1869	2004281	2565	17895.4	Unknown	Seawater	Unknown	k__Bacteria (UID2495)	2993	147	91	23	122	1	1	0	0	82.59	3.3	0	d__Bacteria;p__Gemmatimonadota;c__Gemmatimonadetes;o__Longimicrobiales;f__UBA6960;g__GCA-2718595;s__GCA-2718595 sp002718595	GCA_002718595.1	95	d__Bacteria;p__Gemmatimonadota;c__Gemmatimonadetes;o__Longimicrobiales;f__UBA6960;g__GCA-2718595;s__GCA-2718595 sp002718595	97.42	0.91	GCA_002718595.1	95	d__Bacteria;p__Gemmatimonadota;c__Gemmatimonadetes;o__Longimicrobiales;f__UBA6960;g__GCA-2718595;s__GCA-2718595 sp002718595	97.42	0.91	d__Bacteria;p__Gemmatimonadota;c__Gemmatimonadetes;o__Longimicrobiales;f__UBA6960;g__GCA-2718595;s__	taxonomic classification defined by topology and ANI	topological placement and ANI have congruent species assignments	GCA_012959595.1, s__GCA-2718595 sp012959595, 95.0, 77.82, 0.25	82.23
GCA_002377525	Gemmatimonadales_bacterium_UBA3501	Group4	Y	NO	Gemmatimonadetes	d__Bacteria;p__Gemmatimonadota;c__Gemmatimonadetes;o__Longimicrobiales;f__UBA6960;g__UBA1138;s__UBA1138	NA	2.38879	2.81332	161	89107	24842	50.69	2206	2388789	2668	14837.2	Unknown	Seawater	Unknown	k__Bacteria (UID2495)	2993	147	91	33	108	6	0	0	0	84.91	3.76	16.67	d__Bacteria;p__Gemmatimonadota;c__Gemmatimonadetes;o__Longimicrobiales;f__UBA6960;g__UBA1138;s__UBA1138 sp002724575	GCA_002724575.1	95	d__Bacteria;p__Gemmatimonadota;c__Gemmatimonadetes;o__Longimicrobiales;f__UBA6960;g__UBA1138;s__UBA1138 sp002724575	99.58	0.82	GCA_002724575.1	95	d__Bacteria;p__Gemmatimonadota;c__Gemmatimonadetes;o__Longimicrobiales;f__UBA6960;g__UBA1138;s__UBA1138 sp002724575	99.58	0.82	d__Bacteria;p__Gemmatimonadota;c__Gemmatimonadetes;o__Longimicrobiales;f__UBA6960;g__UBA1138;s__	taxonomic classification defined by topology and ANI	topological placement and ANI have congruent species assignments	GCA_002313925.1, s__UBA1138 sp002313925, 95.0, 87.42, 0.77; GCA_002501085.1, s__UBA1138 sp002501085, 95.0, 87.3, 0.81; GCA_012960225.1, s__UBA1138 sp012960225, 95.0, 86.89, 0.87; GCA_002311875.1, s__UBA1138 sp002311875, 95.0, 79.54, 0.66; GCA_003447875.1, s__UBA1138 sp003447875, 95.0, 77.38, 0.04; GCA_009937285.1, s__UBA1138 sp009937285, 95.0, 76.15, 0.02	72.48
GCA_002377615	Gemmatimonadales_bacterium_UBA3497	Group4	Y	NO	Gemmatimonadetes	d__Bacteria;p__Gemmatimonadota;c__Gemmatimonadetes;o__Longimicrobiales;f__UBA6960;g__GCA-2718595;s__GCA-2718595	NA	1.93505	2.11643	45	191570	117178	45.09	1734	1935054	2910	43001.2	Unknown	Seawater	Unknown	k__Bacteria (UID2495)	2993	147	91	20	125	2	0	0	0	91.43	2.2	0	d__Bacteria;p__Gemmatimonadota;c__Gemmatimonadetes;o__Longimicrobiales;f__UBA6960;g__GCA-2718595;s__GCA-2718595 sp002718595	GCA_002718595.1	95	d__Bacteria;p__Gemmatimonadota;c__Gemmatimonadetes;o__Longimicrobiales;f__UBA6960;g__GCA-2718595;s__GCA-2718595 sp002718595	97.27	0.96	GCA_002718595.1	95	d__Bacteria;p__Gemmatimonadota;c__Gemmatimonadetes;o__Longimicrobiales;f__UBA6960;g__GCA-2718595;s__GCA-2718595 sp002718595	97.27	0.96	d__Bacteria;p__Gemmatimonadota;c__Gemmatimonadetes;o__Longimicrobiales;f__UBA6960;g__GCA-2718595;s__	taxonomic classification defined by topology and ANI	topological placement and ANI have congruent species assignments	GCA_012959595.1, s__GCA-2718595 sp012959595, 95.0, 77.62, 0.24	84.22
[truncated: 323 more rows]
[truncated: 3 more columns]

## Sheet: ST 3
Pariwise comparsion of Average Amino acid Identity of Genomes in 4 Gemmatimonadota Groups and reference genomes		Group1	Group1	Group1	Group1	Group1	Group1	Group1	Group1	Group1	Group1	Group1	Group2	Group2	Group2	Group2	Group2	Group2	Group2	Group2	Group2	Group2	Group2	Group2	Group2	Group2	Group2	Group2	Group2	Group2	Group2	Group2	Group2	Group2	Group2	Group2	Group2	Group2	Group2	Group2	Group2	Group2	Group2	Group2	Group2	Group2	Group2	Group2	Group2
[truncated: 456 more rows]
[truncated: 407 more columns]

[truncated: 12 more sheets: ST 4, ST 5, ST 6, ST 7, ST 8, ST 9, ST 10, ST 11, ST 12, ST 13, ST 14, ST 15]
